# Supplementary material for: Plausibility of Early Life in a Relatively Wide Temperature Range: Clues from Simulated Metabolic Network Expansion
Source: Life (Basel). 2021 Jul 24;11(8):738. doi: 10.3390/life11080738 (PMC8398716; doi:10.3390/life11080738)
Supplement: Supplementary file 1 [file life-11-00738-s001.zip]

Archive with 5 entries (5 files):
- Supplementary Figures.pdf
- Table S1.xlsx
- Table S2.xlsx
- Table S3.xlsx
- Table S4.xlsx
