# Supplementary material for: Plausibility of Early Life in a Relatively Wide Temperature Range: Clues from Simulated Metabolic Network Expansion
Source: Life (Basel). 2021 Jul 24;11(8):738. doi: 10.3390/life11080738 (PMC8398716; doi:10.3390/life11080738)
Supplement: Supplementary file 1 [file life-11-00738-s001.zip › Table S1.xlsx]

## Sheet: Sheet1
Table S1 Background metabolism pool
KEGG reaction ID	Reaction formula in metabolite ID	Reaction formula in metabolite name
R00004	C00013 + C00001 <=> 2 C00009	Diphosphate + H2O <=> 2 Orthophosphate
R00005	C01010 + C00001 <=> 2 C00011 + 2 C00014	Urea-1-carboxylate + H2O <=> 2 CO2 + 2 Ammonia
R00006	C00900 + C00011 <=> 2 C00022	2-Acetolactate + CO2 <=> 2 Pyruvate
R00008	C06033 <=> 2 C00022	Parapyruvate <=> 2 Pyruvate
R00009	2 C00027 <=> C00007 + 2 C00001	2 Hydrogen peroxide <=> Oxygen + 2 H2O
R00010	C01083 + C00001 <=> 2 C00031	alpha,alpha-Trehalose + H2O <=> 2 D-Glucose
R00011	2 C19610 + C00027 + 2 C00080 <=> 2 C19611 + 2 C00001	2 Manganese(2+) + Hydrogen peroxide + 2 H+ <=> 2 Manganese(3+) + 2 H2O
R00012	2 C00044 <=> C00013 + C01261	2 GTP <=> Diphosphate + P1,P4-Bis(5'-guanosyl) tetraphosphate
R00013	2 C00048 <=> C01146 + C00011	2 Glyoxylate <=> 2-Hydroxy-3-oxopropanoate + CO2
R00014	C00022 + C00068 <=> C05125 + C00011	Pyruvate + Thiamin diphosphate <=> 2-(alpha-Hydroxyethyl)thiamine diphosphate + CO2
R00015	2 C00089 <=> C00031 + C03661	2 Sucrose <=> D-Glucose + 1F-beta-D-Fructosylsucrose
R00018	2 C00134 <=> C06366 + C00014	2 Putrescine <=> sym-Homospermidine + Ammonia
R00022	C01674 + C00001 <=> 2 C00140	Chitobiose + H2O <=> 2 N-Acetyl-D-glucosamine
R00023	2 C00192 + 2 C00003 <=> C01818 + 2 C00004 + 2 C00080	2 Hydroxylamine + 2 NAD+ <=> Hyponitrite + 2 NADH + 2 H+
R00024	C01182 + C00011 + C00001 <=> 2 C00197	D-Ribulose 1,5-bisphosphate + CO2 + H2O <=> 2 3-Phospho-D-glycerate
R00025	C18091 + C00007 + C01847 <=> C00084 + C00088 + C00061 + C00001	Ethylnitronate + Oxygen + Reduced FMN <=> Acetaldehyde + Nitrite + FMN + H2O
R00026	C00185 + C00001 <=> 2 C00221	Cellobiose + H2O <=> 2 beta-D-Glucose
R00027	C01408 <=> 2 C00261	Benzoin <=> 2 Benzaldehyde
R00028	C00208 + C00001 <=> 2 C00031	Maltose + H2O <=> 2 D-Glucose
R00031	C00007 + 2 C00082 <=> 2 C00355	Oxygen + 2 L-Tyrosine <=> 2 3,4-Dihydroxy-L-phenylalanine
R00032	C02094 + C00007 <=> 2 C00376	beta-Carotene + Oxygen <=> 2 Retinal
R00033	C00378 + C00007 <=> C00027 + C05856	Thiamine + Oxygen <=> Hydrogen peroxide + Thiamine aldehyde
R00036	2 C00430 <=> C00931 + 2 C00001	2 5-Aminolevulinate <=> Porphobilinogen + 2 H2O
R00038	2 C00479 <=> C02948	2 Propanal <=> 4-Hydroxyhexan-3-one
R00039	2 C00492 <=> C08242 + C00089	2 Raffinose <=> Lychnose + Sucrose
R00042	2 C01179 + C00007 <=> 2 C00642 + 2 C00011	2 3-(4-Hydroxyphenyl)pyruvate + Oxygen <=> 2 4-Hydroxyphenylacetate + 2 CO2
R00043	C04547 + C00007 <=> 2 C00755	1,2-Bis(4-hydroxy-3-methoxyphenyl)ethylene + Oxygen <=> 2 4-Hydroxy-3-methoxy-benzaldehyde
R00044	2 C01795 + C00007 <=> 2 C00757 + 2 C00001	2 Columbamine + Oxygen <=> 2 Berberine + 2 H2O
R00045	C00007 + 2 C00355 <=> 2 C00822 + 2 C00001	Oxygen + 2 3,4-Dihydroxy-L-phenylalanine <=> 2 Dopaquinone + 2 H2O
R00048	C04546 + C00001 <=> 2 C01089	(R)-3-((R)-3-Hydroxybutanoyloxy)butanoate + H2O <=> 2 (R)-3-Hydroxybutanoate
R00049	2 C01158 <=> C00031 + C04101	2 1-O-Galloyl-beta-D-glucose <=> D-Glucose + 1-O,6-O-Digalloyl-beta-D-glucose
R00053	C01572 + C00001 <=> 2 C01424	Digallate + H2O <=> 2 Gallate
R00054	C02868 + C00001 <=> 2 C01839	Lecanoric acid + H2O <=> 2 Orsellinate
R00055	2 C00294 + C00007 <=> 2 C01993 + 2 C00001	2 Inosine + Oxygen <=> 2 5'-Oxoinosine + 2 H2O
R00058	C00007 + 2 C00090 <=> 2 C02351 + 2 C00001	Oxygen + 2 Catechol <=> 2 o-Benzoquinone + 2 H2O
R00059	C01255 + C00001 <=> 2 C02378	N-(6-Aminohexanoyl)-6-aminohexanoate + H2O <=> 2 6-Aminohexanoate
R00060	C00007 + 2 C00495 <=> 2 C03036 + 2 C00001	Oxygen + 2 Sulochrin <=> 2 (+)-Bisdechlorogeodin + 2 H2O
R00061	C00007 + 2 C00495 <=> 2 C03040 + 2 C00001	Oxygen + 2 Sulochrin <=> 2 (-)-Bisdechlorogeodin + 2 H2O
R00062	2 C03374 <=> C00486 + C05787	2 Bilirubin-glucuronoside <=> Bilirubin + Bilirubin beta-diglucuronide
R00063	2 C01175 <=> C04275 + C00031	2 1-O-Sinapoyl-beta-D-glucose <=> 1,2-Bis-O-sinapoyl-beta-D-glucoside + D-Glucose
R00066	2 C04332 <=> C00255 + C04732	2 6,7-Dimethyl-8-(D-ribityl)lumazine <=> Riboflavin + 5-Amino-6-(1-D-ribitylamino)uracil
R00068	C00007 + 2 C00072 <=> 2 C05422 + 2 C00001	Oxygen + 2 Ascorbate <=> 2 Dehydroascorbate + 2 H2O
R00069	C05565 + C00027 <=> C03680 + C00007 + C00001	Hydantoin-5-propionate + Hydrogen peroxide <=> 4-Imidazolone-5-propanoate + Oxygen + H2O
R00070	2 C05791 + C00007 <=> 2 C05795 + 2 C00001	2 D-Urobilinogen + Oxygen <=> 2 D-Urobilin + 2 H2O
R00072	C05856 + C00007 + C00001 <=> C00027 + C02892	Thiamine aldehyde + Oxygen + H2O <=> Hydrogen peroxide + Thiamine acetic acid
R00074	4 C01987 + 3 C00007 <=> 2 C02161 + 6 C00001	4 2-Aminophenol + 3 Oxygen <=> 2 2-Aminophenoxazin-3-one + 6 H2O
R00075	3 C00019 <=> 3 C00170 + C05324	3 S-Adenosyl-L-methionine <=> 3 5'-Methylthioadenosine + Nicotianamine
R00078	C00007 + 4 C14818 + 4 C00080 <=> 4 C14819 + 2 C00001	Oxygen + 4 Fe2+ + 4 H+ <=> 4 Fe3+ + 2 H2O
R00080	4 C00090 + 3 C00007 <=> 6 C00001 + 2 C03861	4 Catechol + 3 Oxygen <=> 6 H2O + 2 Dibenzo[1,4]dioxin-2,3-dione
R00084	4 C00931 + C00001 <=> C01024 + 4 C00014	4 Porphobilinogen + H2O <=> Hydroxymethylbilane + 4 Ammonia
R00085	C00002 + 2 C00001 <=> C00020 + 2 C00009	ATP + 2 H2O <=> AMP + 2 Orthophosphate
R00086	C00002 + C00001 <=> C00008 + C00009	ATP + H2O <=> ADP + Orthophosphate
R00087	C00002 + C00001 <=> C00020 + C00013	ATP + H2O <=> AMP + Diphosphate
R00088	C00002 + C00001 <=> C00081 + C00014	ATP + H2O <=> ITP + Ammonia
R00089	C00002 <=> C00575 + C00013	ATP <=> 3',5'-Cyclic AMP + Diphosphate
R00090	C00027 + C00004 + C00080 <=> C00003 + 2 C00001	Hydrogen peroxide + NADH + H+ <=> NAD+ + 2 H2O
R00091	C00003 + 2 C00010 <=> C02015 + C00004 + C00080	NAD+ + 2 CoA <=> CoA-disulfide + NADH + H+
R00092	C00003 + 2 C14818 <=> C00004 + C00080 + 2 C14819	NAD+ + 2 Fe2+ <=> NADH + H+ + 2 Fe3+
R00093	2 C00025 + C00003 <=> C00064 + C00026 + C00004 + C00080	2 L-Glutamate + NAD+ <=> L-Glutamine + 2-Oxoglutarate + NADH + H+
R00094	2 C00051 + C00003 <=> C00127 + C00004 + C00080	2 Glutathione + NAD+ <=> Glutathione disulfide + NADH + H+
R00095	C00003 + 2 C00072 <=> C00004 + 2 C01041 + C00080	NAD+ + 2 Ascorbate <=> NADH + 2 Monodehydroascorbate + H+
R00097	C00003 + 2 C00541 + 2 C00001 + C00080 <=> C00004 + 2 C00992	NAD+ + 2 Cob(II)alamin + 2 H2O + H+ <=> NADH + 2 Aquacob(III)alamin
R00099	C00003 + 2 C00853 <=> C00004 + C00080 + 2 C00541	NAD+ + 2 Cob(I)alamin <=> NADH + H+ + 2 Cob(II)alamin
R00102	C00003 + C00001 <=> C00153 + C00301	NAD+ + H2O <=> Nicotinamide + ADP-ribose
R00103	C00003 + C00001 <=> C00020 + C00455	NAD+ + H2O <=> AMP + Nicotinamide D-ribonucleotide
R00104	C00002 + C00003 <=> C00008 + C00006	ATP + NAD+ <=> ADP + NADP+
R00105	C00002 + C00004 <=> C00008 + C00005	ATP + NADH <=> ADP + NADPH
R00107	C00005 + 2 C00992 <=> C00006 + 2 C00541 + 2 C00001 + C00080	NADPH + 2 Aquacob(III)alamin <=> NADP+ + 2 Cob(II)alamin + 2 H2O + H+
R00111	C00005 + 2 C05933 + 2 C00007 + C00080 <=> C00006 + 2 C00533 + 2 C00327 + 2 C00001	NADPH + 2 N(omega)-Hydroxyarginine + 2 Oxygen + H+ <=> NADP+ + 2 Nitric oxide + 2 L-Citrulline + 2 H2O
R00112	C00005 + C00003 <=> C00006 + C00004	NADPH + NAD+ <=> NADP+ + NADH
R00113	C00027 + C00005 + C00080 <=> C00006 + 2 C00001	Hydrogen peroxide + NADPH + H+ <=> NADP+ + 2 H2O
R00114	2 C00025 + C00006 <=> C00064 + C00026 + C00005 + C00080	2 L-Glutamate + NADP+ <=> L-Glutamine + 2-Oxoglutarate + NADPH + H+
R00115	2 C00051 + C00006 <=> C00127 + C00005 + C00080	2 Glutathione + NADP+ <=> Glutathione disulfide + NADPH + H+
R00118	C00006 + C00001 <=> C00009 + C00003	NADP+ + H2O <=> Orthophosphate + NAD+
R00119	C00006 + C00253 <=> C00153 + C13051	NADP+ + Nicotinate <=> Nicotinamide + Nicotinic acid adenine dinucleotide phosphate
R00120	C00007 + 2 C00051 <=> C00127 + C00027	Oxygen + 2 Glutathione <=> Glutathione disulfide + Hydrogen peroxide
R00122	C00008 + C00001 <=> C00020 + C00009	ADP + H2O <=> AMP + Orthophosphate
R00123	C00008 + C00001 <=> C00104 + C00014	ADP + H2O <=> IDP + Ammonia
R00125	C01260 + C00001 <=> 2 C00008	P1,P4-Bis(5'-adenosyl)tetraphosphate + H2O <=> 2 ADP
R00126	C00008 + C00002 <=> C00009 + C01260	ADP + ATP <=> Orthophosphate + P1,P4-Bis(5'-adenosyl)tetraphosphate
R00127	C00002 + C00020 <=> 2 C00008	ATP + AMP <=> 2 ADP
R00128	C03483 + C00001 <=> C00002 + C00009	Adenosine tetraphosphate + H2O <=> ATP + Orthophosphate
R00129	C00002 + C04856 <=> C00008 + C00009 + C00004	ATP + (6S)-6beta-Hydroxy-1,4,5,6-tetrahydronicotinamide-adenine dinucleotide <=> ADP + Orthophosphate + NADH
R00130	C00002 + C00882 <=> C00008 + C00010	ATP + Dephospho-CoA <=> ADP + CoA
R00131	C00086 + C00001 <=> C00011 + 2 C00014	Urea + H2O <=> CO2 + 2 Ammonia
R00132	C01353 <=> C00011 + C00001	Carbonic acid <=> CO2 + H2O
R00134	C00058 + C00006 <=> C00011 + C00005 + C00080	Formate + NADP+ <=> CO2 + NADPH + H+
R00137	C00002 + C00455 <=> C00013 + C00003	ATP + Nicotinamide D-ribonucleotide <=> Diphosphate + NAD+
R00138	C00536 + C00001 <=> C00013 + C00009	Triphosphate + H2O <=> Diphosphate + Orthophosphate
R00139	C11038 + C00002 <=> C11039 + C00008	2'-Deoxy-5-hydroxymethylcytidine-5'-diphosphate + ATP <=> 2'-Deoxy-5-hydroxymethylcytidine-5'-triphosphate + ADP
R00140	C11038 + C00008 <=> C03997 + C00002	2'-Deoxy-5-hydroxymethylcytidine-5'-diphosphate + ADP <=> 5-Hydroxymethyldeoxycytidylate + ATP
R00141	C00002 + C00014 <=> C00008 + C02306	ATP + Ammonia <=> ADP + Phosphoramidate
R00143	C00014 + C00003 + C00001 <=> C00192 + C00004 + C00080	Ammonia + NAD+ + H2O <=> Hydroxylamine + NADH + H+
R00149	2 C00002 + C00014 + C00011 + C00001 <=> 2 C00008 + C00009 + C00169	2 ATP + Ammonia + CO2 + H2O <=> 2 ADP + Orthophosphate + Carbamoyl phosphate
R00150	C00002 + C00014 + C00011 <=> C00008 + C00169	ATP + Ammonia + CO2 <=> ADP + Carbamoyl phosphate
R00152	C01326 + 2 C00001 <=> C00014 + C00058	Hydrogen cyanide + 2 H2O <=> Ammonia + Formate
R00155	C00015 + C00001 <=> C00105 + C00009	UDP + H2O <=> UMP + Orthophosphate
R00156	C00002 + C00015 <=> C00008 + C00075	ATP + UDP <=> ADP + UTP
R00157	C00075 + C00020 <=> C00015 + C00008	UTP + AMP <=> UDP + ADP
R00158	C00002 + C00105 <=> C00008 + C00015	ATP + UMP <=> ADP + UDP
R00159	C00075 + C00001 <=> C00015 + C00009	UTP + H2O <=> UDP + Orthophosphate
R00160	C00016 + C00001 <=> C00020 + C00061	FAD + H2O <=> AMP + FMN
R00161	C00002 + C00061 <=> C00013 + C00016	ATP + FMN <=> Diphosphate + FAD
R00173	C00018 + C00001 <=> C00250 + C00009	Pyridoxal phosphate + H2O <=> Pyridoxal + Orthophosphate
R00174	C00002 + C00250 <=> C00008 + C00018	ATP + Pyridoxal <=> ADP + Pyridoxal phosphate
R00175	C00019 + C00001 <=> C00170 + C00263	S-Adenosyl-L-methionine + H2O <=> 5'-Methylthioadenosine + L-Homoserine
R00177	C00009 + C00013 + C00019 <=> C00002 + C00073 + C00001	Orthophosphate + Diphosphate + S-Adenosyl-L-methionine <=> ATP + L-Methionine + H2O
R00178	C00019 + C00080 <=> C01137 + C00011	S-Adenosyl-L-methionine + H+ <=> S-Adenosylmethioninamine + CO2
R00179	C00019 <=> C01234 + C00170	S-Adenosyl-L-methionine <=> 1-Aminocyclopropane-1-carboxylate + 5'-Methylthioadenosine
R00180	C00019 <=> C00170 + C02926	S-Adenosyl-L-methionine <=> 5'-Methylthioadenosine + Homoserine lactone
R00181	C00020 + C00001 <=> C00130 + C00014	AMP + H2O <=> IMP + Ammonia
R00182	C00020 + C00001 <=> C00147 + C00117	AMP + H2O <=> Adenine + D-Ribose 5-phosphate
R00183	C00020 + C00001 <=> C00212 + C00009	AMP + H2O <=> Adenosine + Orthophosphate
R00184	C01260 + C00001 <=> C00002 + C00020	P1,P4-Bis(5'-adenosyl)tetraphosphate + H2O <=> ATP + AMP
R00185	C00002 + C00212 <=> C00008 + C00020	ATP + Adenosine <=> ADP + AMP
R00187	C06197 + C00001 <=> C00008 + C00020	P1,P3-Bis(5'-adenosyl) triphosphate + H2O <=> ADP + AMP
R00188	C00054 + C00001 <=> C00020 + C00009	Adenosine 3',5'-bisphosphate + H2O <=> AMP + Orthophosphate
R00189	C00002 + C00857 + C00014 <=> C00020 + C00013 + C00003	ATP + Deamino-NAD+ + Ammonia <=> AMP + Diphosphate + NAD+
R00190	C00020 + C00013 <=> C00147 + C00119	AMP + Diphosphate <=> Adenine + 5-Phospho-alpha-D-ribose 1-diphosphate
R00191	C00575 + C00001 <=> C00020	3',5'-Cyclic AMP + H2O <=> AMP
R00192	C00021 + C00001 <=> C00212 + C00155	S-Adenosyl-L-homocysteine + H2O <=> Adenosine + L-Homocysteine
R00193	C00021 + C00001 <=> C03431 + C00014	S-Adenosyl-L-homocysteine + H2O <=> S-Inosyl-L-homocysteine + Ammonia
R00194	C00021 + C00001 <=> C03539 + C00147	S-Adenosyl-L-homocysteine + H2O <=> S-Ribosyl-L-homocysteine + Adenine
R00195	C06393 + C00001 <=> C00022 + 2 C00014	2,3-Diaminopropanoate + H2O <=> Pyruvate + 2 Ammonia
R00199	C00002 + C00022 + C00001 <=> C00020 + C00074 + C00009	ATP + Pyruvate + H2O <=> AMP + Phosphoenolpyruvate + Orthophosphate
R00200	C00002 + C00022 <=> C00008 + C00074	ATP + Pyruvate <=> ADP + Phosphoenolpyruvate
R00203	C00546 + C00003 + C00001 <=> C00022 + C00004 + C00080	Methylglyoxal + NAD+ + H2O <=> Pyruvate + NADH + H+
R00205	C00546 + C00006 + C00001 <=> C00022 + C00005 + C00080	Methylglyoxal + NADP+ + H2O <=> Pyruvate + NADPH + H+
R00206	C00002 + C00022 + C00009 <=> C00020 + C00074 + C00013	ATP + Pyruvate + Orthophosphate <=> AMP + Phosphoenolpyruvate + Diphosphate
R00207	C00022 + C00009 + C00007 <=> C00227 + C00027 + C00011	Pyruvate + Orthophosphate + Oxygen <=> Acetyl phosphate + Hydrogen peroxide + CO2
R00208	C00074 + C00001 <=> C00022 + C00009	Phosphoenolpyruvate + H2O <=> Pyruvate + Orthophosphate
R00209	C00022 + C00010 + C00003 <=> C00024 + C00011 + C00004 + C00080	Pyruvate + CoA + NAD+ <=> Acetyl-CoA + CO2 + NADH + H+
R00210	C00022 + C00010 + C00006 <=> C00024 + C00011 + C00005 + C00080	Pyruvate + CoA + NADP+ <=> Acetyl-CoA + CO2 + NADPH + H+
R00211	C00022 + C00010 + C00007 <=> C00027 + C00024 + C00011	Pyruvate + CoA + Oxygen <=> Hydrogen peroxide + Acetyl-CoA + CO2
R00212	C00024 + C00058 <=> C00010 + C00022	Acetyl-CoA + Formate <=> CoA + Pyruvate
R00213	C03015 + C00001 <=> C00022 + 2 C00014 + C00011	O-Carbamoyl-L-serine + H2O <=> Pyruvate + 2 Ammonia + CO2
R00214	C00149 + C00003 <=> C00022 + C00011 + C00004 + C00080	(S)-Malate + NAD+ <=> Pyruvate + CO2 + NADH + H+
R00215	C00497 + C00003 <=> C00022 + C00011 + C00004 + C00080	(R)-Malate + NAD+ <=> Pyruvate + CO2 + NADH + H+
R00216	C00149 + C00006 <=> C00022 + C00011 + C00005 + C00080	(S)-Malate + NADP+ <=> Pyruvate + CO2 + NADPH + H+
R00217	C00036 <=> C00022 + C00011	Oxaloacetate <=> Pyruvate + CO2
R00218	C03248 + C00001 <=> C00022 + C00011	Acetylenedicarboxylate + H2O <=> Pyruvate + CO2
R00219	C00022 + C00011 <=> C03981	Pyruvate + CO2 <=> 2-Hydroxyethylenedicarboxylate
R00220	C00065 <=> C00022 + C00014	L-Serine <=> Pyruvate + Ammonia
R00221	C00740 <=> C00022 + C00014	D-Serine <=> Pyruvate + Ammonia
R00223	C00716 <=> C00022 + C00014	Serine <=> Pyruvate + Ammonia
R00224	C00022 <=> C00084 + C00011	Pyruvate <=> Acetaldehyde + CO2
R00226	C06010 + C00011 <=> 2 C00022	(S)-2-Acetolactate + CO2 <=> 2 Pyruvate
R00227	C00024 + C00001 <=> C00010 + C00033	Acetyl-CoA + H2O <=> CoA + Acetate
R00228	C00084 + C00010 + C00003 <=> C00024 + C00004 + C00080	Acetaldehyde + CoA + NAD+ <=> Acetyl-CoA + NADH + H+
R00229	C00002 + C00033 + C00010 <=> C00008 + C00024 + C00009	ATP + Acetate + CoA <=> ADP + Acetyl-CoA + Orthophosphate
R00230	C00024 + C00009 <=> C00010 + C00227	Acetyl-CoA + Orthophosphate <=> CoA + Acetyl phosphate
R00233	C00083 <=> C00024 + C00011	Malonyl-CoA <=> Acetyl-CoA + CO2
R00235	C00002 + C00033 + C00010 <=> C00020 + C00013 + C00024	ATP + Acetate + CoA <=> AMP + Diphosphate + Acetyl-CoA
R00236	C05993 + C00010 <=> C00020 + C00024	Acetyl adenylate + CoA <=> AMP + Acetyl-CoA
R00237	C01011 <=> C00024 + C00022	(3S)-Citramalyl-CoA <=> Acetyl-CoA + Pyruvate
R00238	2 C00024 <=> C00010 + C00332	2 Acetyl-CoA <=> CoA + Acetoacetyl-CoA
R00239	C00002 + C00025 <=> C00008 + C03287	ATP + L-Glutamate <=> ADP + L-Glutamyl 5-phosphate
R00241	C00002 + C00025 <=> C00008 + C05765	ATP + L-Glutamate <=> ADP + L-Glutamyl 1-phosphate
R00243	C00025 + C00003 + C00001 <=> C00026 + C00014 + C00004 + C00080	L-Glutamate + NAD+ + H2O <=> 2-Oxoglutarate + Ammonia + NADH + H+
R00245	C01165 + C00003 + C00001 <=> C00025 + C00004 + C00080	L-Glutamate 5-semialdehyde + NAD+ + H2O <=> L-Glutamate + NADH + H+
R00248	C00025 + C00006 + C00001 <=> C00026 + C00014 + C00005 + C00080	L-Glutamate + NADP+ + H2O <=> 2-Oxoglutarate + Ammonia + NADPH + H+
R00250	C00025 + C00007 + C00001 <=> C00026 + C00014 + C00027	L-Glutamate + Oxygen + H2O <=> 2-Oxoglutarate + Ammonia + Hydrogen peroxide
R00251	C00002 + C01879 + 2 C00001 <=> C00008 + C00009 + C00025	ATP + 5-Oxoproline + 2 H2O <=> ADP + Orthophosphate + L-Glutamate
R00253	C00002 + C00025 + C00014 <=> C00008 + C00009 + C00064	ATP + L-Glutamate + Ammonia <=> ADP + Orthophosphate + L-Glutamine
R00254	C00025 + C00014 + C00011 <=> C05829 + C00001	L-Glutamate + Ammonia + CO2 <=> N-Carbamyl-L-glutamate + H2O
R00256	C00064 + C00001 <=> C00025 + C00014	L-Glutamine + H2O <=> L-Glutamate + Ammonia
R00257	C00002 + C00857 + C00064 + C00001 <=> C00020 + C00013 + C00003 + C00025	ATP + Deamino-NAD+ + L-Glutamine + H2O <=> AMP + Diphosphate + NAD+ + L-Glutamate
R00258	C00041 + C00026 <=> C00022 + C00025	L-Alanine + 2-Oxoglutarate <=> Pyruvate + L-Glutamate
R00259	C00024 + C00025 <=> C00010 + C00624	Acetyl-CoA + L-Glutamate <=> CoA + N-Acetyl-L-glutamate
R00260	C00025 <=> C00217	L-Glutamate <=> D-Glutamate
R00261	C00025 <=> C00334 + C00011	L-Glutamate <=> 4-Aminobutanoate + CO2
R00262	C03618 <=> C00025	L-threo-3-Methylaspartate <=> L-Glutamate
R00264	C00433 + C00006 + C00001 <=> C00026 + C00005 + C00080	2,5-Dioxopentanoate + NADP+ + H2O <=> 2-Oxoglutarate + NADPH + H+
R00265	C00026 + C00010 + C00006 <=> C00091 + C00011 + C00005 + C00080	2-Oxoglutarate + CoA + NADP+ <=> Succinyl-CoA + CO2 + NADPH + H+
R00267	C00311 + C00006 <=> C00026 + C00011 + C00005 + C00080	Isocitrate + NADP+ <=> 2-Oxoglutarate + CO2 + NADPH + H+
R00268	C05379 <=> C00026 + C00011	Oxalosuccinate <=> 2-Oxoglutarate + CO2
R00269	C00940 + C00001 <=> C00026 + C00014	2-Oxoglutaramate + H2O <=> 2-Oxoglutarate + Ammonia
R00270	C00026 + C00014 <=> C05572 + C00001	2-Oxoglutarate + Ammonia <=> 4-Oxoglutaramate + H2O
R00271	C00024 + C00001 + C00026 <=> C01251 + C00010	Acetyl-CoA + H2O + 2-Oxoglutarate <=> (R)-2-Hydroxybutane-1,2,4-tricarboxylate + CoA
R00272	C00026 <=> C00232 + C00011	2-Oxoglutarate <=> Succinate semialdehyde + CO2
R00273	C00209 + C00007 <=> C00027 + 2 C00011	Oxalate + Oxygen <=> Hydrogen peroxide + 2 CO2
R00274	C00027 + 2 C00051 <=> C00127 + 2 C00001	Hydrogen peroxide + 2 Glutathione <=> Glutathione disulfide + 2 H2O
R00275	2 C00704 + 2 C00080 <=> C00027 + C00007	2 O2.- + 2 H+ <=> Hydrogen peroxide + Oxygen
R00276	C00011 + C00027 <=> C00237 + C00001 + C00007	CO2 + Hydrogen peroxide <=> CO + H2O + Oxygen
R00277	C00647 + C00001 + C00007 <=> C00018 + C00014 + C00027	Pyridoxamine phosphate + H2O + Oxygen <=> Pyridoxal phosphate + Ammonia + Hydrogen peroxide
R00278	C00627 + C00007 <=> C00027 + C00018	Pyridoxine phosphate + Oxygen <=> Hydrogen peroxide + Pyridoxal phosphate
R00279	C00217 + C00001 + C00007 <=> C00026 + C00014 + C00027	D-Glutamate + H2O + Oxygen <=> 2-Oxoglutarate + Ammonia + Hydrogen peroxide
R00286	C00029 + C00001 + 2 C00003 <=> C00167 + 2 C00004 + 2 C00080	UDP-glucose + H2O + 2 NAD+ <=> UDP-glucuronate + 2 NADH + 2 H+
R00287	C00029 + C00001 <=> C00105 + C00103	UDP-glucose + H2O <=> UMP + D-Glucose 1-phosphate
R00289	C00075 + C00103 <=> C00013 + C00029	UTP + D-Glucose 1-phosphate <=> Diphosphate + UDP-glucose
R00291	C00029 <=> C00052	UDP-glucose <=> UDP-alpha-D-galactose
R00293	C00029 <=> C04089 + C00001	UDP-glucose <=> UDP-4-dehydro-6-deoxy-D-glucose + H2O
R00299	C00002 + C00031 <=> C00008 + C00092	ATP + D-Glucose <=> ADP + D-Glucose 6-phosphate
R00300	C00031 + C00003 <=> C00198 + C00004 + C00080	D-Glucose + NAD+ <=> D-Glucono-1,5-lactone + NADH + H+
R00301	C00031 + C00006 <=> C03107 + C00005 + C00080	D-Glucose + NADP+ <=> D-Glucono-1,4-lactone + NADPH + H+
R00302	C00031 + C00007 <=> C02779 + C00027	D-Glucose + Oxygen <=> 2-Dehydro-D-glucose + Hydrogen peroxide
R00303	C00092 + C00001 <=> C00031 + C00009	D-Glucose 6-phosphate + H2O <=> D-Glucose + Orthophosphate
R00304	C00103 + C00001 <=> C00031 + C00009	D-Glucose 1-phosphate + H2O <=> D-Glucose + Orthophosphate
R00306	C00185 + C00001 <=> 2 C00031	Cellobiose + H2O <=> 2 D-Glucose
R00307	C00031 <=> C00095	D-Glucose <=> D-Fructose
R00310	C02191 + C14818 <=> C00032 + 2 C00080	Protoporphyrin + Fe2+ <=> Heme + 2 H+
R00315	C00002 + C00033 <=> C00008 + C00227	ATP + Acetate <=> ADP + Acetyl phosphate
R00316	C00002 + C00033 <=> C00013 + C05993	ATP + Acetate <=> Diphosphate + Acetyl adenylate
R00317	C00227 + C00001 <=> C00033 + C00009	Acetyl phosphate + H2O <=> Acetate + Orthophosphate
R00318	C05682 + C00001 <=> C00033 + C00009	Phosphonoacetate + H2O <=> Acetate + Orthophosphate
R00319	C00186 + C00007 <=> C00033 + C00011 + C00001	(S)-Lactate + Oxygen <=> Acetate + CO2 + H2O
R00320	C00013 + C00033 <=> C00009 + C00227	Diphosphate + Acetate <=> Orthophosphate + Acetyl phosphate
R00321	C06244 + C00001 <=> C00033 + C00014	Acetamide + H2O <=> Acetate + Ammonia
R00322	C05993 + C00001 <=> C00020 + C00033	Acetyl adenylate + H2O <=> AMP + Acetate
R00324	C02132 + C00001 <=> C00033 + C00022	Acetylpyruvate + H2O <=> Acetate + Pyruvate
R00325	C02614 <=> C00033 + C00022	(S)-2-Methylmalate <=> Acetate + Pyruvate
R00327	C02655 + C00001 <=> C00031 + C00033	6-Acetyl-D-glucose + H2O <=> D-Glucose + Acetate
R00328	C00035 + C00001 <=> C00144 + C00009	GDP + H2O <=> GMP + Orthophosphate
R00330	C00002 + C00035 <=> C00008 + C00044	ATP + GDP <=> ADP + GTP
R00332	C00002 + C00144 <=> C00008 + C00035	ATP + GMP <=> ADP + GDP
R00335	C00044 + C00001 <=> C00035 + C00009	GTP + H2O <=> GDP + Orthophosphate
R00336	C01228 + C00001 <=> C00035 + C00013	Guanosine 3',5'-bis(diphosphate) + H2O <=> GDP + Diphosphate
R00337	C00394 + C00001 <=> C00035 + C00031	GDP-glucose + H2O <=> GDP + D-Glucose
R00338	C00036 + C00001 <=> C00209 + C00033	Oxaloacetate + H2O <=> Oxalate + Acetate
R00339	C00898 <=> C00036 + C00001	(R,R)-Tartaric acid <=> Oxaloacetate + H2O
R00340	C02107 <=> C00036 + C00001	(S,S)-Tartaric acid <=> Oxaloacetate + H2O
R00341	C00002 + C00036 <=> C00008 + C00074 + C00011	ATP + Oxaloacetate <=> ADP + Phosphoenolpyruvate + CO2
R00342	C00149 + C00003 <=> C00036 + C00004 + C00080	(S)-Malate + NAD+ <=> Oxaloacetate + NADH + H+
R00343	C00149 + C00006 <=> C00036 + C00005 + C00080	(S)-Malate + NADP+ <=> Oxaloacetate + NADPH + H+
R00344	C00002 + C00022 + C00288 <=> C00008 + C00009 + C00036	ATP + Pyruvate + HCO3- <=> ADP + Orthophosphate + Oxaloacetate
R00345	C00009 + C00036 <=> C00001 + C00074 + C00011	Orthophosphate + Oxaloacetate <=> H2O + Phosphoenolpyruvate + CO2
R00346	C00013 + C00036 <=> C00009 + C00074 + C00011	Diphosphate + Oxaloacetate <=> Orthophosphate + Phosphoenolpyruvate + CO2
R00347	C03961 <=> C00036 + C00014	erythro-3-Hydroxy-Ls-aspartate <=> Oxaloacetate + Ammonia
R00348	C02362 + C00001 <=> C00036 + C00014	2-Oxosuccinamate + H2O <=> Oxaloacetate + Ammonia
R00350	C04115 <=> C00036 + C00022	4-Carboxy-4-hydroxy-2-oxoadipate <=> Oxaloacetate + Pyruvate
R00351	C00158 + C00010 <=> C00024 + C00001 + C00036	Citrate + CoA <=> Acetyl-CoA + H2O + Oxaloacetate
R00352	C00002 + C00158 + C00010 <=> C00008 + C00009 + C00024 + C00036	ATP + Citrate + CoA <=> ADP + Orthophosphate + Acetyl-CoA + Oxaloacetate
R00353	C00083 + C00022 <=> C00024 + C00036	Malonyl-CoA + Pyruvate <=> Acetyl-CoA + Oxaloacetate
R00354	C00566 <=> C00024 + C00036	(3S)-Citryl-CoA <=> Acetyl-CoA + Oxaloacetate
R00355	C00049 + C00026 <=> C00036 + C00025	L-Aspartate + 2-Oxoglutarate <=> Oxaloacetate + L-Glutamate
R00357	C00049 + C00001 + C00007 <=> C00036 + C00014 + C00027	L-Aspartate + H2O + Oxygen <=> Oxaloacetate + Ammonia + Hydrogen peroxide
R00359	C00402 + C00001 + C00007 <=> C00036 + C00014 + C00027	D-Aspartate + H2O + Oxygen <=> Oxaloacetate + Ammonia + Hydrogen peroxide
R00360	C00149 + C00007 <=> C00036 + C00027	(S)-Malate + Oxygen <=> Oxaloacetate + Hydrogen peroxide
R00362	C00158 <=> C00033 + C00036	Citrate <=> Acetate + Oxaloacetate
R00363	C00036 <=> C03981	Oxaloacetate <=> 2-Hydroxyethylenedicarboxylate
R00365	C00037 + C00001 + C00003 <=> C00048 + C00014 + C00004 + C00080	Glycine + H2O + NAD+ <=> Glyoxylate + Ammonia + NADH + H+
R00366	C00037 + C00001 + C00007 <=> C00048 + C00014 + C00027	Glycine + H2O + Oxygen <=> Glyoxylate + Ammonia + Hydrogen peroxide
R00367	C00019 + C00037 <=> C00021 + C00213	S-Adenosyl-L-methionine + Glycine <=> S-Adenosyl-L-homocysteine + Sarcosine
R00368	C03790 + C00003 + C00001 <=> C00037 + C00022 + C00004 + C00080	N-(Carboxymethyl)-D-alanine + NAD+ + H2O <=> Glycine + Pyruvate + NADH + H+
R00369	C00041 + C00048 <=> C00022 + C00037	L-Alanine + Glyoxylate <=> Pyruvate + Glycine
R00371	C00024 + C00037 <=> C00010 + C03508	Acetyl-CoA + Glycine <=> CoA + L-2-Amino-3-oxobutanoic acid
R00372	C00037 + C00026 <=> C00048 + C00025	Glycine + 2-Oxoglutarate <=> Glyoxylate + L-Glutamate
R00373	C00037 + C00036 <=> C00048 + C00049	Glycine + Oxaloacetate <=> Glyoxylate + L-Aspartate
R00396	C00041 + C00003 + C00001 <=> C00022 + C00014 + C00004 + C00080	L-Alanine + NAD+ + H2O <=> Pyruvate + Ammonia + NADH + H+
R00397	C00049 <=> C00041 + C00011	L-Aspartate <=> L-Alanine + CO2
R00398	C03210 + C00003 + C00001 <=> C00041 + C00022 + C00004 + C00080	Alanopine + NAD+ + H2O <=> L-Alanine + Pyruvate + NADH + H+
R00399	C00133 + C00024 <=> C03341 + C00010	D-Alanine + Acetyl-CoA <=> 2-Amino-4-oxopentanoic acid + CoA
R00400	C00041 + C00036 <=> C00022 + C00049	L-Alanine + Oxaloacetate <=> Pyruvate + L-Aspartate
R00401	C00041 <=> C00133	L-Alanine <=> D-Alanine
R00402	C00042 + C00003 <=> C00122 + C00004 + C00080	Succinate + NAD+ <=> Fumarate + NADH + H+
R00405	C00002 + C00042 + C00010 <=> C00008 + C00009 + C00091	ATP + Succinate + CoA <=> ADP + Orthophosphate + Succinyl-CoA
R00406	C00091 + C00149 <=> C00042 + C04348	Succinyl-CoA + (S)-Malate <=> Succinate + L-Malyl-CoA
R00407	C00091 + C00001 <=> C00010 + C00042	Succinyl-CoA + H2O <=> CoA + Succinate
R00408	C00042 + C00016 <=> C01352 + C00122	Succinate + FAD <=> FADH2 + Fumarate
R00409	C04593 <=> C00022 + C00042	(2S,3R)-3-Hydroxybutane-1,2,3-tricarboxylate <=> Pyruvate + Succinate
R00410	C00091 + C00164 <=> C00042 + C00332	Succinyl-CoA + Acetoacetate <=> Succinate + Acetoacetyl-CoA
R00411	C05931 + C00001 <=> C00025 + C00042	N-Succinyl-L-glutamate + H2O <=> L-Glutamate + Succinate
R00414	C00043 + C00001 <=> C00645 + C00015	UDP-N-acetyl-alpha-D-glucosamine + H2O <=> N-Acetyl-D-mannosamine + UDP
R00416	C00075 + C04501 <=> C00013 + C00043	UTP + N-Acetyl-alpha-D-glucosamine 1-phosphate <=> Diphosphate + UDP-N-acetyl-alpha-D-glucosamine
R00418	C00043 <=> C00203	UDP-N-acetyl-alpha-D-glucosamine <=> UDP-N-acetyl-D-galactosamine
R00420	C00043 <=> C01170	UDP-N-acetyl-alpha-D-glucosamine <=> UDP-N-acetyl-D-mannosamine
R00421	C00043 + 2 C00003 + C00001 <=> C04573 + 2 C00004 + 2 C00080	UDP-N-acetyl-alpha-D-glucosamine + 2 NAD+ + H2O <=> UDP-N-acetyl-2-amino-2-deoxy-D-glucuronate + 2 NADH + 2 H+
R00424	C00044 + C00001 <=> C04895 + C00058	GTP + H2O <=> 7,8-Dihydroneopterin 3'-triphosphate + Formate
R00425	C00044 + 3 C00001 <=> C00058 + C01304 + C00013	GTP + 3 H2O <=> Formate + 2,5-Diamino-6-(5-phospho-D-ribosylamino)pyrimidin-4(3H)-one + Diphosphate
R00426	C00044 + C00001 <=> C00144 + C00013	GTP + H2O <=> GMP + Diphosphate
R00428	C00044 + C00001 <=> C05922	GTP + H2O <=> Formamidopyrimidine nucleoside triphosphate
R00429	C00002 + C00044 <=> C00020 + C04494	ATP + GTP <=> AMP + Guanosine 3'-diphosphate 5'-triphosphate
R00430	C00044 + C00022 <=> C00035 + C00074	GTP + Pyruvate <=> GDP + Phosphoenolpyruvate
R00431	C00044 + C00036 <=> C00035 + C00074 + C00011	GTP + Oxaloacetate <=> GDP + Phosphoenolpyruvate + CO2
R00432	C00044 + C00042 + C00010 <=> C00035 + C00009 + C00091	GTP + Succinate + CoA <=> GDP + Orthophosphate + Succinyl-CoA
R00434	C00044 <=> C00942 + C00013	GTP <=> 3',5'-Cyclic GMP + Diphosphate
R00445	C00047 + C00003 <=> C04092 + C00014 + C00004 + C00080	L-Lysine + NAD+ <=> Delta1-Piperideine-2-carboxylate + Ammonia + NADH + H+
R00446	C00047 + C00003 + C00001 <=> C04076 + C00004 + C00014 + C00080	L-Lysine + NAD+ + H2O <=> L-2-Aminoadipate 6-semialdehyde + NADH + Ammonia + H+
R00447	C00047 + C00007 + C00001 <=> C03239 + C00014 + C00027	L-Lysine + Oxygen + H2O <=> 6-Amino-2-oxohexanoate + Ammonia + Hydrogen peroxide
R00448	C00047 + C00007 + C00005 + C00080 <=> C01028 + C00006 + C00001	L-Lysine + Oxygen + NADPH + H+ <=> N6-Hydroxy-L-lysine + NADP+ + H2O
R00449	C00047 + C00007 <=> C00990 + C00011 + C00001	L-Lysine + Oxygen <=> 5-Aminopentanamide + CO2 + H2O
R00451	C00680 <=> C00047 + C00011	meso-2,6-Diaminoheptanedioate <=> L-Lysine + CO2
R00452	C04020 + C00006 + C00001 <=> C00047 + C00022 + C00005 + C00080	D-Lysopine + NADP+ + H2O <=> L-Lysine + Pyruvate + NADPH + H+
R00453	C00047 + C00022 <=> C04076 + C00041	L-Lysine + Pyruvate <=> L-2-Aminoadipate 6-semialdehyde + L-Alanine
R00454	C00047 + C00024 <=> C02727 + C00010	L-Lysine + Acetyl-CoA <=> N6-Acetyl-L-lysine + CoA
R00457	C00047 + C00026 <=> C04076 + C00025	L-Lysine + 2-Oxoglutarate <=> L-2-Aminoadipate 6-semialdehyde + L-Glutamate
R00458	C02727 + C00001 <=> C00033 + C00047	N6-Acetyl-L-lysine + H2O <=> Acetate + L-Lysine
R00460	C00047 <=> C00739	L-Lysine <=> D-Lysine
R00461	C00047 <=> C01142	L-Lysine <=> (3S)-3,6-Diaminohexanoate
R00462	C00047 <=> C01672 + C00011	L-Lysine <=> Cadaverine + CO2
R00463	C02837 + C00001 <=> C00047	L-Lysine 1,6-lactam + H2O <=> L-Lysine
R00465	C00160 + C00006 <=> C00048 + C00005 + C00080	Glycolate + NADP+ <=> Glyoxylate + NADPH + H+
R00466	C00048 + C00007 + C00001 <=> C00209 + C00027	Glyoxylate + Oxygen + H2O <=> Oxalate + Hydrogen peroxide
R00468	C00048 + C00010 + C00006 <=> C00313 + C00005 + C00080	Glyoxylate + CoA + NADP+ <=> Oxalyl-CoA + NADPH + H+
R00469	C00603 + C00001 <=> C00048 + 2 C00014 + C00011	(S)-Ureidoglycolate + H2O <=> Glyoxylate + 2 Ammonia + CO2
R00470	C01127 <=> C00022 + C00048	4-Hydroxy-2-oxoglutarate <=> Pyruvate + Glyoxylate
R00471	C05946 <=> C00022 + C00048	(4R)-4-Hydroxy-2-oxoglutarate <=> Pyruvate + Glyoxylate
R00472	C00149 + C00010 <=> C00024 + C00001 + C00048	(S)-Malate + CoA <=> Acetyl-CoA + H2O + Glyoxylate
R00473	C04348 <=> C00024 + C00048	L-Malyl-CoA <=> Acetyl-CoA + Glyoxylate
R00474	C03217 + C00011 <=> C00026 + C00048	2-Hydroxy-3-oxoadipate + CO2 <=> 2-Oxoglutarate + Glyoxylate
R00475	C00160 + C00007 <=> C00048 + C00027	Glycolate + Oxygen <=> Glyoxylate + Hydrogen peroxide
R00477	C01990 <=> C00036 + C00048	3-Oxalomalate <=> Oxaloacetate + Glyoxylate
R00478	C03961 <=> C00037 + C00048	erythro-3-Hydroxy-Ls-aspartate <=> Glycine + Glyoxylate
R00479	C00311 <=> C00042 + C00048	Isocitrate <=> Succinate + Glyoxylate
R00480	C00002 + C00049 <=> C00008 + C03082	ATP + L-Aspartate <=> ADP + 4-Phospho-L-aspartate
R00481	C00049 + C00007 <=> C05840 + C00027	L-Aspartate + Oxygen <=> Iminoaspartate + Hydrogen peroxide
R00482	C00002 + C00049 + C00014 <=> C00008 + C00009 + C00152	ATP + L-Aspartate + Ammonia <=> ADP + Orthophosphate + L-Asparagine
R00483	C00002 + C00049 + C00014 <=> C00020 + C00013 + C00152	ATP + L-Aspartate + Ammonia <=> AMP + Diphosphate + L-Asparagine
R00484	C00438 + C00001 <=> C00049 + C00011 + C00014	N-Carbamoyl-L-aspartate + H2O <=> L-Aspartate + CO2 + Ammonia
R00485	C00152 + C00001 <=> C00049 + C00014	L-Asparagine + H2O <=> L-Aspartate + Ammonia
R00486	C02512 + 2 C00001 <=> C00049 + C00014	3-Cyano-L-alanine + 2 H2O <=> L-Aspartate + Ammonia
R00487	C00024 + C00049 <=> C00010 + C01042	Acetyl-CoA + L-Aspartate <=> CoA + N-Acetyl-L-aspartate
R00488	C01042 + C00001 <=> C00033 + C00049	N-Acetyl-L-aspartate + H2O <=> Acetate + L-Aspartate
R00489	C00049 <=> C00099 + C00011	L-Aspartate <=> beta-Alanine + CO2
R00490	C00049 <=> C00122 + C00014	L-Aspartate <=> Fumarate + Ammonia
R00491	C00049 <=> C00402	L-Aspartate <=> D-Aspartate
R00494	C00051 + C00001 <=> C01419 + C00025	Glutathione + H2O <=> Cys-Gly + L-Glutamate
R00497	C00002 + C00669 + C00037 <=> C00008 + C00009 + C00051	ATP + gamma-L-Glutamyl-L-cysteine + Glycine <=> ADP + Orthophosphate + Glutathione
R00499	C03174 + C00001 <=> C00051 + C00042	S-Succinylglutathione + H2O <=> Glutathione + Succinate
R00501	C00052 + 2 C00003 + C00001 <=> C00617 + 2 C00004 + 2 C00080	UDP-alpha-D-galactose + 2 NAD+ + H2O <=> UDP-D-galacturonate + 2 NADH + 2 H+
R00502	C00075 + C00446 <=> C00013 + C00052	UTP + alpha-D-Galactose 1-phosphate <=> Diphosphate + UDP-alpha-D-galactose
R00503	C00052 + C00031 <=> C00015 + C00243	UDP-alpha-D-galactose + D-Glucose <=> UDP + Lactose
R00504	C00052 + C00043 <=> C00105 + C04739	UDP-alpha-D-galactose + UDP-N-acetyl-alpha-D-glucosamine <=> UMP + UDP-N-acetyl-6-(alpha-D-galactose-1-phospho)-alpha-D-glucosamine
R00505	C00052 <=> C03733	UDP-alpha-D-galactose <=> UDP-alpha-D-galactofuranose
R00507	C00053 + C00001 <=> C00059 + C00054	3'-Phosphoadenylyl sulfate + H2O <=> Sulfate + Adenosine 3',5'-bisphosphate
R00508	C00053 + C00001 <=> C00224 + C00009	3'-Phosphoadenylyl sulfate + H2O <=> Adenylyl sulfate + Orthophosphate
R00509	C00002 + C00224 <=> C00008 + C00053	ATP + Adenylyl sulfate <=> ADP + 3'-Phosphoadenylyl sulfate
R00510	C00055 + C00001 <=> C00380 + C00117	CMP + H2O <=> Cytosine + D-Ribose 5-phosphate
R00511	C00055 + C00001 <=> C00475 + C00009	CMP + H2O <=> Cytidine + Orthophosphate
R00512	C00002 + C00055 <=> C00008 + C00112	ATP + CMP <=> ADP + CDP
R00513	C00002 + C00475 <=> C00008 + C00055	ATP + Cytidine <=> ADP + CMP
R00514	C00112 + C00001 <=> C00055 + C00009	CDP + H2O <=> CMP + Orthophosphate
R00515	C00063 + C00001 <=> C00055 + C00013	CTP + H2O <=> CMP + Diphosphate
R00516	C00075 + C00475 <=> C00015 + C00055	UTP + Cytidine <=> UDP + CMP
R00517	C00044 + C00475 <=> C00035 + C00055	GTP + Cytidine <=> GDP + CMP
R00518	C00002 + C00058 <=> C00008 + C02405	ATP + Formate <=> ADP + Formyl phosphate
R00519	C00058 + C00003 <=> C00080 + C00011 + C00004	Formate + NAD+ <=> H+ + CO2 + NADH
R00521	C00798 + C00001 <=> C00010 + C00058	Formyl-CoA + H2O <=> CoA + Formate
R00522	C00209 <=> C00058 + C00011	Oxalate <=> Formate + CO2
R00524	C00488 + C00001 <=> C00058 + C00014	Formamide + H2O <=> Formate + Ammonia
R00525	C01045 + C00001 <=> C00058 + C00025	N-Formyl-L-glutamate + H2O <=> Formate + L-Glutamate
R00526	C01044 + C00001 <=> C00058 + C00049	N-Formyl-L-aspartate + H2O <=> Formate + L-Aspartate
R00527	C01031 + C00001 <=> C00058 + C00051	S-Formylglutathione + H2O <=> Formate + Glutathione
R00529	C00002 + C00059 <=> C00013 + C00224	ATP + Sulfate <=> Diphosphate + Adenylyl sulfate
R00530	C00008 + C00059 <=> C00009 + C00224	ADP + Sulfate <=> Orthophosphate + Adenylyl sulfate
R00531	C00224 + C00001 <=> C00020 + C00059	Adenylyl sulfate + H2O <=> AMP + Sulfate
R00532	C02703 + C00001 <=> C00022 + C00014 + C00059	L-Serine O-sulfate + H2O <=> Pyruvate + Ammonia + Sulfate
R00533	C00094 + C00007 + C00001 <=> C00059 + C00027	Sulfite + Oxygen + H2O <=> Sulfate + Hydrogen peroxide
R00534	C02827 + C00001 <=> C00031 + C00059	D-Glucose 6-sulfate + H2O <=> D-Glucose + Sulfate
R00535	C00053 + C00951 <=> C00054 + C08357	3'-Phosphoadenylyl sulfate + Estradiol-17beta <=> Adenosine 3',5'-bisphosphate + Estradiol-17beta 3-sulfate
R00536	C00053 + C05299 <=> C00054 + C08358	3'-Phosphoadenylyl sulfate + 2-Methoxyestrone <=> Adenosine 3',5'-bisphosphate + 2-Methoxyestrone 3-sulfate
R00537	C00053 + C05302 <=> C00054 + C08359	3'-Phosphoadenylyl sulfate + 2-Methoxy-17beta-estradiol <=> Adenosine 3',5'-bisphosphate + 2-Methoxyestradiol-17beta 3-sulfate
R00548	C00061 + C00001 <=> C00255 + C00009	FMN + H2O <=> Riboflavin + Orthophosphate
R00549	C00002 + C00255 <=> C00008 + C00061	ATP + Riboflavin <=> ADP + FMN
R00550	C00103 + C00255 <=> C00031 + C00061	D-Glucose 1-phosphate + Riboflavin <=> D-Glucose + FMN
R00551	C00062 + C00001 <=> C00077 + C00086	L-Arginine + H2O <=> L-Ornithine + Urea
R00552	C00062 + C00001 <=> C00327 + C00014	L-Arginine + H2O <=> L-Citrulline + Ammonia
R00554	C00002 + C00062 <=> C00008 + C05945	ATP + L-Arginine <=> ADP + L-Arginine phosphate
R00557	2 C00062 + 4 C00007 + 3 C00005 + 3 C00080 <=> 2 C00533 + 2 C00327 + 3 C00006 + 4 C00001	2 L-Arginine + 4 Oxygen + 3 NADPH + 3 H+ <=> 2 Nitric oxide + 2 L-Citrulline + 3 NADP+ + 4 H2O
R00558	C00062 + C00007 + C00005 + C00080 <=> C05933 + C00006 + C00001	L-Arginine + Oxygen + NADPH + H+ <=> N(omega)-Hydroxyarginine + NADP+ + H2O
R00559	C00062 + C00007 <=> C03078 + C00011 + C00001	L-Arginine + Oxygen <=> 4-Guanidinobutanamide + CO2 + H2O
R00562	C04137 + C00003 + C00001 <=> C00062 + C00022 + C00004 + C00080	D-Octopine + NAD+ + H2O <=> L-Arginine + Pyruvate + NADH + H+
R00563	C01682 + C00006 + C00001 <=> C00062 + C00026 + C00005 + C00080	Nopaline + NADP+ + H2O <=> L-Arginine + 2-Oxoglutarate + NADPH + H+
R00565	C00062 + C00037 <=> C00077 + C00581	L-Arginine + Glycine <=> L-Ornithine + Guanidinoacetate
R00566	C00062 <=> C00179 + C00011	L-Arginine <=> Agmatine + CO2
R00567	C00062 <=> C00792	L-Arginine <=> D-Arginine
R00568	C00063 + C00001 <=> C00075 + C00014	CTP + H2O <=> UTP + Ammonia
R00569	C00063 + C00001 <=> C00112 + C00009	CTP + H2O <=> CDP + Orthophosphate
R00570	C00002 + C00112 <=> C00008 + C00063	ATP + CDP <=> ADP + CTP
R00571	C00002 + C00075 + C00014 <=> C00008 + C00009 + C00063	ATP + UTP + Ammonia <=> ADP + Orthophosphate + CTP
R00572	C00063 + C00022 <=> C00112 + C00074	CTP + Pyruvate <=> CDP + Phosphoenolpyruvate
R00573	C00002 + C00075 + C00064 + C00001 <=> C00008 + C00009 + C00063 + C00025	ATP + UTP + L-Glutamine + H2O <=> ADP + Orthophosphate + CTP + L-Glutamate
R00574	C00063 <=> C00941 + C00013	CTP <=> 3',5'-Cyclic CMP + Diphosphate
R00575	2 C00002 + C00064 + C00288 + C00001 <=> 2 C00008 + C00009 + C00025 + C00169	2 ATP + L-Glutamine + HCO3- + H2O <=> 2 ADP + Orthophosphate + L-Glutamate + Carbamoyl phosphate
R00576	C00064 + C00022 <=> C00940 + C00041	L-Glutamine + Pyruvate <=> 2-Oxoglutaramate + L-Alanine
R00578	C00002 + C00049 + C00064 + C00001 <=> C00020 + C00013 + C00152 + C00025	ATP + L-Aspartate + L-Glutamine + H2O <=> AMP + Diphosphate + L-Asparagine + L-Glutamate
R00579	C00064 <=> C00819	L-Glutamine <=> D-Glutamine
R00581	C00065 + C00003 + C00001 <=> C00168 + C00014 + C00004 + C00080	L-Serine + NAD+ + H2O <=> Hydroxypyruvate + Ammonia + NADH + H+
R00582	C01005 + C00001 <=> C00065 + C00009	O-Phospho-L-serine + H2O <=> L-Serine + Orthophosphate
R00584	C00013 + C00065 <=> C00009 + C01005	Diphosphate + L-Serine <=> Orthophosphate + O-Phospho-L-serine
R00585	C00065 + C00022 <=> C00168 + C00041	L-Serine + Pyruvate <=> Hydroxypyruvate + L-Alanine
R00586	C00065 + C00024 <=> C00979 + C00010	L-Serine + Acetyl-CoA <=> O-Acetyl-L-serine + CoA
R00588	C00065 + C00048 <=> C00168 + C00037	L-Serine + Glyoxylate <=> Hydroxypyruvate + Glycine
R00589	C00065 <=> C00740	L-Serine <=> D-Serine
R00590	C00065 <=> C02218 + C00001	L-Serine <=> Dehydroalanine + H2O
R00602	C00132 + C00027 <=> C00067 + 2 C00001	Methanol + Hydrogen peroxide <=> Formaldehyde + 2 H2O
R00603	C02271 + C00001 <=> C00067 + 2 C01327	Dichloromethane + H2O <=> Formaldehyde + 2 Hydrochloric acid
R00604	C00067 + C00003 + C00001 <=> C00058 + C00004 + C00080	Formaldehyde + NAD+ + H2O <=> Formate + NADH + H+
R00605	C00132 + C00003 <=> C00067 + C00004 + C00080	Methanol + NAD+ <=> Formaldehyde + NADH + H+
R00608	C00132 + C00007 <=> C00067 + C00027	Methanol + Oxygen <=> Formaldehyde + Hydrogen peroxide
R00610	C00213 + C00001 + C00007 <=> C00037 + C00067 + C00027	Sarcosine + H2O + Oxygen <=> Glycine + Formaldehyde + Hydrogen peroxide
R00612	C02728 + C00001 + C00007 <=> C00047 + C00067 + C00027	N6-Methyl-L-lysine + H2O + Oxygen <=> L-Lysine + Formaldehyde + Hydrogen peroxide
R00614	2 C00067 + C00001 <=> C00058 + C00132	2 Formaldehyde + H2O <=> Formate + Methanol
R00615	C00068 + C00001 <=> C01081 + C00009	Thiamin diphosphate + H2O <=> Thiamin monophosphate + Orthophosphate
R00616	C00002 + C00068 <=> C00008 + C03028	ATP + Thiamin diphosphate <=> ADP + Thiamin triphosphate
R00617	C00002 + C01081 <=> C00008 + C00068	ATP + Thiamin monophosphate <=> ADP + Thiamin diphosphate
R00618	C03028 + C00001 <=> C00068 + C00009	Thiamin triphosphate + H2O <=> Thiamin diphosphate + Orthophosphate
R00619	C00002 + C00378 <=> C00020 + C00068	ATP + Thiamine <=> AMP + Thiamin diphosphate
R00621	C00026 + C00068 <=> C05381 + C00011	2-Oxoglutarate + Thiamin diphosphate <=> 3-Carboxy-1-hydroxypropyl-ThPP + CO2
R00643	C01115 + C00007 <=> C00072 + C00027	L-Galactono-1,4-lactone + Oxygen <=> Ascorbate + Hydrogen peroxide
R00644	C00072 + C00027 <=> C05422 + 2 C00001	Ascorbate + Hydrogen peroxide <=> Dehydroascorbate + 2 H2O
R00646	C00072 + C00007 + C00001 <=> C01620 + C00209	Ascorbate + Oxygen + H2O <=> Threonate + Oxalate
R00647	C00072 <=> C03289	Ascorbate <=> L-xylo-Hexulonolactone
R00648	C00073 + C00001 + C00007 <=> C01180 + C00014 + C00027	L-Methionine + H2O + Oxygen <=> 4-Methylthio-2-oxobutanoic acid + Ammonia + Hydrogen peroxide
R00649	C00019 + C00073 <=> C00021 + C03172	S-Adenosyl-L-methionine + L-Methionine <=> S-Adenosyl-L-homocysteine + S-Methyl-L-methionine
R00650	C00019 + C00155 <=> C00021 + C00073	S-Adenosyl-L-methionine + L-Homocysteine <=> S-Adenosyl-L-homocysteine + L-Methionine
R00651	C01077 + C00409 <=> C00073 + C00033	O-Acetyl-L-homoserine + Methanethiol <=> L-Methionine + Acetate
R00652	C00073 + C00048 <=> C01180 + C00037	L-Methionine + Glyoxylate <=> 4-Methylthio-2-oxobutanoic acid + Glycine
R00653	C03145 + C00001 <=> C00058 + C00073	N-Formylmethionine + H2O <=> Formate + L-Methionine
R00654	C00073 + C00001 <=> C00409 + C00014 + C00109	L-Methionine + H2O <=> Methanethiol + Ammonia + 2-Oxobutanoate
R00655	C00073 <=> C00855	L-Methionine <=> D-Methionine
R00656	C00073 <=> C03354 + C00011	L-Methionine <=> 3-Methylthiopropanamine + CO2
R00658	C00631 <=> C00074 + C00001	2-Phospho-D-glycerate <=> Phosphoenolpyruvate + H2O
R00659	C00075 + C00022 <=> C00015 + C00074	UTP + Pyruvate <=> UDP + Phosphoenolpyruvate
R00660	C00074 + C00043 <=> C04631 + C00009	Phosphoenolpyruvate + UDP-N-acetyl-alpha-D-glucosamine <=> UDP-N-acetyl-3-(1-carboxyvinyl)-D-glucosamine + Orthophosphate
R00661	C00074 <=> C02798	Phosphoenolpyruvate <=> 3-Phosphonopyruvate
R00662	C00075 + C00001 <=> C00105 + C00013	UTP + H2O <=> UMP + Diphosphate
R00664	2 C00512 + C00077 <=> 2 C00010 + C03712	2 Benzoyl-CoA + L-Ornithine <=> 2 CoA + N2,N5-Dibenzoyl-L-ornithine
R00665	C00327 + C00001 <=> C00077 + C00011 + C00014	L-Citrulline + H2O <=> L-Ornithine + CO2 + Ammonia
R00666	C04210 + C00006 + C00001 <=> C00077 + C00022 + C00005 + C00080	N5-(L-1-Carboxyethyl)-L-ornithine + NADP+ + H2O <=> L-Ornithine + Pyruvate + NADPH + H+
R00667	C00077 + C00026 <=> C01165 + C00025	L-Ornithine + 2-Oxoglutarate <=> L-Glutamate 5-semialdehyde + L-Glutamate
R00668	C00077 + C00026 <=> C04322 + C00025 + C00001	L-Ornithine + 2-Oxoglutarate <=> Delta1-Pyrroline-5-carboxylate + L-Glutamate + H2O
R00669	C00437 + C00001 <=> C00033 + C00077	N-Acetylornithine + H2O <=> Acetate + L-Ornithine
R00670	C00077 <=> C00134 + C00011	L-Ornithine <=> Putrescine + CO2
R00671	C00077 <=> C00148 + C00014	L-Ornithine <=> L-Proline + Ammonia
R00672	C00077 <=> C00515	L-Ornithine <=> D-Ornithine
R00673	C00078 + C00001 <=> C00463 + C00022 + C00014	L-Tryptophan + H2O <=> Indole + Pyruvate + Ammonia
R00674	C00065 + C00463 <=> C00078 + C00001	L-Serine + Indole <=> L-Tryptophan + H2O
R00675	C00078 + C00003 + C00001 <=> C00331 + C00014 + C00004 + C00080	L-Tryptophan + NAD+ + H2O <=> Indolepyruvate + Ammonia + NADH + H+
R00676	C00078 + C00006 + C00001 <=> C00331 + C00014 + C00005 + C00080	L-Tryptophan + NADP+ + H2O <=> Indolepyruvate + Ammonia + NADPH + H+
R00677	C00078 + C00001 + C00007 <=> C00331 + C00014 + C00027	L-Tryptophan + H2O + Oxygen <=> Indolepyruvate + Ammonia + Hydrogen peroxide
R00678	C00078 + C00007 <=> C02700	L-Tryptophan + Oxygen <=> L-Formylkynurenine
R00679	C00078 + C00007 <=> C02693 + C00011 + C00001	L-Tryptophan + Oxygen <=> (Indol-3-yl)acetamide + CO2 + H2O
R00681	C00078 + C00007 <=> C03230 + C00014 + C00011	L-Tryptophan + Oxygen <=> (Indol-3-yl)glycolaldehyde + Ammonia + CO2
R00682	C00977 + C00001 <=> C00078 + C00014	L-Tryptophanamide + H2O <=> L-Tryptophan + Ammonia
R00683	C00019 + C00078 <=> C00021 + C02983	S-Adenosyl-L-methionine + L-Tryptophan <=> S-Adenosyl-L-homocysteine + Abrine
R00684	C00078 + C00026 <=> C00331 + C00025	L-Tryptophan + 2-Oxoglutarate <=> Indolepyruvate + L-Glutamate
R00685	C00078 <=> C00398 + C00011	L-Tryptophan <=> Tryptamine + CO2
R00686	C00002 + C00079 + C00001 <=> C00020 + C00013 + C02265	ATP + L-Phenylalanine + H2O <=> AMP + Diphosphate + D-Phenylalanine
R00688	C00079 + C00001 + C00003 <=> C00166 + C00014 + C00004 + C00080	L-Phenylalanine + H2O + NAD+ <=> Phenylpyruvate + Ammonia + NADH + H+
R00689	C00079 + C00001 + C00007 <=> C00166 + C00014 + C00027	L-Phenylalanine + H2O + Oxygen <=> Phenylpyruvate + Ammonia + Hydrogen peroxide
R00690	C00079 + C00007 <=> C02505 + C00011 + C00001	L-Phenylalanine + Oxygen <=> 2-Phenylacetamide + CO2 + H2O
R00691	C00826 <=> C00079 + C00001 + C00011	L-Arogenate <=> L-Phenylalanine + H2O + CO2
R00692	C00079 + C00022 <=> C00166 + C00041	L-Phenylalanine + Pyruvate <=> Phenylpyruvate + L-Alanine
R00693	C00024 + C00079 <=> C00010 + C03519	Acetyl-CoA + L-Phenylalanine <=> CoA + N-Acetyl-L-phenylalanine
R00694	C00079 + C00026 <=> C00166 + C00025	L-Phenylalanine + 2-Oxoglutarate <=> Phenylpyruvate + L-Glutamate
R00695	C00049 + C00166 <=> C00036 + C00079	L-Aspartate + Phenylpyruvate <=> Oxaloacetate + L-Phenylalanine
R00697	C00079 <=> C00423 + C00014	L-Phenylalanine <=> trans-Cinnamate + Ammonia
R00699	C00079 <=> C05332 + C00011	L-Phenylalanine <=> Phenethylamine + CO2
R00700	C00282 + C00003 <=> C00004 + C00080	Hydrogen + NAD+ <=> NADH + H+
R00702	2 C00448 <=> C00013 + C03428	2 trans,trans-Farnesyl diphosphate <=> Diphosphate + Presqualene diphosphate
R00703	C00186 + C00003 <=> C00022 + C00004 + C00080	(S)-Lactate + NAD+ <=> Pyruvate + NADH + H+
R00704	C00256 + C00003 <=> C00022 + C00004 + C00080	(R)-Lactate + NAD+ <=> Pyruvate + NADH + H+
R00705	C00222 + C00010 + C00003 <=> C00024 + C00011 + C00004 + C00080	3-Oxopropanoate + CoA + NAD+ <=> Acetyl-CoA + CO2 + NADH + H+
R00706	C00222 + C00010 + C00006 <=> C00024 + C00011 + C00005 + C00080	3-Oxopropanoate + CoA + NADP+ <=> Acetyl-CoA + CO2 + NADPH + H+
R00707	C03912 + C00003 + 2 C00001 <=> C00025 + C00004 + C00080	(S)-1-Pyrroline-5-carboxylate + NAD+ + 2 H2O <=> L-Glutamate + NADH + H+
R00708	C03912 + C00006 + 2 C00001 <=> C00025 + C00005 + C00080	(S)-1-Pyrroline-5-carboxylate + NADP+ + 2 H2O <=> L-Glutamate + NADPH + H+
R00709	C00311 + C00003 <=> C00026 + C00011 + C00004 + C00080	Isocitrate + NAD+ <=> 2-Oxoglutarate + CO2 + NADH + H+
R00710	C00084 + C00003 + C00001 <=> C00033 + C00004 + C00080	Acetaldehyde + NAD+ + H2O <=> Acetate + NADH + H+
R00711	C00084 + C00006 + C00001 <=> C00033 + C00005 + C00080	Acetaldehyde + NADP+ + H2O <=> Acetate + NADPH + H+
R00713	C00232 + C00003 + C00001 <=> C00042 + C00004 + C00080	Succinate semialdehyde + NAD+ + H2O <=> Succinate + NADH + H+
R00714	C00232 + C00006 + C00001 <=> C00042 + C00005 + C00080	Succinate semialdehyde + NADP+ + H2O <=> Succinate + NADPH + H+
R00715	C00449 + C00003 + C00001 <=> C00047 + C00026 + C00004 + C00080	N6-(L-1,3-Dicarboxypropyl)-L-lysine + NAD+ + H2O <=> L-Lysine + 2-Oxoglutarate + NADH + H+
R00716	C00449 + C00006 + C00001 <=> C00047 + C00026 + C00005 + C00080	N6-(L-1,3-Dicarboxypropyl)-L-lysine + NADP+ + H2O <=> L-Lysine + 2-Oxoglutarate + NADPH + H+
R00717	C00160 + C00003 <=> C00048 + C00004 + C00080	Glycolate + NAD+ <=> Glyoxylate + NADH + H+
R00719	C00081 + C00001 <=> C00104 + C00009	ITP + H2O <=> IDP + Orthophosphate
R00720	C00081 + C00001 <=> C00130 + C00013	ITP + H2O <=> IMP + Diphosphate
R00722	C00002 + C00104 <=> C00008 + C00081	ATP + IDP <=> ADP + ITP
R00723	C03614 + C00001 <=> C00081 + C00009	Inosine 5'-tetraphosphate + H2O <=> ITP + Orthophosphate
R00724	C00081 + C00022 <=> C00104 + C00074	ITP + Pyruvate <=> IDP + Phosphoenolpyruvate
R00725	C00081 + C00031 <=> C00104 + C00092	ITP + D-Glucose <=> IDP + D-Glucose 6-phosphate
R00726	C00081 + C00036 <=> C00104 + C00074 + C00011	ITP + Oxaloacetate <=> IDP + Phosphoenolpyruvate + CO2
R00727	C00081 + C00042 + C00010 <=> C00104 + C00009 + C00091	ITP + Succinate + CoA <=> IDP + Orthophosphate + Succinyl-CoA
R00728	C00082 + C00001 <=> C00146 + C00022 + C00014	L-Tyrosine + H2O <=> Phenol + Pyruvate + Ammonia
R00729	C00082 + C00001 + C00007 <=> C01179 + C00014 + C00027	L-Tyrosine + H2O + Oxygen <=> 3-(4-Hydroxyphenyl)pyruvate + Ammonia + Hydrogen peroxide
R00731	C00082 + C00007 <=> C00355 + C00001	L-Tyrosine + Oxygen <=> 3,4-Dihydroxy-L-phenylalanine + H2O
R00732	C00826 + C00003 <=> C00082 + C00011 + C00004 + C00080	L-Arogenate + NAD+ <=> L-Tyrosine + CO2 + NADH + H+
R00733	C00826 + C00006 <=> C00082 + C00011 + C00005 + C00080	L-Arogenate + NADP+ <=> L-Tyrosine + CO2 + NADPH + H+
R00734	C00082 + C00026 <=> C01179 + C00025	L-Tyrosine + 2-Oxoglutarate <=> 3-(4-Hydroxyphenyl)pyruvate + L-Glutamate
R00735	C00002 + C00082 + C00062 <=> C00020 + C00013 + C02993	ATP + L-Tyrosine + L-Arginine <=> AMP + Diphosphate + Kyotorphin
R00736	C00082 <=> C00483 + C00011	L-Tyrosine <=> Tyramine + CO2
R00737	C00082 <=> C00811 + C00014	L-Tyrosine <=> 4-Coumarate + Ammonia
R00739	C00082 <=> C04368	L-Tyrosine <=> 3-Amino-3-(4-hydroxyphenyl)propanoate
R00740	C00222 + C00010 + C00006 <=> C00083 + C00005 + C00080	3-Oxopropanoate + CoA + NADP+ <=> Malonyl-CoA + NADPH + H+
R00742	C00002 + C00024 + C00288 <=> C00008 + C00009 + C00083	ATP + Acetyl-CoA + HCO3- <=> ADP + Orthophosphate + Malonyl-CoA
R00743	C00024 + C00383 <=> C00033 + C00083	Acetyl-CoA + Malonate <=> Acetate + Malonyl-CoA
R00744	C00083 + C00005 + C00080 <=> C05989 + C00006 + C00001	Malonyl-CoA + NADPH + H+ <=> 3-Oxopropionyl-CoA + NADP+ + H2O
R00746	C00469 + C00006 <=> C00084 + C00005 + C00080	Ethanol + NADP+ <=> Acetaldehyde + NADPH + H+
R00747	C03167 + C00001 <=> C00084 + C00009	Phosphonoacetaldehyde + H2O <=> Acetaldehyde + Orthophosphate
R00748	C00346 + C00001 <=> C00084 + C00014 + C00009	Ethanolamine phosphate + H2O <=> Acetaldehyde + Ammonia + Orthophosphate
R00749	C00189 <=> C00084 + C00014	Ethanolamine <=> Acetaldehyde + Ammonia
R00750	C00084 + C00022 <=> C03589	Acetaldehyde + Pyruvate <=> 4-Hydroxy-2-oxopentanoate
R00751	C00188 <=> C00037 + C00084	L-Threonine <=> Glycine + Acetaldehyde
R00753	C00186 <=> C00058 + C00084	(S)-Lactate <=> Formate + Acetaldehyde
R00754	C00469 + C00003 <=> C00084 + C00004 + C00080	Ethanol + NAD+ <=> Acetaldehyde + NADH + H+
R00755	C00084 + C00068 <=> C05125	Acetaldehyde + Thiamin diphosphate <=> 2-(alpha-Hydroxyethyl)thiamine diphosphate
R00756	C00002 + C00085 <=> C00008 + C00354	ATP + D-Fructose 6-phosphate <=> ADP + D-Fructose 1,6-bisphosphate
R00758	C00644 + C00003 <=> C00085 + C00004 + C00080	D-Mannitol 1-phosphate + NAD+ <=> D-Fructose 6-phosphate + NADH + H+
R00760	C00002 + C00095 <=> C00008 + C00085	ATP + D-Fructose <=> ADP + D-Fructose 6-phosphate
R00761	C00085 + C00009 <=> C00227 + C00279 + C00001	D-Fructose 6-phosphate + Orthophosphate <=> Acetyl phosphate + D-Erythrose 4-phosphate + H2O
R00762	C00354 + C00001 <=> C00085 + C00009	D-Fructose 1,6-bisphosphate + H2O <=> D-Fructose 6-phosphate + Orthophosphate
R00763	C00665 + C00001 <=> C00085 + C00009	beta-D-Fructose 2,6-bisphosphate + H2O <=> D-Fructose 6-phosphate + Orthophosphate
R00764	C00013 + C00085 <=> C00009 + C00354	Diphosphate + D-Fructose 6-phosphate <=> Orthophosphate + D-Fructose 1,6-bisphosphate
R00765	C00352 + C00001 <=> C00085 + C00014	D-Glucosamine 6-phosphate + H2O <=> D-Fructose 6-phosphate + Ammonia
R00766	C00029 + C00085 <=> C00015 + C02591	UDP-glucose + D-Fructose 6-phosphate <=> UDP + Sucrose 6'-phosphate
R00767	C00063 + C00085 <=> C00112 + C00354	CTP + D-Fructose 6-phosphate <=> CDP + D-Fructose 1,6-bisphosphate
R00768	C00064 + C00085 <=> C00025 + C00352	L-Glutamine + D-Fructose 6-phosphate <=> L-Glutamate + D-Glucosamine 6-phosphate
R00769	C00075 + C00085 <=> C00015 + C00354	UTP + D-Fructose 6-phosphate <=> UDP + D-Fructose 1,6-bisphosphate
R00770	C00081 + C00085 <=> C00104 + C00354	ITP + D-Fructose 6-phosphate <=> IDP + D-Fructose 1,6-bisphosphate
R00771	C00092 <=> C00085	D-Glucose 6-phosphate <=> D-Fructose 6-phosphate
R00772	C00275 <=> C00085	D-Mannose 6-phosphate <=> D-Fructose 6-phosphate
R00774	C00002 + C00086 + C00288 <=> C00008 + C00009 + C01010	ATP + Urea + HCO3- <=> ADP + Orthophosphate + Urea-1-carboxylate
R00775	C00581 + C00001 <=> C00037 + C00086	Guanidinoacetate + H2O <=> Glycine + Urea
R00776	C00603 <=> C00048 + C00086	(S)-Ureidoglycolate <=> Glyoxylate + Urea
R00777	C03139 + C00001 <=> C00049 + C00086	N-Amidino-L-aspartate + H2O <=> L-Aspartate + Urea
R00778	C00086 <=> C01566 + C00001	Urea <=> Cyanamide + H2O
R00781	C00087 + C00007 + C00001 <=> C00094	Sulfur + Oxygen + H2O <=> Sulfite
R00782	C00097 + C00001 <=> C00283 + C00022 + C00014	L-Cysteine + H2O <=> Hydrogen sulfide + Pyruvate + Ammonia
R00787	C00014 + 3 C00003 + 2 C00001 <=> C00088 + 3 C00004 + 3 C00080	Ammonia + 3 NAD+ + 2 H2O <=> Nitrite + 3 NADH + 3 H+
R00789	C00014 + 3 C00006 + 2 C00001 <=> C00088 + 3 C00005 + 3 C00080	Ammonia + 3 NADP+ + 2 H2O <=> Nitrite + 3 NADPH + 3 H+
R00793	C00088 + C00001 <=> C00192 + C00007	Nitrite + H2O <=> Hydroxylamine + Oxygen
R00794	C00088 + C00003 + C00001 <=> C00244 + C00004 + C00080	Nitrite + NAD+ + H2O <=> Nitrate + NADH + H+
R00796	C00088 + C00006 + C00001 <=> C00244 + C00005 + C00080	Nitrite + NADP+ + H2O <=> Nitrate + NADPH + H+
R00799	C00088 + C00084 + C00027 <=> C01837 + C00007 + C00001	Nitrite + Acetaldehyde + Hydrogen peroxide <=> Nitroethane + Oxygen + H2O
R00800	2 C00088 + C00007 <=> 2 C00244	2 Nitrite + Oxygen <=> 2 Nitrate
R00801	C00089 + C00001 <=> C00095 + C00031	Sucrose + H2O <=> D-Fructose + D-Glucose
R00802	C00089 + C00001 <=> C02336 + C00267	Sucrose + H2O <=> beta-D-Fructose + alpha-D-Glucose
R00803	C00089 + C00009 <=> C00095 + C00103	Sucrose + Orthophosphate <=> D-Fructose + D-Glucose 1-phosphate
R00805	C02591 + C00001 <=> C00089 + C00009	Sucrose 6'-phosphate + H2O <=> Sucrose + Orthophosphate
R00806	C00029 + C00095 <=> C00015 + C00089	UDP-glucose + D-Fructose <=> UDP + Sucrose
R00807	C00089 + C00016 <=> C05731 + C01352	Sucrose + FAD <=> 3-Ketosucrose + FADH2
R00809	C00052 + C00089 <=> C00015 + C03848	UDP-alpha-D-galactose + Sucrose <=> UDP + 6F-alpha-D-Galactosylsucrose
R00810	C00089 <=> C01742	Sucrose <=> Palatinose
R00812	C04091 + C00003 <=> C00090 + C00004 + C00080	cis-1,2-Dihydrobenzene-1,2-diol + NAD+ <=> Catechol + NADH + H+
R00813	C06321 + C00003 <=> C00090 + C00004 + C00011 + C00080	(1R,6S)-1,6-Dihydroxycyclohexa-2,4-diene-1-carboxylate + NAD+ <=> Catechol + NADH + CO2 + H+
R00814	C04221 + C00006 <=> C00090 + C00005 + C00080	trans-1,2-Dihydrobenzene-1,2-diol + NADP+ <=> Catechol + NADPH + H+
R00815	C00146 + C00007 + C00005 + C00080 <=> C00090 + C00006 + C00001	Phenol + Oxygen + NADPH + H+ <=> Catechol + NADP+ + H2O
R00816	C00090 + C00007 <=> C00682	Catechol + Oxygen <=> 2-Hydroxymuconate semialdehyde
R00817	C00090 + C00007 <=> C02480	Catechol + Oxygen <=> cis,cis-Muconate
R00818	C00805 + C00007 + C00004 + C00080 <=> C00090 + C00011 + C00003 + C00001	Salicylate + Oxygen + NADH + H+ <=> Catechol + CO2 + NAD+ + H2O
R00821	C00196 <=> C00090 + C00011	2,3-Dihydroxybenzoate <=> Catechol + CO2
R00822	C00230 <=> C00090 + C00011	3,4-Dihydroxybenzoate <=> Catechol + CO2
R00823	C00108 + C00007 + C00004 + C00080 <=> C00090 + C00014 + C00011 + C00003	Anthranilate + Oxygen + NADH + H+ <=> Catechol + Ammonia + CO2 + NAD+
R00825	C00108 + C00007 + C00005 + C00080 <=> C00090 + C00014 + C00011 + C00006	Anthranilate + Oxygen + NADPH + H+ <=> Catechol + Ammonia + CO2 + NADP+
R00827	C00019 + C00090 <=> C00021 + C01502	S-Adenosyl-L-methionine + Catechol <=> S-Adenosyl-L-homocysteine + o-Methoxyphenol
R00828	C01988 + C00007 + 2 C00005 + 2 C00080 <=> C00090 + C00088 + 2 C00006 + C00001	2-Nitrophenol + Oxygen + 2 NADPH + 2 H+ <=> Catechol + Nitrite + 2 NADP+ + H2O
R00829	C00091 + C00024 <=> C00010 + C02232	Succinyl-CoA + Acetyl-CoA <=> CoA + 3-Oxoadipyl-CoA
R00830	C00091 + C00037 <=> C00430 + C00010 + C00011	Succinyl-CoA + Glycine <=> 5-Aminolevulinate + CoA + CO2
R00832	C00091 + C00062 <=> C00010 + C03296	Succinyl-CoA + L-Arginine <=> CoA + N2-Succinyl-L-arginine
R00833	C01213 <=> C00091	(R)-Methylmalonyl-CoA <=> Succinyl-CoA
R00834	C01096 + C00006 <=> C00092 + C00005 + C00080	Sorbitol 6-phosphate + NADP+ <=> D-Glucose 6-phosphate + NADPH + H+
R00835	C00092 + C00006 <=> C01236 + C00005 + C00080	D-Glucose 6-phosphate + NADP+ <=> D-Glucono-1,5-lactone 6-phosphate + NADPH + H+
R00836	C00029 + C00092 <=> C00015 + C00689	UDP-glucose + D-Glucose 6-phosphate <=> UDP + alpha,alpha'-Trehalose 6-phosphate
R00837	C00001 + C00689 <=> C00031 + C00092	H2O + alpha,alpha'-Trehalose 6-phosphate <=> D-Glucose + D-Glucose 6-phosphate
R00838	C00001 + C02995 <=> C00031 + C00092	H2O + Maltose 6'-phosphate <=> D-Glucose + D-Glucose 6-phosphate
R00839	C04534 + C00001 <=> C00031 + C00092	6-Phospho-beta-D-glucosyl-(1,4)-D-glucose + H2O <=> D-Glucose + D-Glucose 6-phosphate
R00841	C00093 + C00001 <=> C00116 + C00009	sn-Glycerol 3-phosphate + H2O <=> Glycerol + Orthophosphate
R00842	C00093 + C00003 <=> C00111 + C00004 + C00080	sn-Glycerol 3-phosphate + NAD+ <=> Glycerone phosphate + NADH + H+
R00844	C00093 + C00006 <=> C00111 + C00005 + C00080	sn-Glycerol 3-phosphate + NADP+ <=> Glycerone phosphate + NADPH + H+
R00845	C00093 + C00006 <=> C00118 + C00005 + C00080	sn-Glycerol 3-phosphate + NADP+ <=> D-Glyceraldehyde 3-phosphate + NADPH + H+
R00846	C00093 + C00007 <=> C00111 + C00027	sn-Glycerol 3-phosphate + Oxygen <=> Glycerone phosphate + Hydrogen peroxide
R00847	C00002 + C00116 <=> C00008 + C00093	ATP + Glycerol <=> ADP + sn-Glycerol 3-phosphate
R00848	C00093 + C00016 <=> C00111 + C01352	sn-Glycerol 3-phosphate + FAD <=> Glycerone phosphate + FADH2
R00850	C00093 + C00031 <=> C00116 + C00092	sn-Glycerol 3-phosphate + D-Glucose <=> Glycerol + D-Glucose 6-phosphate
R00853	C00052 + C00093 <=> C00015 + C04641	UDP-alpha-D-galactose + sn-Glycerol 3-phosphate <=> UDP + 2-(alpha-D-Galactosyl)-sn-glycerol 3-phosphate
R00854	C00052 + C00093 <=> C00015 + C04703	UDP-alpha-D-galactose + sn-Glycerol 3-phosphate <=> UDP + alpha-D-Galactosyl-(1,1')-sn-glycerol 3-phosphate
R00855	C00513 + C00001 <=> C00055 + C00093	CDP-glycerol + H2O <=> CMP + sn-Glycerol 3-phosphate
R00856	C00063 + C00093 <=> C00013 + C00513	CTP + sn-Glycerol 3-phosphate <=> Diphosphate + CDP-glycerol
R00858	C00283 + 3 C00006 + 3 C00001 <=> C00094 + 3 C00005 + 3 C00080	Hydrogen sulfide + 3 NADP+ + 3 H2O <=> Sulfite + 3 NADPH + 3 H+
R00863	C00606 <=> C00041 + C09306	3-Sulfino-L-alanine <=> L-Alanine + Sulfur dioxide
R00864	C00094 + C00087 <=> C00320	Sulfite + Sulfur <=> Thiosulfate
R00866	C00002 + C00095 <=> C00008 + C01094	ATP + D-Fructose <=> ADP + D-Fructose 1-phosphate
R00867	C00002 + C00095 <=> C00008 + C05345	ATP + D-Fructose <=> ADP + beta-D-Fructose 6-phosphate
R00868	C00392 + C00003 <=> C00095 + C00004 + C00080	Mannitol + NAD+ <=> D-Fructose + NADH + H+
R00870	C00392 + C00006 <=> C00095 + C00005 + C00080	Mannitol + NADP+ <=> D-Fructose + NADPH + H+
R00871	C10906 + C00006 <=> C00273 + C00005 + C00080	D-Fructose + NADP+ <=> 5-Dehydro-D-fructose + NADPH + H+
R00872	C03267 + C00001 <=> C00095 + C00009	beta-D-Fructose 2-phosphate + H2O <=> D-Fructose + Orthophosphate
R00874	C00095 + C00031 <=> C00198 + C00794	D-Fructose + D-Glucose <=> D-Glucono-1,5-lactone + D-Sorbitol
R00875	C00794 + C00003 <=> C00095 + C00004 + C00080	D-Sorbitol + NAD+ <=> D-Fructose + NADH + H+
R00876	C00081 + C00095 <=> C00104 + C00085	ITP + D-Fructose <=> IDP + D-Fructose 6-phosphate
R00877	C00159 <=> C00095	D-Mannose <=> D-Fructose
R00878	C00267 <=> C00095	alpha-D-Glucose <=> D-Fructose
R00880	C00096 + C00001 + 2 C00003 <=> C00976 + 2 C00004 + 2 C00080	GDP-mannose + H2O + 2 NAD+ <=> GDP-D-mannuronate + 2 NADH + 2 H+
R00881	C00096 + C00001 <=> C00144 + C00636	GDP-mannose + H2O <=> GMP + D-Mannose 1-phosphate
R00883	C00035 + C00636 <=> C00009 + C00096	GDP + D-Mannose 1-phosphate <=> Orthophosphate + GDP-mannose
R00885	C00044 + C00636 <=> C00013 + C00096	GTP + D-Mannose 1-phosphate <=> Diphosphate + GDP-mannose
R00888	C00096 <=> C01222 + C00001	GDP-mannose <=> GDP-4-dehydro-6-deoxy-D-mannose + H2O
R00889	C00096 <=> C02280	GDP-mannose <=> GDP-L-galactose
R00891	C00065 + C00283 <=> C00097 + C00001	L-Serine + Hydrogen sulfide <=> L-Cysteine + H2O
R00892	2 C00097 + C00003 <=> C00491 + C00080 + C00004	2 L-Cysteine + NAD+ <=> L-Cystine + H+ + NADH
R00893	C00097 + C00007 <=> C00606	L-Cysteine + Oxygen <=> 3-Sulfino-L-alanine
R00894	C00002 + C00025 + C00097 <=> C00008 + C00009 + C00669	ATP + L-Glutamate + L-Cysteine <=> ADP + Orthophosphate + gamma-L-Glutamyl-L-cysteine
R00895	C00097 + C00026 <=> C00957 + C00025	L-Cysteine + 2-Oxoglutarate <=> Mercaptopyruvate + L-Glutamate
R00896	C00097 + C00026 <=> C00957 + C00302	L-Cysteine + 2-Oxoglutarate <=> Mercaptopyruvate + Glutamate
R00897	C00979 + C00283 <=> C00097 + C00033	O-Acetyl-L-serine + Hydrogen sulfide <=> L-Cysteine + Acetate
R00899	C01419 + C00001 <=> C00097 + C00037	Cys-Gly + H2O <=> L-Cysteine + Glycine
R00900	C00097 + C00051 + C00006 <=> C05526 + C00005	L-Cysteine + Glutathione + NADP+ <=> S-Glutathionyl-L-cysteine + NADPH
R00901	C00097 + C00094 <=> C00283 + C00506	L-Cysteine + Sulfite <=> Hydrogen sulfide + L-Cysteate
R00903	C00097 <=> C00793	L-Cysteine <=> D-Cysteine
R00904	C05665 + C00003 + C00001 <=> C00099 + C00004 + C00080	3-Aminopropanal + NAD+ + H2O <=> beta-Alanine + NADH + H+
R00905	C02642 + C00001 <=> C00099 + C00011 + C00014	3-Ureidopropionate + H2O <=> beta-Alanine + CO2 + Ammonia
R00906	C02207 + C00003 + C00001 <=> C00099 + C00022 + C00004 + C00080	beta-Alanopine + NAD+ + H2O <=> beta-Alanine + Pyruvate + NADH + H+
R00907	C00041 + C00222 <=> C00022 + C00099	L-Alanine + 3-Oxopropanoate <=> Pyruvate + beta-Alanine
R00908	C00099 + C00026 <=> C00222 + C00025	beta-Alanine + 2-Oxoglutarate <=> 3-Oxopropanoate + L-Glutamate
R00909	C01073 + C00001 <=> C00033 + C00099	N-Acetyl-beta-alanine + H2O <=> Acetate + beta-Alanine
R00910	C00002 + C00047 + C00099 <=> C00008 + C00009 + C05341	ATP + L-Lysine + beta-Alanine <=> ADP + Orthophosphate + beta-Alanyl-L-lysine
R00911	C05341 + C00001 <=> C00099 + C00047	beta-Alanyl-L-lysine + H2O <=> beta-Alanine + L-Lysine
R00912	C00002 + C00062 + C00099 <=> C00008 + C00009 + C05340	ATP + L-Arginine + beta-Alanine <=> ADP + Orthophosphate + beta-Alanyl-L-arginine
R00913	C03065 + C00001 <=> C00099 + C00086	3-Guanidinopropanoate + H2O <=> beta-Alanine + Urea
R00917	C00099 + C00014 <=> C05670 + 2 C00001	beta-Alanine + Ammonia <=> 3-Aminopropiononitrile + 2 H2O
R00918	C00100 + 6 C00683 + 6 C00005 + 6 C00080 <=> C03240 + 7 C00010 + 6 C00011 + C00001 + 6 C00006	Propanoyl-CoA + 6 (S)-Methylmalonyl-CoA + 6 NADPH + 6 H+ <=> 6-Deoxyerythronolide B + 7 CoA + 6 CO2 + H2O + 6 NADP+
R00919	C00100 + C00006 <=> C00894 + C00005 + C00080	Propanoyl-CoA + NADP+ <=> Propenoyl-CoA + NADPH + H+
R00920	C00002 + C00163 + C00010 <=> C00008 + C00009 + C00100	ATP + Propanoate + CoA <=> ADP + Orthophosphate + Propanoyl-CoA
R00921	C00100 + C00009 <=> C02876 + C00010	Propanoyl-CoA + Orthophosphate <=> Propanoyl phosphate + CoA
R00922	C00349 + C00010 + C00003 <=> C00100 + C00011 + C00004 + C00080	2-Methyl-3-oxopropanoate + CoA + NAD+ <=> Propanoyl-CoA + CO2 + NADH + H+
R00923	C00683 <=> C00100 + C00011	(S)-Methylmalonyl-CoA <=> Propanoyl-CoA + CO2
R00924	C00100 + C00016 <=> C01352 + C00894	Propanoyl-CoA + FAD <=> FADH2 + Propenoyl-CoA
R00925	C00002 + C00163 + C00010 <=> C00020 + C00013 + C00100	ATP + Propanoate + CoA <=> AMP + Diphosphate + Propanoyl-CoA
R00926	C05983 + C00010 <=> C00020 + C00100	Propionyladenylate + CoA <=> AMP + Propanoyl-CoA
R00927	C00100 + C00024 <=> C00010 + C03344	Propanoyl-CoA + Acetyl-CoA <=> CoA + 2-Methylacetoacetyl-CoA
R00928	C00024 + C00163 <=> C00033 + C00100	Acetyl-CoA + Propanoate <=> Acetate + Propanoyl-CoA
R00930	C00683 + C00022 <=> C00100 + C00036	(S)-Methylmalonyl-CoA + Pyruvate <=> Propanoyl-CoA + Oxaloacetate
R00931	C02225 + C00010 <=> C00100 + C00036 + C00001	2-Methylcitrate + CoA <=> Propanoyl-CoA + Oxaloacetate + H2O
R00932	C02630 + C00010 <=> C00100 + C00001 + C00048	2-Hydroxyglutarate + CoA <=> Propanoyl-CoA + H2O + Glyoxylate
R00934	C00100 + C00048 <=> C06027	Propanoyl-CoA + Glyoxylate <=> L-erythro-3-Methylmalyl-CoA
R00935	C06002 + C00010 + C00003 <=> C00100 + C00011 + C00004 + C00080	(S)-Methylmalonate semialdehyde + CoA + NAD+ <=> Propanoyl-CoA + CO2 + NADH + H+
R00936	C00101 + C00003 <=> C00415 + C00004 + C00080	Tetrahydrofolate + NAD+ <=> Dihydrofolate + NADH + H+
R00937	C00101 + 2 C00003 <=> C00504 + 2 C00004 + 2 C00080	Tetrahydrofolate + 2 NAD+ <=> Folate + 2 NADH + 2 H+
R00939	C00101 + C00006 <=> C00415 + C00005 + C00080	Tetrahydrofolate + NADP+ <=> Dihydrofolate + NADPH + H+
R00940	C00101 + 2 C00006 <=> C00504 + 2 C00005 + 2 C00080	Tetrahydrofolate + 2 NADP+ <=> Folate + 2 NADPH + 2 H+
R00941	C00234 + C00006 + C00001 <=> C00101 + C00011 + C00005 + C00080	10-Formyltetrahydrofolate + NADP+ + H2O <=> Tetrahydrofolate + CO2 + NADPH + H+
R00942	C00002 + C00101 + C00025 <=> C00008 + C00009 + C09332	ATP + Tetrahydrofolate + L-Glutamate <=> ADP + Orthophosphate + THF-L-glutamate
R00943	C00101 + C00058 + C00002 <=> C00008 + C00009 + C00234	Tetrahydrofolate + Formate + ATP <=> ADP + Orthophosphate + 10-Formyltetrahydrofolate
R00944	C00234 + C00001 <=> C00058 + C00101	10-Formyltetrahydrofolate + H2O <=> Formate + Tetrahydrofolate
R00945	C00143 + C00037 + C00001 <=> C00101 + C00065	5,10-Methylenetetrahydrofolate + Glycine + H2O <=> Tetrahydrofolate + L-Serine
R00946	C00440 + C00155 <=> C00101 + C00073	5-Methyltetrahydrofolate + L-Homocysteine <=> Tetrahydrofolate + L-Methionine
R00947	C00103 + C00001 <=> C00267 + C00009	D-Glucose 1-phosphate + H2O <=> alpha-D-Glucose + Orthophosphate
R00948	C00002 + C00103 <=> C00013 + C00498	ATP + D-Glucose 1-phosphate <=> Diphosphate + ADP-glucose
R00949	C00002 + C00103 <=> C00008 + C01231	ATP + D-Glucose 1-phosphate <=> ADP + alpha-D-Glucose 1,6-bisphosphate
R00951	C00498 + C00001 <=> C00020 + C00103	ADP-glucose + H2O <=> AMP + D-Glucose 1-phosphate
R00952	C00185 + C00009 <=> C00103 + C00031	Cellobiose + Orthophosphate <=> D-Glucose 1-phosphate + D-Glucose
R00953	C02048 + C00009 <=> C00031 + C00103	Laminaribiose + Orthophosphate <=> D-Glucose + D-Glucose 1-phosphate
R00954	C00044 + C00103 <=> C00013 + C00394	GTP + D-Glucose 1-phosphate <=> Diphosphate + GDP-glucose
R00955	C00029 + C00446 <=> C00103 + C00052	UDP-glucose + alpha-D-Galactose 1-phosphate <=> D-Glucose 1-phosphate + UDP-alpha-D-galactose
R00956	C00063 + C00103 <=> C00013 + C00501	CTP + D-Glucose 1-phosphate <=> Diphosphate + CDP-glucose
R00957	2 C00103 + C00001 <=> C00208 + 2 C00009	2 D-Glucose 1-phosphate + H2O <=> Maltose + 2 Orthophosphate
R00959	C00103 <=> C00668	D-Glucose 1-phosphate <=> alpha-D-Glucose 6-phosphate
R00960	2 C00103 <=> C01231 + C00031	2 D-Glucose 1-phosphate <=> alpha-D-Glucose 1,6-bisphosphate + D-Glucose
R00961	C00104 + C00001 <=> C00130 + C00009	IDP + H2O <=> IMP + Orthophosphate
R00962	C00081 + C00475 <=> C00104 + C00055	ITP + Cytidine <=> IDP + CMP
R00963	C00105 + C00001 <=> C00299 + C00009	UMP + H2O <=> Uridine + Orthophosphate
R00964	C00002 + C00299 <=> C00008 + C00105	ATP + Uridine <=> ADP + UMP
R00965	C01103 <=> C00105 + C00011	Orotidine 5'-phosphate <=> UMP + CO2
R00966	C00105 + C00013 <=> C00106 + C00119	UMP + Diphosphate <=> Uracil + 5-Phospho-alpha-D-ribose 1-diphosphate
R00967	C00075 + C00299 <=> C00015 + C00105	UTP + Uridine <=> UDP + UMP
R00968	C00044 + C00299 <=> C00035 + C00105	GTP + Uridine <=> GDP + UMP
R00969	C06198 + C00001 <=> C00075 + C00105	P1,P4-Bis(5'-uridyl) tetraphosphate + H2O <=> UTP + UMP
R00970	C00081 + C00299 <=> C00104 + C00105	ITP + Uridine <=> IDP + UMP
R00973	C03030 <=> C00106 + C00011	Uracil 5-carboxylate <=> Uracil + CO2
R00974	C00380 + C00001 <=> C00106 + C00014	Cytosine + H2O <=> Uracil + Ammonia
R00975	C00429 + C00007 <=> C00106 + C00027	5,6-Dihydrouracil + Oxygen <=> Uracil + Hydrogen peroxide
R00977	C00429 + C00003 <=> C00106 + C00004 + C00080	5,6-Dihydrouracil + NAD+ <=> Uracil + NADH + H+
R00978	C00429 + C00006 <=> C00106 + C00005 + C00080	5,6-Dihydrouracil + NADP+ <=> Uracil + NADPH + H+
R00980	C00108 + C00007 + C00005 + C00080 <=> C00196 + C00014 + C00006	Anthranilate + Oxygen + NADPH + H+ <=> 2,3-Dihydroxybenzoate + Ammonia + NADP+
R00982	C00002 + C00108 + C00010 <=> C00020 + C00013 + C02247	ATP + Anthranilate + CoA <=> AMP + Diphosphate + Anthraniloyl-CoA
R00983	C02775 + C00007 <=> C00108 + C00011	2,3-Dihydroxyindole + Oxygen <=> Anthranilate + CO2
R00984	C00019 + C00108 <=> C00021 + C03005	S-Adenosyl-L-methionine + Anthranilate <=> S-Adenosyl-L-homocysteine + N-Methylanthranilate
R00985	C00251 + C00014 <=> C00108 + C00022 + C00001	Chorismate + Ammonia <=> Anthranilate + Pyruvate + H2O
R00986	C00251 + C00064 <=> C00108 + C00022 + C00025	Chorismate + L-Glutamine <=> Anthranilate + Pyruvate + L-Glutamate
R00987	C00328 + C00001 <=> C00108 + C00041	L-Kynurenine + H2O <=> Anthranilate + L-Alanine
R00988	C05653 + C00001 <=> C00058 + C00108	Formylanthranilate + H2O <=> Formate + Anthranilate
R00989	C00083 + C00108 <=> C00010 + C03147	Malonyl-CoA + Anthranilate <=> CoA + N-Malonylanthranilate
R00990	C00108 <=> C00292 + C00011	Anthranilate <=> Aniline + CO2
R00993	C00109 + C00009 + C00007 <=> C02876 + C00011 + C00027	2-Oxobutanoate + Orthophosphate + Oxygen <=> Propanoyl phosphate + CO2 + Hydrogen peroxide
R00994	C00109 + C00011 + C00004 + C00080 <=> C06032 + C00003	2-Oxobutanoate + CO2 + NADH + H+ <=> D-erythro-3-Methylmalate + NAD+
R00995	C00109 + C00011 <=> C06030	2-Oxobutanoate + CO2 <=> Methyloxaloacetate
R00996	C00188 <=> C00109 + C00014	L-Threonine <=> 2-Oxobutanoate + Ammonia
R00997	C01234 + C00001 <=> C00109 + C00014	1-Aminocyclopropane-1-carboxylate + H2O <=> 2-Oxobutanoate + Ammonia
R00998	C02488 + C00010 <=> C00024 + C00001 + C00109	(R)-2-Ethylmalate + CoA <=> Acetyl-CoA + H2O + 2-Oxobutanoate
R00999	C01118 + C00001 <=> C00109 + C00042 + C00014	O-Succinyl-L-homoserine + H2O <=> 2-Oxobutanoate + Succinate + Ammonia
R01000	C05984 + C00003 <=> C00109 + C00004 + C00080	2-Hydroxybutanoic acid + NAD+ <=> 2-Oxobutanoate + NADH + H+
R01001	C02291 + C00001 <=> C00097 + C00014 + C00109	L-Cystathionine + H2O <=> L-Cysteine + Ammonia + 2-Oxobutanoate
R01010	C00111 + C00001 <=> C00184 + C00009	Glycerone phosphate + H2O <=> Glycerone + Orthophosphate
R01011	C00002 + C00184 <=> C00008 + C00111	ATP + Glycerone <=> ADP + Glycerone phosphate
R01012	C00074 + C00184 <=> C00022 + C00111	Phosphoenolpyruvate + Glycerone <=> Pyruvate + Glycerone phosphate
R01014	C03394 <=> C00111 + C00067	Erythrulose 1-phosphate <=> Glycerone phosphate + Formaldehyde
R01015	C00118 <=> C00111	D-Glyceraldehyde 3-phosphate <=> Glycerone phosphate
R01016	C00111 <=> C00546 + C00009	Glycerone phosphate <=> Methylglyoxal + Orthophosphate
R01019	C00113 + C00084 + C00001 <=> C01359 + C00033	PQQ + Acetaldehyde + H2O <=> PQQH2 + Acetate
R01021	C00002 + C00114 <=> C00008 + C00588	ATP + Choline <=> ADP + Choline phosphate
R01022	C00114 + C00007 <=> C00576 + C00027	Choline + Oxygen <=> Betaine aldehyde + Hydrogen peroxide
R01023	C00024 + C00114 <=> C00010 + C01996	Acetyl-CoA + Choline <=> CoA + Acetylcholine
R01026	C01996 + C00001 <=> C00114 + C00033	Acetylcholine + H2O <=> Choline + Acetate
R01027	C00053 + C00114 <=> C00054 + C00919	3'-Phosphoadenylyl sulfate + Choline <=> Adenosine 3',5'-bisphosphate + Choline sulfate
R01028	C00919 + C00001 <=> C00114 + C00059	Choline sulfate + H2O <=> Choline + Sulfate
R01030	C00670 + C00001 <=> C00114 + C00093	sn-Glycero-3-phosphocholine + H2O <=> Choline + sn-Glycerol 3-phosphate
R01031	C02634 + C00001 <=> C00022 + C01327 + C00014	3-Chloro-D-alanine + H2O <=> Pyruvate + Hydrochloric acid + Ammonia
R01032	C00698 + C00022 + C00014 <=> C02635 + C00001	Cl- + Pyruvate + Ammonia <=> 3-Chloro-L-alanine + H2O
R01033	C02357 + C00007 + C00004 <=> C00698 + C00090 + C00003 + C00011	2-Chlorobenzoate + Oxygen + NADH <=> Cl- + Catechol + NAD+ + CO2
R01034	C00116 + C00003 <=> C00184 + C00004 + C00080	Glycerol + NAD+ <=> Glycerone + NADH + H+
R01036	C00116 + C00003 <=> C00577 + C00004 + C00080	Glycerol + NAD+ <=> D-Glyceraldehyde + NADH + H+
R01039	C00116 + C00006 <=> C00184 + C00005 + C00080	Glycerol + NADP+ <=> Glycerone + NADPH + H+
R01041	C00116 + C00006 <=> C00577 + C00005 + C00080	Glycerol + NADP+ <=> D-Glyceraldehyde + NADPH + H+
R01043	C02979 + C00001 <=> C00116 + C00009	Glycerol 2-phosphate + H2O <=> Glycerol + Orthophosphate
R01044	C00013 + C00116 <=> C00009 + C00623	Diphosphate + Glycerol <=> Orthophosphate + sn-Glycerol 1-phosphate
R01047	C00116 <=> C00969 + C00001	Glycerol <=> 3-Hydroxypropanal + H2O
R01049	C00002 + C00117 <=> C00020 + C00119	ATP + D-Ribose 5-phosphate <=> AMP + 5-Phospho-alpha-D-ribose 1-diphosphate
R01050	C00002 + C00117 <=> C00008 + C01151	ATP + D-Ribose 5-phosphate <=> ADP + D-Ribose 1,5-bisphosphate
R01051	C00002 + C00121 <=> C00008 + C00117	ATP + D-Ribose <=> ADP + D-Ribose 5-phosphate
R01052	C00008 + C00117 <=> C00009 + C00301	ADP + D-Ribose 5-phosphate <=> Orthophosphate + ADP-ribose
R01053	C00002 + C00117 + C00014 <=> C00008 + C00009 + C03090	ATP + D-Ribose 5-phosphate + Ammonia <=> ADP + Orthophosphate + 5-Phosphoribosylamine
R01054	C00301 + C00001 <=> C00020 + C00117	ADP-ribose + H2O <=> AMP + D-Ribose 5-phosphate
R01055	C00106 + C00117 <=> C01168 + C00001	Uracil + D-Ribose 5-phosphate <=> Pseudouridine 5'-phosphate + H2O
R01056	C00117 <=> C00199	D-Ribose 5-phosphate <=> D-Ribulose 5-phosphate
R01057	C00620 <=> C00117	alpha-D-Ribose 1-phosphate <=> D-Ribose 5-phosphate
R01058	C00118 + C00006 + C00001 <=> C00197 + C00005 + C00080	D-Glyceraldehyde 3-phosphate + NADP+ + H2O <=> 3-Phospho-D-glycerate + NADPH + H+
R01059	C00002 + C00577 <=> C00008 + C00118	ATP + D-Glyceraldehyde <=> ADP + D-Glyceraldehyde 3-phosphate
R01061	C00118 + C00009 + C00003 <=> C00236 + C00004 + C00080	D-Glyceraldehyde 3-phosphate + Orthophosphate + NAD+ <=> 3-Phospho-D-glyceroyl phosphate + NADH + H+
R01063	C00118 + C00009 + C00006 <=> C00236 + C00005 + C00080	D-Glyceraldehyde 3-phosphate + Orthophosphate + NADP+ <=> 3-Phospho-D-glyceroyl phosphate + NADPH + H+
R01064	C01286 <=> C00022 + C00118	2-Dehydro-3-deoxy-6-phospho-D-galactonate <=> Pyruvate + D-Glyceraldehyde 3-phosphate
R01066	C00673 <=> C00118 + C00084	2-Deoxy-D-ribose 5-phosphate <=> D-Glyceraldehyde 3-phosphate + Acetaldehyde
R01067	C00085 + C00118 <=> C00279 + C00231	D-Fructose 6-phosphate + D-Glyceraldehyde 3-phosphate <=> D-Erythrose 4-phosphate + D-Xylulose 5-phosphate
R01068	C00354 <=> C00111 + C00118	D-Fructose 1,6-bisphosphate <=> Glycerone phosphate + D-Glyceraldehyde 3-phosphate
R01069	C03785 <=> C00111 + C00118	D-Tagatose 1,6-bisphosphate <=> Glycerone phosphate + D-Glyceraldehyde 3-phosphate
R01070	C05378 <=> C00111 + C00118	beta-D-Fructose 1,6-bisphosphate <=> Glycerone phosphate + D-Glyceraldehyde 3-phosphate
R01071	C02739 + C00013 <=> C00002 + C00119	1-(5-Phospho-D-ribosyl)-ATP + Diphosphate <=> ATP + 5-Phospho-alpha-D-ribose 1-diphosphate
R01072	C03090 + C00013 + C00025 <=> C00064 + C00119 + C00001	5-Phosphoribosylamine + Diphosphate + L-Glutamate <=> L-Glutamine + 5-Phospho-alpha-D-ribose 1-diphosphate + H2O
R01073	C04302 + C00013 <=> C00108 + C00119	N-(5-Phospho-D-ribosyl)anthranilate + Diphosphate <=> Anthranilate + 5-Phospho-alpha-D-ribose 1-diphosphate
R01074	C00002 + C00120 <=> C00013 + C05921	ATP + Biotin <=> Diphosphate + Biotinyl-5'-AMP
R01075	C00002 + C00120 + C00010 <=> C00020 + C00013 + C01894	ATP + Biotin + CoA <=> AMP + Diphosphate + Biotinyl-CoA
R01076	C01893 + C00001 <=> C00120 + C00014	Biotin amide + H2O <=> Biotin + Ammonia
R01077	C05552 + C00001 <=> C00120 + C00047	Biocytin + H2O <=> Biotin + L-Lysine
R01079	C00121 + C00006 + C00001 <=> C01685 + C00005 + C00080	D-Ribose + NADP+ + H2O <=> D-Ribonate + NADPH + H+
R01080	C00299 + C00001 <=> C00106 + C00121	Uridine + H2O <=> Uracil + D-Ribose
R01081	C00121 <=> C00309	D-Ribose <=> D-Ribulose
R01082	C00149 <=> C00122 + C00001	(S)-Malate <=> Fumarate + H2O
R01083	C03794 <=> C00122 + C00020	N6-(1,2-Dicarboxyethyl)-AMP <=> Fumarate + AMP
R01085	C02514 + C00001 <=> C00122 + C00022	3-Fumarylpyruvate + H2O <=> Fumarate + Pyruvate
R01086	C03406 <=> C00122 + C00062	N-(L-Arginino)succinate <=> Fumarate + L-Arginine
R01087	C01384 <=> C00122	Maleic acid <=> Fumarate
R01088	C00123 + C00001 + C00003 <=> C00233 + C00014 + C00004 + C00080	L-Leucine + H2O + NAD+ <=> 4-Methyl-2-oxopentanoate + Ammonia + NADH + H+
R01089	C00024 + C00123 <=> C00010 + C02710	Acetyl-CoA + L-Leucine <=> CoA + N-Acetyl-L-leucine
R01090	C00123 + C00026 <=> C00233 + C00025	L-Leucine + 2-Oxoglutarate <=> 4-Methyl-2-oxopentanoate + L-Glutamate
R01091	C00123 <=> C02486	L-Leucine <=> (3R)-beta-Leucine
R01092	C00002 + C00984 <=> C00008 + C00446	ATP + alpha-D-Galactose <=> ADP + alpha-D-Galactose 1-phosphate
R01093	C00124 + C00004 + C00080 <=> C01697 + C00003	D-Galactose + NADH + H+ <=> Galactitol + NAD+
R01094	C00124 + C00003 <=> C03383 + C00004 + C00080	D-Galactose + NAD+ <=> D-Galactono-1,4-lactone + NADH + H+
R01095	C00124 + C00005 + C00080 <=> C01697 + C00006	D-Galactose + NADPH + H+ <=> Galactitol + NADP+
R01096	C00124 + C00006 <=> C02669 + C00005 + C00080	D-Galactose + NADP+ <=> D-Galactono-1,5-lactone + NADPH + H+
R01097	C00124 + C00006 <=> C03383 + C00005 + C00080	D-Galactose + NADP+ <=> D-Galactono-1,4-lactone + NADPH + H+
R01098	C00124 + C00007 + C00001 <=> C00880 + C00027	D-Galactose + Oxygen + H2O <=> D-Galactonate + Hydrogen peroxide
R01099	C00124 + C00007 <=> C03269 + C00027	D-Galactose + Oxygen <=> D-galacto-Hexodialdose + Hydrogen peroxide
R01100	C00243 + C00001 <=> C00031 + C00124	Lactose + H2O <=> D-Glucose + D-Galactose
R01101	C05402 + C00001 <=> C00124 + C00031	Melibiose + H2O <=> D-Galactose + D-Glucose
R01103	C00492 + C00001 <=> C00124 + C00089	Raffinose + H2O <=> D-Galactose + Sucrose
R01104	C05401 + C00001 <=> C00124 + C00116	3-beta-D-Galactosyl-sn-glycerol + H2O <=> D-Galactose + Glycerol
R01108	C05422 + 2 C00051 <=> C00127 + C00072	Dehydroascorbate + 2 Glutathione <=> Glutathione disulfide + Ascorbate
R01109	C01420 + 2 C00051 <=> C00127 + 2 C00736	Cystine + 2 Glutathione <=> Glutathione disulfide + 2 Cysteine
R01110	C20788 + 2 C00051 <=> C00127 + 2 C05330	Homocystine + 2 Glutathione <=> Glutathione disulfide + 2 Homocysteine
R01111	C00010 + C00127 <=> C00920 + C00051	CoA + Glutathione disulfide <=> CoA-glutathione + Glutathione
R01113	C00491 + 2 C00051 <=> C00127 + 2 C00097	L-Cystine + 2 Glutathione <=> Glutathione disulfide + 2 L-Cysteine
R01117	C00063 + C00270 <=> C00013 + C00128	CTP + N-Acetylneuraminate <=> Diphosphate + CMP-N-acetylneuraminate
R01121	C00002 + C01143 <=> C00008 + C00009 + C00129 + C00011	ATP + (R)-5-Diphosphomevalonate <=> ADP + Orthophosphate + Isopentenyl diphosphate + CO2
R01123	C00129 <=> C00235	Isopentenyl diphosphate <=> Dimethylallyl diphosphate
R01126	C00130 + C00001 <=> C00294 + C00009	IMP + H2O <=> Inosine + Orthophosphate
R01127	C00130 + C00001 <=> C04734	IMP + H2O <=> 1-(5'-Phosphoribosyl)-5-formamido-4-imidazolecarboxamide
R01128	C00130 + C00001 <=> C00262 + C00117	IMP + H2O <=> Hypoxanthine + D-Ribose 5-phosphate
R01130	C00130 + C00003 + C00001 <=> C00655 + C00004 + C00080	IMP + NAD+ + H2O <=> Xanthosine 5'-phosphate + NADH + H+
R01131	C00002 + C00294 <=> C00008 + C00130	ATP + Inosine <=> ADP + IMP
R01132	C00130 + C00013 <=> C00262 + C00119	IMP + Diphosphate <=> Hypoxanthine + 5-Phospho-alpha-D-ribose 1-diphosphate
R01134	C00130 + C00014 + C00006 <=> C00144 + C00005 + C00080	IMP + Ammonia + NADP+ <=> GMP + NADPH + H+
R01135	C00044 + C00130 + C00049 <=> C00035 + C00009 + C03794	GTP + IMP + L-Aspartate <=> GDP + Orthophosphate + N6-(1,2-Dicarboxyethyl)-AMP
R01137	C00002 + C00206 <=> C00008 + C00131	ATP + dADP <=> ADP + dATP
R01138	C00131 + C00022 <=> C00206 + C00074	dATP + Pyruvate <=> dADP + Phosphoenolpyruvate
R01139	C00131 + C00031 <=> C00206 + C00092	dATP + D-Glucose <=> dADP + D-Glucose 6-phosphate
R01140	C00131 + C00095 <=> C00206 + C00085	dATP + D-Fructose <=> dADP + D-Fructose 6-phosphate
R01142	C01438 + C00007 + C00004 + C00080 <=> C00132 + C00003 + C00001	Methane + Oxygen + NADH + H+ <=> Methanol + NAD+ + H2O
R01143	C01438 + C00007 + C00005 + C00080 <=> C00132 + C00006 + C00001	Methane + Oxygen + NADPH + H+ <=> Methanol + NADP+ + H2O
R01144	C03716 + C00001 <=> C00036 + C00132	Oxaloacetate 4-methyl ester + H2O <=> Oxaloacetate + Methanol
R01145	C02704 + C00001 <=> C00132 + C00059	Monomethyl sulfate + H2O <=> Methanol + Sulfate
R01147	C00647 + C00022 <=> C00018 + C00133	Pyridoxamine phosphate + Pyruvate <=> Pyridoxal phosphate + D-Alanine
R01148	C00133 + C00026 <=> C00022 + C00217	D-Alanine + 2-Oxoglutarate <=> Pyruvate + D-Glutamate
R01149	C00133 + C00064 <=> C00014 + C03738	D-Alanine + L-Glutamine <=> Ammonia + gamma-L-Glutamyl-D-alanine
R01150	C00002 + 2 C00133 <=> C00008 + C00009 + C00993	ATP + 2 D-Alanine <=> ADP + Orthophosphate + D-Alanyl-D-alanine
R01151	C00134 + C00007 + C00001 <=> C00555 + C00014 + C00027	Putrescine + Oxygen + H2O <=> 4-Aminobutyraldehyde + Ammonia + Hydrogen peroxide
R01152	C00436 + C00001 <=> C00134 + C00011 + C00014	N-Carbamoylputrescine + H2O <=> Putrescine + CO2 + Ammonia
R01153	C00019 + C00134 <=> C00021 + C02723	S-Adenosyl-L-methionine + Putrescine <=> S-Adenosyl-L-homocysteine + N-Methylputrescine
R01154	C00024 + C00134 <=> C00010 + C02714	Acetyl-CoA + Putrescine <=> CoA + N-Acetylputrescine
R01155	C00134 + C00026 <=> C00555 + C00025	Putrescine + 2-Oxoglutarate <=> 4-Aminobutyraldehyde + L-Glutamate
R01156	C02714 + C00001 <=> C00033 + C00134	N-Acetylputrescine + H2O <=> Acetate + Putrescine
R01157	C00179 + C00001 <=> C00134 + C00086	Agmatine + H2O <=> Putrescine + Urea
R01158	C00860 + 2 C00003 + C00001 <=> C00135 + 2 C00004 + 2 C00080	L-Histidinol + 2 NAD+ + H2O <=> L-Histidine + 2 NADH + 2 H+
R01159	C00135 + C00019 <=> C01152 + C00021	L-Histidine + S-Adenosyl-L-methionine <=> N(pi)-Methyl-L-histidine + S-Adenosyl-L-homocysteine
R01160	C00024 + C00135 <=> C00010 + C02997	Acetyl-CoA + L-Histidine <=> CoA + N-Acetyl-L-histidine
R01161	C00135 + C00026 <=> C03277 + C00025	L-Histidine + 2-Oxoglutarate <=> Imidazol-5-yl-pyruvate + L-Glutamate
R01163	C01929 + C00001 + C00003 <=> C00135 + C00004 + C00080	L-Histidinal + H2O + NAD+ <=> L-Histidine + NADH + H+
R01164	C00002 + C00135 + C00099 <=> C00008 + C00009 + C00386	ATP + L-Histidine + beta-Alanine <=> ADP + Orthophosphate + Carnosine
R01166	C00386 + C00001 <=> C00099 + C00135	Carnosine + H2O <=> beta-Alanine + L-Histidine
R01167	C00135 <=> C00388 + C00011	L-Histidine <=> Histamine + CO2
R01168	C00135 <=> C00785 + C00014	L-Histidine <=> Urocanate + Ammonia
R01169	C00135 + 3 C00019 + C00080 <=> C05575 + 3 C00021	L-Histidine + 3 S-Adenosyl-L-methionine + H+ <=> Hercynine + 3 S-Adenosyl-L-homocysteine
R01171	C00136 + C00003 <=> C00877 + C00004 + C00080	Butanoyl-CoA + NAD+ <=> Crotonoyl-CoA + NADH + H+
R01172	C01412 + C00010 + C00003 <=> C00136 + C00004 + C00080	Butanal + CoA + NAD+ <=> Butanoyl-CoA + NADH + H+
R01173	C01412 + C00010 + C00006 <=> C00136 + C00005 + C00080	Butanal + CoA + NADP+ <=> Butanoyl-CoA + NADPH + H+
R01174	C00136 + C00009 <=> C00010 + C02527	Butanoyl-CoA + Orthophosphate <=> CoA + Butanoylphosphate
R01175	C00136 + C00016 <=> C01352 + C00877	Butanoyl-CoA + FAD <=> FADH2 + Crotonoyl-CoA
R01176	C00002 + C00246 + C00010 <=> C00020 + C00013 + C00136	ATP + Butanoic acid + CoA <=> AMP + Diphosphate + Butanoyl-CoA
R01177	C00024 + C00136 <=> C00010 + C05269	Acetyl-CoA + Butanoyl-CoA <=> CoA + 3-Oxohexanoyl-CoA
R01179	C00136 + C00033 <=> C00246 + C00024	Butanoyl-CoA + Acetate <=> Butanoic acid + Acetyl-CoA
R01180	C01989 + C00010 <=> C00136 + C00001 + C00048	3-Ethylmalate + CoA <=> Butanoyl-CoA + H2O + Glyoxylate
R01181	C00630 <=> C00136	2-Methylpropanoyl-CoA <=> Butanoyl-CoA
R01183	C00137 + C00003 <=> C00691 + C00004 + C00080	myo-Inositol + NAD+ <=> 2,4,6/3,5-Pentahydroxycyclohexanone + NADH + H+
R01184	C00137 + C00007 <=> C00191 + C00001	myo-Inositol + Oxygen <=> D-Glucuronate + H2O
R01185	C01177 + C00001 <=> C00137 + C00009	Inositol 1-phosphate + H2O <=> myo-Inositol + Orthophosphate
R01186	C03546 + C00001 <=> C00137 + C00009	myo-Inositol 4-phosphate + H2O <=> myo-Inositol + Orthophosphate
R01187	C04006 + C00001 <=> C00137 + C00009	1D-myo-Inositol 3-phosphate + H2O <=> myo-Inositol + Orthophosphate
R01188	C00019 + C00137 <=> C00021 + C03659	S-Adenosyl-L-methionine + myo-Inositol <=> S-Adenosyl-L-homocysteine + D-Bornesitol
R01189	C00019 + C00137 <=> C00021 + C03660	S-Adenosyl-L-methionine + myo-Inositol <=> S-Adenosyl-L-homocysteine + L-Bornesitol
R01190	C00019 + C00137 <=> C00021 + C06352	S-Adenosyl-L-methionine + myo-Inositol <=> S-Adenosyl-L-homocysteine + 4-O-Methyl-myo-inositol
R01192	C00052 + C00137 <=> C00015 + C01235	UDP-alpha-D-galactose + myo-Inositol <=> UDP + alpha-D-Galactosyl-(1->3)-1D-myo-inositol
R01193	C01225 + C00001 <=> C00137 + C00093	sn-Glycero-3-phospho-1-inositol + H2O <=> myo-Inositol + sn-Glycerol 3-phosphate
R01194	C01235 + C00001 <=> C00137 + C00124	alpha-D-Galactosyl-(1->3)-1D-myo-inositol + H2O <=> myo-Inositol + D-Galactose
R01200	C00140 + C00001 <=> C00329 + C00033	N-Acetyl-D-glucosamine + H2O <=> D-Glucosamine + Acetate
R01201	C00002 + C00140 <=> C00008 + C00357	ATP + N-Acetyl-D-glucosamine <=> ADP + N-Acetyl-D-glucosamine 6-phosphate
R01202	C20328 + C00003 + C00001 <=> C01133 + C00004 + C00080	N-Acetyl-alpha-D-glucosamine + NAD+ + H2O <=> N-Acetyl-D-glucosaminate + NADH + H+
R01203	C00140 + C00007 + C00001 <=> C01133 + C00027	N-Acetyl-D-glucosamine + Oxygen + H2O <=> N-Acetyl-D-glucosaminate + Hydrogen peroxide
R01204	C00024 + C00329 <=> C00010 + C00140	Acetyl-CoA + D-Glucosamine <=> CoA + N-Acetyl-D-glucosamine
R01205	C00052 + C00140 <=> C00015 + C00611	UDP-alpha-D-galactose + N-Acetyl-D-glucosamine <=> UDP + N-Acetyllactosamine
R01207	C00140 <=> C00645	N-Acetyl-D-glucosamine <=> N-Acetyl-D-mannosamine
R01209	C04039 <=> C00141 + C00001	2,3-Dihydroxy-3-methylbutanoate <=> 3-Methyl-2-oxobutanoic acid + H2O
R01210	C00141 + C00010 + C00003 <=> C00630 + C00011 + C00004 + C00080	3-Methyl-2-oxobutanoic acid + CoA + NAD+ <=> 2-Methylpropanoyl-CoA + CO2 + NADH + H+
R01211	C01088 + C00003 <=> C00141 + C00011 + C00004 + C00080	(R)-3,3-Dimethylmalate + NAD+ <=> 3-Methyl-2-oxobutanoic acid + CO2 + NADH + H+
R01212	C00183 + C00006 + C00001 <=> C00141 + C00014 + C00005 + C00080	L-Valine + NADP+ + H2O <=> 3-Methyl-2-oxobutanoic acid + Ammonia + NADPH + H+
R01213	C02504 + C00010 <=> C00024 + C00141 + C00001	alpha-Isopropylmalate + CoA <=> Acetyl-CoA + 3-Methyl-2-oxobutanoic acid + H2O
R01214	C00183 + C00026 <=> C00141 + C00025	L-Valine + 2-Oxoglutarate <=> 3-Methyl-2-oxobutanoic acid + L-Glutamate
R01215	C00183 + C00022 <=> C00141 + C00041	L-Valine + Pyruvate <=> 3-Methyl-2-oxobutanoic acid + L-Alanine
R01216	C00966 <=> C00141 + C00067	2-Dehydropantoate <=> 3-Methyl-2-oxobutanoic acid + Formaldehyde
R01218	C00143 + C00003 <=> C00445 + C00004	5,10-Methylenetetrahydrofolate + NAD+ <=> 5,10-Methenyltetrahydrofolate + NADH
R01220	C00143 + C00006 <=> C00445 + C00005	5,10-Methylenetetrahydrofolate + NADP+ <=> 5,10-Methenyltetrahydrofolate + NADPH
R01221	C00037 + C00101 + C00003 <=> C00143 + C00014 + C00011 + C00004 + C00080	Glycine + Tetrahydrofolate + NAD+ <=> 5,10-Methylenetetrahydrofolate + Ammonia + CO2 + NADH + H+
R01224	C00440 + C00006 <=> C00143 + C00005 + C00080	5-Methyltetrahydrofolate + NADP+ <=> 5,10-Methylenetetrahydrofolate + NADPH + H+
R01225	C00143 + C00133 + C00001 <=> C00101 + C02115	5,10-Methylenetetrahydrofolate + D-Alanine + H2O <=> Tetrahydrofolate + 2-Methylserine
R01226	C00143 + C00141 + C00001 <=> C00101 + C00966	5,10-Methylenetetrahydrofolate + 3-Methyl-2-oxobutanoic acid + H2O <=> Tetrahydrofolate + 2-Dehydropantoate
R01227	C00144 + C00001 <=> C00387 + C00009	GMP + H2O <=> Guanosine + Orthophosphate
R01228	C00002 + C00387 <=> C00008 + C00144	ATP + Guanosine <=> ADP + GMP
R01229	C00144 + C00013 <=> C00242 + C00119	GMP + Diphosphate <=> Guanine + 5-Phospho-alpha-D-ribose 1-diphosphate
R01230	C00002 + C00655 + C00014 <=> C00020 + C00013 + C00144	ATP + Xanthosine 5'-phosphate + Ammonia <=> AMP + Diphosphate + GMP
R01231	C00002 + C00655 + C00064 + C00001 <=> C00020 + C00013 + C00144 + C00025	ATP + Xanthosine 5'-phosphate + L-Glutamine + H2O <=> AMP + Diphosphate + GMP + L-Glutamate
R01232	C01261 + C00001 <=> C00044 + C00144	P1,P4-Bis(5'-guanosyl) tetraphosphate + H2O <=> GTP + GMP
R01233	C00394 + C00001 <=> C00144 + C00103	GDP-glucose + H2O <=> GMP + D-Glucose 1-phosphate
R01234	C00942 + C00001 <=> C00144	3',5'-Cyclic GMP + H2O <=> GMP
R01238	C00156 <=> C00146 + C00011	4-Hydroxybenzoate <=> Phenol + CO2
R01239	C00019 + C00146 <=> C00021 + C01403	S-Adenosyl-L-methionine + Phenol <=> S-Adenosyl-L-homocysteine + Anisole
R01240	C00029 + C15584 <=> C00015 + C03097	UDP-glucose + Phenol <=> UDP + Aryl beta-D-glucoside
R01241	C00146 + C00033 <=> C00548 + C00001	Phenol + Acetate <=> Phenyl acetate + H2O
R01242	C00053 + C15584 <=> C00054 + C00850	3'-Phosphoadenylyl sulfate + Phenol <=> Adenosine 3',5'-bisphosphate + Aryl sulfate
R01243	C00850 + C00001 <=> C15584 + C00059	Aryl sulfate + H2O <=> Phenol + Sulfate
R01244	C00147 + C00001 <=> C00262 + C00014	Adenine + H2O <=> Hypoxanthine + Ammonia
R01245	C00212 + C00001 <=> C00147 + C00121	Adenosine + H2O <=> Adenine + D-Ribose
R01246	C00148 + C00003 <=> C03564 + C00004 + C00080	L-Proline + NAD+ <=> 1-Pyrroline-2-carboxylate + NADH + H+
R01248	C00148 + C00003 <=> C03912 + C00004 + C00080	L-Proline + NAD+ <=> (S)-1-Pyrroline-5-carboxylate + NADH + H+
R01249	C00148 + C00006 <=> C03564 + C00005 + C00080	L-Proline + NADP+ <=> 1-Pyrroline-2-carboxylate + NADPH + H+
R01251	C00148 + C00006 <=> C03912 + C00005 + C00080	L-Proline + NADP+ <=> (S)-1-Pyrroline-5-carboxylate + NADPH + H+
R01252	C00148 + C00026 + C00007 <=> C01157 + C00042 + C00011	L-Proline + 2-Oxoglutarate + Oxygen <=> Hydroxyproline + Succinate + CO2
R01255	C00148 <=> C00763	L-Proline <=> D-Proline
R01256	C00002 + C00149 + C00010 <=> C00008 + C00009 + C04348	ATP + (S)-Malate + CoA <=> ADP + Orthophosphate + L-Malyl-CoA
R01257	C00149 + C00016 <=> C00036 + C01352	(S)-Malate + FAD <=> Oxaloacetate + FADH2
R01266	C04540 + C00001 <=> C00140 + C00152	N4-(Acetyl-beta-D-glucosaminyl)asparagine + H2O <=> N-Acetyl-D-glucosamine + L-Asparagine
R01267	C00152 <=> C02512 + C00001	L-Asparagine <=> 3-Cyano-L-alanine + H2O
R01268	C00153 + C00001 <=> C00253 + C00014	Nicotinamide + H2O <=> Nicotinate + Ammonia
R01269	C00019 + C00153 + C00080 <=> C00021 + C02918	S-Adenosyl-L-methionine + Nicotinamide + H+ <=> S-Adenosyl-L-homocysteine + 1-Methylnicotinamide
R01270	C00455 + C00001 <=> C00153 + C00117	Nicotinamide D-ribonucleotide + H2O <=> Nicotinamide + D-Ribose 5-phosphate
R01271	C00455 + C00013 <=> C00153 + C00119	Nicotinamide D-ribonucleotide + Diphosphate <=> Nicotinamide + 5-Phospho-alpha-D-ribose 1-diphosphate
R01273	C03150 + C00001 <=> C00153 + C00121	Nicotinamide-beta-riboside + H2O <=> Nicotinamide + D-Ribose
R01274	C00154 + C00001 <=> C00010 + C00249	Palmitoyl-CoA + H2O <=> CoA + Hexadecanoic acid
R01277	C00517 + C00010 + C00003 <=> C00154 + C00004 + C00080	Hexadecanal + CoA + NAD+ <=> Palmitoyl-CoA + NADH + H+
R01278	C00154 + C00006 <=> C05272 + C00005 + C00080	Palmitoyl-CoA + NADP+ <=> trans-Hexadec-2-enoyl-CoA + NADPH + H+
R01279	C00154 + C00016 <=> C05272 + C01352	Palmitoyl-CoA + FAD <=> trans-Hexadec-2-enoyl-CoA + FADH2
R01280	C00002 + C00249 + C00010 <=> C00020 + C00154 + C00013	ATP + Hexadecanoic acid + CoA <=> AMP + Palmitoyl-CoA + Diphosphate
R01281	C00154 + C00065 <=> C02934 + C00010 + C00011	Palmitoyl-CoA + L-Serine <=> 3-Dehydrosphinganine + CoA + CO2
R01283	C00155 + C00001 <=> C00283 + C00014 + C00109	L-Homocysteine + H2O <=> Hydrogen sulfide + Ammonia + 2-Oxobutanoate
R01286	C02291 + C00001 <=> C00155 + C00014 + C00022	L-Cystathionine + H2O <=> L-Homocysteine + Ammonia + Pyruvate
R01287	C01077 + C00283 <=> C00155 + C00033	O-Acetyl-L-homoserine + Hydrogen sulfide <=> L-Homocysteine + Acetate
R01288	C01118 + C00283 <=> C00155 + C00042	O-Succinyl-L-homoserine + Hydrogen sulfide <=> L-Homocysteine + Succinate
R01289	C00065 + C00155 <=> C00542 + C00001	L-Serine + L-Homocysteine <=> Cystathionine + H2O
R01290	C00065 + C00155 <=> C02291 + C00001	L-Serine + L-Homocysteine <=> L-Cystathionine + H2O
R01291	C03539 <=> C11838 + C00155	S-Ribosyl-L-homocysteine <=> (S)-4,5-Dihydroxypentane-2,3-dione + L-Homocysteine
R01292	C01817 + 2 C00051 <=> 2 C00155 + C00127	L-Homocystine + 2 Glutathione <=> 2 L-Homocysteine + Glutathione disulfide
R01293	C00633 + C00003 + C00001 <=> C00156 + C00004 + C00080	4-Hydroxybenzaldehyde + NAD+ + H2O <=> 4-Hydroxybenzoate + NADH + H+
R01294	C00633 + C00006 + C00001 <=> C00156 + C00005 + C00080	4-Hydroxybenzaldehyde + NADP+ + H2O <=> 4-Hydroxybenzoate + NADPH + H+
R01295	C00180 + C00007 + C00005 + C00080 <=> C00156 + C00006 + C00001	Benzoate + Oxygen + NADPH + H+ <=> 4-Hydroxybenzoate + NADP+ + H2O
R01296	C00156 + C00007 + C00004 + C00080 <=> C00230 + C00003 + C00001	4-Hydroxybenzoate + Oxygen + NADH + H+ <=> 3,4-Dihydroxybenzoate + NAD+ + H2O
R01297	C00156 + C00007 + C00004 + C00080 <=> C00530 + C00011 + C00003 + C00001	4-Hydroxybenzoate + Oxygen + NADH + H+ <=> Hydroquinone + CO2 + NAD+ + H2O
R01298	C00156 + C00007 + C00005 + C00080 <=> C00230 + C00006 + C00001	4-Hydroxybenzoate + Oxygen + NADPH + H+ <=> 3,4-Dihydroxybenzoate + NADP+ + H2O
R01299	C00156 + C00007 + C00005 + C00080 <=> C00530 + C00011 + C00006 + C00001	4-Hydroxybenzoate + Oxygen + NADPH + H+ <=> Hydroquinone + CO2 + NADP+ + H2O
R01300	C00002 + C00156 + C00010 <=> C00020 + C00013 + C02949	ATP + 4-Hydroxybenzoate + CoA <=> AMP + Diphosphate + 4-Hydroxybenzoyl-CoA
R01301	C02949 + C00001 <=> C00156 + C00010	4-Hydroxybenzoyl-CoA + H2O <=> 4-Hydroxybenzoate + CoA
R01302	C00156 + C00022 <=> C00251	4-Hydroxybenzoate + Pyruvate <=> Chorismate
R01304	C00029 + C00156 <=> C00015 + C03993	UDP-glucose + 4-Hydroxybenzoate <=> UDP + 4-(beta-D-Glucosyloxy)benzoate
R01305	C13635 + C00007 <=> C00156 + C00058	4-Hydroxyphenacyl alcohol + Oxygen <=> 4-Hydroxybenzoate + Formate
R01307	C02370 + C00001 <=> C00156 + C00698 + C00080	4-Chlorobenzoate + H2O <=> 4-Hydroxybenzoate + Cl- + H+
R01308	C00156 + C00033 + C00004 + C00080 <=> C00811 + 2 C00001 + C00003	4-Hydroxybenzoate + Acetate + NADH + H+ <=> 4-Coumarate + 2 H2O + NAD+
R01322	C00002 + C00158 + C00010 <=> C00008 + C00009 + C00566	ATP + Citrate + CoA <=> ADP + Orthophosphate + (3S)-Citryl-CoA
R01323	C00024 + C00158 <=> C00033 + C00566	Acetyl-CoA + Citrate <=> Acetate + (3S)-Citryl-CoA
R01324	C00158 <=> C00311	Citrate <=> Isocitrate
R01325	C00158 <=> C00417 + C00001	Citrate <=> cis-Aconitate + H2O
R01326	C00002 + C00159 <=> C00008 + C00275	ATP + D-Mannose <=> ADP + D-Mannose 6-phosphate
R01327	C00081 + C00159 <=> C00104 + C00275	ITP + D-Mannose <=> IDP + D-Mannose 6-phosphate
R01329	C05400 + C00001 <=> C00159 + C00124	Epimelibiose + H2O <=> D-Mannose + D-Galactose
R01330	C00131 + C00159 <=> C00206 + C00275	dATP + D-Mannose <=> dADP + D-Mannose 6-phosphate
R01333	C00266 + C00003 + C00001 <=> C00160 + C00004 + C00080	Glycolaldehyde + NAD+ + H2O <=> Glycolate + NADH + H+
R01334	C00988 + C00001 <=> C00160 + C00009	2-Phosphoglycolate + H2O <=> Glycolate + Orthophosphate
R01335	C00160 + C00022 <=> C05406 + C00001	Glycolate + Pyruvate <=> 5-Hydroxy-2,4-dioxopentanoate + H2O
R01336	C03600 <=> C00122 + C00160	Carboxymethyloxysuccinate <=> Fumarate + Glycolate
R01353	C00002 + C00163 <=> C00008 + C02876	ATP + Propanoate <=> ADP + Propanoyl phosphate
R01354	C00002 + C00163 <=> C00013 + C05983	ATP + Propanoate <=> Diphosphate + Propionyladenylate
R01355	C03652 <=> C00163 + C00022	(2R,3S)-2,3-Dimethylmalate <=> Propanoate + Pyruvate
R01357	C00002 + C00164 + C00010 <=> C00020 + C00013 + C00332	ATP + Acetoacetate + CoA <=> AMP + Diphosphate + Acetoacetyl-CoA
R01358	C00332 + C00001 <=> C00164 + C00010	Acetoacetyl-CoA + H2O <=> Acetoacetate + CoA
R01359	C00332 + C00033 <=> C00164 + C00024	Acetoacetyl-CoA + Acetate <=> Acetoacetate + Acetyl-CoA
R01360	C00356 <=> C00024 + C00164	(S)-3-Hydroxy-3-methylglutaryl-CoA <=> Acetyl-CoA + Acetoacetate
R01361	C01089 + C00003 <=> C00164 + C00004 + C00080	(R)-3-Hydroxybutanoate + NAD+ <=> Acetoacetate + NADH + H+
R01364	C00164 + C00122 <=> C01061 + C00001	Acetoacetate + Fumarate <=> 4-Fumarylacetoacetate + H2O
R01365	C00136 + C00164 <=> C00246 + C00332	Butanoyl-CoA + Acetoacetate <=> Butanoic acid + Acetoacetyl-CoA
R01366	C00164 <=> C00207 + C00011	Acetoacetate <=> Acetone + CO2
R01367	C00164 <=> C06144 + C00001	Acetoacetate <=> 3-Butynoate + H2O
R01370	C05607 + C00003 <=> C00166 + C00004 + C00080	Phenyllactate + NAD+ <=> Phenylpyruvate + NADH + H+
R01371	C05607 + C00006 <=> C00166 + C00005 + C00080	Phenyllactate + NADP+ <=> Phenylpyruvate + NADPH + H+
R01372	C00166 + C00007 <=> C05852 + C00011	Phenylpyruvate + Oxygen <=> 2-Hydroxyphenylacetate + CO2
R01373	C00254 <=> C00166 + C00001 + C00011	Prephenate <=> Phenylpyruvate + H2O + CO2
R01375	C00064 + C00166 <=> C00940 + C00079	L-Glutamine + Phenylpyruvate <=> 2-Oxoglutaramate + L-Phenylalanine
R01376	C00078 + C00166 <=> C00331 + C00079	L-Tryptophan + Phenylpyruvate <=> Indolepyruvate + L-Phenylalanine
R01377	C00166 <=> C00601 + C00011	Phenylpyruvate <=> Phenylacetaldehyde + CO2
R01378	C00166 <=> C02763	Phenylpyruvate <=> 2-Hydroxy-3-phenylpropenoate
R01381	C00075 + C05385 <=> C00013 + C00167	UTP + D-Glucuronate 1-phosphate <=> Diphosphate + UDP-glucuronate
R01384	C00167 <=> C00190 + C00011	UDP-glucuronate <=> UDP-D-xylose + CO2
R01385	C00167 <=> C00617	UDP-glucuronate <=> UDP-D-galacturonate
R01386	C00167 <=> C01623 + C00011	UDP-glucuronate <=> UDP-apiose + CO2
R01387	C00167 <=> C02330	UDP-glucuronate <=> UDP-L-iduronate
R01388	C00258 + C00003 <=> C00168 + C00004 + C00080	D-Glycerate + NAD+ <=> Hydroxypyruvate + NADH + H+
R01390	C00168 + C00011 <=> C00975	Hydroxypyruvate + CO2 <=> Dihydroxyfumarate
R01392	C00258 + C00006 <=> C00168 + C00005 + C00080	D-Glycerate + NADP+ <=> Hydroxypyruvate + NADPH + H+
R01393	C00168 <=> C00266 + C00011	Hydroxypyruvate <=> Glycolaldehyde + CO2
R01394	C00168 <=> C01146	Hydroxypyruvate <=> 2-Hydroxy-3-oxopropanoate
R01395	C00002 + C01563 <=> C00008 + C00169	ATP + Carbamate <=> ADP + Carbamoyl phosphate
R01396	C00169 + C00047 <=> C00009 + C02427	Carbamoyl phosphate + L-Lysine <=> Orthophosphate + L-Homocitrulline
R01397	C00169 + C00049 <=> C00009 + C00438	Carbamoyl phosphate + L-Aspartate <=> Orthophosphate + N-Carbamoyl-L-aspartate
R01398	C00169 + C00077 <=> C00009 + C00327	Carbamoyl phosphate + L-Ornithine <=> Orthophosphate + L-Citrulline
R01399	C00169 + C00134 <=> C00009 + C00436	Carbamoyl phosphate + Putrescine <=> Orthophosphate + N-Carbamoylputrescine
R01401	C00170 + C00001 <=> C00147 + C03089	5'-Methylthioadenosine + H2O <=> Adenine + 5-Methylthio-D-ribose
R01402	C00170 + C00009 <=> C00147 + C04188	5'-Methylthioadenosine + Orthophosphate <=> Adenine + S-Methyl-5-thio-D-ribose 1-phosphate
R01408	C00488 <=> C01326 + C00001	Formamide <=> Hydrogen cyanide + H2O
R01410	C01326 + C00084 + C00014 <=> C05714 + C00001	Hydrogen cyanide + Acetaldehyde + Ammonia <=> alpha-Aminopropiononitrile + H2O
R01411	C02376 + C00001 <=> C00178 + C00014	5-Methylcytosine + H2O <=> Thymine + Ammonia
R01412	C00178 + C00026 + C00007 <=> C03088 + C00042 + C00011	Thymine + 2-Oxoglutarate + Oxygen <=> 5-Hydroxymethyluracil + Succinate + CO2
R01414	C00906 + C00003 <=> C00178 + C00004 + C00080	5,6-Dihydrothymine + NAD+ <=> Thymine + NADH + H+
R01415	C21028 + C00006 <=> C00178 + C00005 + C00080	(R)-5,6-Dihydrothymine + NADP+ <=> Thymine + NADPH + H+
R01416	C00179 + C00001 <=> C00436 + C00014	Agmatine + H2O <=> N-Carbamoylputrescine + Ammonia
R01417	C00002 + C00179 <=> C00008 + C02726	ATP + Agmatine <=> ADP + Phosphoagmatine
R01418	C00179 + C00086 <=> C03047 + C00001	Agmatine + Urea <=> Arcaine + H2O
R01419	C00261 + C00003 + C00001 <=> C00180 + C00004 + C00080	Benzaldehyde + NAD+ + H2O <=> Benzoate + NADH + H+
R01420	C00261 + C00006 + C00001 <=> C00180 + C00005 + C00080	Benzaldehyde + NADP+ + H2O <=> Benzoate + NADPH + H+
R01421	C06206 + C00001 <=> C00180 + C00009	Benzoyl phosphate + H2O <=> Benzoate + Orthophosphate
R01422	C00002 + C00180 + C00010 <=> C00020 + C00013 + C00512	ATP + Benzoate + CoA <=> AMP + Diphosphate + Benzoyl-CoA
R01423	C06433 + C00001 <=> C00020 + C00180	5'-Benzoylphosphoadenosine + H2O <=> AMP + Benzoate
R01424	C01586 + C00001 <=> C00180 + C00037	Hippurate + H2O <=> Benzoate + Glycine
R01425	C02253 + C00001 <=> C00180 + C00179	Benzoylagmatine + H2O <=> Benzoate + Agmatine
R01426	C00180 + C00033 + C00004 + C00080 <=> C00423 + 2 C00001 + C00003	Benzoate + Acetate + NADH + H+ <=> trans-Cinnamate + 2 H2O + NAD+
R01429	C00181 + C00003 <=> C02266 + C00004 + C00080	D-Xylose + NAD+ <=> D-Xylonolactone + NADH + H+
R01430	C00181 + C00006 <=> C02266 + C00005 + C00080	D-Xylose + NADP+ <=> D-Xylonolactone + NADPH + H+
R01431	C00379 + C00006 <=> C00181 + C00005 + C00080	Xylitol + NADP+ <=> D-Xylose + NADPH + H+
R01432	C00181 <=> C00310	D-Xylose <=> D-Xylulose
R01434	C00183 + C00001 + C00003 <=> C00141 + C00014 + C00004 + C00080	L-Valine + H2O + NAD+ <=> 3-Methyl-2-oxobutanoic acid + Ammonia + NADH + H+
R01437	C00183 <=> C02787 + C00011	L-Valine <=> 2-Methylpropanamine + CO2
R01440	C00231 + C00067 <=> C00118 + C00184	D-Xylulose 5-phosphate + Formaldehyde <=> D-Glyceraldehyde 3-phosphate + Glycerone
R01441	C00002 + C00185 <=> C00008 + C04534	ATP + Cellobiose <=> ADP + 6-Phospho-beta-D-glucosyl-(1,4)-D-glucose
R01442	C00185 + C00007 <=> C01093 + C00027	Cellobiose + Oxygen <=> Cellobiono-1,5-lactone + Hydrogen peroxide
R01444	C06219 + C00001 <=> C00185 + C00031	Cellotriose + H2O <=> Cellobiose + D-Glucose
R01445	C00185 <=> C02964	Cellobiose <=> 4-O-beta-D-Glucopyranosyl-D-mannose
R01446	C00424 + C00003 + C00001 <=> C00186 + C00004 + C00080	(S)-Lactaldehyde + NAD+ + H2O <=> (S)-Lactate + NADH + H+
R01447	C00186 + C00036 <=> C00149 + C00022	(S)-Lactate + Oxaloacetate <=> (S)-Malate + Pyruvate
R01448	C17205 + C00001 <=> C00256 + C00059	(R)-2-O-Sulfolactate + H2O <=> (R)-Lactate + Sulfate
R01449	C00827 + C00163 <=> C00186 + C00100	Lactoyl-CoA + Propanoate <=> (S)-Lactate + Propanoyl-CoA
R01450	C00186 <=> C00256	(S)-Lactate <=> (R)-Lactate
R01451	C00187 + C00003 <=> C01164 + C00004 + C00080	Cholesterol + NAD+ <=> 7-Dehydrocholesterol + NADH + H+
R01452	C00187 + C00007 + C00005 + C00080 <=> C15992 + C00006 + C00001	Cholesterol + Oxygen + NADPH + H+ <=> Cholesterol-5alpha,6alpha-epoxide + NADP+ + H2O
R01453	C00187 + C00007 + C00005 + C00080 <=> C05418 + C00006 + C00001	Cholesterol + Oxygen + NADPH + H+ <=> Cholesterol-5beta,6beta-epoxide + NADP+ + H2O
R01456	C00187 + C00006 <=> C01164 + C00005 + C00080	Cholesterol + NADP+ <=> 7-Dehydrocholesterol + NADPH + H+
R01457	C00187 + C00006 <=> C01802 + C00080 + C00005	Cholesterol + NADP+ <=> Desmosterol + H+ + NADPH
R01459	C00187 + C00007 <=> C00599 + C00027	Cholesterol + Oxygen <=> Cholest-4-en-3-one + Hydrogen peroxide
R01460	C03855 + C00001 <=> C00187 + C00031	Cholesteryl-beta-D-glucoside + H2O <=> Cholesterol + D-Glucose
R01465	C00188 + C00003 <=> C03508 + C00004 + C00080	L-Threonine + NAD+ <=> L-2-Amino-3-oxobutanoic acid + NADH + H+
R01466	C01102 + C00001 <=> C00188 + C00009	O-Phospho-L-homoserine + H2O <=> L-Threonine + Orthophosphate
R01467	C00188 <=> C00820	L-Threonine <=> D-Threonine
R01468	C00002 + C00189 <=> C00008 + C00346	ATP + Ethanolamine <=> ADP + Ethanolamine phosphate
R01469	C00189 + C00001 + C00007 <=> C00266 + C00014 + C00027	Ethanolamine + H2O + Oxygen <=> Glycolaldehyde + Ammonia + Hydrogen peroxide
R01470	C01233 + C00001 <=> C00189 + C00093	sn-Glycero-3-phosphoethanolamine + H2O <=> Ethanolamine + sn-Glycerol 3-phosphate
R01471	C00075 + C03737 <=> C00013 + C00190	UTP + alpha-D-Xylose 1-phosphate <=> Diphosphate + UDP-D-xylose
R01473	C00935 <=> C00190	UDP-L-arabinose <=> UDP-D-xylose
R01476	C00002 + C00191 <=> C00008 + C05385	ATP + D-Glucuronate <=> ADP + D-Glucuronate 1-phosphate
R01481	C00800 + C00006 <=> C00191 + C00005 + C00080	L-Gulonate + NADP+ <=> D-Glucuronate + NADPH + H+
R01482	C00191 <=> C00905	D-Glucuronate <=> D-Fructuronate
R01483	C02670 + C00001 <=> C00191	D-Glucuronolactone + H2O <=> D-Glucuronate
R01484	C03387 + C00001 <=> C00191	D-Glucurono-6,2-lactone + H2O <=> D-Glucuronate
R01485	C00152 + C00192 <=> C00014 + C03124	L-Asparagine + Hydroxylamine <=> Ammonia + beta-L-Aspartylhydroxamate
R01486	C00193 + C00003 + C00001 <=> C00539 + C00004 + C00080	Aromatic aldehyde + NAD+ + H2O <=> Aromatic acid + NADH + H+
R01487	C03485 + C00003 <=> C00193 + C00004 + C00080	Aromatic primary alcohol + NAD+ <=> Aromatic aldehyde + NADH + H+
R01488	C03485 + C00006 <=> C00193 + C00005 + C00080	Aromatic primary alcohol + NADP+ <=> Aromatic aldehyde + NADPH + H+
R01489	C00193 + C00007 + C00001 <=> C00539 + C00027	Aromatic aldehyde + Oxygen + H2O <=> Aromatic acid + Hydrogen peroxide
R01490	C00193 + C00020 + C00013 + C00006 <=> C00539 + C00005 + C00002 + C00080	Aromatic aldehyde + AMP + Diphosphate + NADP+ <=> Aromatic acid + NADPH + ATP + H+
R01491	C03485 + C00007 <=> C00193 + C00027	Aromatic primary alcohol + Oxygen <=> Aromatic aldehyde + Hydrogen peroxide
R01492	C00002 + C00853 <=> C00536 + C00194	ATP + Cob(I)alamin <=> Triphosphate + Cobamide coenzyme
R01504	C00002 + C00196 <=> C00013 + C04030	ATP + 2,3-Dihydroxybenzoate <=> Diphosphate + (2,3-Dihydroxybenzoyl)adenylate
R01505	C04171 + C00003 <=> C00196 + C00004 + C00080	(2S,3S)-2,3-Dihydro-2,3-dihydroxybenzoate + NAD+ <=> 2,3-Dihydroxybenzoate + NADH + H+
R01506	C00196 + C00007 <=> C03666	2,3-Dihydroxybenzoate + Oxygen <=> 2-Carboxy-cis,cis-muconate
R01507	C00196 + C00007 <=> C04480	2,3-Dihydroxybenzoate + Oxygen <=> 3-Carboxy-2-hydroxymuconate semialdehyde
R01511	C00197 + C00001 <=> C00258 + C00009	3-Phospho-D-glycerate + H2O <=> D-Glycerate + Orthophosphate
R01512	C00002 + C00197 <=> C00008 + C00236	ATP + 3-Phospho-D-glycerate <=> ADP + 3-Phospho-D-glyceroyl phosphate
R01513	C00197 + C00003 <=> C03232 + C00004 + C00080	3-Phospho-D-glycerate + NAD+ <=> 3-Phosphonooxypyruvate + NADH + H+
R01514	C00002 + C00258 <=> C00008 + C00197	ATP + D-Glycerate <=> ADP + 3-Phospho-D-glycerate
R01515	C00236 + C00001 <=> C00197 + C00009	3-Phospho-D-glyceroyl phosphate + H2O <=> 3-Phospho-D-glycerate + Orthophosphate
R01517	C00044 + C00197 <=> C00035 + C00236	GTP + 3-Phospho-D-glycerate <=> GDP + 3-Phospho-D-glyceroyl phosphate
R01518	C00631 <=> C00197	2-Phospho-D-glycerate <=> 3-Phospho-D-glycerate
R01519	C00198 + C00001 <=> C00257	D-Glucono-1,5-lactone + H2O <=> D-Gluconic acid
R01520	C00221 + C00003 <=> C00198 + C00004 + C00080	beta-D-Glucose + NAD+ <=> D-Glucono-1,5-lactone + NADH + H+
R01521	C00221 + C00006 <=> C00198 + C00005 + C00080	beta-D-Glucose + NADP+ <=> D-Glucono-1,5-lactone + NADPH + H+
R01522	C00221 + C00007 <=> C00198 + C00027	beta-D-Glucose + Oxygen <=> D-Glucono-1,5-lactone + Hydrogen peroxide
R01523	C00002 + C00199 <=> C00008 + C01182	ATP + D-Ribulose 5-phosphate <=> ADP + D-Ribulose 1,5-bisphosphate
R01524	C01068 + C00003 <=> C00199 + C00004 + C00080	D-Ribitol 5-phosphate + NAD+ <=> D-Ribulose 5-phosphate + NADH + H+
R01525	C01068 + C00006 <=> C00199 + C00005 + C00080	D-Ribitol 5-phosphate + NADP+ <=> D-Ribulose 5-phosphate + NADPH + H+
R01526	C00002 + C00309 <=> C00008 + C00199	ATP + D-Ribulose <=> ADP + D-Ribulose 5-phosphate
R01528	C00345 + C00006 <=> C00199 + C00011 + C00005 + C00080	6-Phospho-D-gluconate + NADP+ <=> D-Ribulose 5-phosphate + CO2 + NADPH + H+
R01529	C00199 <=> C00231	D-Ribulose 5-phosphate <=> D-Xylulose 5-phosphate
R01530	C01112 <=> C00199	D-Arabinose 5-phosphate <=> D-Ribulose 5-phosphate
R01533	C00202 + C00001 <=> C03113 + C16487	Isoflurophate + H2O <=> Diisopropyl phosphate + Hydrofluoric acid
R01535	C00052 + C17556 <=> C00105 + C04507	UDP-alpha-D-galactose + di-trans,poly-cis-Undecaprenyl phosphate <=> UMP + alpha-D-Galactosyl-diphosphoundecaprenol
R01538	C00257 <=> C00204 + C00001	D-Gluconic acid <=> 2-Dehydro-3-deoxy-D-gluconate + H2O
R01540	C00817 <=> C00204 + C00001	D-Altronate <=> 2-Dehydro-3-deoxy-D-gluconate + H2O
R01541	C00002 + C00204 <=> C00008 + C04442	ATP + 2-Dehydro-3-deoxy-D-gluconate <=> ADP + 2-Dehydro-3-deoxy-6-phospho-D-gluconate
R01542	C00204 + C00003 <=> C04349 + C00004 + C00080	2-Dehydro-3-deoxy-D-gluconate + NAD+ <=> (4S)-4,6-Dihydroxy-2,5-dioxohexanoate + NADH + H+
R01543	C00204 + C00006 <=> C04471 + C00005 + C00080	2-Dehydro-3-deoxy-D-gluconate + NADP+ <=> (4S,5S)-4,5-Dihydroxy-2,6-dioxohexanoate + NADPH + H+
R01544	C03752 <=> C00204 + C00014	2-Amino-2-deoxy-D-gluconate <=> 2-Dehydro-3-deoxy-D-gluconate + Ammonia
R01547	C00002 + C00360 <=> C00008 + C00206	ATP + dAMP <=> ADP + dADP
R01548	C00131 + C00475 <=> C00206 + C00055	dATP + Cytidine <=> dADP + CMP
R01549	C00131 + C00299 <=> C00206 + C00105	dATP + Uridine <=> dADP + UMP
R01550	C00207 + C00005 + C00080 <=> C01845 + C00006	Acetone + NADPH + H+ <=> Propan-2-ol + NADP+
R01553	C02659 <=> C01326 + C00207	Acetone cyanohydrin <=> Hydrogen cyanide + Acetone
R01555	C00208 + C00009 <=> C00031 + C00663	Maltose + Orthophosphate <=> D-Glucose + beta-D-Glucose 1-phosphate
R01556	C00024 + C00208 <=> C00010 + C02130	Acetyl-CoA + Maltose <=> CoA + Acetyl-maltose
R01557	C00208 <=> C01083	Maltose <=> alpha,alpha-Trehalose
R01558	C00002 + C00209 + C00010 <=> C00020 + C00013 + C00313	ATP + Oxalate + CoA <=> AMP + Diphosphate + Oxalyl-CoA
R01559	C00091 + C00209 <=> C00042 + C00313	Succinyl-CoA + Oxalate <=> Succinate + Oxalyl-CoA
R01560	C00212 + C00001 <=> C00294 + C00014	Adenosine + H2O <=> Inosine + Ammonia
R01561	C00212 + C00009 <=> C00147 + C00620	Adenosine + Orthophosphate <=> Adenine + alpha-D-Ribose 1-phosphate
R01562	C01367 + C00001 <=> C00212 + C00009	3'-AMP + H2O <=> Adenosine + Orthophosphate
R01563	C01043 + C00001 <=> C00213 + C00011 + C00014	N-Carbamoylsarcosine + H2O <=> Sarcosine + CO2 + Ammonia
R01564	C01026 + C00001 + C00007 <=> C00213 + C00067 + C00027	N,N-Dimethylglycine + H2O + Oxygen <=> Sarcosine + Formaldehyde + Hydrogen peroxide
R01566	C00300 + C00001 <=> C00213 + C00086	Creatine + H2O <=> Sarcosine + Urea
R01567	C00002 + C00214 <=> C00008 + C00364	ATP + Thymidine <=> ADP + dTMP
R01568	C00008 + C00214 <=> C00020 + C00364	ADP + Thymidine <=> AMP + dTMP
R01569	C00364 + C00001 <=> C00214 + C00009	dTMP + H2O <=> Thymidine + Orthophosphate
R01570	C00214 + C00009 <=> C00178 + C00672	Thymidine + Orthophosphate <=> Thymine + 2-Deoxy-D-ribose 1-phosphate
R01571	C00020 + C00214 <=> C00212 + C00364	AMP + Thymidine <=> Adenosine + dTMP
R01573	C00002 + C00216 <=> C00008 + C01112	ATP + D-Arabinose <=> ADP + D-Arabinose 5-phosphate
R01574	C00216 + C00003 <=> C00652 + C00004 + C00080	D-Arabinose + NAD+ <=> D-Arabinono-1,4-lactone + NADH + H+
R01575	C00216 + C00006 <=> C00652 + C00005 + C00080	D-Arabinose + NADP+ <=> D-Arabinono-1,4-lactone + NADPH + H+
R01576	C01187 <=> C00022 + C00216	3-Deoxy-D-manno-octulosonate <=> Pyruvate + D-Arabinose
R01577	C00216 <=> C00309	D-Arabinose <=> D-Ribulose
R01579	C00819 + C00001 <=> C00217 + C00014	D-Glutamine + H2O <=> D-Glutamate + Ammonia
R01580	C00647 + C00026 <=> C00018 + C00217	Pyridoxamine phosphate + 2-Oxoglutarate <=> Pyridoxal phosphate + D-Glutamate
R01582	C02265 + C00026 <=> C00166 + C00217	D-Phenylalanine + 2-Oxoglutarate <=> Phenylpyruvate + D-Glutamate
R01583	C00217 <=> C02237 + C00001	D-Glutamate <=> 5-Oxo-D-proline + H2O
R01584	C02721 + C00001 + C00006 <=> C00022 + C00218 + C00005 + C00080	N-Methyl-L-alanine + H2O + NADP+ <=> Pyruvate + Methylamine + NADPH + H+
R01585	C00002 + C00025 + C00218 <=> C00008 + C00009 + C03153	ATP + L-Glutamate + Methylamine <=> ADP + Orthophosphate + N5-Methyl-L-glutamine
R01586	C00218 + C00025 <=> C00014 + C01046	Methylamine + L-Glutamate <=> Ammonia + N-Methyl-L-glutamate
R01587	C03623 + C00001 <=> C00218 + C00026	N-Methyl-2-oxoglutaramate + H2O <=> Methylamine + 2-Oxoglutarate
R01589	C02294 + C00001 <=> C00218 + C00086	Methylguanidine + H2O <=> Methylamine + Urea
R01590	C00219 + 2 C00007 <=> C05956	Arachidonate + 2 Oxygen <=> Prostaglandin G2
R01593	C00219 + C00007 <=> C05966	Arachidonate + Oxygen <=> 15(S)-HPETE
R01594	C00219 + C00007 <=> C04822	Arachidonate + Oxygen <=> 8(R)-HPETE
R01595	C00219 + C00007 <=> C05356	Arachidonate + Oxygen <=> 5(S)-HPETE
R01596	C00219 + C00007 <=> C05965	Arachidonate + Oxygen <=> 12(S)-HPETE
R01598	C00002 + C00219 + C00010 <=> C00020 + C00013 + C02249	ATP + Arachidonate + CoA <=> AMP + Diphosphate + Arachidonyl-CoA
R01600	C00002 + C00221 <=> C00008 + C01172	ATP + beta-D-Glucose <=> ADP + beta-D-Glucose 6-phosphate
R01602	C00267 <=> C00221	alpha-D-Glucose <=> beta-D-Glucose
R01604	C00222 + C00003 + C00001 <=> C00383 + C00004 + C00080	3-Oxopropanoate + NAD+ + H2O <=> Malonate + NADH + H+
R01607	C00222 + C00006 + C00001 <=> C00383 + C00005 + C00080	3-Oxopropanoate + NADP+ + H2O <=> Malonate + NADPH + H+
R01608	C01013 + C00003 <=> C00222 + C00004 + C00080	3-Hydroxypropanoate + NAD+ <=> 3-Oxopropanoate + NADH + H+
R01609	C00222 + C00088 + C00027 <=> C03071 + C00007 + C00001	3-Oxopropanoate + Nitrite + Hydrogen peroxide <=> 3-aci-Nitropropanoate + Oxygen + H2O
R01611	C00222 <=> C00804 + C00001	3-Oxopropanoate <=> Propynoate + H2O
R01613	C00223 + 3 C00083 <=> C06561 + 4 C00010 + 3 C00011	p-Coumaroyl-CoA + 3 Malonyl-CoA <=> Naringenin chalcone + 4 CoA + 3 CO2
R01614	3 C00083 + C00223 <=> 4 C00010 + C03582 + 4 C00011	3 Malonyl-CoA + p-Coumaroyl-CoA <=> 4 CoA + Resveratrol + 4 CO2
R01615	C05608 + C00010 + C00006 <=> C00223 + C00005 + C00080	4-Hydroxycinnamyl aldehyde + CoA + NADP+ <=> p-Coumaroyl-CoA + NADPH + H+
R01616	C00002 + C00811 + C00010 <=> C00020 + C00013 + C00223	ATP + 4-Coumarate + CoA <=> AMP + Diphosphate + p-Coumaroyl-CoA
R01617	C00223 + C00179 <=> C04498 + C00010	p-Coumaroyl-CoA + Agmatine <=> p-Coumaroylagmatine + CoA
R01618	C00224 + C00002 <=> C00059 + C01260	Adenylyl sulfate + ATP <=> Sulfate + P1,P4-Bis(5'-adenosyl)tetraphosphate
R01619	C00224 + C00014 <=> C03851 + C00059	Adenylyl sulfate + Ammonia <=> Adenosine 5'-phosphoramidate + Sulfate
R01620	C00227 + C00047 <=> C00009 + C02727	Acetyl phosphate + L-Lysine <=> Orthophosphate + N6-Acetyl-L-lysine
R01621	C00231 + C00009 <=> C00227 + C00118 + C00001	D-Xylulose 5-phosphate + Orthophosphate <=> Acetyl phosphate + D-Glyceraldehyde 3-phosphate + H2O
R01627	C02637 <=> C00230 + C00001	3-Dehydroshikimate <=> 3,4-Dihydroxybenzoate + H2O
R01628	C00587 + C00007 + C00005 + C00080 <=> C00230 + C00006 + C00001	3-Hydroxybenzoate + Oxygen + NADPH + H+ <=> 3,4-Dihydroxybenzoate + NADP+ + H2O
R01629	C00230 + C00007 + C00004 + C00080 <=> C02814 + C00011 + C00003 + C00001	3,4-Dihydroxybenzoate + Oxygen + NADH + H+ <=> Benzene-1,2,4-triol + CO2 + NAD+ + H2O
R01630	C00230 + C00007 + C00005 + C00080 <=> C02814 + C00011 + C00006 + C00001	3,4-Dihydroxybenzoate + Oxygen + NADPH + H+ <=> Benzene-1,2,4-triol + CO2 + NADP+ + H2O
R01631	C00230 + C00007 <=> C01163	3,4-Dihydroxybenzoate + Oxygen <=> 3-Carboxy-cis,cis-muconate
R01632	C00230 + C00007 <=> C04484	3,4-Dihydroxybenzoate + Oxygen <=> 4-Carboxy-2-hydroxymuconate semialdehyde
R01633	C06318 + C00003 <=> C00230 + C00011 + C00004 + C00080	(3S,4R)-3,4-Dihydroxycyclohexa-1,5-diene-1,4-dicarboxylate + NAD+ <=> 3,4-Dihydroxybenzoate + CO2 + NADH + H+
R01634	C03223 <=> C00230 + C00011	3,4-Dihydroxyphthalate <=> 3,4-Dihydroxybenzoate + CO2
R01635	C03233 <=> C00230 + C00011	4,5-Dihydroxyphthalate <=> 3,4-Dihydroxybenzoate + CO2
R01636	C02236 + C00007 + C00004 + C00080 <=> C00230 + C00094 + C00003	4-Sulfobenzoate + Oxygen + NADH + H+ <=> 3,4-Dihydroxybenzoate + Sulfite + NAD+
R01639	C00002 + C00310 <=> C00008 + C00231	ATP + D-Xylulose <=> ADP + D-Xylulose 5-phosphate
R01641	C05382 + C00118 <=> C00117 + C00231	Sedoheptulose 7-phosphate + D-Glyceraldehyde 3-phosphate <=> D-Ribose 5-phosphate + D-Xylulose 5-phosphate
R01644	C00989 + C00003 <=> C00232 + C00004 + C00080	4-Hydroxybutanoic acid + NAD+ <=> Succinate semialdehyde + NADH + H+
R01645	C05601 <=> C00232 + C00022	4-Hydroxy-2-oxo-heptanedioate <=> Succinate semialdehyde + Pyruvate
R01647	C00232 + C00022 <=> C06201	Succinate semialdehyde + Pyruvate <=> 2,4-Dihydroxyhept-2-enedioate
R01648	C00334 + C00026 <=> C00232 + C00025	4-Aminobutanoate + 2-Oxoglutarate <=> Succinate semialdehyde + L-Glutamate
R01649	C01215 + 2 C00001 <=> C00033 + C00232 + C00014 + C00011	2-(Acetamidomethylene)succinate + 2 H2O <=> Acetate + Succinate semialdehyde + Ammonia + CO2
R01650	C00232 + C01326 + C00014 <=> C05715 + C00001	Succinate semialdehyde + Hydrogen cyanide + Ammonia <=> gamma-Amino-gamma-cyanobutanoate + H2O
R01651	C00233 + C00010 + C00003 <=> C02939 + C00011 + C00004 + C00080	4-Methyl-2-oxopentanoate + CoA + NAD+ <=> 3-Methylbutanoyl-CoA + CO2 + NADH + H+
R01652	C00233 + C00011 <=> C04236	4-Methyl-2-oxopentanoate + CO2 <=> (2S)-2-Isopropyl-3-oxosuccinate
R01654	C00002 + C00234 + C00025 <=> C00008 + C00009 + C05928	ATP + 10-Formyltetrahydrofolate + L-Glutamate <=> ADP + Orthophosphate + (6R)-10-Formyltetrahydropteroyldiglutamate
R01655	C00445 + C00001 <=> C00234 + C00080	5,10-Methenyltetrahydrofolate + H2O <=> 10-Formyltetrahydrofolate + H+
R01657	C00235 + C00078 <=> C00013 + C04290	Dimethylallyl diphosphate + L-Tryptophan <=> Diphosphate + 4-(3-Methylbut-2-enyl)-L-tryptophan
R01658	C00235 + C00129 <=> C00013 + C00341	Dimethylallyl diphosphate + Isopentenyl diphosphate <=> Diphosphate + Geranyl diphosphate
R01659	C00235 + C00129 <=> C00013 + C02569	Dimethylallyl diphosphate + Isopentenyl diphosphate <=> Diphosphate + Neryl diphosphate
R01660	C00236 + C00103 <=> C00197 + C01231	3-Phospho-D-glyceroyl phosphate + D-Glucose 1-phosphate <=> 3-Phospho-D-glycerate + alpha-D-Glucose 1,6-bisphosphate
R01662	C00236 <=> C01159	3-Phospho-D-glyceroyl phosphate <=> 2,3-Bisphospho-D-glycerate
R01663	C00239 + C00001 <=> C00365 + C00014	dCMP + H2O <=> dUMP + Ammonia
R01664	C00239 + C00001 <=> C00881 + C00009	dCMP + H2O <=> Deoxycytidine + Orthophosphate
R01665	C00002 + C00239 <=> C00008 + C00705	ATP + dCMP <=> ADP + dCDP
R01666	C00002 + C00881 <=> C00008 + C00239	ATP + Deoxycytidine <=> ADP + dCMP
R01667	C00705 + C00001 <=> C00239 + C00009	dCDP + H2O <=> dCMP + Orthophosphate
R01668	C00458 + C00001 <=> C00239 + C00013	dCTP + H2O <=> dCMP + Diphosphate
R01669	C00143 + C00001 + C00239 <=> C00101 + C03997	5,10-Methylenetetrahydrofolate + H2O + dCMP <=> Tetrahydrofolate + 5-Hydroxymethyldeoxycytidylate
R01670	C00143 + C00239 <=> C00415 + C03495	5,10-Methylenetetrahydrofolate + dCMP <=> Dihydrofolate + Deoxy-5-methylcytidylate
R01676	C00242 + C00001 <=> C00385 + C00014	Guanine + H2O <=> Xanthine + Ammonia
R01677	C00387 + C00001 <=> C00242 + C00121	Guanosine + H2O <=> Guanine + D-Ribose
R01678	C00243 + C00001 <=> C00267 + C00124	Lactose + H2O <=> alpha-D-Glucose + D-Galactose
R01681	C00519 + C00003 + C00001 <=> C00245 + C00004 + C00080	Hypotaurine + NAD+ + H2O <=> Taurine + NADH + H+
R01682	C00506 <=> C00245 + C00011	L-Cysteate <=> Taurine + CO2
R01683	C01616 + C00003 + C00001 <=> C00245 + C00022 + C00004 + C00080	Tauropine + NAD+ + H2O <=> Taurine + Pyruvate + NADH + H+
R01684	C00245 + C00026 <=> C00593 + C00025	Taurine + 2-Oxoglutarate <=> Sulfoacetaldehyde + L-Glutamate
R01686	C00245 + C00062 <=> C01959 + C00077	Taurine + L-Arginine <=> Taurocyamine + L-Ornithine
R01688	C00002 + C00246 <=> C00008 + C02527	ATP + Butanoic acid <=> ADP + Butanoylphosphate
R01689	C00246 + C00003 <=> C01771 + C00004 + C00080	Butanoic acid + NAD+ <=> 2-Butenoate + NADH + H+
R01690	C06435 + C00001 <=> C00130 + C00246	5'-Butyrylphosphoinosine + H2O <=> IMP + Butanoic acid
R01694	C00247 + C00006 <=> C00273 + C00005 + C00080	L-Sorbose + NADP+ <=> 5-Dehydro-D-fructose + NADPH + H+
R01695	C00247 + C00007 <=> C00273 + C00027	L-Sorbose + Oxygen <=> 5-Dehydro-D-fructose + Hydrogen peroxide
R01698	C00579 + C00003 <=> C00248 + C00004 + C00080	Dihydrolipoamide + NAD+ <=> Lipoamide + NADH + H+
R01703	C00249 + 2 C00027 <=> C01948 + C00011 + 3 C00001	Hexadecanoic acid + 2 Hydrogen peroxide <=> Pentadecanal + CO2 + 3 H2O
R01704	C00517 + C00003 + C00001 <=> C00249 + C00004 + C00080	Hexadecanal + NAD+ + H2O <=> Hexadecanoic acid + NADH + H+
R01707	C00250 + C00003 <=> C00971 + C00004 + C00080	Pyridoxal + NAD+ <=> 4-Pyridoxolactone + NADH + H+
R01708	C00314 + C00006 <=> C00250 + C00005 + C00080	Pyridoxine + NADP+ <=> Pyridoxal + NADPH + H+
R01709	C00250 + C00007 + C00001 <=> C00847 + C00027	Pyridoxal + Oxygen + H2O <=> 4-Pyridoxate + Hydrogen peroxide
R01710	C00534 + C00001 + C00007 <=> C00250 + C00014 + C00027	Pyridoxamine + H2O + Oxygen <=> Pyridoxal + Ammonia + Hydrogen peroxide
R01711	C00314 + C00007 <=> C00250 + C00027	Pyridoxine + Oxygen <=> Pyridoxal + Hydrogen peroxide
R01712	C00534 + C00022 <=> C00250 + C00041	Pyridoxamine + Pyruvate <=> Pyridoxal + L-Alanine
R01713	C00534 + C00036 <=> C00250 + C00049	Pyridoxamine + Oxaloacetate <=> Pyridoxal + L-Aspartate
R01714	C01269 <=> C00251 + C00009	5-O-(1-Carboxyvinyl)-3-phosphoshikimate <=> Chorismate + Orthophosphate
R01715	C00251 <=> C00254	Chorismate <=> Prephenate
R01716	C00251 + C00064 <=> C11355 + C00025	Chorismate + L-Glutamine <=> 4-Amino-4-deoxychorismate + L-Glutamate
R01717	C00251 <=> C00885	Chorismate <=> Isochorismate
R01718	C00252 + C00001 <=> C00267 + C00031	Isomaltose + H2O <=> alpha-D-Glucose + D-Glucose
R01720	C00253 + C00006 + C00001 <=> C01020 + C00005 + C00080	Nicotinate + NADP+ + H2O <=> 6-Hydroxynicotinate + NADPH + H+
R01721	C00019 + C00253 <=> C00021 + C01004	S-Adenosyl-L-methionine + Nicotinate <=> S-Adenosyl-L-homocysteine + N-Methylnicotinate
R01722	C00029 + C00253 <=> C00015 + C03003	UDP-glucose + Nicotinate <=> UDP + N-Glucosylnicotinate
R01723	C00253 + C00037 + C00002 <=> C05380 + C00020 + C00013	Nicotinate + Glycine + ATP <=> Nicotinurate + AMP + Diphosphate
R01724	C01185 + C00013 + C00008 + C00009 <=> C00253 + C00119 + C00002 + C00001 + C00080	Nicotinate D-ribonucleotide + Diphosphate + ADP + Orthophosphate <=> Nicotinate + 5-Phospho-alpha-D-ribose 1-diphosphate + ATP + H2O + H+
R01728	C00254 + C00003 <=> C01179 + C00011 + C00004 + C00080	Prephenate + NAD+ <=> 3-(4-Hydroxyphenyl)pyruvate + CO2 + NADH + H+
R01730	C00254 + C00006 <=> C01179 + C00011 + C00005 + C00080	Prephenate + NADP+ <=> 3-(4-Hydroxyphenyl)pyruvate + CO2 + NADPH + H+
R01731	C00036 + C00826 <=> C00049 + C00254	Oxaloacetate + L-Arogenate <=> L-Aspartate + Prephenate
R01732	C00255 + C00001 <=> C00474 + C01727	Riboflavin + H2O <=> Ribitol + Lumichrome
R01735	C00937 + C00003 + C00001 <=> C00256 + C00004 + C00080	(R)-Lactaldehyde + NAD+ + H2O <=> (R)-Lactate + NADH + H+
R01736	C03451 + C00001 <=> C00051 + C00256	(R)-S-Lactoylglutathione + H2O <=> Glutathione + (R)-Lactate
R01737	C00002 + C00257 <=> C00008 + C00345	ATP + D-Gluconic acid <=> ADP + 6-Phospho-D-gluconate
R01738	C00257 + C00003 <=> C01062 + C00004 + C00080	D-Gluconic acid + NAD+ <=> 5-Dehydro-D-gluconate + NADH + H+
R01739	C00257 + C00006 <=> C06473 + C00005 + C00080	D-Gluconic acid + NADP+ <=> 2-Keto-D-gluconic acid + NADPH + H+
R01740	C00257 + C00006 <=> C01062 + C00005 + C00080	D-Gluconic acid + NADP+ <=> 5-Dehydro-D-gluconate + NADPH + H+
R01741	C00257 + C00016 <=> C06473 + C01352	D-Gluconic acid + FAD <=> 2-Keto-D-gluconic acid + FADH2
R01745	C00258 + C00003 <=> C01146 + C00004 + C00080	D-Glycerate + NAD+ <=> 2-Hydroxy-3-oxopropanoate + NADH + H+
R01747	C00258 + C00006 <=> C01146 + C00005 + C00080	D-Glycerate + NADP+ <=> 2-Hydroxy-3-oxopropanoate + NADPH + H+
R01748	C00631 + C00001 <=> C00258 + C00009	2-Phospho-D-glycerate + H2O <=> D-Glycerate + Orthophosphate
R01749	C00258 + C00003 + C00011 <=> C03459 + C00004 + C00080	D-Glycerate + NAD+ + CO2 <=> 2-Hydroxy-3-oxosuccinate + NADH + H+
R01750	C00258 + C00006 + C00011 <=> C03459 + C00005 + C00080	D-Glycerate + NADP+ + CO2 <=> 2-Hydroxy-3-oxosuccinate + NADPH + H+
R01751	C00898 <=> C00258 + C00011	(R,R)-Tartaric acid <=> D-Glycerate + CO2
R01752	C00577 + C00003 + C00001 <=> C00258 + C00004 + C00080	D-Glyceraldehyde + NAD+ + H2O <=> D-Glycerate + NADH + H+
R01754	C00002 + C00259 <=> C00008 + C03906	ATP + L-Arabinose <=> ADP + beta-L-Arabinose 1-phosphate
R01757	C00259 + C00003 <=> C01114 + C00004 + C00080	L-Arabinose + NAD+ <=> L-Arabinono-1,4-lactone + NADH + H+
R01758	C00532 + C00003 <=> C00259 + C00004 + C00080	L-Arabitol + NAD+ <=> L-Arabinose + NADH + H+
R01759	C00532 + C00006 <=> C00259 + C00005 + C00080	L-Arabitol + NADP+ <=> L-Arabinose + NADPH + H+
R01761	C00259 <=> C00508	L-Arabinose <=> L-Ribulose
R01763	C00556 + C00003 <=> C00261 + C00004 + C00080	Benzyl alcohol + NAD+ <=> Benzaldehyde + NADH + H+
R01764	C02137 <=> C00261 + C00011	alpha-Oxo-benzeneacetic acid <=> Benzaldehyde + CO2
R01766	C03290 <=> C00037 + C00261	L-threo-3-Phenylserine <=> Glycine + Benzaldehyde
R01767	C00561 <=> C01326 + C00261	Mandelonitrile <=> Hydrogen cyanide + Benzaldehyde
R01768	C00262 + C00003 + C00001 <=> C00385 + C00004 + C00080	Hypoxanthine + NAD+ + H2O <=> Xanthine + NADH + H+
R01769	C00262 + C00007 + C00001 <=> C00385 + C00027	Hypoxanthine + Oxygen + H2O <=> Xanthine + Hydrogen peroxide
R01770	C00294 + C00001 <=> C00262 + C00121	Inosine + H2O <=> Hypoxanthine + D-Ribose
R01771	C00002 + C00263 <=> C00008 + C01102	ATP + L-Homoserine <=> ADP + O-Phospho-L-homoserine
R01773	C00263 + C00003 <=> C00441 + C00004 + C00080	L-Homoserine + NAD+ <=> L-Aspartate 4-semialdehyde + NADH + H+
R01775	C00263 + C00006 <=> C00441 + C00005 + C00080	L-Homoserine + NADP+ <=> L-Aspartate 4-semialdehyde + NADPH + H+
R01776	C00024 + C00263 <=> C00010 + C01077	Acetyl-CoA + L-Homoserine <=> CoA + O-Acetyl-L-homoserine
R01777	C00091 + C00263 <=> C00010 + C01118	Succinyl-CoA + L-Homoserine <=> CoA + O-Succinyl-L-homoserine
R01781	C01380 + C00003 <=> C00266 + C00004 + C00080	Ethylene glycol + NAD+ <=> Glycolaldehyde + NADH + H+
R01782	C03826 <=> C00022 + C00266	2-Dehydro-3-deoxy-D-xylonate <=> Pyruvate + Glycolaldehyde
R01784	C00684 <=> C00022 + C00266	2-Dehydro-3-deoxy-L-arabinonate <=> Pyruvate + Glycolaldehyde
R01785	C06441 <=> C00111 + C00266	L-Xylulose 1-phosphate <=> Glycerone phosphate + Glycolaldehyde
R01786	C00002 + C00267 <=> C00008 + C00668	ATP + alpha-D-Glucose <=> ADP + alpha-D-Glucose 6-phosphate
R01787	C00794 + C00006 <=> C00267 + C00005 + C00080	D-Sorbitol + NADP+ <=> alpha-D-Glucose + NADPH + H+
R01788	C00668 + C00001 <=> C00267 + C00009	alpha-D-Glucose 6-phosphate + H2O <=> alpha-D-Glucose + Orthophosphate
R01793	C00268 + C00004 + C00080 <=> C00272 + C00003	Dihydrobiopterin + NADH + H+ <=> Tetrahydrobiopterin + NAD+
R01794	C00268 + C00005 + C00080 <=> C00272 + C00006	Dihydrobiopterin + NADPH + H+ <=> Tetrahydrobiopterin + NADP+
R01795	C00272 + C00079 + C00007 <=> C00268 + C00082 + C00001	Tetrahydrobiopterin + L-Phenylalanine + Oxygen <=> Dihydrobiopterin + L-Tyrosine + H2O
R01804	C00270 + C00009 <=> C00645 + C00074 + C00001	N-Acetylneuraminate + Orthophosphate <=> N-Acetyl-D-mannosamine + Phosphoenolpyruvate + H2O
R01805	C06241 + C00001 <=> C00270 + C00009	N-Acetylneuraminate 9-phosphate + H2O <=> N-Acetylneuraminate + Orthophosphate
R01806	C00024 + C00270 <=> C00010 + C04015	Acetyl-CoA + N-Acetylneuraminate <=> CoA + N-Acetyl-4-O-acetylneuraminate
R01807	C00024 + C00270 <=> C00010 + C04016	Acetyl-CoA + N-Acetylneuraminate <=> CoA + N-Acetyl-7-O-acetylneuraminate
R01808	C00024 + C00270 <=> C00010 + C04017	Acetyl-CoA + N-Acetylneuraminate <=> CoA + N-Acetyl-9-O-acetylneuraminate
R01811	C00270 <=> C00645 + C00022	N-Acetylneuraminate <=> N-Acetyl-D-mannosamine + Pyruvate
R01812	C00272 + 2 C00006 <=> C06313 + 2 C00005 + 2 C00080	Tetrahydrobiopterin + 2 NADP+ <=> Biopterin + 2 NADPH + 2 H+
R01813	C00272 + C00006 <=> C04244 + C00005 + C00080	Tetrahydrobiopterin + NADP+ <=> 6-Lactoyl-5,6,7,8-tetrahydropterin + NADPH + H+
R01814	C00272 + C00078 + C00007 <=> C00643 + C00268 + C00001	Tetrahydrobiopterin + L-Tryptophan + Oxygen <=> 5-Hydroxy-L-tryptophan + Dihydrobiopterin + H2O
R01815	C00272 + C00082 + C00007 <=> C00355 + C00268 + C00001	Tetrahydrobiopterin + L-Tyrosine + Oxygen <=> 3,4-Dihydroxy-L-phenylalanine + Dihydrobiopterin + H2O
R01816	C00272 + C00108 + C00007 <=> C00632 + C00268 + C00001	Tetrahydrobiopterin + Anthranilate + Oxygen <=> 3-Hydroxyanthranilate + Dihydrobiopterin + H2O
R01817	C00644 + C00006 <=> C00275 + C00005 + C00080	D-Mannitol 1-phosphate + NADP+ <=> D-Mannose 6-phosphate + NADPH + H+
R01818	C00275 <=> C00636	D-Mannose 6-phosphate <=> D-Mannose 1-phosphate
R01819	C00275 <=> C05345	D-Mannose 6-phosphate <=> beta-D-Fructose 6-phosphate
R01825	C00279 + C00003 + C00001 <=> C03393 + C00004 + C00080	D-Erythrose 4-phosphate + NAD+ + H2O <=> 4-Phospho-D-erythronate + NADH + H+
R01826	C00074 + C00279 + C00001 <=> C04691 + C00009	Phosphoenolpyruvate + D-Erythrose 4-phosphate + H2O <=> 2-Dehydro-3-deoxy-D-arabino-heptonate 7-phosphate + Orthophosphate
R01827	C05382 + C00118 <=> C00279 + C05345	Sedoheptulose 7-phosphate + D-Glyceraldehyde 3-phosphate <=> D-Erythrose 4-phosphate + beta-D-Fructose 6-phosphate
R01829	C00447 <=> C00111 + C00279	Sedoheptulose 1,7-bisphosphate <=> Glycerone phosphate + D-Erythrose 4-phosphate
R01830	C05345 + C00118 <=> C00279 + C00231	beta-D-Fructose 6-phosphate + D-Glyceraldehyde 3-phosphate <=> D-Erythrose 4-phosphate + D-Xylulose 5-phosphate
R01835	C03772 + C00006 <=> C00080 + C00005 + C00280	5beta-Androstane-3,17-dione + NADP+ <=> H+ + NADPH + Androstenedione
R01836	C00535 + C00003 <=> C00280 + C00004 + C00080	Testosterone + NAD+ <=> Androstenedione + NADH + H+
R01837	C01227 + C00003 <=> C00280 + C00004 + C00080	Dehydroepiandrosterone + NAD+ <=> Androstenedione + NADH + H+
R01838	C00535 + C00006 <=> C00280 + C00005 + C00080	Testosterone + NADP+ <=> Androstenedione + NADPH + H+
R01843	C00002 + C05382 <=> C00008 + C00447	ATP + Sedoheptulose 7-phosphate <=> ADP + Sedoheptulose 1,7-bisphosphate
R01844	C00002 + C02076 <=> C00008 + C05382	ATP + Sedoheptulose <=> ADP + Sedoheptulose 7-phosphate
R01845	C00447 + C00001 <=> C05382 + C00009	Sedoheptulose 1,7-bisphosphate + H2O <=> Sedoheptulose 7-phosphate + Orthophosphate
R01850	C00024 + C00283 <=> C00010 + C01857	Acetyl-CoA + Hydrogen sulfide <=> CoA + Thioacetate
R01851	C00409 + C00007 + C00001 <=> C00283 + C00067 + C00027	Methanethiol + Oxygen + H2O <=> Hydrogen sulfide + Formaldehyde + Hydrogen peroxide
R01855	C00286 + C00001 <=> C00362 + C00013	dGTP + H2O <=> dGMP + Diphosphate
R01856	C00286 + C00001 <=> C00330 + C00536	dGTP + H2O <=> Deoxyguanosine + Triphosphate
R01857	C00002 + C00361 <=> C00008 + C00286	ATP + dGDP <=> ADP + dGTP
R01858	C00286 + C00022 <=> C00361 + C00074	dGTP + Pyruvate <=> dGDP + Phosphoenolpyruvate
R01859	C00002 + C00100 + C00288 <=> C00008 + C00009 + C00683	ATP + Propanoyl-CoA + HCO3- <=> ADP + Orthophosphate + (S)-Methylmalonyl-CoA
R01860	C00568 <=> C00292 + C00011	4-Aminobenzoate <=> Aniline + CO2
R01861	C00053 + C00292 <=> C00054 + C06011	3'-Phosphoadenylyl sulfate + Aniline <=> Adenosine 3',5'-bisphosphate + Benzenamine sulfate
R01863	C00294 + C00009 <=> C00262 + C00620	Inosine + Orthophosphate <=> Hypoxanthine + alpha-D-Ribose 1-phosphate
R01866	C00337 + C00006 <=> C00295 + C00005 + C00080	(S)-Dihydroorotate + NADP+ <=> Orotate + NADPH + H+
R01867	C00337 + C00122 <=> C00295 + C00042	(S)-Dihydroorotate + Fumarate <=> Orotate + Succinate
R01869	C00337 + C00003 <=> C00295 + C00080 + C00004	(S)-Dihydroorotate + NAD+ <=> Orotate + H+ + NADH
R01870	C01103 + C00013 <=> C00295 + C00119	Orotidine 5'-phosphate + Diphosphate <=> Orotate + 5-Phospho-alpha-D-ribose 1-diphosphate
R01872	C00296 + C00003 <=> C00944 + C00004 + C00080	Quinate + NAD+ <=> 3-Dehydroquinate + NADH + H+
R01873	C00296 + C00113 <=> C01359 + C00944	Quinate + PQQ <=> PQQH2 + 3-Dehydroquinate
R01874	C00793 + C00001 <=> C00283 + C00014 + C00022	D-Cysteine + H2O <=> Hydrogen sulfide + Ammonia + Pyruvate
R01875	C00320 + 2 C00051 + C00080 <=> C00094 + C00127 + C00283	Thiosulfate + 2 Glutathione + H+ <=> Sulfite + Glutathione disulfide + Hydrogen sulfide
R01876	C00299 + C00009 <=> C00106 + C00620	Uridine + Orthophosphate <=> Uracil + alpha-D-Ribose 1-phosphate
R01877	C01368 + C00001 <=> C00299 + C00009	3'-UMP + H2O <=> Uridine + Orthophosphate
R01878	C00475 + C00001 <=> C00299 + C00014	Cytidine + H2O <=> Uridine + Ammonia
R01879	C00526 + C00026 + C00007 <=> C00299 + C00042 + C00011	Deoxyuridine + 2-Oxoglutarate + Oxygen <=> Uridine + Succinate + CO2
R01880	C00286 + C00299 <=> C00361 + C00105	dGTP + Uridine <=> dGDP + UMP
R01881	C00002 + C00300 <=> C00008 + C02305	ATP + Creatine <=> ADP + Phosphocreatine
R01882	C02305 + C00001 <=> C00300 + C00009	Phosphocreatine + H2O <=> Creatine + Orthophosphate
R01883	C00019 + C00581 <=> C00021 + C00300	S-Adenosyl-L-methionine + Guanidinoacetate <=> S-Adenosyl-L-homocysteine + Creatine
R01884	C00791 + C00001 <=> C00300	Creatinine + H2O <=> Creatine
R01885	C00301 + C00001 <=> C00620 + C00020	ADP-ribose + H2O <=> alpha-D-Ribose 1-phosphate + AMP
R01886	C01201 + C00001 <=> C00062 + C00301	N(omega)-(ADP-D-ribosyl)-L-arginine + H2O <=> L-Arginine + ADP-ribose
R01887	C05715 + 2 C00001 <=> C00302 + C00014	gamma-Amino-gamma-cyanobutanoate + 2 H2O <=> Glutamate + Ammonia
R01888	C00002 + C01822 <=> C00008 + C03281	ATP + Kanamycin A <=> ADP + Kanamycin A 3'-phosphate
R01889	C00024 + C00825 <=> C00010 + C03154	Acetyl-CoA + Kanamycin B <=> CoA + N6'-Acetylkanamycin-B
R01890	C00063 + C00588 <=> C00013 + C00307	CTP + Choline phosphate <=> Diphosphate + CDP-choline
R01895	C00474 + C00003 <=> C00309 + C00004 + C00080	Ribitol + NAD+ <=> D-Ribulose + NADH + H+
R01896	C00379 + C00003 <=> C00310 + C00004 + C00080	Xylitol + NAD+ <=> D-Xylulose + NADH + H+
R01898	C00310 <=> C00476	D-Xylulose <=> D-Lyxose
R01899	C00311 + C00006 <=> C05379 + C00005 + C00080	Isocitrate + NADP+ <=> Oxalosuccinate + NADPH + H+
R01900	C00311 <=> C00417 + C00001	Isocitrate <=> cis-Aconitate + H2O
R01901	C00002 + C00312 <=> C00008 + C03291	ATP + L-Xylulose <=> ADP + L-Xylulose 5-phosphate
R01902	C00002 + C00312 <=> C00008 + C06441	ATP + L-Xylulose <=> ADP + L-Xylulose 1-phosphate
R01903	C00532 + C00003 <=> C00312 + C00004 + C00080	L-Arabitol + NAD+ <=> L-Xylulose + NADH + H+
R01904	C00379 + C00006 <=> C00312 + C00005 + C00080	Xylitol + NADP+ <=> L-Xylulose + NADPH + H+
R01905	C00618 <=> C00312 + C00011	3-Dehydro-L-gulonate <=> L-Xylulose + CO2
R01906	C00312 <=> C01508	L-Xylulose <=> L-Lyxose
R01908	C00313 <=> C00798 + C00011	Oxalyl-CoA <=> Formyl-CoA + CO2
R01909	C00002 + C00314 <=> C00008 + C00627	ATP + Pyridoxine <=> ADP + Pyridoxine phosphate
R01910	C00314 + C00007 <=> C06051 + C00027	Pyridoxine + Oxygen <=> Isopyridoxal + Hydrogen peroxide
R01911	C00314 + C00009 <=> C00627 + C00001	Pyridoxine + Orthophosphate <=> Pyridoxine phosphate + H2O
R01912	C00029 + C00314 <=> C00015 + C03996	UDP-glucose + Pyridoxine <=> UDP + 5'-O-beta-D-Glucosylpyridoxine
R01914	C00315 + C00007 + C00001 <=> C00986 + C00555 + C00027	Spermidine + Oxygen + H2O <=> 1,3-Diaminopropane + 4-Aminobutyraldehyde + Hydrogen peroxide
R01917	C00002 + C00051 + C00315 <=> C00008 + C00009 + C05730	ATP + Glutathione + Spermidine <=> ADP + Orthophosphate + Glutathionylspermidine
R01918	C05730 + C00001 <=> C00051 + C00315	Glutathionylspermidine + H2O <=> Glutathione + Spermidine
R01919	C00134 + C00315 <=> C06366 + C00986	Putrescine + Spermidine <=> sym-Homospermidine + 1,3-Diaminopropane
R01920	C01137 + C00134 <=> C00170 + C00315	S-Adenosylmethioninamine + Putrescine <=> 5'-Methylthioadenosine + Spermidine
R01921	C15025 + C00003 <=> C02636 + C00004 + C00080	(S)-Carnitine + NAD+ <=> 3-Dehydrocarnitine + NADH + H+
R01922	C02290 + C00001 <=> C00318 + C00014 + C00080	L-Carnitinamide + H2O <=> L-Carnitine + Ammonia + H+
R01923	C00154 + C00318 <=> C00010 + C02990	Palmitoyl-CoA + L-Carnitine <=> CoA + L-Palmitoylcarnitine
R01926	C00319 + C00002 <=> C06124 + C00008	Sphingosine + ATP <=> Sphingosine 1-phosphate + ADP
R01928	C00052 + C00319 <=> C00015 + C01747	UDP-alpha-D-galactose + Sphingosine <=> UDP + Psychosine
R01929	C00307 + C00319 <=> C00055 + C03640	CDP-choline + Sphingosine <=> CMP + Sphingosyl-phosphocholine
R01930	C01861 + C00001 <=> C00320 + C00059	Trithionate + H2O <=> Thiosulfate + Sulfate
R01931	C00320 + C00177 <=> C00094 + C01755	Thiosulfate + Cyanide ion <=> Sulfite + Thiocyanate
R01932	C00322 + C00004 + C00080 <=> C02360 + C00003	2-Oxoadipate + NADH + H+ <=> 2-Hydroxyadipate + NAD+
R01933	C00322 + C00010 + C00003 <=> C00527 + C00011 + C00004 + C00080	2-Oxoadipate + CoA + NAD+ <=> Glutaryl-CoA + CO2 + NADH + H+
R01934	C05662 + C00003 <=> C00322 + C00011 + C00004 + C00080	Homoisocitrate + NAD+ <=> 2-Oxoadipate + CO2 + NADH + H+
R01936	C05533 <=> C00322 + C00011	Oxaloglutarate <=> 2-Oxoadipate + CO2
R01937	C00322 + C00014 + C00003 <=> C02220 + C00004 + C00080 + C00001	2-Oxoadipate + Ammonia + NAD+ <=> 2-Aminomuconate + NADH + H+ + H2O
R01938	C00322 + C00014 + C00006 <=> C02220 + C00005 + C00080 + C00001	2-Oxoadipate + Ammonia + NADP+ <=> 2-Aminomuconate + NADPH + H+ + H2O
R01939	C00956 + C00026 <=> C00322 + C00025	L-2-Aminoadipate + 2-Oxoglutarate <=> 2-Oxoadipate + L-Glutamate
R01941	C10945 + C00010 + C00006 <=> C00323 + C00005 + C00080	Caffeic aldehyde + CoA + NADP+ <=> Caffeoyl-CoA + NADPH + H+
R01942	C00019 + C00323 <=> C00021 + C00406	S-Adenosyl-L-methionine + Caffeoyl-CoA <=> S-Adenosyl-L-homocysteine + Feruloyl-CoA
R01943	C00002 + C01197 + C00010 <=> C00020 + C00013 + C00323	ATP + Caffeate + CoA <=> AMP + Diphosphate + Caffeoyl-CoA
R01944	C00323 + C00134 <=> C00010 + C03002	Caffeoyl-CoA + Putrescine <=> CoA + N-Caffeoylputrescine
R01945	C00323 + C00296 <=> C00010 + C00852	Caffeoyl-CoA + Quinate <=> CoA + Chlorogenate
R01946	C00323 + C00311 <=> C00010 + C02927	Caffeoyl-CoA + Isocitrate <=> CoA + 2-Caffeoylisocitrate
R01951	C00044 + C02985 <=> C00013 + C00325	GTP + L-Fucose 1-phosphate <=> Diphosphate + GDP-L-fucose
R01954	C00002 + C00327 + C00049 <=> C00020 + C00013 + C03406	ATP + L-Citrulline + L-Aspartate <=> AMP + Diphosphate + N-(L-Arginino)succinate
R01956	C00328 + C00026 <=> C01252 + C00025	L-Kynurenine + 2-Oxoglutarate <=> 4-(2-Aminophenyl)-2,4-dioxobutanoate + L-Glutamate
R01957	C00328 + C00048 <=> C01252 + C00037	L-Kynurenine + Glyoxylate <=> 4-(2-Aminophenyl)-2,4-dioxobutanoate + Glycine
R01959	C02700 + C00001 <=> C00058 + C00328	L-Formylkynurenine + H2O <=> Formate + L-Kynurenine
R01960	C00328 + C00007 + C00005 + C00080 <=> C03227 + C00006 + C00001	L-Kynurenine + Oxygen + NADPH + H+ <=> 3-Hydroxy-L-kynurenine + NADP+ + H2O
R01961	C00002 + C00329 <=> C00008 + C00352	ATP + D-Glucosamine <=> ADP + D-Glucosamine 6-phosphate
R01962	C00329 + C00007 + C00001 <=> C03752 + C00027	D-Glucosamine + Oxygen + H2O <=> 2-Amino-2-deoxy-D-gluconate + Hydrogen peroxide
R01963	C01075 + C00001 <=> C00329 + C00059	N-Sulfo-D-glucosamine + H2O <=> D-Glucosamine + Sulfate
R01964	C00081 + C00329 <=> C00104 + C00352	ITP + D-Glucosamine <=> IDP + D-Glucosamine 6-phosphate
R01965	C00131 + C00329 <=> C00206 + C00352	dATP + D-Glucosamine <=> dADP + D-Glucosamine 6-phosphate
R01967	C00002 + C00330 <=> C00008 + C00362	ATP + Deoxyguanosine <=> ADP + dGMP
R01968	C00362 + C00001 <=> C00330 + C00009	dGMP + H2O <=> Deoxyguanosine + Orthophosphate
R01969	C00330 + C00009 <=> C00242 + C00672	Deoxyguanosine + Orthophosphate <=> Guanine + 2-Deoxy-D-ribose 1-phosphate
R01971	C02043 + C00003 <=> C00331 + C00004 + C00080	Indolelactate + NAD+ <=> Indolepyruvate + NADH + H+
R01972	C00019 + C00331 <=> C00021 + C21289	S-Adenosyl-L-methionine + Indolepyruvate <=> S-Adenosyl-L-homocysteine + (R)-3-(Indol-3-yl)-2-oxobutyrate
R01973	C00019 + C00331 <=> C00021 + C05644	S-Adenosyl-L-methionine + Indolepyruvate <=> S-Adenosyl-L-homocysteine + 3-Methylindolepyruvate
R01974	C00331 <=> C00637 + C00011	Indolepyruvate <=> Indole-3-acetaldehyde + CO2
R01975	C01144 + C00003 <=> C00332 + C00004 + C00080	(S)-3-Hydroxybutanoyl-CoA + NAD+ <=> Acetoacetyl-CoA + NADH + H+
R01976	C01144 + C00006 <=> C00332 + C00005 + C00080	(S)-3-Hydroxybutanoyl-CoA + NADP+ <=> Acetoacetyl-CoA + NADPH + H+
R01977	C03561 + C00006 <=> C00332 + C00005 + C00080	(R)-3-Hydroxybutanoyl-CoA + NADP+ <=> Acetoacetyl-CoA + NADPH + H+
R01978	C00356 + C00010 <=> C00024 + C00001 + C00332	(S)-3-Hydroxy-3-methylglutaryl-CoA + CoA <=> Acetyl-CoA + H2O + Acetoacetyl-CoA
R01980	C00002 + C00333 <=> C00008 + C04037	ATP + D-Galacturonate <=> ADP + 1-Phospho-alpha-D-galacturonate
R01981	C00333 + C00003 + C00001 <=> C00879 + C00004 + C00080	D-Galacturonate + NAD+ + H2O <=> D-Galactarate + NADH + H+
R01983	C00333 <=> C00558	D-Galacturonate <=> D-Tagaturonate
R01984	C00333 <=> C06430 + C00001	D-Galacturonate <=> D-Galacturonolactone + H2O
R01986	C00555 + C00006 + C00001 <=> C00334 + C00005 + C00080	4-Aminobutyraldehyde + NADP+ + H2O <=> 4-Aminobutanoate + NADPH + H+
R01987	C00334 + C00033 <=> C02946 + C00001	4-Aminobutanoate + Acetate <=> 4-Acetamidobutanoate + H2O
R01989	C00062 + C00334 <=> C00077 + C01035	L-Arginine + 4-Aminobutanoate <=> L-Ornithine + 4-Guanidinobutanoate
R01990	C01035 + C00001 <=> C00334 + C00086	4-Guanidinobutanoate + H2O <=> 4-Aminobutanoate + Urea
R01991	C00002 + C00135 + C00334 <=> C00008 + C00009 + C00884	ATP + L-Histidine + 4-Aminobutanoate <=> ADP + Orthophosphate + Homocarnosine
R01992	C00884 + C00001 <=> C00334 + C00135	Homocarnosine + H2O <=> 4-Aminobutanoate + L-Histidine
R01993	C00337 + C00001 <=> C00438	(S)-Dihydroorotate + H2O <=> N-Carbamoyl-L-aspartate
R02003	C00341 + C00129 <=> C00013 + C00448	Geranyl diphosphate + Isopentenyl diphosphate <=> Diphosphate + trans,trans-Farnesyl diphosphate
R02004	C00341 + C00001 <=> C02344 + C00013	Geranyl diphosphate + H2O <=> (-)-endo-Fenchol + Diphosphate
R02006	C00341 + C00001 <=> C02462 + C00013	Geranyl diphosphate + H2O <=> Sabinene hydrate + Diphosphate
R02007	C03190 <=> C00341	(+)-Bornyl diphosphate <=> Geranyl diphosphate
R02008	C17622 <=> C06069	(6E)-8-Oxogeranial <=> Iridodial
R02009	C00341 <=> C06074 + C00013	Geranyl diphosphate <=> Myrcene + Diphosphate
R02010	C00341 <=> C06075 + C00013	Geranyl diphosphate <=> Terpinolene + Diphosphate
R02011	C00341 <=> C06076 + C00013	Geranyl diphosphate <=> Camphene + Diphosphate
R02013	C00341 <=> C00521 + C00013	Geranyl diphosphate <=> (-)-Limonene + Diphosphate
R02032	C00345 + C00003 <=> C01218 + C00004 + C00080	6-Phospho-D-gluconate + NAD+ <=> 6-Phospho-2-dehydro-D-gluconate + NADH + H+
R02034	C00345 + C00006 <=> C01218 + C00005 + C00080	6-Phospho-D-gluconate + NADP+ <=> 6-Phospho-2-dehydro-D-gluconate + NADPH + H+
R02035	C01236 + C00001 <=> C00345	D-Glucono-1,5-lactone 6-phosphate + H2O <=> 6-Phospho-D-gluconate
R02036	C00345 <=> C04442 + C00001	6-Phospho-D-gluconate <=> 2-Dehydro-3-deoxy-6-phospho-D-gluconate + H2O
R02037	C00019 + C00346 <=> C00021 + C01210	S-Adenosyl-L-methionine + Ethanolamine phosphate <=> S-Adenosyl-L-homocysteine + N-Methylethanolamine phosphate
R02038	C00063 + C00346 <=> C00013 + C00570	CTP + Ethanolamine phosphate <=> Diphosphate + CDP-ethanolamine
R02047	C01188 + C00003 <=> C00349 + C00004 + C00080	3-Hydroxy-2-methylpropanoate + NAD+ <=> 2-Methyl-3-oxopropanoate + NADH + H+
R02050	C01205 + C00022 <=> C00349 + C00041	(R)-3-Amino-2-methylpropanoate + Pyruvate <=> 2-Methyl-3-oxopropanoate + L-Alanine
R02058	C00024 + C00352 <=> C00010 + C00357	Acetyl-CoA + D-Glucosamine 6-phosphate <=> CoA + N-Acetyl-D-glucosamine 6-phosphate
R02059	C00357 + C00001 <=> C00352 + C00033	N-Acetyl-D-glucosamine 6-phosphate + H2O <=> D-Glucosamine 6-phosphate + Acetate
R02060	C06156 <=> C00352	alpha-D-Glucosamine 1-phosphate <=> D-Glucosamine 6-phosphate
R02061	C00448 + C00129 <=> C00013 + C00353	trans,trans-Farnesyl diphosphate + Isopentenyl diphosphate <=> Diphosphate + Geranylgeranyl diphosphate
R02063	C00353 + 3 C00080 + 3 C00005 <=> C05427 + 3 C00006	Geranylgeranyl diphosphate + 3 H+ + 3 NADPH <=> Phytyl diphosphate + 3 NADP+
R02064	C00353 <=> C01414 + C00013	Geranylgeranyl diphosphate <=> Casbene + Diphosphate
R02065	2 C00353 <=> C00013 + C03427	2 Geranylgeranyl diphosphate <=> Diphosphate + Prephytoene diphosphate
R02068	C00353 <=> C06089	Geranylgeranyl diphosphate <=> ent-Copalyl diphosphate
R02071	C00002 + C01094 <=> C00008 + C05378	ATP + D-Fructose 1-phosphate <=> ADP + beta-D-Fructose 1,6-bisphosphate
R02073	C00013 + C05345 <=> C00009 + C05378	Diphosphate + beta-D-Fructose 6-phosphate <=> Orthophosphate + beta-D-Fructose 1,6-bisphosphate
R02075	C00355 + C00007 <=> C04796	3,4-Dihydroxy-L-phenylalanine + Oxygen <=> 4-(L-Alanin-3-yl)-2-hydroxy-cis,cis-muconate 6-semialdehyde
R02076	C00355 + C00007 <=> C04797	3,4-Dihydroxy-L-phenylalanine + Oxygen <=> 5-(L-Alanin-3-yl)-2-hydroxy-cis,cis-muconate 6-semialdehyde
R02077	C00355 + C00026 <=> C04045 + C00025	3,4-Dihydroxy-L-phenylalanine + 2-Oxoglutarate <=> 3-(3,4-Dihydroxyphenyl)pyruvate + L-Glutamate
R02080	C00355 <=> C03758 + C00011	3,4-Dihydroxy-L-phenylalanine <=> Dopamine + CO2
R02081	C00418 + C00010 + 2 C00003 <=> C00356 + 2 C00004 + 2 C00080	(R)-Mevalonate + CoA + 2 NAD+ <=> (S)-3-Hydroxy-3-methylglutaryl-CoA + 2 NADH + 2 H+
R02082	C00418 + C00010 + 2 C00006 <=> C00356 + 2 C00005 + 2 C00080	(R)-Mevalonate + CoA + 2 NADP+ <=> (S)-3-Hydroxy-3-methylglutaryl-CoA + 2 NADPH + 2 H+
R02083	C00356 + C00001 <=> C00010 + C03761	(S)-3-Hydroxy-3-methylglutaryl-CoA + H2O <=> CoA + 3-Hydroxy-3-methylglutarate
R02084	C00091 + C03761 <=> C00042 + C00356	Succinyl-CoA + 3-Hydroxy-3-methylglutarate <=> Succinate + (S)-3-Hydroxy-3-methylglutaryl-CoA
R02085	C00356 <=> C03231 + C00001	(S)-3-Hydroxy-3-methylglutaryl-CoA <=> 3-Methylglutaconyl-CoA + H2O
R02087	C00357 <=> C04257	N-Acetyl-D-glucosamine 6-phosphate <=> N-Acetyl-D-mannosamine 6-phosphate
R02088	C00360 + C00001 <=> C00559 + C00009	dAMP + H2O <=> Deoxyadenosine + Orthophosphate
R02089	C00002 + C00559 <=> C00008 + C00360	ATP + Deoxyadenosine <=> ADP + dAMP
R02090	C00002 + C00362 <=> C00008 + C00361	ATP + dGMP <=> ADP + dGDP
R02091	C00286 + C00475 <=> C00361 + C00055	dGTP + Cytidine <=> dGDP + CMP
R02092	C00363 + C00001 <=> C00364 + C00009	dTDP + H2O <=> dTMP + Orthophosphate
R02093	C00002 + C00363 <=> C00008 + C00459	ATP + dTDP <=> ADP + dTTP
R02094	C00002 + C00364 <=> C00008 + C00363	ATP + dTMP <=> ADP + dTDP
R02095	C00459 + C00001 <=> C00363 + C00009	dTTP + H2O <=> dTDP + Orthophosphate
R02096	C00459 + C00475 <=> C00363 + C00055	dTTP + Cytidine <=> dTDP + CMP
R02097	C00459 + C00299 <=> C00363 + C00105	dTTP + Uridine <=> dTDP + UMP
R02098	C00002 + C00365 <=> C00008 + C01346	ATP + dUMP <=> ADP + dUDP
R02099	C00002 + C00526 <=> C00008 + C00365	ATP + Deoxyuridine <=> ADP + dUMP
R02100	C00460 + C00001 <=> C00365 + C00013	dUTP + H2O <=> dUMP + Diphosphate
R02101	C00365 + C00143 <=> C00415 + C00364	dUMP + 5,10-Methylenetetrahydrofolate <=> Dihydrofolate + dTMP
R02102	C00365 + C00001 <=> C00526 + C00009	dUMP + H2O <=> Deoxyuridine + Orthophosphate
R02103	C00385 + C00003 + C00001 <=> C00366 + C00004 + C00080	Xanthine + NAD+ + H2O <=> Urate + NADH + H+
R02106	C00366 + C00007 + C00001 <=> C11821 + C00027	Urate + Oxygen + H2O <=> 5-Hydroxyisourate + Hydrogen peroxide
R02107	C00385 + C00001 + C00007 <=> C00366 + C00027	Xanthine + H2O + Oxygen <=> Urate + Hydrogen peroxide
R02113	C00029 + C00370 <=> C00015 + C03641	UDP-glucose + Sterol <=> UDP + Sterol 3-beta-D-glucoside
R02118	C00029 + C00371 <=> C00015 + C03423	UDP-glucose + Zeatin <=> UDP + O-beta-D-Glucosylzeatin
R02119	C00190 + C00371 <=> C00015 + C03300	UDP-D-xylose + Zeatin <=> UDP + O-beta-D-Xylosylzeatin
R02123	C00376 + C00003 + C00001 <=> C00777 + C00004 + C00080	Retinal + NAD+ + H2O <=> Retinoate + NADH + H+
R02124	C00473 + C00003 <=> C00376 + C00004 + C00080	Retinol + NAD+ <=> Retinal + NADH + H+
R02125	C00376 + C00007 + C00001 <=> C00777 + C00027	Retinal + Oxygen + H2O <=> Retinoate + Hydrogen peroxide
R02126	C00376 <=> C02110	Retinal <=> 11-cis-Retinal
R02129	C00376 <=> C05918	Retinal <=> all-trans-Dehydroretinal
R02132	C00378 + 2 C00007 + C00001 <=> C02892 + 2 C00027	Thiamine + 2 Oxygen + H2O <=> Thiamine acetic acid + 2 Hydrogen peroxide
R02133	C00378 + C00001 <=> C01279 + C04294 + C00080	Thiamine + H2O <=> 4-Amino-5-hydroxymethyl-2-methylpyrimidine + 5-(2-Hydroxyethyl)-4-methylthiazole + H+
R02134	C00002 + C00378 <=> C00008 + C01081	ATP + Thiamine <=> ADP + Thiamin monophosphate
R02135	C01081 + C00001 <=> C00378 + C00009	Thiamin monophosphate + H2O <=> Thiamine + Orthophosphate
R02136	C00002 + C00379 <=> C00008 + C02895	ATP + Xylitol <=> ADP + Xylitol 5-phosphate
R02137	C00475 + C00001 <=> C00380 + C00121	Cytidine + H2O <=> Cytosine + D-Ribose
R02139	C00813 + C00001 <=> C15607	Barbiturate + H2O <=> 3-Oxo-3-ureidopropanoate
R02141	C00385 + C00001 <=> C05515	Xanthine + H2O <=> 5-Ureido-4-imidazole carboxylate
R02142	C00655 + C00013 <=> C00385 + C00119	Xanthosine 5'-phosphate + Diphosphate <=> Xanthine + 5-Phospho-alpha-D-ribose 1-diphosphate
R02143	C01762 + C00001 <=> C00385 + C00121	Xanthosine + H2O <=> Xanthine + D-Ribose
R02144	C00019 + C00386 <=> C00021 + C01262	S-Adenosyl-L-methionine + Carnosine <=> S-Adenosyl-L-homocysteine + beta-Alanyl-N(pi)-methyl-L-histidine
R02145	C00387 + C00001 <=> C01762 + C00014	Guanosine + H2O <=> Xanthosine + Ammonia
R02147	C00387 + C00009 <=> C00242 + C00620	Guanosine + Orthophosphate <=> Guanine + alpha-D-Ribose 1-phosphate
R02148	C06193 + C00001 <=> C00387 + C00009	Guanosine 3'-phosphate + H2O <=> Guanosine + Orthophosphate
R02150	C00388 + C00007 + C00001 <=> C05130 + C00014 + C00027	Histamine + Oxygen + H2O <=> Imidazole-4-acetaldehyde + Ammonia + Hydrogen peroxide
R02152	C00388 + C00024 <=> C05135 + C00010	Histamine + Acetyl-CoA <=> 4-(beta-Acetylaminoethyl)imidazole + CoA
R02155	C00019 + C00388 <=> C00021 + C05127	S-Adenosyl-L-methionine + Histamine <=> S-Adenosyl-L-homocysteine + N-Methylhistamine
R02156	C00389 + C00007 <=> C04524 + C00237	Quercetin + Oxygen <=> 2-Protocatechoylphloroglucinolcarboxylate + CO
R02157	C00019 + C00389 <=> C00021 + C04443	S-Adenosyl-L-methionine + Quercetin <=> S-Adenosyl-L-homocysteine + 3-O-Methylquercetin
R02158	C00029 + C00389 <=> C00015 + C05623	UDP-glucose + Quercetin <=> UDP + Quercetin 3-O-glucoside
R02159	C00053 + C00389 <=> C00054 + C00616	3'-Phosphoadenylyl sulfate + Quercetin <=> Adenosine 3',5'-bisphosphate + Quercetin 3-sulfate
R02160	C01617 + C00026 + C00007 <=> C00389 + C00042 + C00011 + C00001	Taxifolin + 2-Oxoglutarate + Oxygen <=> Quercetin + Succinate + CO2 + H2O
R02167	C00644 + C00001 <=> C00392 + C00009	D-Mannitol 1-phosphate + H2O <=> Mannitol + Orthophosphate
R02168	C00394 + C00092 <=> C00035 + C00689	GDP-glucose + D-Glucose 6-phosphate <=> GDP + alpha,alpha'-Trehalose 6-phosphate
R02171	C03536 + C00001 <=> C00396 + C00117 + C00080	Pyrimidine 5'-nucleotide + H2O <=> Pyrimidine + D-Ribose 5-phosphate + H+
R02172	C03169 + C00001 <=> C00396 + C00121 + C00080	Pyrimidine nucleoside + H2O <=> Pyrimidine + D-Ribose + H+
R02173	C00398 + C00001 + C00007 <=> C00637 + C00014 + C00027	Tryptamine + H2O + Oxygen <=> Indole-3-acetaldehyde + Ammonia + Hydrogen peroxide
R02174	C00019 + C00398 <=> C00021 + C06213	S-Adenosyl-L-methionine + Tryptamine <=> S-Adenosyl-L-homocysteine + N-Methyltryptamine
R02175	C05805 + C00019 <=> C17568 + C00021	2-Hexaprenyl-3-methyl-5-hydroxy-6-methoxy-1,4-benzoquinone + S-Adenosyl-L-methionine <=> Ubiquinone-6 + S-Adenosyl-L-homocysteine
R02177	C00400 + C00006 <=> C00843 + C00005 + C00080	(-)-Menthol + NADP+ <=> (-)-Menthone + NADPH + H+
R02178	C00400 + C00007 + C00005 + C00080 <=> C02904 + C00006 + C00001	(-)-Menthol + Oxygen + NADPH + H+ <=> p-Menthane-3,8-diol + NADP+ + H2O
R02179	C00029 + C00400 <=> C00015 + C03962	UDP-glucose + (-)-Menthol <=> UDP + (-)-Menthyl O-beta-D-glucoside
R02193	C02666 + C00010 + C00006 <=> C00406 + C00005 + C00080	Coniferyl aldehyde + CoA + NADP+ <=> Feruloyl-CoA + NADPH + H+
R02194	C00002 + C01494 + C00010 <=> C00020 + C00013 + C00406	ATP + Ferulate + CoA <=> AMP + Diphosphate + Feruloyl-CoA
R02195	C00406 + C00296 <=> C00010 + C02572	Feruloyl-CoA + Quinate <=> CoA + 5-O-Feruloylquinic acid
R02196	C00407 + C00003 + C00001 <=> C00671 + C00014 + C00004 + C00080	L-Isoleucine + NAD+ + H2O <=> (S)-3-Methyl-2-oxopentanoic acid + Ammonia + NADH + H+
R02197	C00407 + C00001 + C00007 <=> C00671 + C00014 + C00027	L-Isoleucine + H2O + Oxygen <=> (S)-3-Methyl-2-oxopentanoic acid + Ammonia + Hydrogen peroxide
R02199	C00407 + C00026 <=> C00671 + C00025	L-Isoleucine + 2-Oxoglutarate <=> (S)-3-Methyl-2-oxopentanoic acid + L-Glutamate
R02200	C00183 + C00671 <=> C00141 + C00407	L-Valine + (S)-3-Methyl-2-oxopentanoic acid <=> 3-Methyl-2-oxobutanoic acid + L-Isoleucine
R02201	C00408 + C00003 <=> C04092 + C00004 + C00080	L-Pipecolate + NAD+ <=> Delta1-Piperideine-2-carboxylate + NADH + H+
R02203	C00408 + C00006 <=> C04092 + C00005 + C00080	L-Pipecolate + NADP+ <=> Delta1-Piperideine-2-carboxylate + NADPH + H+
R02204	C00408 + C00007 <=> C00450 + C00027	L-Pipecolate + Oxygen <=> (S)-2,3,4,5-Tetrahydropyridine-2-carboxylate + Hydrogen peroxide
R02205	C00408 + C00016 <=> C01352 + C00450	L-Pipecolate + FAD <=> FADH2 + (S)-2,3,4,5-Tetrahydropyridine-2-carboxylate
R02207	C04042 + C00003 <=> C00410 + C00004 + C00080	20alpha-Hydroxy-4-pregnen-3-one + NAD+ <=> Progesterone + NADH + H+
R02208	C03681 + C00006 <=> C00410 + C00005 + C00080	5alpha-Prege-3,20-dione + NADP+ <=> Progesterone + NADPH + H+
R02209	C04042 + C00006 <=> C00410 + C00005 + C00080	20alpha-Hydroxy-4-pregnen-3-one + NADP+ <=> Progesterone + NADPH + H+
R02210	C00410 + C00007 + C00005 + C00080 <=> C03027 + C00006 + C00001	Progesterone + Oxygen + NADPH + H+ <=> Testosterone acetate + NADP+ + H2O
R02216	C01953 + C00003 <=> C00410 + C00004 + C00080	Pregnenolone + NAD+ <=> Progesterone + NADH + H+
R02219	C00410 + C00005 + C00080 <=> C05479 + C00006	Progesterone + NADPH + H+ <=> 5beta-Prege-3,20-dione + NADP+
R02220	C05610 + C00010 + C00006 <=> C00411 + C00005 + C00080	Sinapoyl aldehyde + CoA + NADP+ <=> Sinapoyl-CoA + NADPH + H+
R02221	C00002 + C00482 + C00010 <=> C00020 + C00013 + C00411	ATP + Sinapate + CoA <=> AMP + Diphosphate + Sinapoyl-CoA
R02224	C00412 + C00083 + 2 C00005 + 2 C00080 <=> C02041 + C00011 + 2 C00006 + C00010 + C00001	Stearoyl-CoA + Malonyl-CoA + 2 NADPH + 2 H+ <=> Eicosanoyl-CoA + CO2 + 2 NADP+ + CoA + H2O
R02225	C00002 + C00413 <=> C00008 + C01138	ATP + Streptomycin <=> ADP + Streptomycin 6-phosphate
R02226	C00002 + C00413 <=> C00013 + C03462	ATP + Streptomycin <=> Diphosphate + 3''-Adenylylstreptomycin
R02227	C00002 + C00413 <=> C00008 + C03731	ATP + Streptomycin <=> ADP + Streptomycin 3''-phosphate
R02228	C01138 + C00001 <=> C00413 + C00009	Streptomycin 6-phosphate + H2O <=> Streptomycin + Orthophosphate
R02229	C00414 + C00004 + C00080 <=> C00854 + C00003	Cyclohexanone + NADH + H+ <=> Cyclohexanol + NAD+
R02231	C00414 + C00007 + C00005 + C00080 <=> C01880 + C00006 + C00001	Cyclohexanone + Oxygen + NADPH + H+ <=> epsilon-Caprolactone + NADP+ + H2O
R02232	C04316 <=> C00024 + C00414	(1-Hydroxycyclohexan-1-yl)acetyl-CoA <=> Acetyl-CoA + Cyclohexanone
R02233	C00571 + C00007 + C00001 <=> C00414 + C00027 + C00014	Cyclohexylamine + Oxygen + H2O <=> Cyclohexanone + Hydrogen peroxide + Ammonia
R02235	C00415 + C00003 <=> C00504 + C00004 + C00080	Dihydrofolate + NAD+ <=> Folate + NADH + H+
R02236	C00415 + C00006 <=> C00504 + C00005 + C00080	Dihydrofolate + NADP+ <=> Folate + NADPH + H+
R02237	C00002 + C00921 + C00025 <=> C00008 + C00009 + C00415	ATP + Dihydropteroate + L-Glutamate <=> ADP + Orthophosphate + Dihydrofolate
R02238	C00002 + C00058 + C00415 <=> C00008 + C00009 + C03204	ATP + Formate + Dihydrofolate <=> ADP + Orthophosphate + 10-Formyldihydrofolate
R02243	C00417 <=> C00490 + C00011	cis-Aconitate <=> Itaconate + CO2
R02244	C02341 <=> C00417	trans-Aconitate <=> cis-Aconitate
R02245	C00002 + C00418 <=> C00008 + C01107	ATP + (R)-Mevalonate <=> ADP + (R)-5-Phosphomevalonate
R02246	C00418 + C00003 <=> C00772 + C00004 + C00080	(R)-Mevalonate + NAD+ <=> Mevaldate + NADH + H+
R02247	C00418 + C00006 <=> C00772 + C00005 + C00080	(R)-Mevalonate + NADP+ <=> Mevaldate + NADPH + H+
R02252	C05629 + C00003 <=> C00423 + C00004 + C00080	Phenylpropanoate + NAD+ <=> trans-Cinnamate + NADH + H+
R02253	C00423 + C00007 + C00005 + C00080 <=> C00811 + C00006 + C00001	trans-Cinnamate + Oxygen + NADPH + H+ <=> 4-Coumarate + NADP+ + H2O
R02254	C00423 + C00007 + C00005 + C00080 <=> C01772 + C00006 + C00001	trans-Cinnamate + Oxygen + NADPH + H+ <=> trans-2-Hydroxycinnamate + NADP+ + H2O
R02255	C00002 + C00423 + C00010 <=> C00020 + C00013 + C00540	ATP + trans-Cinnamate + CoA <=> AMP + Diphosphate + Cinnamoyl-CoA
R02256	C00029 + C00423 <=> C00015 + C04164	UDP-glucose + trans-Cinnamate <=> UDP + trans-Cinnamoyl beta-D-glucoside
R02257	C00583 + C00003 <=> C00424 + C00004 + C00080	Propane-1,2-diol + NAD+ <=> (S)-Lactaldehyde + NADH + H+
R02258	C02917 + C00003 <=> C00424 + C00004 + C00080	(S)-Propane-1,2-diol + NAD+ <=> (S)-Lactaldehyde + NADH + H+
R02259	C00583 + C00006 <=> C00424 + C00005 + C00080	Propane-1,2-diol + NADP+ <=> (S)-Lactaldehyde + NADPH + H+
R02260	C00424 + C00006 <=> C00546 + C00005 + C00080	(S)-Lactaldehyde + NADP+ <=> Methylglyoxal + NADPH + H+
R02261	C03979 <=> C00424 + C00022	2-Dehydro-3-deoxy-L-rhamnonate <=> (S)-Lactaldehyde + Pyruvate
R02262	C01099 <=> C00111 + C00424	L-Fuculose 1-phosphate <=> Glycerone phosphate + (S)-Lactaldehyde
R02263	C01131 <=> C00111 + C00424	L-Rhamnulose 1-phosphate <=> Glycerone phosphate + (S)-Lactaldehyde
R02265	C00427 <=> C00584	Prostaglandin H2 <=> Prostaglandin E2
R02266	C00427 <=> C00696	Prostaglandin H2 <=> Prostaglandin D2
R02267	C00427 <=> C01312	Prostaglandin H2 <=> Prostaglandin I2
R02268	C00427 <=> C02198	Prostaglandin H2 <=> Thromboxane A2
R02269	C00429 + C00001 <=> C02642	5,6-Dihydrouracil + H2O <=> 3-Ureidopropionate
R02271	C00430 + C00022 <=> C02800 + C00041	5-Aminolevulinate + Pyruvate <=> 4,5-Dioxopentanoate + L-Alanine
R02272	C00430 <=> C03741	5-Aminolevulinate <=> (S)-4-Amino-5-oxopentanoate
R02273	C00990 + C00001 <=> C00431 + C00014	5-Aminopentanamide + H2O <=> 5-Aminopentanoate + Ammonia
R02274	C00431 + C00026 <=> C03273 + C00025	5-Aminopentanoate + 2-Oxoglutarate <=> 5-Oxopentanoate + L-Glutamate
R02276	C03087 + C00001 <=> C00033 + C00431	5-Acetamidopentanoate + H2O <=> Acetate + 5-Aminopentanoate
R02278	C00684 <=> C00433 + C00001	2-Dehydro-3-deoxy-L-arabinonate <=> 2,5-Dioxopentanoate + H2O
R02279	C00679 <=> C00433 + C00001 + C00011	5-Dehydro-4-deoxy-D-glucarate <=> 2,5-Dioxopentanoate + H2O + CO2
R02280	C04282 + C00001 <=> C00433 + C00014	1-Pyrroline-4-hydroxy-2-carboxylate + H2O <=> 2,5-Dioxopentanoate + Ammonia
R02282	C00437 + C00025 <=> C00077 + C00624	N-Acetylornithine + L-Glutamate <=> L-Ornithine + N-Acetyl-L-glutamate
R02283	C00437 + C00026 <=> C01250 + C00025	N-Acetylornithine + 2-Oxoglutarate <=> N-Acetyl-L-glutamate 5-semialdehyde + L-Glutamate
R02284	C03703 + C00001 <=> C00438	L-5-Carboxymethylhydantoin + H2O <=> N-Carbamoyl-L-aspartate
R02285	C00439 + C00001 <=> C00025 + C00488	N-Formimino-L-glutamate + H2O <=> L-Glutamate + Formamide
R02286	C00439 + C00001 <=> C01045 + C00014	N-Formimino-L-glutamate + H2O <=> N-Formyl-L-glutamate + Ammonia
R02287	C00664 + C00025 <=> C00101 + C00439	5-Formiminotetrahydrofolate + L-Glutamate <=> Tetrahydrofolate + N-Formimino-L-glutamate
R02288	C03680 + C00001 <=> C00439	4-Imidazolone-5-propanoate + H2O <=> N-Formimino-L-glutamate
R02291	C00441 + C00009 + C00006 <=> C03082 + C00005 + C00080	L-Aspartate 4-semialdehyde + Orthophosphate + NADP+ <=> 4-Phospho-L-aspartate + NADPH + H+
R02293	C03283 + C00022 <=> C00441 + C00041	L-2,4-Diaminobutanoate + Pyruvate <=> L-Aspartate 4-semialdehyde + L-Alanine
R02294	C03150 + C00009 <=> C00153 + C00620	Nicotinamide-beta-riboside + Orthophosphate <=> Nicotinamide + alpha-D-Ribose 1-phosphate
R02295	C05841 + C00009 <=> C00253 + C00620 + C00080	Nicotinate D-ribonucleoside + Orthophosphate <=> Nicotinate + alpha-D-Ribose 1-phosphate + H+
R02296	C00475 + C00009 <=> C00380 + C00620	Cytidine + Orthophosphate <=> Cytosine + alpha-D-Ribose 1-phosphate
R02297	C01762 + C00009 <=> C00385 + C00620	Xanthosine + Orthophosphate <=> Xanthine + alpha-D-Ribose 1-phosphate
R02298	C03169 + C00009 <=> C00396 + C00620 + C00080	Pyrimidine nucleoside + Orthophosphate <=> Pyrimidine + alpha-D-Ribose 1-phosphate + H+
R02300	C03479 <=> C00445 + C00001	Folinic acid <=> 5,10-Methenyltetrahydrofolate + H2O
R02301	C00002 + C03479 + C00080 <=> C00008 + C00009 + C00445	ATP + Folinic acid + H+ <=> ADP + Orthophosphate + 5,10-Methenyltetrahydrofolate
R02302	C00664 + C00080 <=> C00445 + C00014	5-Formiminotetrahydrofolate + H+ <=> 5,10-Methenyltetrahydrofolate + Ammonia
R02303	C00002 + C00448 <=> C00008 + C03115	ATP + trans,trans-Farnesyl diphosphate <=> ADP + Farnesyl triphosphate
R02305	C00448 <=> C01841 + C00013	trans,trans-Farnesyl diphosphate <=> Pentalenene + Diphosphate
R02306	C00448 <=> C01860 + C00013	trans,trans-Farnesyl diphosphate <=> Trichodiene + Diphosphate
R02307	C00448 <=> C02004 + C00013	trans,trans-Farnesyl diphosphate <=> Aristolochene + Diphosphate
R02310	C00448 <=> C06111	trans,trans-Farnesyl diphosphate <=> Nerolidyl diphosphate
R02311	C00448 <=> C06394 + C00013	trans,trans-Farnesyl diphosphate <=> delta-Cadinene + Diphosphate
R02313	C00449 + C00003 + C00001 <=> C00025 + C04076 + C00004 + C00080	N6-(L-1,3-Dicarboxypropyl)-L-lysine + NAD+ + H2O <=> L-Glutamate + L-2-Aminoadipate 6-semialdehyde + NADH + H+
R02315	C00449 + C00006 + C00001 <=> C00025 + C04076 + C00005 + C00080	N6-(L-1,3-Dicarboxypropyl)-L-lysine + NADP+ + H2O <=> L-Glutamate + L-2-Aminoadipate 6-semialdehyde + NADPH + H+
R02317	C00450 + C00001 <=> C04076	(S)-2,3,4,5-Tetrahydropyridine-2-carboxylate + H2O <=> L-2-Aminoadipate 6-semialdehyde
R02318	C00451 <=> C04617	(1R,2S)-1-Hydroxypropane-1,2,3-tricarboxylate <=> (1S,2S)-1-Hydroxypropane-1,2,3-tricarboxylate
R02322	C00455 + C00001 <=> C01185 + C00014	Nicotinamide D-ribonucleotide + H2O <=> Nicotinate D-ribonucleotide + Ammonia
R02323	C00455 + C00001 <=> C03150 + C00009	Nicotinamide D-ribonucleotide + H2O <=> Nicotinamide-beta-riboside + Orthophosphate
R02324	C00002 + C03150 <=> C00008 + C00455	ATP + Nicotinamide-beta-riboside <=> ADP + Nicotinamide D-ribonucleotide
R02325	C00458 + C00001 <=> C00460 + C00014	dCTP + H2O <=> dUTP + Ammonia
R02326	C00002 + C00705 <=> C00008 + C00458	ATP + dCDP <=> ADP + dCTP
R02327	C00458 + C00299 <=> C00705 + C00105	dCTP + Uridine <=> dCDP + UMP
R02328	C00459 + C00103 <=> C00013 + C00842	dTTP + D-Glucose 1-phosphate <=> Diphosphate + dTDP-glucose
R02329	C00459 + C00446 <=> C00013 + C02097	dTTP + alpha-D-Galactose 1-phosphate <=> Diphosphate + dTDP-galactose
R02330	C00460 + C00001 <=> C01346 + C00009	dUTP + H2O <=> dUDP + Orthophosphate
R02331	C00002 + C01346 <=> C00008 + C00460	ATP + dUDP <=> ADP + dUTP
R02332	C00460 + C00299 <=> C01346 + C00105	dUTP + Uridine <=> dUDP + UMP
R02338	C00463 + C00007 <=> C03574	Indole + Oxygen <=> 2-Formylaminobenzaldehyde
R02339	C00463 + C00007 + C00005 + C00080 <=> C05658 + C00001 + C00006	Indole + Oxygen + NADPH + H+ <=> Indoxyl + H2O + NADP+
R02340	C03506 <=> C00463 + C00118	Indoleglycerol phosphate <=> Indole + D-Glyceraldehyde 3-phosphate
R02341	C15586 + C00001 <=> C15587 + C00121	N-D-Ribosylpurine + H2O <=> Purine + D-Ribose
R02343	C00466 + C00003 <=> C00741 + C00004 + C00080	Acetoin + NAD+ <=> Diacetyl + NADH + H+
R02344	C03046 + C00003 <=> C00466 + C00004 + C00080	(S,S)-Butane-2,3-diol + NAD+ <=> Acetoin + NADH + H+
R02345	C00466 + C00117 <=> C00084 + C04359	Acetoin + D-Ribose 5-phosphate <=> Acetaldehyde + 1-Deoxy-D-altro-heptulose 7-phosphate
R02347	C02537 + C00003 <=> C00468 + C00004 + C00080	Estradiol-17alpha + NAD+ <=> Estrone + NADH + H+
R02349	C02537 + C00006 <=> C00468 + C00005 + C00080	Estradiol-17alpha + NADP+ <=> Estrone + NADPH + H+
R02350	C00053 + C00468 <=> C00054 + C02538	3'-Phosphoadenylyl sulfate + Estrone <=> Adenosine 3',5'-bisphosphate + Estrone 3-sulfate
R02352	C00951 + C00003 <=> C00468 + C00004 + C00080	Estradiol-17beta + NAD+ <=> Estrone + NADH + H+
R02353	C00951 + C00006 <=> C00468 + C00005 + C00080	Estradiol-17beta + NADP+ <=> Estrone + NADPH + H+
R02354	C00468 + C00080 + C00007 + C00004 <=> C05298 + C00003 + C00001	Estrone + H+ + Oxygen + NADH <=> 2-Hydroxyestrone + NAD+ + H2O
R02355	C00468 + C00080 + C00007 + C00005 <=> C05298 + C00006 + C00001	Estrone + H+ + Oxygen + NADPH <=> 2-Hydroxyestrone + NADP+ + H2O
R02356	C00468 + C00080 + C00007 + C00005 <=> C05300 + C00006 + C00001	Estrone + H+ + Oxygen + NADPH <=> 16alpha-Hydroxyestrone + NADP+ + H2O
R02358	C00468 + C00167 <=> C11133 + C00015	Estrone + UDP-glucuronate <=> Estrone glucuronide + UDP
R02359	C01537 + C00001 <=> C00469 + C00011 + C00014	Urethane + H2O <=> Ethanol + CO2 + Ammonia
R02363	2 C00530 + C00007 <=> 2 C00472 + 2 C00001	2 Hydroquinone + Oxygen <=> 2 p-Benzoquinone + 2 H2O
R02367	C00154 + C00473 <=> C00010 + C02588	Palmitoyl-CoA + Retinol <=> CoA + Retinyl palmitate
R02368	C02588 + C00001 <=> C00473 + C00249	Retinyl palmitate + H2O <=> Retinol + Hexadecanoic acid
R02369	C00473 <=> C00899	Retinol <=> 11-cis-Retinol
R02370	C05822 + C00001 <=> C00475 + C00009	3'-CMP + H2O <=> Cytidine + Orthophosphate
R02371	C00458 + C00475 <=> C00705 + C00055	dCTP + Cytidine <=> dCDP + CMP
R02372	C00460 + C00475 <=> C01346 + C00055	dUTP + Cytidine <=> dUDP + CMP
R02373	C00477 + C00007 <=> C02513 + C00027	Ecdysone + Oxygen <=> 3-Dehydroecdysone + Hydrogen peroxide
R02375	C00154 + C00477 <=> C00010 + C02681	Palmitoyl-CoA + Ecdysone <=> CoA + Ecdysone palmitate
R02376	C00583 <=> C00479 + C00001	Propane-1,2-diol <=> Propanal + H2O
R02377	C05979 + C00003 <=> C00479 + C00004 + C00080	Propane-1-ol + NAD+ <=> Propanal + NADH + H+
R02378	C00065 + C00481 <=> C01162 + C00001	L-Serine + Pyrazole <=> 3-(Pyrazol-1-yl)-L-alanine + H2O
R02379	C00019 + C05619 <=> C00021 + C00482	S-Adenosyl-L-methionine + 5-Hydroxyferulic acid methyl ester <=> S-Adenosyl-L-homocysteine + Sinapate
R02380	C00029 + C00482 <=> C00015 + C01175	UDP-glucose + Sinapate <=> UDP + 1-O-Sinapoyl-beta-D-glucose
R02381	C00933 + C00001 <=> C00482 + C00114	Sinapine + H2O <=> Sinapate + Choline
R02382	C00483 + C00001 + C00007 <=> C03765 + C00014 + C00027	Tyramine + H2O + Oxygen <=> 4-Hydroxyphenylacetaldehyde + Ammonia + Hydrogen peroxide
R02383	C00483 + C00007 + C00004 + C00080 <=> C03758 + C00003 + C00001	Tyramine + Oxygen + NADH + H+ <=> Dopamine + NAD+ + H2O
R02384	C00019 + C00483 <=> C00021 + C02442	S-Adenosyl-L-methionine + Tyramine <=> S-Adenosyl-L-homocysteine + N-Methyltyramine
R02385	C00406 + C00483 <=> C00010 + C02717	Feruloyl-CoA + Tyramine <=> CoA + N-Feruloyltyramine
R02387	C00024 + C00292 <=> C00010 + C07565	Acetyl-CoA + Aniline <=> CoA + Acetanilide
R02388	C00029 + C00292 <=> C00015 + C03142	UDP-glucose + Aniline <=> UDP + N-D-Glucosylarylamine
R02389	2 C00167 + C00486 <=> 2 C00015 + C05787	2 UDP-glucuronate + Bilirubin <=> 2 UDP + Bilirubin beta-diglucuronide
R02391	C00486 + C00003 <=> C00500 + C00004 + C00080	Bilirubin + NAD+ <=> Biliverdin + NADH + H+
R02393	C00486 + C00006 <=> C00500 + C00005 + C00080	Bilirubin + NADP+ <=> Biliverdin + NADPH + H+
R02394	2 C00486 + C00007 <=> 2 C00500 + 2 C00001	2 Bilirubin + Oxygen <=> 2 Biliverdin + 2 H2O
R02395	C00487 + C00003 <=> C02636 + C00004 + C00080	Carnitine + NAD+ <=> 3-Dehydrocarnitine + NADH + H+
R02396	C00024 + C00487 <=> C00010 + C02571	Acetyl-CoA + Carnitine <=> CoA + O-Acetylcarnitine
R02397	C01181 + C00026 + C00007 <=> C00487 + C00042 + C00011	4-Trimethylammoniobutanoate + 2-Oxoglutarate + Oxygen <=> Carnitine + Succinate + CO2
R02398	C00487 <=> C02224 + C00011	Carnitine <=> 2-Methylcholine + CO2
R02401	C03273 + C00003 + C00001 <=> C00489 + C00004 + C00080	5-Oxopentanoate + NAD+ + H2O <=> Glutarate + NADH + H+
R02402	C00002 + C00489 + C00010 <=> C00008 + C00009 + C00527	ATP + Glutarate + CoA <=> ADP + Orthophosphate + Glutaryl-CoA
R02404	C00002 + C00490 + C00010 <=> C00008 + C00009 + C00531	ATP + Itaconate + CoA <=> ADP + Orthophosphate + Itaconyl-CoA
R02405	C00044 + C00490 + C00010 <=> C00035 + C00009 + C00531	GTP + Itaconate + CoA <=> GDP + Orthophosphate + Itaconyl-CoA
R02406	C00081 + C00490 + C00010 <=> C00104 + C00009 + C00531	ITP + Itaconate + CoA <=> IDP + Orthophosphate + Itaconyl-CoA
R02407	C00091 + C00490 <=> C00042 + C00531	Succinyl-CoA + Itaconate <=> Succinate + Itaconyl-CoA
R02408	C00491 + C00001 <=> C00022 + C00014 + C01962	L-Cystine + H2O <=> Pyruvate + Ammonia + Thiocysteine
R02410	C00492 + C00001 <=> C05402 + C00095	Raffinose + H2O <=> Melibiose + D-Fructose
R02411	C01235 + C00089 <=> C00137 + C00492	alpha-D-Galactosyl-(1->3)-1D-myo-inositol + Sucrose <=> myo-Inositol + Raffinose
R02412	C00002 + C00493 <=> C00008 + C03175	ATP + Shikimate <=> ADP + Shikimate 3-phosphate
R02413	C00493 + C00006 <=> C02637 + C00005 + C00080	Shikimate + NADP+ <=> 3-Dehydroshikimate + NADPH + H+
R02415	C00493 + C00113 <=> C02637 + C01359	Shikimate + PQQ <=> 3-Dehydroshikimate + PQQH2
R02416	C00223 + C00493 <=> C00010 + C02947	p-Coumaroyl-CoA + Shikimate <=> CoA + 4-Coumaroylshikimate
R02417	C01448 + C00007 + C00005 + C00080 <=> C15504 + C00006	Questin + Oxygen + NADPH + H+ <=> Demethylsulochrin + NADP+
R02419	C00497 <=> C01384 + C00001	(R)-Malate <=> Maleic acid + H2O
R02422	C00499 + C00001 <=> C00603 + C00086	Allantoate + H2O <=> (S)-Ureidoglycolate + Urea
R02423	C00499 + C00001 <=> C02091 + C00014 + C00011	Allantoate + H2O <=> (S)-Ureidoglycine + Ammonia + CO2
R02425	C02350 + C00001 <=> C00499	(S)-Allantoin + H2O <=> Allantoate
R02426	C00501 <=> C01219 + C00001	CDP-glucose <=> CDP-4-dehydro-6-deoxy-D-glucose + H2O
R02427	C02266 + C00001 <=> C00502	D-Xylonolactone + H2O <=> D-Xylonate
R02428	C02753 + C00001 <=> C00502	D-Xylono-1,4-lactone + H2O <=> D-Xylonate
R02429	C00502 <=> C03826 + C00001	D-Xylonate <=> 2-Dehydro-3-deoxy-D-xylonate + H2O
R02430	C00002 + C00503 <=> C00008 + C03494	ATP + Erythritol <=> ADP + D-Erythritol 4-phosphate
R02433	C00506 + C00026 <=> C05528 + C00025	L-Cysteate + 2-Oxoglutarate <=> 3-Sulfopyruvate + L-Glutamate
R02434	C00506 + C00004 + C00080 <=> C00606 + C00001 + C00003	L-Cysteate + NADH + H+ <=> 3-Sulfino-L-alanine + H2O + NAD+
R02436	C01750 + C00001 <=> C00507 + C00389	Quercitrin + H2O <=> L-Rhamnose + Quercetin
R02437	C00507 <=> C00861	L-Rhamnose <=> L-Rhamnulose
R02438	C00507 <=> C02431	L-Rhamnose <=> L-Rhamnofuranose
R02439	C00002 + C00508 <=> C00008 + C01101	ATP + L-Ribulose <=> ADP + L-Ribulose 5-phosphate
R02441	C00532 + C00003 <=> C00508 + C00004 + C00080	L-Arabitol + NAD+ <=> L-Ribulose + NADH + H+
R02442	C00509 + C00005 + C00080 + C00007 <=> C05631 + C00006 + C00001	Naringenin + NADPH + H+ + Oxygen <=> Eriodictyol + NADP+ + H2O
R02444	C00509 + C00026 + C00007 <=> C00974 + C00042 + C00011	Naringenin + 2-Oxoglutarate + Oxygen <=> Dihydrokaempferol + Succinate + CO2
R02445	C00509 + C00026 + C00007 <=> C01477 + C00042 + C00011 + C00001	Naringenin + 2-Oxoglutarate + Oxygen <=> Apigenin + Succinate + CO2 + H2O
R02446	C00509 <=> C06561	Naringenin <=> Naringenin chalcone
R02447	3 C00083 + C00512 <=> 4 C00010 + C06356 + 3 C00011	3 Malonyl-CoA + Benzoyl-CoA <=> 4 CoA + 2,4,6-Trihydroxybenzophenone + 3 CO2
R02449	C00512 + C00007 + C00005 + C00080 <=> C05195 + C00006 + C00001	Benzoyl-CoA + Oxygen + NADPH + H+ <=> 3-Hydroxybenzoyl-CoA + NADP+ + H2O
R02450	C02137 + C00010 + C00003 <=> C00512 + C00011 + C00004 + C00080	alpha-Oxo-benzeneacetic acid + CoA + NAD+ <=> Benzoyl-CoA + CO2 + NADH + H+
R02452	C00512 + C00037 <=> C00010 + C01586	Benzoyl-CoA + Glycine <=> CoA + Hippurate
R02453	C00512 + C00108 <=> C00010 + C03141	Benzoyl-CoA + Anthranilate <=> CoA + N-Benzoylanthranilate
R02454	C00514 + C00003 <=> C00905 + C00004 + C00080	D-Mannonate + NAD+ <=> D-Fructuronate + NADH + H+
R02455	C00514 + C00003 <=> C02024 + C00004 + C00080	D-Mannonate + NAD+ <=> D-Mannuronate + NADH + H+
R02456	C00514 + C00006 <=> C02024 + C00005 + C00080	D-Mannonate + NADP+ <=> D-Mannuronate + NADPH + H+
R02457	C00515 + C00001 + C00007 <=> C01110 + C00014 + C00027	D-Ornithine + H2O + Oxygen <=> 5-Amino-2-oxopentanoic acid + Ammonia + Hydrogen peroxide
R02458	C00792 + C00001 <=> C00515 + C00086	D-Arginine + H2O <=> D-Ornithine + Urea
R02461	C00515 <=> C03943	D-Ornithine <=> (2R,4S)-2,4-Diaminopentanoate
R02462	C00823 + C00003 <=> C00517 + C00004 + C00080	1-Hexadecanol + NAD+ <=> Hexadecanal + NADH + H+
R02463	C00517 + C00006 <=> C06123 + C00005 + C00080	Hexadecanal + NADP+ <=> Hexadecenal + NADPH + H+
R02464	C01120 <=> C00346 + C00517	Sphinganine 1-phosphate <=> Ethanolamine phosphate + Hexadecanal
R02466	C00606 <=> C00519 + C00011	3-Sulfino-L-alanine <=> Hypotaurine + CO2
R02467	C01678 + C00007 <=> C00519	Cysteamine + Oxygen <=> Hypotaurine
R02468	C00521 + C00007 + C00005 + C00080 <=> C00964 + C00006 + C00001	(-)-Limonene + Oxygen + [Reduced NADPH---hemoprotein reductase] <=> (-)-trans-Carveol + [Oxidized NADPH---hemoprotein reductase] + H2O
R02469	C00521 + C00007 + C00005 + C00080 <=> C01123 + C00006 + C00001	(-)-Limonene + Oxygen + NADPH + H+ <=> (-)-trans-Isopiperitenol + NADP+ + H2O
R02470	C00521 + C00007 + C00005 + C00080 <=> C02452 + C00006 + C00001	(-)-Limonene + [Reduced NADPH---hemoprotein reductase] + Oxygen <=> Perillyl alcohol + [Oxidized NADPH---hemoprotein reductase] + H2O
R02471	C00522 + C00003 <=> C01053 + C00004 + C00080	(R)-Pantoate + NAD+ <=> (R)-4-Dehydropantoate + NADH + H+
R02472	C00522 + C00006 <=> C00966 + C00005 + C00080	(R)-Pantoate + NADP+ <=> 2-Dehydropantoate + NADPH + H+
R02473	C00002 + C00522 + C00099 <=> C00020 + C00013 + C00864	ATP + (R)-Pantoate + beta-Alanine <=> AMP + Diphosphate + Pantothenate
R02474	C00864 + C00001 <=> C00522 + C00099	Pantothenate + H2O <=> (R)-Pantoate + beta-Alanine
R02476	C00523 + C00003 <=> C00674 + C00004 + C00080	Androsterone + NAD+ <=> 5alpha-Androstane-3,17-dione + NADH + H+
R02477	C00523 + C00006 <=> C00674 + C00005 + C00080	Androsterone + NADP+ <=> 5alpha-Androstane-3,17-dione + NADPH + H+
R02478	C00523 + C00167 <=> C11135 + C00015	Androsterone + UDP-glucuronate <=> Androsterone glucuronide + UDP
R02481	C00024 + C00525 <=> C00010 + C03137	Acetyl-CoA + D-Tryptophan <=> CoA + N-Acetyl-D-tryptophan
R02482	C00083 + C00525 <=> C00010 + C03414	Malonyl-CoA + D-Tryptophan <=> CoA + N2-Malonyl-D-tryptophan
R02484	C00526 + C00009 <=> C00106 + C00672	Deoxyuridine + Orthophosphate <=> Uracil + 2-Deoxy-D-ribose 1-phosphate
R02485	C00881 + C00001 <=> C00526 + C00014	Deoxycytidine + H2O <=> Deoxyuridine + Ammonia
R02486	C00526 + C00026 + C00007 <=> C02674 + C00106 + C00042 + C00011	Deoxyuridine + 2-Oxoglutarate + Oxygen <=> Deoxyribonolactone + Uracil + Succinate + CO2
R02487	C00527 + C00016 <=> C01352 + C00877 + C00011	Glutaryl-CoA + FAD <=> FADH2 + Crotonoyl-CoA + CO2
R02489	C00628 <=> C00530 + C00011	2,5-Dihydroxybenzoate <=> Hydroquinone + CO2
R02490	C00904 <=> C00531 + C00001	Citramalyl-CoA <=> Itaconyl-CoA + H2O
R02491	C01011 <=> C00531 + C00001	(3S)-Citramalyl-CoA <=> Itaconyl-CoA + H2O
R02492	2 C00533 + C00004 + C00080 <=> C00887 + C00003 + C00001	2 Nitric oxide + NADH + H+ <=> Nitrous oxide + NAD+ + H2O
R02493	C00002 + C00534 <=> C00008 + C00647	ATP + Pyridoxamine <=> ADP + Pyridoxamine phosphate
R02494	C00534 + C00009 <=> C00647 + C00001	Pyridoxamine + Orthophosphate <=> Pyridoxamine phosphate + H2O
R02497	C03917 + C00006 <=> C00535 + C00005 + C00080	Dihydrotestosterone + NADP+ <=> Testosterone + NADPH + H+
R02498	C05293 + C00006 <=> C00535 + C00005 + C00080	5beta-Dihydrotestosterone + NADP+ <=> Testosterone + NADPH + H+
R02499	C00535 + C00080 + C00004 <=> C04295 + C00003	Testosterone + H+ + NADH <=> Androstenediol + NAD+
R02502	C00535 + C00167 <=> C11134 + C00015	Testosterone + UDP-glucuronate <=> Testosterone glucuronide + UDP
R02504	C02466 + C00001 <=> C00536	Trimetaphosphoric acid + H2O <=> Triphosphate
R02505	3 C00083 + C00540 <=> 4 C00010 + C01745 + 4 C00011	3 Malonyl-CoA + Cinnamoyl-CoA <=> 4 CoA + Pinosylvin + 4 CO2
R02506	C00903 + C00010 + C00006 <=> C00540 + C00005 + C00080	Cinnamaldehyde + CoA + NADP+ <=> Cinnamoyl-CoA + NADPH + H+
R02508	C00542 + C00042 <=> C01118 + C00097	Cystathionine + Succinate <=> O-Succinyl-L-homoserine + L-Cysteine
R02509	C03134 + C00001 <=> C00543 + C00058	N,N-Dimethylformamide + H2O <=> Dimethylamine + Formate
R02512	C01104 <=> C00543 + C00067	Trimethylamine N-oxide <=> Dimethylamine + Formaldehyde
R02513	C03626 + C00001 <=> C00543 + C00327	NG,NG-Dimethyl-L-arginine + H2O <=> Dimethylamine + L-Citrulline
R02514	C00642 + C00007 + C00004 + C00080 <=> C00544 + C00003 + C00001	4-Hydroxyphenylacetate + Oxygen + NADH + H+ <=> Homogentisate + NAD+ + H2O
R02515	C05593 + C00007 + C00004 + C00080 <=> C00544 + C00003 + C00001	3-Hydroxyphenylacetate + Oxygen + NADH + H+ <=> Homogentisate + NAD+ + H2O
R02516	C00642 + C00007 + C00005 + C00080 <=> C00544 + C00006 + C00001	4-Hydroxyphenylacetate + Oxygen + NADPH + H+ <=> Homogentisate + NADP+ + H2O
R02517	C05593 + C00007 + C00005 + C00080 <=> C00544 + C00006 + C00001	3-Hydroxyphenylacetate + Oxygen + NADPH + H+ <=> Homogentisate + NADP+ + H2O
R02518	C00544 + C00007 + C00005 <=> C05585 + C00011 + C00006 + C00080 + C00001	Homogentisate + Oxygen + NADPH <=> Gentisate aldehyde + CO2 + NADP+ + H+ + H2O
R02519	C00544 + C00007 <=> C01036	Homogentisate + Oxygen <=> 4-Maleylacetoacetate
R02520	C00544 + C00007 <=> C05585 + C00011 + C00001	Homogentisate + Oxygen <=> Gentisate aldehyde + CO2 + H2O
R02521	C01179 + C00007 <=> C00544 + C00011	3-(4-Hydroxyphenyl)pyruvate + Oxygen <=> Homogentisate + CO2
R02522	C00545 <=> C00684 + C00001	L-Arabinonate <=> 2-Dehydro-3-deoxy-L-arabinonate + H2O
R02526	C01114 + C00001 <=> C00545	L-Arabinono-1,4-lactone + H2O <=> L-Arabinonate
R02527	C00937 + C00003 <=> C00546 + C00004 + C00080	(R)-Lactaldehyde + NAD+ <=> Methylglyoxal + NADH + H+
R02528	C00546 + C00005 + C00080 <=> C05235 + C00006	Methylglyoxal + NADPH + H+ <=> Hydroxyacetone + NADP+
R02529	C01888 + C00001 + C00007 <=> C00546 + C00014 + C00027	Aminoacetone + H2O + Oxygen <=> Methylglyoxal + Ammonia + Hydrogen peroxide
R02530	C03451 <=> C00051 + C00546	(R)-S-Lactoylglutathione <=> Glutathione + Methylglyoxal
R02531	C05999 + C00003 <=> C00546 + C00004 + C00080	Lactaldehyde + NAD+ <=> Methylglyoxal + NADH + H+
R02532	C00547 + C00001 + C00007 <=> C05577 + C00014 + C00027	L-Noradrenaline + H2O + Oxygen <=> 3,4-Dihydroxymandelaldehyde + Ammonia + Hydrogen peroxide
R02533	C00019 + C00547 <=> C00021 + C00788	S-Adenosyl-L-methionine + L-Noradrenaline <=> S-Adenosyl-L-homocysteine + L-Adrenaline
R02534	C00019 + C00547 <=> C00021 + C05589	S-Adenosyl-L-methionine + L-Noradrenaline <=> S-Adenosyl-L-homocysteine + L-Normetanephrine
R02535	C03758 + C00072 + C00007 <=> C00547 + C05422 + C00001	Dopamine + Ascorbate + Oxygen <=> L-Noradrenaline + Dehydroascorbate + H2O
R02536	C00601 + C00003 + C00001 <=> C07086 + C00004 + C00080	Phenylacetaldehyde + NAD+ + H2O <=> Phenylacetic acid + NADH + H+
R02537	C00601 + C00006 + C00001 <=> C07086 + C00005 + C00080	Phenylacetaldehyde + NADP+ + H2O <=> Phenylacetic acid + NADPH + H+
R02539	C00002 + C07086 + C00010 <=> C00020 + C00013 + C00582	ATP + Phenylacetic acid + CoA <=> AMP + Diphosphate + Phenylacetyl-CoA
R02540	C02505 + C00001 <=> C07086 + C00014	2-Phenylacetamide + H2O <=> Phenylacetic acid + Ammonia
R02544	C00552 + C00003 <=> C00975 + C00004 + C00080	meso-Tartaric acid + NAD+ <=> Dihydroxyfumarate + NADH + H+
R02545	C00552 + C00003 <=> C03459 + C00004 + C00080	meso-Tartaric acid + NAD+ <=> 2-Hydroxy-3-oxosuccinate + NADH + H+
R02546	C00898 <=> C00552	(R,R)-Tartaric acid <=> meso-Tartaric acid
R02547	C03548 + C00001 <=> C00552	trans-2,3-Epoxysuccinate + H2O <=> meso-Tartaric acid
R02548	C00553 + C00006 <=> C00843 + C00005 + C00080	(+)-Neomenthol + NADP+ <=> (-)-Menthone + NADPH + H+
R02549	C00555 + C00003 + C00001 <=> C00334 + C00004 + C00080	4-Aminobutyraldehyde + NAD+ + H2O <=> 4-Aminobutanoate + NADH + H+
R02551	C03710 + C00001 <=> C00556 + C00011 + C00037	N-Benzyloxycarbonylglycine + H2O <=> Benzyl alcohol + CO2 + Glycine
R02552	C04335 + C00001 <=> C00556 + C00011 + C00123	N(alpha)-Benzyloxycarbonyl-L-leucine + H2O <=> Benzyl alcohol + CO2 + L-Leucine
R02553	C02020 + C00003 <=> C00557 + C00004 + C00080	Cyclopentanol + NAD+ <=> Cyclopentanone + NADH + H+
R02554	C00557 + C00007 + C00005 + C00080 <=> C02240 + C00006 + C00001	Cyclopentanone + Oxygen + NADPH + H+ <=> 5-Valerolactone + NADP+ + H2O
R02555	C00817 + C00003 <=> C00558 + C00004 + C00080	D-Altronate + NAD+ <=> D-Tagaturonate + NADH + H+
R02556	C00559 + C00001 <=> C05512 + C00014	Deoxyadenosine + H2O <=> Deoxyinosine + Ammonia
R02557	C00559 + C00009 <=> C00147 + C00672	Deoxyadenosine + Orthophosphate <=> Adenine + 2-Deoxy-D-ribose 1-phosphate
R02558	C00844 + C00001 <=> C00561 + C00031	Prunasin + H2O <=> Mandelonitrile + D-Glucose
R02559	C00565 + C00003 + C00001 <=> C01104 + C00004 + C00080	Trimethylamine + NAD+ + H2O <=> Trimethylamine N-oxide + NADH + H+
R02560	C00565 + C00016 + C00001 <=> C01352 + C01104	Trimethylamine + FAD + H2O <=> FADH2 + Trimethylamine N-oxide
R02561	C00568 + C00007 + C00004 + C00080 <=> C02372 + C00011 + C00003 + C00001	4-Aminobenzoate + Oxygen + NADH + H+ <=> 4-Hydroxyaniline + CO2 + NAD+ + H2O
R02562	C00568 + C00007 + C00005 + C00080 <=> C02372 + C00011 + C00006 + C00001	4-Aminobenzoate + Oxygen + NADPH + H+ <=> 4-Hydroxyaniline + CO2 + NADP+ + H2O
R02563	C00570 + C00065 <=> C00055 + C03872	CDP-ethanolamine + L-Serine <=> CMP + L-Serine-phosphoethanolamine
R02564	C02824 + C00001 <=> C00571 + C00059	Cyclohexylsulfamate + H2O <=> Cyclohexylamine + Sulfate
R02565	C00576 + C00003 + C00001 <=> C00719 + C00004 + 2 C00080	Betaine aldehyde + NAD+ + H2O <=> Betaine + NADH + 2 H+
R02566	C00576 + C00006 + C00001 <=> C00719 + C00005 + 2 C00080	Betaine aldehyde + NADP+ + H2O <=> Betaine + NADPH + 2 H+
R02568	C01094 <=> C00111 + C00577	D-Fructose 1-phosphate <=> Glycerone phosphate + D-Glyceraldehyde
R02572	C00019 + C00580 <=> C00021 + C01008	S-Adenosyl-L-methionine + Dimethyl sulfide <=> S-Adenosyl-L-homocysteine + Trimethylsulfonium
R02573	C01008 + C00101 <=> C00580 + C00440	Trimethylsulfonium + Tetrahydrofolate <=> Dimethyl sulfide + 5-Methyltetrahydrofolate
R02574	C04022 <=> C00580 + C00511	S,S-Dimethyl-beta-propiothetin <=> Dimethyl sulfide + Acrylic acid
R02575	C00002 + C00581 <=> C00008 + C03166	ATP + Guanidinoacetate <=> ADP + Phosphoguanidinoacetate
R02576	C00582 + C00064 <=> C00010 + C04148	Phenylacetyl-CoA + L-Glutamine <=> CoA + Phenylacetylglutamine
R02577	C00583 + C00006 <=> C05999 + C00005 + C00080	Propane-1,2-diol + NADP+ <=> Lactaldehyde + NADPH + H+
R02580	C00584 + C00003 <=> C04707 + C00004 + C00080	Prostaglandin E2 + NAD+ <=> (5Z,13E)-11alpha-Hydroxy-9,15-dioxoprost-13-enoate + NADH + H+
R02581	C00639 + C00006 <=> C00584 + C00005 + C00080	Prostaglandin F2alpha + NADP+ <=> Prostaglandin E2 + NADPH + H+
R02583	C00584 <=> C05953 + C00001	Prostaglandin E2 <=> Prostaglandin A2 + H2O
R02587	C06369 + C00001 <=> C00586 + C00009	2-Deoxy-D-glucose 6-phosphate + H2O <=> 2-Deoxy-D-glucose + Orthophosphate
R02589	C00587 + C00007 + C00004 + C00080 <=> C00628 + C00003 + C00001	3-Hydroxybenzoate + Oxygen + NADH + H+ <=> 2,5-Dihydroxybenzoate + NAD+ + H2O
R02590	C00063 + C06459 <=> C00013 + C05674	CTP + N-Trimethyl-2-aminoethylphosphonate <=> Diphosphate + CMP-N-trimethyl-2-aminoethylphosphonate
R02591	C00670 + C00001 <=> C00116 + C00588	sn-Glycero-3-phosphocholine + H2O <=> Glycerol + Choline phosphate
R02593	C00590 + C00006 <=> C02666 + C00005 + C00080	Coniferyl alcohol + NADP+ <=> Coniferyl aldehyde + NADPH + H+
R02594	C00029 + C00590 <=> C00015 + C00761	UDP-glucose + Coniferyl alcohol <=> UDP + Coniferin
R02595	C00761 + C00001 <=> C00590 + C00031	Coniferin + H2O <=> Coniferyl alcohol + D-Glucose
R02600	C00593 + C00005 + C00080 <=> C05123 + C00006	Sulfoacetaldehyde + NADPH + H+ <=> 2-Hydroxyethanesulfonate + NADP+
R02601	C00596 + C00001 <=> C03589	2-Hydroxy-2,4-pentadienoate + H2O <=> 4-Hydroxy-2-oxopentanoate
R02602	C03453 <=> C00596 + C00011	gamma-Oxalocrotonate <=> 2-Hydroxy-2,4-pentadienoate + CO2
R02603	C00596 + C00042 <=> C04479 + C00001	2-Hydroxy-2,4-pentadienoate + Succinate <=> 2-Hydroxy-6-oxonona-2,4-diene-1,9-dioate + H2O
R02604	C00596 + C00058 <=> C00682 + C00001	2-Hydroxy-2,4-pentadienoate + Formate <=> 2-Hydroxymuconate semialdehyde + H2O
R02605	C04075 + C00001 <=> C00596 + C00698 + C00014	2-Amino-4-chloro-4-pentenoic acid + H2O <=> 2-Hydroxy-2,4-pentadienoate + Cl- + Ammonia
R02606	C01273 + C00001 <=> C00180 + C00596	2-Hydroxy-6-oxo-6-phenylhexa-2,4-dienoate + H2O <=> Benzoate + 2-Hydroxy-2,4-pentadienoate
R02609	C03091 + C00006 <=> C00599 + C00005 + C00080	5beta-Cholestan-3-one + NADP+ <=> Cholest-4-en-3-one + NADPH + H+
R02610	C03238 + C00006 <=> C00599 + C00005 + C00080	5alpha-Cholestan-3-one + NADP+ <=> Cholest-4-en-3-one + NADPH + H+
R02611	C05853 + C00003 <=> C00601 + C00004 + C00080	Phenylethyl alcohol + NAD+ <=> Phenylacetaldehyde + NADH + H+
R02613	C05332 + C00007 + C00001 <=> C00601 + C00014 + C00027	Phenethylamine + Oxygen + H2O <=> Phenylacetaldehyde + Ammonia + Hydrogen peroxide
R02615	C02083 <=> C00601	Styrene oxide <=> Phenylacetaldehyde
R02618	C00606 + C00003 + C00001 <=> C05527 + C00014 + C00004 + C00080	3-Sulfino-L-alanine + NAD+ + H2O <=> 3-Sulfinylpyruvate + Ammonia + NADH + H+
R02619	C00606 + C00026 <=> C05527 + C00025	3-Sulfino-L-alanine + 2-Oxoglutarate <=> 3-Sulfinylpyruvate + L-Glutamate
R02632	C00053 + C00616 <=> C00054 + C01155	3'-Phosphoadenylyl sulfate + Quercetin 3-sulfate <=> Adenosine 3',5'-bisphosphate + Quercetin 3,3'-bissulfate
R02633	C00053 + C00616 <=> C00054 + C01156	3'-Phosphoadenylyl sulfate + Quercetin 3-sulfate <=> Adenosine 3',5'-bisphosphate + Quercetin 3,4'-bissulfate
R02634	C00617 + C00013 <=> C04037 + C00075	UDP-D-galacturonate + Diphosphate <=> 1-Phospho-alpha-D-galacturonate + UTP
R02636	C00617 <=> C00935 + C00011	UDP-D-galacturonate <=> UDP-L-arabinose + CO2
R02637	C00618 + C00003 <=> C04575 + C00004 + C00080	3-Dehydro-L-gulonate + NAD+ <=> (4R,5S)-4,5,6-Trihydroxy-2,3-dioxohexanoate + NADH + H+
R02639	C00618 + C00006 <=> C04575 + C00005 + C00080	3-Dehydro-L-gulonate + NADP+ <=> (4R,5S)-4,5,6-Trihydroxy-2,3-dioxohexanoate + NADPH + H+
R02640	C00800 + C00003 <=> C00618 + C00004 + C00080	L-Gulonate + NAD+ <=> 3-Dehydro-L-gulonate + NADH + H+
R02644	C01034 <=> C00619	3-Oxo-Delta5-steroid <=> 3-Oxo-Delta4-steroid
R02646	C05513 + C00009 <=> C00366 + C00620	Urate-3-ribonucleoside + Orthophosphate <=> Urate + alpha-D-Ribose 1-phosphate
R02648	C03947 + C00001 <=> C03189	Glycerol 1,2-cyclic phosphate + H2O <=> DL-Glycerol 1-phosphate
R02649	C00002 + C00624 <=> C00008 + C04133	ATP + N-Acetyl-L-glutamate <=> ADP + N-Acetyl-L-glutamate 5-phosphate
R02655	C05585 + C00003 + C00001 <=> C00628 + C00004 + C00080	Gentisate aldehyde + NAD+ + H2O <=> 2,5-Dihydroxybenzoate + NADH + H+
R02656	C00628 + C00007 <=> C02167	2,5-Dihydroxybenzoate + Oxygen <=> Maleylpyruvate
R02657	C00628 + C00027 <=> C05585 + C00007 + C00001	2,5-Dihydroxybenzoate + Hydrogen peroxide <=> Gentisate aldehyde + Oxygen + H2O
R02658	C00002 + C06473 <=> C00008 + C01218	ATP + 2-Keto-D-gluconic acid <=> ADP + 6-Phospho-2-dehydro-D-gluconate
R02659	C06473 <=> C06440 + C00001	2-Keto-D-gluconic acid <=> 2-Dehydro-D-glucono-1,5-lactone + H2O
R02664	C00631 + C00002 <=> C01159 + C00008	2-Phospho-D-glycerate + ATP <=> 2,3-Bisphospho-D-glycerate + ADP
R02665	C00632 + C00007 <=> C04409	3-Hydroxyanthranilate + Oxygen <=> 2-Amino-3-carboxymuconate semialdehyde
R02666	C00632 + C00007 <=> C04584 + C00027	3-Hydroxyanthranilate + Oxygen <=> 6-Imino-5-oxocyclohexa-1,3-dienecarboxylate + Hydrogen peroxide
R02667	C00019 + C00632 <=> C00021 + C03986	S-Adenosyl-L-methionine + 3-Hydroxyanthranilate <=> S-Adenosyl-L-homocysteine + 3-Hydroxy-4-methylanthranilate
R02668	C03227 + C00001 <=> C00632 + C00041	3-Hydroxy-L-kynurenine + H2O <=> 3-Hydroxyanthranilate + L-Alanine
R02669	C00632 <=> C01987 + C00011	3-Hydroxyanthranilate <=> 2-Aminophenol + CO2
R02670	2 C00632 + 4 C00007 <=> C05640 + 2 C00704 + 2 C00027 + 2 C00080	2 3-Hydroxyanthranilate + 4 Oxygen <=> Cinnavalininate + 2 O2.- + 2 Hydrogen peroxide + 2 H+
R02671	C00632 + C00019 <=> C05831 + C00021	3-Hydroxyanthranilate + S-Adenosyl-L-methionine <=> 3-Methoxyanthranilate + S-Adenosyl-L-homocysteine
R02672	C03590 <=> C00633 + C00011	4-Hydroxyphenylglyoxylate <=> 4-Hydroxybenzaldehyde + CO2
R02673	C03198 + C00007 <=> C00633 + C00027 + C00011	(S)-4-Hydroxymandelate + Oxygen <=> 4-Hydroxybenzaldehyde + Hydrogen peroxide + CO2
R02676	C03742 <=> C01326 + C00633	(S)-4-Hydroxymandelonitrile <=> Hydrogen cyanide + 4-Hydroxybenzaldehyde
R02677	C06192 + C00001 <=> C00020 + C00636	ADP-mannose + H2O <=> AMP + D-Mannose 1-phosphate
R02678	C00637 + C00003 + C00001 <=> C00954 + C00004 + C00080	Indole-3-acetaldehyde + NAD+ + H2O <=> Indole-3-acetate + NADH + H+
R02679	C00955 + C00003 <=> C00637 + C00004 + C00080	Indole-3-ethanol + NAD+ <=> Indole-3-acetaldehyde + NADH + H+
R02680	C00955 + C00006 <=> C00637 + C00005 + C00080	Indole-3-ethanol + NADP+ <=> Indole-3-acetaldehyde + NADPH + H+
R02681	C00637 + C00007 + C00001 <=> C00954 + C00027	Indole-3-acetaldehyde + Oxygen + H2O <=> Indole-3-acetate + Hydrogen peroxide
R02683	C00639 + C00003 <=> C05960 + C00004 + C00080	Prostaglandin F2alpha + NAD+ <=> 15-Keto-prostaglandin F2alpha + NADH + H+
R02684	C00639 + C00006 <=> C00696 + C00005 + C00080	Prostaglandin F2alpha + NADP+ <=> Prostaglandin D2 + NADPH + H+
R02695	C03765 + C00003 + C00001 <=> C00642 + C00004 + C00080	4-Hydroxyphenylacetaldehyde + NAD+ + H2O <=> 4-Hydroxyphenylacetate + NADH + H+
R02697	C03765 + C00006 + C00001 <=> C00642 + C00005 + C00080	4-Hydroxyphenylacetaldehyde + NADP+ + H2O <=> 4-Hydroxyphenylacetate + NADPH + H+
R02698	C00642 + C00007 + C00004 + C00080 <=> C01161 + C00003 + C00001	4-Hydroxyphenylacetate + Oxygen + NADH + H+ <=> 3,4-Dihydroxyphenylacetate + NAD+ + H2O
R02699	C00002 + C00642 + C00010 <=> C00020 + C00013 + C05338	ATP + 4-Hydroxyphenylacetate + CoA <=> AMP + Diphosphate + 4-Hydroxyphenylacetyl-CoA
R02700	C00643 + C00026 <=> C05646 + C00025	5-Hydroxy-L-tryptophan + 2-Oxoglutarate <=> 5-Hydroxyindolepyruvate + L-Glutamate
R02701	C00643 <=> C00780 + C00011	5-Hydroxy-L-tryptophan <=> Serotonin + CO2
R02702	C00643 + C00007 <=> C05648	5-Hydroxy-L-tryptophan + Oxygen <=> 5-Hydroxy-N-formylkynurenine
R02703	C00644 + C00003 <=> C05345 + C00004 + C00080	D-Mannitol 1-phosphate + NAD+ <=> beta-D-Fructose 6-phosphate + NADH + H+
R02705	C00002 + C00645 <=> C00008 + C04257	ATP + N-Acetyl-D-mannosamine <=> ADP + N-Acetyl-D-mannosamine 6-phosphate
R02706	C00645 + C00009 <=> C04257 + C00001	N-Acetyl-D-mannosamine + Orthophosphate <=> N-Acetyl-D-mannosamine 6-phosphate + H2O
R02707	C00645 + C00015 <=> C01170 + C00001	N-Acetyl-D-mannosamine + UDP <=> UDP-N-acetyl-D-mannosamine + H2O
R02709	C00029 + C00650 <=> C00015 + C01855	UDP-glucose + 4-Hydroxymandelonitrile <=> UDP + Taxiphyllin
R02711	C00002 + C00651 + C00014 <=> C00020 + C00013 + C01109	ATP + 4-Methylene-L-glutamate + Ammonia <=> AMP + Diphosphate + 4-Methylene-L-glutamine
R02712	C01109 + C00001 <=> C00651 + C00014	4-Methylene-L-glutamine + H2O <=> 4-Methylene-L-glutamate + Ammonia
R02714	C00652 + C00001 <=> C00878	D-Arabinono-1,4-lactone + H2O <=> D-Arabinonate
R02715	C00652 + C00007 <=> C06316 + C00027	D-Arabinono-1,4-lactone + Oxygen <=> Dehydro-D-arabinono-1,4-lactone + Hydrogen peroxide
R02719	C00655 + C00001 <=> C01762 + C00009	Xanthosine 5'-phosphate + H2O <=> Xanthosine + Orthophosphate
R02720	C00700 + C00001 <=> C00655 + C00013	XTP + H2O <=> Xanthosine 5'-phosphate + Diphosphate
R02722	C00065 + C03506 <=> C00078 + C00118 + C00001	L-Serine + Indoleglycerol phosphate <=> L-Tryptophan + D-Glyceraldehyde 3-phosphate + H2O
R02727	C01083 + C00009 <=> C00031 + C00663	alpha,alpha-Trehalose + Orthophosphate <=> D-Glucose + beta-D-Glucose 1-phosphate
R02728	C00663 <=> C01172	beta-D-Glucose 1-phosphate <=> beta-D-Glucose 6-phosphate
R02729	C00664 + C00037 <=> C00101 + C02718	5-Formiminotetrahydrofolate + Glycine <=> Tetrahydrofolate + N-Formiminoglycine
R02730	C00665 + C00001 <=> C03267 + C00009	beta-D-Fructose 2,6-bisphosphate + H2O <=> beta-D-Fructose 2-phosphate + Orthophosphate
R02731	C00665 + C00001 <=> C05345 + C00009	beta-D-Fructose 2,6-bisphosphate + H2O <=> beta-D-Fructose 6-phosphate + Orthophosphate
R02732	C00002 + C05345 <=> C00008 + C00665	ATP + beta-D-Fructose 6-phosphate <=> ADP + beta-D-Fructose 2,6-bisphosphate
R02733	C04390 + C00001 <=> C00033 + C00666	N6-Acetyl-LL-2,6-diaminoheptanedioate + H2O <=> Acetate + LL-2,6-Diaminoheptanedioate
R02734	C04421 + C00001 <=> C00042 + C00666	N-Succinyl-LL-2,6-diaminoheptanedioate + H2O <=> Succinate + LL-2,6-Diaminoheptanedioate
R02735	C00666 <=> C00680	LL-2,6-Diaminoheptanedioate <=> meso-2,6-Diaminoheptanedioate
R02736	C01172 + C00006 <=> C01236 + C00005 + C00080	beta-D-Glucose 6-phosphate + NADP+ <=> D-Glucono-1,5-lactone 6-phosphate + NADPH + H+
R02737	C00029 + C00668 <=> C00015 + C00689	UDP-glucose + alpha-D-Glucose 6-phosphate <=> UDP + alpha,alpha'-Trehalose 6-phosphate
R02739	C00668 <=> C01172	alpha-D-Glucose 6-phosphate <=> beta-D-Glucose 6-phosphate
R02740	C00668 <=> C05345	alpha-D-Glucose 6-phosphate <=> beta-D-Fructose 6-phosphate
R02741	C00002 + C00669 + C00099 <=> C00008 + C00009 + C04544	ATP + gamma-L-Glutamyl-L-cysteine + beta-Alanine <=> ADP + Orthophosphate + gamma-L-Glutamyl-L-cysteinyl-beta-alanine
R02742	2 C00669 + C00006 <=> C03646 + C00005 + C00080	2 gamma-L-Glutamyl-L-cysteine + NADP+ <=> Bis-gamma-glutamylcystine + NADPH + H+
R02743	C00669 <=> C01879 + C00097	gamma-L-Glutamyl-L-cysteine <=> 5-Oxoproline + L-Cysteine
R02748	C05512 + C00009 <=> C00262 + C00672	Deoxyinosine + Orthophosphate <=> Hypoxanthine + 2-Deoxy-D-ribose 1-phosphate
R02749	C00672 <=> C00673	2-Deoxy-D-ribose 1-phosphate <=> 2-Deoxy-D-ribose 5-phosphate
R02750	C00673 + C00008 <=> C01801 + C00002	2-Deoxy-D-ribose 5-phosphate + ADP <=> Deoxyribose + ATP
R02752	C00818 <=> C00679 + C00001	D-Glucarate <=> 5-Dehydro-4-deoxy-D-glucarate + H2O
R02754	C00679 <=> C00022 + C01146	5-Dehydro-4-deoxy-D-glucarate <=> Pyruvate + 2-Hydroxy-3-oxopropanoate
R02755	C00680 + C00006 + C00001 <=> C03871 + C00014 + C00005 + C00080	meso-2,6-Diaminoheptanedioate + NADP+ + H2O <=> L-2-Amino-6-oxoheptanedioate + Ammonia + NADPH + H+
R02762	C00682 + C00003 + C00001 <=> C02501 + C00004 + C00080	2-Hydroxymuconate semialdehyde + NAD+ + H2O <=> 2-Hydroxymuconate + NADH + H+
R02763	C00682 + C00011 <=> C04480	2-Hydroxymuconate semialdehyde + CO2 <=> 3-Carboxy-2-hydroxymuconate semialdehyde
R02764	C00683 + C00001 <=> C02170 + C00010	(S)-Methylmalonyl-CoA + H2O <=> Methylmalonate + CoA
R02765	C01213 <=> C00683	(R)-Methylmalonyl-CoA <=> (S)-Methylmalonyl-CoA
R02772	C06018 + C00026 + C00010 <=> C11907 + C00025 + C00024	dTDP-4-acetamido-4,6-dideoxy-D-glucose + 2-Oxoglutarate + CoA <=> dTDP-4-oxo-6-deoxy-D-glucose + L-Glutamate + Acetyl-CoA
R02773	C04268 + C00026 <=> C11907 + C00025	dTDP-4-amino-4,6-dideoxy-D-glucose + 2-Oxoglutarate <=> dTDP-4-oxo-6-deoxy-D-glucose + L-Glutamate
R02776	C03187 + C00006 <=> C00688 + C00005 + C00080	dTDP-6-deoxy-beta-L-talose + NADP+ <=> dTDP-4-dehydro-beta-L-rhamnose + NADPH + H+
R02777	C03319 + C00006 <=> C00688 + C00005 + C00080	dTDP-L-rhamnose + NADP+ <=> dTDP-4-dehydro-beta-L-rhamnose + NADPH + H+
R02778	C00689 + C00001 <=> C01083 + C00009	alpha,alpha'-Trehalose 6-phosphate + H2O <=> alpha,alpha-Trehalose + Orthophosphate
R02781	C00064 + C00691 <=> C00940 + C01214	L-Glutamine + 2,4,6/3,5-Pentahydroxycyclohexanone <=> 2-Oxoglutaramate + 1-Amino-1-deoxy-scyllo-inositol
R02782	C00691 <=> C04287 + C00001	2,4,6/3,5-Pentahydroxycyclohexanone <=> 3D-3,5/4-Trihydroxycyclohexane-1,2-dione + H2O
R02783	C00002 + C01212 + C00217 <=> C00008 + C00009 + C00692	ATP + UDP-N-acetylmuramoyl-L-alanine + D-Glutamate <=> ADP + Orthophosphate + UDP-N-acetylmuramoyl-L-alanyl-D-glutamate
R02786	C00002 + C00692 + C00047 <=> C00008 + C00009 + C05892	ATP + UDP-N-acetylmuramoyl-L-alanyl-D-glutamate + L-Lysine <=> ADP + Orthophosphate + UDP-N-acetylmuramoyl-L-alanyl-gamma-D-glutamyl-L-lysine
R02788	C00002 + C00692 + C00680 <=> C00008 + C00009 + C04877	ATP + UDP-N-acetylmuramoyl-L-alanyl-D-glutamate + meso-2,6-Diaminoheptanedioate <=> ADP + Orthophosphate + UDP-N-acetylmuramoyl-L-alanyl-gamma-D-glutamyl-meso-2,6-diaminopimelate
R02792	C00695 + C00003 <=> C04643 + C00004 + C00080	Cholic acid + NAD+ <=> 7-Oxodeoxycholate + NADH + H+
R02793	C00695 + C00006 <=> C01292 + C00005 + C00080	Cholic acid + NADP+ <=> 3alpha,7alpha-Dihydroxy-12-oxo-5beta-cholanate + NADPH + H+
R02794	C00002 + C00695 + C00010 <=> C00020 + C00013 + C01794	ATP + Cholic acid + CoA <=> AMP + Diphosphate + Choloyl-CoA
R02797	C05122 + C00001 <=> C00695 + C00245	Taurocholate + H2O <=> Cholic acid + Taurine
R02798	C00695 <=> C11637 + C00001	Cholic acid <=> 3alpha,12alpha-Dihydroxy-5beta-chol-6-enoate + H2O
R02799	C05959 + C00006 <=> C00696 + C00080 + C00005	11-epi-Prostaglandin F2alpha + NADP+ <=> Prostaglandin D2 + H+ + NADPH
R02800	C00696 + C00006 <=> C04758 + C00005 + C00080	Prostaglandin D2 + NADP+ <=> (5Z,13E)-9alpha-Hydroxy-11,15-dioxoprosta-5,13-dienoate + NADPH + H+
R02801	C00696 <=> C05957 + C00001	Prostaglandin D2 <=> Prostaglandin J2 + H2O
R02805	C04392 + C00001 <=> C00700 + C00655	P1,P4-Bis(5'-xanthosyl) tetraphosphate + H2O <=> XTP + Xanthosine 5'-phosphate
R02807	C01319 + C00006 + C00080 <=> C00703 + C00005	Hg + NADP+ + H+ <=> Mercury(2+) + NADPH
R02810	2 C00708 + C00027 + 2 C00080 <=> C01382 + 2 C00001	2 Iodide + Hydrogen peroxide + 2 H+ <=> Iodine + 2 H2O
R02813	C03195 <=> C00712 + C00001	(R)-10-Hydroxystearate <=> (9Z)-Octadecenoic acid + H2O
R02815	C00715 + C00001 <=> C03212 + C00014	Pterin + H2O <=> 2,4-Dihydroxypteridine + Ammonia
R02817	C03872 + C00001 <=> C00065 + C00346	L-Serine-phosphoethanolamine + H2O <=> L-Serine + Ethanolamine phosphate
R02821	C00719 + C00155 <=> C01026 + C00073	Betaine + L-Homocysteine <=> N,N-Dimethylglycine + L-Methionine
R02825	C00431 <=> C00763	5-Aminopentanoate <=> D-Proline
R02830	C00727 + C00007 + C00004 + C00080 <=> C03338 + C00003 + C00001	Orcinol + Oxygen + NADH + H+ <=> 2,3,5-Trihydroxytoluene + NAD+ + H2O
R02831	C01839 <=> C00727 + C00011	Orsellinate <=> Orcinol + CO2
R02832	C00729 + C00006 <=> C00783 + C00005 + C00080	Tropine + NADP+ <=> Tropinone + NADPH + H+
R02834	C00735 + C00003 <=> C00762 + C00004 + C00080	Cortisol + NAD+ <=> Cortisone + NADH + H+
R02836	C00735 + C00006 <=> C00762 + C00005 + C00080	Cortisol + NADP+ <=> Cortisone + NADPH + H+
R02837	C00024 + C00735 <=> C00010 + C02821	Acetyl-CoA + Cortisol <=> CoA + Cortisol 21-acetate
R02839	C00053 + C00735 <=> C00054 + C02822	3'-Phosphoadenylyl sulfate + Cortisol <=> Adenosine 3',5'-bisphosphate + Cortisol 21-sulfate
R02840	C00735 + C00080 + C00004 <=> C05489 + C00003	Cortisol + H+ + NADH <=> 11beta,17alpha,21-Trihydroxypregnenolone + NAD+
R02841	C05471 + C00006 <=> C00735 + C00005 + C00080	11beta,17alpha,21-Trihydroxy-5beta-prege-3,20-dione + NADP+ <=> Cortisol + NADPH + H+
R02846	C00736 + C00177 <=> C00283 + C02512	Cysteine + Cyanide ion <=> Hydrogen sulfide + 3-Cyano-L-alanine
R02848	C00002 + C00738 <=> C00008 + C02965	ATP + D-Hexose <=> ADP + D-Hexose 6-phosphate
R02849	C00081 + C00738 <=> C00104 + C02965	ITP + D-Hexose <=> IDP + D-Hexose 6-phosphate
R02850	C00131 + C00738 <=> C00206 + C02965	dATP + D-Hexose <=> dADP + D-Hexose 6-phosphate
R02852	C00739 <=> C05161	D-Lysine <=> (2R,5S)-2,5-Diaminohexanoate
R02853	C02532 + C00001 <=> C00740 + C00009	O-Phospho-D-serine + H2O <=> D-Serine + Orthophosphate
R02855	C00810 + C00003 <=> C00741 + C00004 + C00080	(R)-Acetoin + NAD+ <=> Diacetyl + NADH + H+
R02856	C00810 + C00006 <=> C00741 + C00005 + C00080	(R)-Acetoin + NADP+ <=> Diacetyl + NADPH + H+
R02857	C16487 + C00160 <=> C06108 + C00001	Hydrofluoric acid + Glycolate <=> Fluoroacetate + H2O
R02858	C00019 + C00744 <=> C00021 + C01457	S-Adenosyl-L-methionine + Macrocin <=> S-Adenosyl-L-homocysteine + Tylosin
R02859	C00019 + C02400 <=> C00021 + C00744	S-Adenosyl-L-methionine + Demethylmacrocin <=> S-Adenosyl-L-homocysteine + Macrocin
R02861	C00745 + C00011 + C00080 <=> C06178 + C00253	Nicotine + CO2 + H+ <=> 1-Methylpyrrolinium + Nicotinate
R02862	C00019 + C00747 <=> C00021 + C02724	S-Adenosyl-L-methionine + Pyridine <=> S-Adenosyl-L-homocysteine + N-Methylpyridinium
R02863	C00378 + C00747 <=> C02691 + C04294	Thiamine + Pyridine <=> Heteropyrithiamine + 5-(2-Hydroxyethyl)-4-methylthiazole
R02864	C00748 + 2 C00080 <=> C14818 + C05778	Siroheme + 2 H+ <=> Fe2+ + Sirohydrochlorin
R02865	C00002 + C00794 <=> C00008 + C01096	ATP + D-Sorbitol <=> ADP + Sorbitol 6-phosphate
R02866	C01096 + C00001 <=> C00794 + C00009	Sorbitol 6-phosphate + H2O <=> D-Sorbitol + Orthophosphate
R02867	C00081 + C00794 <=> C00104 + C01096	ITP + D-Sorbitol <=> IDP + Sorbitol 6-phosphate
R02868	C00131 + C00794 <=> C00206 + C01096	dATP + D-Sorbitol <=> dADP + Sorbitol 6-phosphate
R02869	C01137 + C00315 <=> C00170 + C00750	S-Adenosylmethioninamine + Spermidine <=> 5'-Methylthioadenosine + Spermine
R02872	C03428 + C00005 + C00080 <=> C00013 + C00751 + C00006	Presqualene diphosphate + NADPH + H+ <=> Diphosphate + Squalene + NADP+
R02875	C00751 + C00001 <=> C06083	Squalene + H2O <=> Tetrahymanol
R02877	C06317 + C00007 <=> C00755 + C00027	Vanillyl alcohol + Oxygen <=> 4-Hydroxy-3-methoxy-benzaldehyde + Hydrogen peroxide
R02878	C00756 + C00003 <=> C01545 + C00004 + C00080	1-Octanol + NAD+ <=> 1-Octanal + NADH + H+
R02880	C03329 + 2 C00007 + C00080 <=> C00757 + 2 C00027	(S)-Canadine + 2 Oxygen + H+ <=> Berberine + 2 Hydrogen peroxide
R02882	C00019 + C00758 <=> C00021 + C01557	S-Adenosyl-L-methionine + Bergaptol <=> S-Adenosyl-L-homocysteine + Bergapten
R02892	C03588 + C00006 <=> C00762 + C00005 + C00080	4,5alpha-Dihydrocortisone + NADP+ <=> Cortisone + NADPH + H+
R02893	C05469 + C00006 <=> C00762 + C00005 + C00080	17alpha,21-Dihydroxy-5beta-prege-3,11,20-trione + NADP+ <=> Cortisone + NADPH + H+
R02894	C00763 + C00007 <=> C03564 + C00027	D-Proline + Oxygen <=> 1-Pyrroline-2-carboxylate + Hydrogen peroxide
R02895	C00763 + C00064 <=> C05939	D-Proline + L-Glutamine <=> Linatine
R02896	C01489 + C00003 <=> C00764 + C00004 + C00080	D-Iditol + NAD+ <=> D-Sorbose + NADH + H+
R02897	C00029 + C00509 <=> C00015 + C09099	UDP-glucose + Naringenin <=> UDP + Naringenin 7-O-beta-D-glucoside
R02898	C00766 <=> C09321	Flavanone <=> 2'-Hydroxychalcone
R02901	C00774 + C00001 <=> C01744 + C02183	Phloretin + H2O <=> Phloretate + Phloroglucinol
R02902	C00777 + C00167 <=> C11061 + C00015	Retinoate + UDP-glucuronate <=> all-trans-Retinoyl-beta-glucuronide + UDP
R02906	C00779 + C00006 <=> C04033 + C00005 + C00080	Scytalone + NADP+ <=> 1,3,6,8-Naphthalenetetrol + NADPH + H+
R02907	C00779 <=> C01173 + C00001	Scytalone <=> 1,3,8-Naphthalenertriol + H2O
R02908	C00780 + C00001 + C00007 <=> C05634 + C00014 + C00027	Serotonin + H2O + Oxygen <=> 5-Hydroxyindoleacetaldehyde + Ammonia + Hydrogen peroxide
R02909	C00780 + C00007 <=> C05647	Serotonin + Oxygen <=> Formyl-5-hydroxykynurenamine
R02910	C00019 + C00780 <=> C00021 + C06212	S-Adenosyl-L-methionine + Serotonin <=> S-Adenosyl-L-homocysteine + N-Methylserotonin
R02911	C00024 + C00780 <=> C00010 + C00978	Acetyl-CoA + Serotonin <=> CoA + N-Acetylserotonin
R02912	C00780 + C00440 <=> C05659 + C00101	Serotonin + 5-Methyltetrahydrofolate <=> 5-Methoxytryptamine + Tetrahydrofolate
R02914	C03680 <=> C00785 + C00001	4-Imidazolone-5-propanoate <=> Urocanate + H2O
R02915	C10503 + C00006 + C00001 <=> C00786 + C00005 + C00080	Medicarpin + NADP+ + H2O <=> (-)-Vestitone + NADPH + H+
R02919	C00788 + C00001 + C00007 <=> C05577 + C00218 + C00027	L-Adrenaline + H2O + Oxygen <=> 3,4-Dihydroxymandelaldehyde + Methylamine + Hydrogen peroxide
R02920	C00019 + C00788 <=> C00021 + C05588	S-Adenosyl-L-methionine + L-Adrenaline <=> S-Adenosyl-L-homocysteine + L-Metanephrine
R02921	C00063 + C01068 <=> C00013 + C00789	CTP + D-Ribitol 5-phosphate <=> Diphosphate + CDP-ribitol
R02922	C00791 + C00001 <=> C02565 + C00014	Creatinine + H2O <=> N-Methylhydantoin + Ammonia
R02923	C00792 + C00001 + C00007 <=> C03771 + C00014 + C00027	D-Arginine + H2O + Oxygen <=> 5-Guanidino-2-oxopentanoate + Ammonia + Hydrogen peroxide
R02925	C00794 + C00016 <=> C01352 + C00247	D-Sorbitol + FAD <=> FADH2 + L-Sorbose
R02926	C05399 + C00001 <=> C00794 + C00124	Melibiitol + H2O <=> D-Sorbitol + D-Galactose
R02927	C00002 + C00795 <=> C00008 + C01097	ATP + D-Tagatose <=> ADP + D-Tagatose 6-phosphate
R02928	C01697 + C00003 <=> C00795 + C00004 + C00080	Galactitol + NAD+ <=> D-Tagatose + NADH + H+
R02929	C00002 + C00025 + C00797 <=> C00008 + C00009 + C01047	ATP + L-Glutamate + Ethylamine <=> ADP + Orthophosphate + N5-Ethyl-L-glutamine
R02930	C01047 + C00001 <=> C00025 + C00797	N5-Ethyl-L-glutamine + H2O <=> L-Glutamate + Ethylamine
R02931	C00019 + C06563 <=> C00021 + C00814	S-Adenosyl-L-methionine + Genistein <=> S-Adenosyl-L-homocysteine + Biochanin A
R02932	C00029 + C06563 <=> C00015 + C09126	UDP-glucose + Genistein <=> UDP + Genistein 7-O-beta-D-glucoside
R02933	C01040 + C00001 <=> C00800	L-Gulono-1,4-lactone + H2O <=> L-Gulonate
R02935	C00603 + C00003 <=> C00802 + C00004 + C00080	(S)-Ureidoglycolate + NAD+ <=> Oxalureate + NADH + H+
R02936	C00603 + C00006 <=> C00802 + C00005 + C00080	(S)-Ureidoglycolate + NADP+ <=> Oxalureate + NADPH + H+
R02937	C00169 + C01444 <=> C00009 + C00802	Carbamoyl phosphate + Oxamate <=> Orthophosphate + Oxalureate
R02938	C01842 + C00001 <=> C00803 + C00014	Pentanamide + H2O <=> Pentanoate + Ammonia
R02940	C05985 + C00003 + C00001 <=> C00804 + C00004 + C00080	2-Propynal + NAD+ + H2O <=> Propynoate + NADH + H+
R02941	C06202 + C00003 + C00001 <=> C00805 + C00004 + C00080	Salicylaldehyde + NAD+ + H2O <=> Salicylate + NADH + H+
R02942	C01405 + C00001 <=> C00805 + C00033	Aspirin + H2O <=> Salicylate + Acetate
R02943	C00806 + C00235 <=> C06067 + C00013	Tryptophan + Dimethylallyl diphosphate <=> Dimethylallyltryptophan + Diphosphate
R02944	C01765 + C00003 <=> C00808 + C00004 + C00080	(+)-Borneol + NAD+ <=> (+)-Camphor + NADH + H+
R02945	C01766 + C00003 <=> C00809 + C00004 + C00080	(-)-Borneol + NAD+ <=> (-)-Camphor + NADH + H+
R02946	C03044 + C00003 <=> C00810 + C00004 + C00080	(R,R)-Butane-2,3-diol + NAD+ <=> (R)-Acetoin + NADH + H+
R02948	C06010 <=> C00810 + C00011	(S)-2-Acetolactate <=> (R)-Acetoin + CO2
R02949	C00810 <=> C01769	(R)-Acetoin <=> (S)-Acetoin
R02951	C00029 + C00811 <=> C00015 + C04415	UDP-glucose + 4-Coumarate <=> UDP + 4-O-beta-D-Glucosyl-4-hydroxycinnamate
R02952	C00811 <=> C05627 + C00011	4-Coumarate <=> 4-Hydroxystyrene + CO2
R02954	C02675 + C00006 <=> C00814 + C00005 + C00080	Dihydrobiochanin A + NADP+ <=> Biochanin A + NADPH + H+
R02955	C00024 + C00815 <=> C00033 + C01011	Acetyl-CoA + Citramalate <=> Acetate + (3S)-Citramalyl-CoA
R02957	C02670 + C00003 + 2 C00001 <=> C00818 + C00004 + C00080	D-Glucuronolactone + NAD+ + 2 H2O <=> D-Glucarate + NADH + H+
R02962	C00822 <=> C05604	Dopaquinone <=> 2-Carboxy-2,3-dihydro-5,6-dihydroxyindole
R02963	C00827 <=> C00894 + C00001	Lactoyl-CoA <=> Propenoyl-CoA + H2O
R02968	C00829 + C00007 + C00004 + C00080 <=> C04314 + C00003	Naphthalene + Oxygen + NADH + H+ <=> cis-1,2-Dihydronaphthalene-1,2-diol + NAD+
R02969	C02287 + C00003 <=> C00830 + C00004 + C00080	Hydroxymalonate + NAD+ <=> Oxomalonate + NADH + H+
R02970	C00022 + C00872 <=> C00041 + C00830	Pyruvate + Aminomalonate <=> L-Alanine + Oxomalonate
R02971	C00002 + C00831 <=> C00008 + C01134	ATP + Pantetheine <=> ADP + Pantetheine 4'-phosphate
R02972	C04079 <=> C00831 + C00011	N-((R)-Pantothenoyl)-L-cysteine <=> Pantetheine + CO2
R02973	C00831 + C00001 <=> C00864 + C01678	Pantetheine + H2O <=> Pantothenate + Cysteamine
R02974	C00835 + C00001 <=> C02333 + C00014	Sepiapterin + H2O <=> Xanthopterin-B2 + Ammonia
R02975	C02953 + C00006 <=> C00835 + C00005 + C00080	7,8-Dihydrobiopterin + NADP+ <=> Sepiapterin + NADPH + H+
R02976	C00002 + C00836 <=> C00008 + C01120	ATP + Sphinganine <=> ADP + Sphinganine 1-phosphate
R02978	C00836 + C00006 <=> C02934 + C00005 + C00080	Sphinganine + NADP+ <=> 3-Dehydrosphinganine + NADPH + H+
R02979	C00836 + C00016 <=> C01352 + C00319	Sphinganine + FAD <=> FADH2 + Sphingosine
R02982	C00019 + C00841 <=> C00021 + C01864	S-Adenosyl-L-methionine + Xanthotoxol <=> S-Adenosyl-L-homocysteine + Xanthotoxin
R02983	C00842 + 2 C00006 + C00001 <=> C06017 + 2 C00005 + 2 C00080	dTDP-glucose + 2 NADP+ + H2O <=> dTDP-D-glucuronate + 2 NADPH + 2 H+
R02984	C00842 <=> C02097	dTDP-glucose <=> dTDP-galactose
R02985	C00844 + C00031 <=> C08325 + C00001	Prunasin + D-Glucose <=> Amygdalin + H2O
R02986	C00002 + C01546 + C00010 <=> C00020 + C00013 + C00845	ATP + 2-Furoate + CoA <=> AMP + Diphosphate + 2-Furoyl-CoA
R02988	C00846 + C00003 <=> C02222 + C00004 + C00080	3-Oxoadipate + NAD+ <=> 2-Maleylacetate + NADH + H+
R02989	C00846 + C00006 <=> C02222 + C00005 + C00080	3-Oxoadipate + NADP+ <=> 2-Maleylacetate + NADPH + H+
R02990	C00091 + C00846 <=> C00042 + C02232	Succinyl-CoA + 3-Oxoadipate <=> Succinate + 3-Oxoadipyl-CoA
R02991	C03586 + C00001 <=> C00846	2-Oxo-2,3-dihydrofuran-5-acetate + H2O <=> 3-Oxoadipate
R02992	C00971 + C00001 <=> C00847	4-Pyridoxolactone + H2O <=> 4-Pyridoxate
R02993	C00847 + C00003 <=> C06050 + C00004 + C00080	4-Pyridoxate + NAD+ <=> 2-Methyl-3-hydroxy-5-formylpyridine-4-carboxylate + NADH + H+
R02994	C03092 + C00003 <=> C00848 + C00004 + C00080	6-endo-Hydroxycineole + NAD+ <=> 6-Oxocineole + NADH + H+
R02995	C00848 + C00007 + C00005 + C00080 <=> C04718 + C00006 + C00001	6-Oxocineole + Oxygen + NADPH + H+ <=> 1,6,6-Trimethyl-2,7-dioxabicyclo[3.2.2]no-3-one + NADP+ + H2O
R02997	C00852 + C00001 <=> C01197 + C00296	Chlorogenate + H2O <=> Caffeate + Quinate
R02998	C00852 + C00818 <=> C00296 + C03062	Chlorogenate + D-Glucarate <=> Quinate + 2-O-Caffeoylglucarate
R02999	C00177 + C00853 + C00006 <=> C02823 + C00005	Cyanide ion + Cob(I)alamin + NADP+ <=> Cyanocobalamin + NADPH
R03001	C00855 + C00022 <=> C01180 + C00041	D-Methionine + Pyruvate <=> 4-Methylthio-2-oxobutanoic acid + L-Alanine
R03004	C00857 + C00001 <=> C00020 + C01185	Deamino-NAD+ + H2O <=> AMP + Nicotinate D-ribonucleotide
R03005	C00002 + C01185 <=> C00013 + C00857	ATP + Nicotinate D-ribonucleotide <=> Diphosphate + Deamino-NAD+
R03006	C00858 + C00007 + C00005 + C00080 <=> C01562 + C00006 + C00001	Formononetin + Oxygen + NADPH + H+ <=> Calycosin + NADP+ + H2O
R03008	C00859 + C00026 + C00007 <=> C03579 + C00042 + C00011	Gibberellin A1 + 2-Oxoglutarate + Oxygen <=> Gibberellin A8 + Succinate + CO2
R03009	C02035 + C00026 + C00007 <=> C00859 + C00042 + C00011	Gibberellin A20 + 2-Oxoglutarate + Oxygen <=> Gibberellin A1 + Succinate + CO2
R03012	C00860 + C00003 <=> C01929 + C00004 + C00080	L-Histidinol + NAD+ <=> L-Histidinal + NADH + H+
R03013	C01100 + C00001 <=> C00860 + C00009	L-Histidinol phosphate + H2O <=> L-Histidinol + Orthophosphate
R03014	C00002 + C00861 <=> C00008 + C01131	ATP + L-Rhamnulose <=> ADP + L-Rhamnulose 1-phosphate
R03018	C00002 + C00864 <=> C00008 + C03492	ATP + Pantothenate <=> ADP + D-4'-Phosphopantothenate
R03021	C03042 + C00003 <=> C00869 + C00004 + C00080	(R)-2-Hydroxystearate + NAD+ <=> 2-Oxooctadecanoic acid + NADH + H+
R03022	C03045 + C00003 <=> C00869 + C00004 + C00080	(S)-2-Hydroxystearate + NAD+ <=> 2-Oxooctadecanoic acid + NADH + H+
R03023	C00870 + C00007 + C00004 + C00080 <=> C02235 + C00003 + C00001	4-Nitrophenol + Oxygen + NADH + H+ <=> 4-Nitrocatechol + NAD+ + H2O
R03024	C03360 + C00001 <=> C00870 + C00009	4-Nitrophenyl phosphate + H2O <=> 4-Nitrophenol + Orthophosphate
R03025	C00876 + C00282 <=> C01080	Coenzyme F420 + Hydrogen <=> Reduced coenzyme F420
R03026	C01144 <=> C00877 + C00001	(S)-3-Hydroxybutanoyl-CoA <=> Crotonoyl-CoA + H2O
R03027	C03561 <=> C00877 + C00001	(R)-3-Hydroxybutanoyl-CoA <=> Crotonoyl-CoA + H2O
R03028	C02411 <=> C00877 + C00011	Glutaconyl-1-CoA <=> Crotonoyl-CoA + CO2
R03030	C05231 <=> C00877 + C00014	L-3-Aminobutyryl-CoA <=> Crotonoyl-CoA + Ammonia
R03031	C02331 <=> C00877	Vinylacetyl-CoA <=> Crotonoyl-CoA
R03032	C00878 <=> C03826 + C00001	D-Arabinonate <=> 2-Dehydro-3-deoxy-D-xylonate + H2O
R03033	C00880 <=> C01216 + C00001	D-Galactonate <=> 2-Dehydro-3-deoxy-D-galactonate + H2O
R03034	C03383 + C00001 <=> C00880	D-Galactono-1,4-lactone + H2O <=> D-Galactonate
R03035	C00002 + C01134 <=> C00013 + C00882	ATP + Pantetheine 4'-phosphate <=> Diphosphate + Dephospho-CoA
R03036	C00882 + C00001 <=> C01134 + C00020	Dephospho-CoA + H2O <=> Pantetheine 4'-phosphate + AMP
R03037	C00885 + C00001 <=> C04171 + C00022	Isochorismate + H2O <=> (2S,3S)-2,3-Dihydro-2,3-dihydroxybenzoate + Pyruvate
R03040	C02123 + C00010 <=> C00888 + C00001 + C00048	3-Propylmalate + CoA <=> Pentanoyl-CoA + H2O + Glyoxylate
R03043	C00892 + C00003 <=> C00891 + C00004 + C00080	Preg-21-ol + NAD+ <=> Preg-21-al + NADH + H+
R03044	C00891 + C00005 + C00080 <=> C00892 + C00006	Preg-21-al + NADPH + H+ <=> Preg-21-ol + NADP+
R03045	C05668 <=> C00894 + C00001	3-Hydroxypropionyl-CoA <=> Propenoyl-CoA + H2O
R03046	C02335 <=> C00894 + C00014	beta-Alanyl-CoA <=> Propenoyl-CoA + Ammonia
R03048	C00899 + C00003 <=> C02110 + C00004 + C00080	11-cis-Retinol + NAD+ <=> 11-cis-Retinal + NADH + H+
R03049	C03455 + C00001 <=> C00899 + C00249	11-cis-Retinyl palmitate + H2O <=> 11-cis-Retinol + Hexadecanoic acid
[truncated: 5,378 more rows]
