# Supplementary material for: Plausibility of Early Life in a Relatively Wide Temperature Range: Clues from Simulated Metabolic Network Expansion
Source: Life (Basel). 2021 Jul 24;11(8):738. doi: 10.3390/life11080738 (PMC8398716; doi:10.3390/life11080738)
Supplement: Supplementary file 1 [file life-11-00738-s001.zip › Table S2.xlsx]

## Sheet: Sheet1
Table S2 Gibbs free energy of the reactions at different temperatures
Reaction*	-25 ℃	0 ℃	25 ℃	50 ℃	75 ℃	100 ℃	125 ℃	150 ℃
R00004_F	-66.0956	-71.3601	-76.6246	-81.8891	-87.1536	-92.4182	-97.6827	-102.947		*The free energy of both sides of the KEGG reactions is calculated. "F" means forward and "R" means reverse. For all reactions, we assumed that reactant concentration of 0.1 M, product concentration of 1E-6 M, and water concentration of 1 M. The unit of free energy is kJ/mol.
R00004_R	-5.16203	-7.0764	-8.99077	-10.9051	-12.8195	-14.7339	-16.6482	-18.5626
R00005_F	-192.262	-203.269	-214.277	-225.285	-236.292	-247.3	-258.307	-269.315
R00005_R	73.499	72.5418	71.5846	70.6274	69.6702	68.7131	67.7559	66.7987
R00006_F	-40.5051	-45.291	-50.0769	-54.8628	-59.6488	-64.4347	-69.2206	-74.0065
R00006_R	-54.5051	-59.291	-64.0769	-68.8628	-73.6488	-78.4347	-83.2206	-88.0065
R00008_F	-61.3556	-66.6201	-71.8846	-77.1491	-82.4136	-87.6782	-92.9427	-98.2072
R00008_R	-9.90203	-11.8164	-13.7308	-15.6451	-17.5595	-19.4739	-21.3882	-23.3026
R00009_F	-211.002	-212.916	-214.831	-216.745	-218.66	-220.574	-222.488	-224.403
R00009_R	139.744	134.48	129.215	123.951	118.686	113.422	108.157	102.893
R00010_F	-63.7556	-69.0201	-74.2846	-79.5491	-84.8136	-90.0782	-95.3427	-100.607
R00010_R	-7.50203	-9.4164	-11.3308	-13.2451	-15.1595	-17.0739	-18.9882	-20.9026
R00013_F	-65.5051	-70.291	-75.0769	-79.8628	-84.6488	-89.4347	-94.2206	-99.0065
R00013_R	-29.5051	-34.291	-39.0769	-43.8628	-48.6488	-53.4347	-58.2206	-63.0065
R00014_F	-65.7051	-70.491	-75.2769	-80.0628	-84.8488	-89.6347	-94.4206	-99.2065
R00014_R	-29.3051	-34.091	-38.8769	-43.6628	-48.4488	-53.2347	-58.0206	-62.8065
R00015_F	-53.5051	-58.291	-63.0769	-67.8628	-72.6488	-77.4347	-82.2206	-87.0065
R00015_R	-41.5051	-46.291	-51.0769	-55.8628	-60.6488	-65.4347	-70.2206	-75.0065
R00018_F	-52.5051	-57.291	-62.0769	-66.8628	-71.6488	-76.4347	-81.2206	-86.0065
R00018_R	-42.5051	-47.291	-52.0769	-56.8628	-61.6488	-66.4347	-71.2206	-76.0065
R00022_F	-65.2556	-70.5201	-75.7846	-81.0491	-86.3136	-91.5782	-96.8427	-102.107
R00022_R	-6.00203	-7.9164	-9.83077	-11.7451	-13.6595	-15.5739	-17.4882	-19.4026
R00024_F	-79.5051	-84.291	-89.0769	-93.8628	-98.6488	-103.435	-108.221	-113.007
R00024_R	-15.5051	-20.291	-25.0769	-29.8628	-34.6488	-39.4347	-44.2206	-49.0065
R00026_F	-61.7556	-67.0201	-72.2846	-77.5491	-82.8136	-88.0782	-93.3427	-98.6072
R00026_R	-9.50203	-11.4164	-13.3308	-15.2451	-17.1595	-19.0739	-20.9882	-22.9026
R00027_F	-40.1556	-45.4201	-50.6846	-55.9491	-61.2136	-66.4782	-71.7427	-77.0072
R00027_R	-31.102	-33.0164	-34.9308	-36.8451	-38.7595	-40.6739	-42.5882	-44.5026
R00028_F	-66.4556	-71.7201	-76.9846	-82.2491	-87.5136	-92.7782	-98.0427	-103.307
R00028_R	-4.80203	-6.7164	-8.63077	-10.5451	-12.4595	-14.3739	-16.2882	-18.2026
R00031_F	-567.755	-572.062	-576.369	-580.677	-584.984	-589.291	-593.599	-597.906
R00031_R	448.992	441.334	433.677	426.019	418.362	410.704	403.047	395.39
R00032_F	-407.505	-412.291	-417.077	-421.863	-426.649	-431.435	-436.221	-441.007
R00032_R	312.495	307.709	302.923	298.137	293.351	288.565	283.779	278.993
R00033_F	-159.505	-164.291	-169.077	-173.863	-178.649	-183.435	-188.221	-193.007
R00033_R	64.4949	59.709	54.9231	50.1372	45.3512	40.5653	35.7794	30.9935
R00036_F	-121.002	-122.916	-124.831	-126.745	-128.66	-130.574	-132.488	-134.403
R00036_R	49.7444	44.4799	39.2154	33.9509	28.6864	23.4218	18.1573	12.8928
R00038_F	-31.302	-33.2164	-35.1308	-37.0451	-38.9595	-40.8739	-42.7882	-44.7026
R00038_R	-39.9556	-45.2201	-50.4846	-55.7491	-61.0136	-66.2782	-71.5427	-76.8072
R00039_F	-47.2051	-51.991	-56.7769	-61.5628	-66.3488	-71.1347	-75.9206	-80.7065
R00039_R	-47.8051	-52.591	-57.3769	-62.1628	-66.9488	-71.7347	-76.5206	-81.3065
R00042_F	-763.761	-773.811	-783.862	-793.912	-803.962	-814.013	-824.063	-834.114
R00042_R	597.493	590.793	584.092	577.392	570.692	563.991	557.291	550.591
R00043_F	-414.205	-418.991	-423.777	-428.563	-433.349	-438.135	-442.921	-447.707
R00043_R	319.195	314.409	309.623	304.837	300.051	295.265	290.479	285.693
R00044_F	-539.755	-544.062	-548.369	-552.677	-556.984	-561.291	-565.599	-569.906
R00044_R	420.992	413.334	405.677	398.019	390.362	382.704	375.047	367.39
R00045_F	-386.755	-391.062	-395.369	-399.677	-403.984	-408.291	-412.599	-416.906
R00045_R	267.992	260.334	252.677	245.019	237.362	229.704	222.047	214.39
R00048_F	-114.256	-119.52	-124.785	-130.049	-135.314	-140.578	-145.843	-151.107
R00048_R	42.998	41.0836	39.1692	37.2549	35.3405	33.4261	31.5118	29.5974
R00049_F	-58.4051	-63.191	-67.9769	-72.7628	-77.5488	-82.3347	-87.1206	-91.9065
R00049_R	-36.6051	-41.391	-46.1769	-50.9628	-55.7488	-60.5347	-65.3206	-70.1065
R00053_F	-123.856	-129.12	-134.385	-139.649	-144.914	-150.178	-155.443	-160.707
R00053_R	52.598	50.6836	48.7692	46.8549	44.9405	43.0261	41.1118	39.1974
R00054_F	-111.856	-117.12	-122.385	-127.649	-132.914	-138.178	-143.443	-148.707
R00054_R	40.598	38.6836	36.7692	34.8549	32.9405	31.0261	29.1118	27.1974
R00055_F	-466.755	-471.062	-475.369	-479.677	-483.984	-488.291	-492.599	-496.906
R00055_R	347.992	340.334	332.677	325.019	317.362	309.704	302.047	294.39
R00058_F	-341.755	-346.062	-350.369	-354.677	-358.984	-363.291	-367.599	-371.906
R00058_R	222.992	215.334	207.677	200.019	192.362	184.704	177.047	169.39
R00059_F	-47.4556	-52.7201	-57.9846	-63.2491	-68.5136	-73.7782	-79.0427	-84.3072
R00059_R	-23.802	-25.7164	-27.6308	-29.5451	-31.4595	-33.3739	-35.2882	-37.2026
R00062_F	-47.4965	-52.2824	-57.0683	-61.8542	-66.6402	-71.4261	-76.212	-80.9979
R00062_R	-47.5137	-52.2996	-57.0855	-61.8714	-66.6574	-71.4433	-76.2292	-81.0151
R00063_F	-52.5051	-57.291	-62.0769	-66.8628	-71.6488	-76.4347	-81.2206	-86.0065
R00063_R	-42.5051	-47.291	-52.0769	-56.8628	-61.6488	-66.4347	-71.2206	-76.0065
R00066_F	-147.505	-152.291	-157.077	-161.863	-166.649	-171.435	-176.221	-181.007
R00066_R	52.4949	47.709	42.9231	38.1372	33.3512	28.5653	23.7794	18.9935
R00069_F	110.495	105.709	100.923	96.1372	91.3512	86.5653	81.7794	76.9935
R00069_R	-205.505	-210.291	-215.077	-219.863	-224.649	-229.435	-234.221	-239.007
R00070_F	-534.755	-539.062	-543.369	-547.677	-551.984	-556.291	-560.599	-564.906
R00070_R	415.992	408.334	400.677	393.019	385.362	377.704	370.047	362.39
R00072_F	-216.505	-221.291	-226.077	-230.863	-235.649	-240.435	-245.221	-250.007
R00072_R	121.495	116.709	111.923	107.137	102.351	97.5653	92.7794	87.9935
R00078_F	-136.26	-145.353	-154.446	-163.539	-172.633	-181.726	-190.819	-199.912
R00078_R	-77.5132	-89.9566	-102.4	-114.843	-127.287	-139.73	-152.174	-164.617
R00084_F	-244.513	-256.957	-269.4	-281.843	-294.287	-306.73	-319.174	-331.617
R00084_R	30.7404	21.6471	12.5539	3.4606	-5.63265	-14.7259	-23.8192	-32.9124
R00085_F	-143.759	-151.895	-160.031	-168.167	-176.303	-184.439	-192.575	-200.711
R00085_R	48.7485	47.3127	45.8769	44.4411	43.0054	41.5696	40.1338	38.698
R00086_F	-87.9656	-93.2301	-98.4946	-103.759	-109.024	-114.288	-119.553	-124.817
R00086_R	16.708	14.7936	12.8792	10.9649	9.05049	7.13612	5.22176	3.30739
R00087_F	-101.456	-106.72	-111.985	-117.249	-122.514	-127.778	-133.043	-138.307
R00087_R	30.198	28.2836	26.3692	24.4549	22.5405	20.6261	18.7118	16.7974
R00088_F	-96.9556	-102.22	-107.485	-112.749	-118.014	-123.278	-128.543	-133.807
R00088_R	25.698	23.7836	21.8692	19.9549	18.0405	16.1261	14.2118	12.2974
R00089_F	-50.4556	-55.7201	-60.9846	-66.2491	-71.5136	-76.7782	-82.0427	-87.3072
R00089_R	-20.802	-22.7164	-24.6308	-26.5451	-28.4595	-30.3739	-32.2882	-34.2026
R00090_F	-351.902	-353.816	-355.731	-357.645	-359.56	-361.474	-363.388	-365.303
R00090_R	280.644	275.38	270.115	264.851	259.586	254.322	249.057	243.793
R00091_F	-16.4546	-20.7619	-25.0692	-29.3766	-33.6839	-37.9912	-42.2986	-46.6059
R00091_R	-102.308	-109.966	-117.623	-125.281	-132.938	-140.596	-148.253	-155.91
R00092_F	142.742	135.564	128.385	121.206	114.027	106.848	99.6691	92.4902
R00092_R	-285.258	-292.436	-299.615	-306.794	-313.973	-321.152	-328.331	-335.51
R00093_F	-14.6576	-21.8365	-29.0154	-36.1943	-43.3731	-50.552	-57.7309	-64.9098
R00093_R	-127.858	-135.036	-142.215	-149.394	-156.573	-163.752	-170.931	-178.11
R00094_F	-24.3546	-28.6619	-32.9692	-37.2766	-41.5839	-45.8912	-50.1986	-54.5059
R00094_R	-94.4081	-102.066	-109.723	-117.381	-125.038	-132.696	-140.353	-148.01
R00102_F	-79.0556	-84.3201	-89.5846	-94.8491	-100.114	-105.378	-110.643	-115.907
R00102_R	7.79797	5.8836	3.96923	2.05486	0.140494	-1.77388	-3.68824	-5.60261
R00103_F	-92.4556	-97.7201	-102.985	-108.249	-113.514	-118.778	-124.043	-129.307
R00103_R	21.198	19.2836	17.3692	15.4549	13.5405	11.6261	9.71176	7.79739
R00104_F	-54.6051	-59.391	-64.1769	-68.9628	-73.7488	-78.5347	-83.3206	-88.1065
R00104_R	-40.4051	-45.191	-49.9769	-54.7628	-59.5488	-64.3347	-69.1206	-73.9065
R00105_F	-64.2051	-68.991	-73.7769	-78.5628	-83.3488	-88.1347	-92.9206	-97.7065
R00105_R	-30.8051	-35.591	-40.3769	-45.1628	-49.9488	-54.7347	-59.5206	-64.3065
R00112_F	-37.9151	-42.701	-47.4869	-52.2728	-57.0588	-61.8447	-66.6306	-71.4165
R00112_R	-57.0951	-61.881	-66.6669	-71.4528	-76.2388	-81.0247	-85.8106	-90.5965
R00113_F	-342.302	-344.216	-346.131	-348.045	-349.96	-351.874	-353.788	-355.703
R00113_R	271.044	265.78	260.515	255.251	249.986	244.722	239.457	234.193
R00114_F	-24.2576	-31.4365	-38.6154	-45.7943	-52.9731	-60.152	-67.3309	-74.5098
R00114_R	-118.258	-125.436	-132.615	-139.794	-146.973	-154.152	-161.331	-168.51
R00115_F	-33.9546	-38.2619	-42.5692	-46.8766	-51.1839	-55.4912	-59.7986	-64.1059
R00115_R	-84.8081	-92.4656	-100.123	-107.781	-115.438	-123.096	-130.753	-138.41
R00118_F	-80.8556	-86.1201	-91.3846	-96.6491	-101.914	-107.178	-112.443	-117.707
R00118_R	9.59797	7.6836	5.76923	3.85486	1.94049	0.0261246	-1.88824	-3.80261
R00119_F	-43.2051	-47.991	-52.7769	-57.5628	-62.3488	-67.1347	-71.9206	-76.7065
R00119_R	-51.8051	-56.591	-61.3769	-66.1628	-70.9488	-75.7347	-80.5206	-85.3065
R00120_F	-165.755	-170.062	-174.369	-178.677	-182.984	-187.291	-191.599	-195.906
R00120_R	46.9919	39.3344	31.6769	24.0195	16.362	8.7045	1.04702	-6.61046
R00122_F	-79.5456	-84.8101	-90.0746	-95.3391	-100.604	-105.868	-111.133	-116.397
R00122_R	8.28797	6.3736	4.45923	2.54486	0.630494	-1.28388	-3.19824	-5.11261
R00123_F	-100.256	-105.52	-110.785	-116.049	-121.314	-126.578	-131.843	-137.107
R00123_R	28.998	27.0836	25.1692	23.2549	21.3405	19.4261	17.5118	15.5974
R00125_F	-139.256	-144.52	-149.785	-155.049	-160.314	-165.578	-170.843	-176.107
R00125_R	67.998	66.0836	64.1692	62.2549	60.3405	58.4261	56.5118	54.5974
R00126_F	4.49493	-0.290996	-5.07692	-9.86284	-14.6488	-19.4347	-24.2206	-29.0065
R00126_R	-99.5051	-104.291	-109.077	-113.863	-118.649	-123.435	-128.221	-133.007
R00127_F	-55.9251	-60.711	-65.4969	-70.2828	-75.0688	-79.8547	-84.6406	-89.4265
R00127_R	-39.0851	-43.871	-48.6569	-53.4428	-58.2288	-63.0147	-67.8006	-72.5865
R00128_F	-112.856	-118.12	-123.385	-128.649	-133.914	-139.178	-144.443	-149.707
R00128_R	41.598	39.6836	37.7692	35.8549	33.9405	32.0261	30.1118	28.1974
R00129_F	-139.008	-146.666	-154.323	-161.981	-169.638	-177.296	-184.953	-192.61
R00129_R	20.2454	15.9381	11.6308	7.32344	3.01611	-1.29122	-5.59855	-9.90588
R00130_F	-46.0051	-50.791	-55.5769	-60.3628	-65.1488	-69.9347	-74.7206	-79.5065
R00130_R	-49.0051	-53.791	-58.5769	-63.3628	-68.1488	-72.9347	-77.7206	-82.5065
R00131_F	-108.759	-116.895	-125.031	-133.167	-141.303	-149.439	-157.575	-165.711
R00131_R	13.7485	12.3127	10.8769	9.44115	8.00537	6.56959	5.13382	3.69804
R00134_F	-59.2051	-63.991	-68.7769	-73.5628	-78.3488	-83.1347	-87.9206	-92.7065
R00134_R	-35.8051	-40.591	-45.3769	-50.1628	-54.9488	-59.7347	-64.5206	-69.3065
R00137_F	-56.4051	-61.191	-65.9769	-70.7628	-75.5488	-80.3347	-85.1206	-89.9065
R00137_R	-38.6051	-43.391	-48.1769	-52.9628	-57.7488	-62.5347	-67.3206	-72.1065
R00139_F	-35.6051	-40.391	-45.1769	-49.9628	-54.7488	-59.5347	-64.3206	-69.1065
R00139_R	-59.4051	-64.191	-68.9769	-73.7628	-78.5488	-83.3347	-88.1206	-92.9065
R00140_F	-56.7051	-61.491	-66.2769	-71.0628	-75.8488	-80.6347	-85.4206	-90.2065
R00140_R	-38.3051	-43.091	-47.8769	-52.6628	-57.4488	-62.2347	-67.0206	-71.8065
R00149_F	-101.01	-110.582	-120.154	-129.726	-139.298	-148.869	-158.441	-168.013
R00149_R	-89.0101	-98.582	-108.154	-117.726	-127.298	-136.869	-146.441	-156.013
R00150_F	-12.7546	-17.0619	-21.3692	-25.6766	-29.9839	-34.2912	-38.5986	-42.9059
R00150_R	-106.008	-113.666	-121.323	-128.981	-136.638	-144.296	-151.953	-159.61
R00155_F	-84.7556	-90.0201	-95.2846	-100.549	-105.814	-111.078	-116.343	-121.607
R00155_R	13.498	11.5836	9.66923	7.75486	5.84049	3.92612	2.01176	0.0973861
R00156_F	-37.3051	-42.091	-46.8769	-51.6628	-56.4488	-61.2347	-66.0206	-70.8065
R00156_R	-57.7051	-62.491	-67.2769	-72.0628	-76.8488	-81.6347	-86.4206	-91.2065
R00157_F	-66.1051	-70.891	-75.6769	-80.4628	-85.2488	-90.0347	-94.8206	-99.6065
R00157_R	-28.9051	-33.691	-38.4769	-43.2628	-48.0488	-52.8347	-57.6206	-62.4065
R00158_F	-50.7051	-55.491	-60.2769	-65.0628	-69.8488	-74.6347	-79.4206	-84.2065
R00158_R	-44.3051	-49.091	-53.8769	-58.6628	-63.4488	-68.2347	-73.0206	-77.8065
R00159_F	-98.1556	-103.42	-108.685	-113.949	-119.214	-124.478	-129.743	-135.007
R00159_R	26.898	24.9836	23.0692	21.1549	19.2405	17.3261	15.4118	13.4974
R00160_F	-92.2556	-97.5201	-102.785	-108.049	-113.314	-118.578	-123.843	-129.107
R00160_R	20.998	19.0836	17.1692	15.2549	13.3405	11.4261	9.51176	7.59739
R00161_F	-56.5051	-61.291	-66.0769	-70.8628	-75.6488	-80.4347	-85.2206	-90.0065
R00161_R	-38.5051	-43.291	-48.0769	-52.8628	-57.6488	-62.4347	-67.2206	-72.0065
R00173_F	-79.3556	-84.6201	-89.8846	-95.1491	-100.414	-105.678	-110.943	-116.207
R00173_R	8.09797	6.1836	4.26923	2.35486	0.440494	-1.47388	-3.38824	-5.30261
R00174_F	-56.1051	-60.891	-65.6769	-70.4628	-75.2488	-80.0347	-84.8206	-89.6065
R00174_R	-38.9051	-43.691	-48.4769	-53.2628	-58.0488	-62.8347	-67.6206	-72.4065
R00178_F	-74.3556	-79.6201	-84.8846	-90.1491	-95.4136	-100.678	-105.943	-111.207
R00178_R	3.09797	1.1836	-0.730768	-2.64514	-4.55951	-6.47388	-8.38824	-10.3026
R00181_F	-82.6556	-87.9201	-93.1846	-98.4491	-103.714	-108.978	-114.243	-119.507
R00181_R	11.398	9.4836	7.56923	5.65486	3.74049	1.82612	-0.0882446	-2.00261
R00182_F	-82.8556	-88.1201	-93.3846	-98.6491	-103.914	-109.178	-114.443	-119.707
R00182_R	11.598	9.6836	7.76923	5.85486	3.94049	2.02612	0.111755	-1.80261
R00183_F	-70.0556	-75.3201	-80.5846	-85.8491	-91.1136	-96.3782	-101.643	-106.907
R00183_R	-1.20203	-3.1164	-5.03077	-6.94514	-8.85951	-10.7739	-12.6882	-14.6026
R00184_F	-131.256	-136.52	-141.785	-147.049	-152.314	-157.578	-162.843	-168.107
R00184_R	59.998	58.0836	56.1692	54.2549	52.3405	50.4261	48.5118	46.5974
R00185_F	-65.4051	-70.191	-74.9769	-79.7628	-84.5488	-89.3347	-94.1206	-98.9065
R00185_R	-29.6051	-34.391	-39.1769	-43.9628	-48.7488	-53.5347	-58.3206	-63.1065
R00188_F	-66.9556	-72.2201	-77.4846	-82.7491	-88.0136	-93.2782	-98.5427	-103.807
R00188_R	-4.30203	-6.2164	-8.13077	-10.0451	-11.9595	-13.8739	-15.7882	-17.7026
R00189_F	-111.258	-118.436	-125.615	-132.794	-139.973	-147.152	-154.331	-161.51
R00189_R	-31.2576	-38.4365	-45.6154	-52.7943	-59.9731	-67.152	-74.3309	-81.5098
R00190_F	-27.5051	-32.291	-37.0769	-41.8628	-46.6488	-51.4347	-56.2206	-61.0065
R00190_R	-67.5051	-72.291	-77.0769	-81.8628	-86.6488	-91.4347	-96.2206	-101.007
R00191_F	-74.7525	-77.1455	-79.5385	-81.9314	-84.3244	-86.7173	-89.1103	-91.5033
R00191_R	27.2475	24.8545	22.4615	20.0686	17.6756	15.2827	12.8897	10.4967
R00192_F	-16.6556	-21.9201	-27.1846	-32.4491	-37.7136	-42.9782	-48.2427	-53.5072
R00192_R	-54.602	-56.5164	-58.4308	-60.3451	-62.2595	-64.1739	-66.0882	-68.0026
R00193_F	-74.2556	-79.5201	-84.7846	-90.0491	-95.3136	-100.578	-105.843	-111.107
R00193_R	2.99797	1.0836	-0.830768	-2.74514	-4.65951	-6.57388	-8.48824	-10.4026
R00194_F	-82.1556	-87.4201	-92.6846	-97.9491	-103.214	-108.478	-113.743	-119.007
R00194_R	10.898	8.9836	7.06923	5.15486	3.24049	1.32612	-0.588245	-2.50261
R00195_F	-89.7586	-97.8947	-106.031	-114.167	-122.303	-130.439	-138.575	-146.711
R00195_R	-5.25152	-6.6873	-8.12308	-9.55885	-10.9946	-12.4304	-13.8662	-15.302
R00199_F	-73.2081	-80.8656	-88.5231	-96.1805	-103.838	-111.496	-119.153	-126.81
R00199_R	-45.5546	-49.8619	-54.1692	-58.4766	-62.7839	-67.0912	-71.3986	-75.7059
R00200_F	-17.4051	-22.191	-26.9769	-31.7628	-36.5488	-41.3347	-46.1206	-50.9065
R00200_R	-77.6051	-82.391	-87.1769	-91.9628	-96.7488	-101.535	-106.321	-111.107
R00203_F	-80.9051	-85.691	-90.4769	-95.2628	-100.049	-104.835	-109.621	-114.407
R00203_R	-14.1051	-18.891	-23.6769	-28.4628	-33.2488	-38.0347	-42.8206	-47.6065
R00205_F	-90.5051	-95.291	-100.077	-104.863	-109.649	-114.435	-119.221	-124.007
R00205_R	-4.50507	-9.291	-14.0769	-18.8628	-23.6488	-28.4347	-33.2206	-38.0065
R00206_F	-54.5576	-61.7365	-68.9154	-76.0943	-83.2731	-90.452	-97.6309	-104.81
R00206_R	-87.9576	-95.1365	-102.315	-109.494	-116.673	-123.852	-131.031	-138.21
R00207_F	-213.258	-220.436	-227.615	-234.794	-241.973	-249.152	-256.331	-263.51
R00207_R	70.7424	63.5635	56.3846	49.2057	42.0269	34.848	27.6691	20.4902
R00208_F	-118.056	-123.32	-128.585	-133.849	-139.114	-144.378	-149.643	-154.907
R00208_R	46.798	44.8836	42.9692	41.0549	39.1405	37.2261	35.3118	33.3974
R00209_F	-89.9576	-97.1365	-104.315	-111.494	-118.673	-125.852	-133.031	-140.21
R00209_R	-52.5576	-59.7365	-66.9154	-74.0943	-81.2731	-88.452	-95.6309	-102.81
R00210_F	-99.5576	-106.736	-113.915	-121.094	-128.273	-135.452	-142.631	-149.81
R00210_R	-42.9576	-50.1365	-57.3154	-64.4943	-71.6731	-78.852	-86.0309	-93.2098
R00211_F	-231.258	-238.436	-245.615	-252.794	-259.973	-267.152	-274.331	-281.51
R00211_R	88.7424	81.5635	74.3846	67.2057	60.0269	52.848	45.6691	38.4902
R00212_F	-30.9051	-35.691	-40.4769	-45.2628	-50.0488	-54.8347	-59.6206	-64.4065
R00212_R	-64.1051	-68.891	-73.6769	-78.4628	-83.2488	-88.0347	-92.8206	-97.6065
R00214_F	-61.5081	-69.1656	-76.8231	-84.4805	-92.138	-99.7955	-107.453	-115.11
R00214_R	-57.2546	-61.5619	-65.8692	-70.1766	-74.4839	-78.7912	-83.0986	-87.4059
R00215_F	-53.0081	-60.6656	-68.3231	-75.9805	-83.638	-91.2955	-98.953	-106.61
R00215_R	-65.7546	-70.0619	-74.3692	-78.6766	-82.9839	-87.2912	-91.5986	-95.9059
R00216_F	-71.1081	-78.7656	-86.4231	-94.0805	-101.738	-109.396	-117.053	-124.71
R00216_R	-47.6546	-51.9619	-56.2692	-60.5766	-64.8839	-69.1912	-73.4986	-77.8059
R00217_F	-71.9556	-77.2201	-82.4846	-87.7491	-93.0136	-98.2782	-103.543	-108.807
R00217_R	0.697971	-1.2164	-3.13077	-5.04514	-6.95951	-8.87388	-10.7882	-12.7026
R00219_F	8.99797	7.0836	5.16923	3.25486	1.34049	-0.573875	-2.48824	-4.40261
R00219_R	-80.2556	-85.5201	-90.7846	-96.0491	-101.314	-106.578	-111.843	-117.107
R00220_F	-93.1556	-98.4201	-103.685	-108.949	-114.214	-119.478	-124.743	-130.007
R00220_R	21.898	19.9836	18.0692	16.1549	14.2405	12.3261	10.4118	8.49739
R00221_F	-91.7556	-97.0201	-102.285	-107.549	-112.814	-118.078	-123.343	-128.607
R00221_R	20.498	18.5836	16.6692	14.7549	12.8405	10.9261	9.01176	7.09739
R00223_F	-93.1556	-98.4201	-103.685	-108.949	-114.214	-119.478	-124.743	-130.007
R00223_R	21.898	19.9836	18.0692	16.1549	14.2405	12.3261	10.4118	8.49739
R00224_F	-57.6556	-62.9201	-68.1846	-73.4491	-78.7136	-83.9782	-89.2427	-94.5072
R00224_R	-13.602	-15.5164	-17.4308	-19.3451	-21.2595	-23.1739	-25.0882	-27.0026
R00226_F	-40.5051	-45.291	-50.0769	-54.8628	-59.6488	-64.4347	-69.2206	-74.0065
R00226_R	-54.5051	-59.291	-64.0769	-68.8628	-73.6488	-78.4347	-83.2206	-88.0065
R00227_F	-83.7556	-89.0201	-94.2846	-99.5491	-104.814	-110.078	-115.343	-120.607
R00227_R	12.498	10.5836	8.66923	6.75486	4.84049	2.92612	1.01176	-0.902614
R00228_F	-56.0546	-60.3619	-64.6692	-68.9766	-73.2839	-77.5912	-81.8986	-86.2059
R00228_R	-62.7081	-70.3656	-78.0231	-85.6805	-93.338	-100.996	-108.653	-116.31
R00229_F	-75.5576	-82.7365	-89.9154	-97.0943	-104.273	-111.452	-118.631	-125.81
R00229_R	-66.9576	-74.1365	-81.3154	-88.4943	-95.6731	-102.852	-110.031	-117.21
R00230_F	-29.4051	-34.191	-38.9769	-43.7628	-48.5488	-53.3347	-58.1206	-62.9065
R00230_R	-65.6051	-70.391	-75.1769	-79.9628	-84.7488	-89.5347	-94.3206	-99.1065
R00233_F	-66.2556	-71.5201	-76.7846	-82.0491	-87.3136	-92.5782	-97.8427	-103.107
R00233_R	-5.00203	-6.9164	-8.83077	-10.7451	-12.6595	-14.5739	-16.4882	-18.4026
R00235_F	-88.9576	-96.1365	-103.315	-110.494	-117.673	-124.852	-132.031	-139.21
R00235_R	-53.5576	-60.7365	-67.9154	-75.0943	-82.2731	-89.452	-96.6309	-103.81
R00237_F	-74.2556	-79.5201	-84.7846	-90.0491	-95.3136	-100.578	-105.843	-111.107
R00237_R	2.99797	1.0836	-0.830768	-2.74514	-4.65951	-6.57388	-8.48824	-10.4026
R00238_F	-19.4051	-24.191	-28.9769	-33.7628	-38.5488	-43.3347	-48.1206	-52.9065
R00238_R	-75.6051	-80.391	-85.1769	-89.9628	-94.7488	-99.5347	-104.321	-109.107
R00239_F	-10.9051	-15.691	-20.4769	-25.2628	-30.0488	-34.8347	-39.6206	-44.4065
R00239_R	-84.1051	-88.891	-93.6769	-98.4628	-103.249	-108.035	-112.821	-117.607
R00241_F	-13.1051	-17.891	-22.6769	-27.4628	-32.2488	-37.0347	-41.8206	-46.6065
R00241_R	-81.9051	-86.691	-91.4769	-96.2628	-101.049	-105.835	-110.621	-115.407
R00243_F	-35.6981	-43.3556	-51.0131	-58.6705	-66.328	-73.9855	-81.643	-89.3005
R00243_R	-83.0646	-87.3719	-91.6792	-95.9866	-100.294	-104.601	-108.909	-113.216
R00245_F	-86.4051	-91.191	-95.9769	-100.763	-105.549	-110.335	-115.121	-119.907
R00245_R	-8.60507	-13.391	-18.1769	-22.9628	-27.7488	-32.5347	-37.3206	-42.1065
R00248_F	-45.3081	-52.9656	-60.6231	-68.2805	-75.938	-83.5955	-91.253	-98.9105
R00248_R	-73.4546	-77.7619	-82.0692	-86.3766	-90.6839	-94.9912	-99.2986	-103.606
R00250_F	-177.008	-184.666	-192.323	-199.981	-207.638	-215.296	-222.953	-230.61
R00250_R	58.2454	53.9381	49.6308	45.3234	41.0161	36.7088	32.4014	28.0941
R00251_F	-91.7081	-99.3656	-107.023	-114.681	-122.338	-129.996	-137.653	-145.31
R00251_R	-27.0546	-31.3619	-35.6692	-39.9766	-44.2839	-48.5912	-52.8986	-57.2059
R00253_F	-90.6576	-97.8365	-105.015	-112.194	-119.373	-126.552	-133.731	-140.91
R00253_R	-51.8576	-59.0365	-66.2154	-73.3943	-80.5731	-87.752	-94.9309	-102.11
R00254_F	44.7485	43.3127	41.8769	40.4411	39.0054	37.5696	36.1338	34.698
R00254_R	-139.759	-147.895	-156.031	-164.167	-172.303	-180.439	-188.575	-196.711
R00256_F	-68.5556	-73.8201	-79.0846	-84.3491	-89.6136	-94.8782	-100.143	-105.407
R00256_R	-2.70203	-4.6164	-6.53077	-8.44514	-10.3595	-12.2739	-14.1882	-16.1026
R00257_F	-155.961	-166.011	-176.062	-186.112	-196.162	-206.213	-216.263	-226.314
R00257_R	-10.3071	-17.0074	-23.7077	-30.408	-37.1083	-43.8086	-50.5089	-57.2091
R00258_F	-53.2051	-57.991	-62.7769	-67.5628	-72.3488	-77.1347	-81.9206	-86.7065
R00258_R	-41.8051	-46.591	-51.3769	-56.1628	-60.9488	-65.7347	-70.5206	-75.3065
R00259_F	-68.8051	-73.591	-78.3769	-83.1628	-87.9488	-92.7347	-97.5206	-102.307
R00259_R	-26.2051	-30.991	-35.7769	-40.5628	-45.3488	-50.1347	-54.9206	-59.7065
R00260_F	-29.5525	-31.9455	-34.3385	-36.7314	-39.1244	-41.5173	-43.9103	-46.3033
R00260_R	-17.9525	-20.3455	-22.7385	-25.1314	-27.5244	-29.9173	-32.3103	-34.7033
R00261_F	-73.7556	-79.0201	-84.2846	-89.5491	-94.8136	-100.078	-105.343	-110.607
R00261_R	2.49797	0.583602	-1.33077	-3.24514	-5.15951	-7.07388	-8.98824	-10.9026
R00262_F	-30.8525	-33.2455	-35.6385	-38.0314	-40.4244	-42.8173	-45.2103	-47.6033
R00262_R	-16.6525	-19.0455	-21.4385	-23.8314	-26.2244	-28.6173	-31.0103	-33.4033
R00264_F	-93.3051	-98.091	-102.877	-107.663	-112.449	-117.235	-122.021	-126.807
R00264_R	-1.70507	-6.491	-11.2769	-16.0628	-20.8488	-25.6347	-30.4206	-35.2065
R00265_F	-99.2576	-106.436	-113.615	-120.794	-127.973	-135.152	-142.331	-149.51
R00265_R	-43.2576	-50.4365	-57.6154	-64.7943	-71.9731	-79.152	-86.3309	-93.5098
R00267_F	-72.8081	-80.4656	-88.1231	-95.7805	-103.438	-111.096	-118.753	-126.41
R00267_R	-45.9546	-50.2619	-54.5692	-58.8766	-63.1839	-67.4912	-71.7986	-76.1059
R00268_F	-59.2556	-64.5201	-69.7846	-75.0491	-80.3136	-85.5782	-90.8427	-96.1072
R00268_R	-12.002	-13.9164	-15.8308	-17.7451	-19.6595	-21.5739	-23.4882	-25.4026
R00269_F	-60.9556	-66.2201	-71.4846	-76.7491	-82.0136	-87.2782	-92.5427	-97.8072
R00269_R	-10.302	-12.2164	-14.1308	-16.0451	-17.9595	-19.8739	-21.7882	-23.7026
R00270_F	30.798	28.8836	26.9692	25.0549	23.1405	21.2261	19.3118	17.3974
R00270_R	-102.056	-107.32	-112.585	-117.849	-123.114	-128.378	-133.643	-138.907
R00271_F	-61.6051	-66.391	-71.1769	-75.9628	-80.7488	-85.5347	-90.3206	-95.1065
R00271_R	-33.4051	-38.191	-42.9769	-47.7628	-52.5488	-57.3347	-62.1206	-66.9065
R00272_F	-62.8556	-68.1201	-73.3846	-78.6491	-83.9136	-89.1782	-94.4427	-99.7072
R00272_R	-8.40203	-10.3164	-12.2308	-14.1451	-16.0595	-17.9739	-19.8882	-21.8026
R00273_F	-226.008	-233.666	-241.323	-248.981	-256.638	-264.296	-271.953	-279.61
R00273_R	107.245	102.938	98.6308	94.3234	90.0161	85.7088	81.4014	77.0941
R00274_F	-328.752	-330.187	-331.623	-333.059	-334.495	-335.93	-337.366	-338.802
R00274_R	233.741	225.605	217.469	209.333	201.197	193.061	184.925	176.789
R00276_F	130.495	125.709	120.923	116.137	111.351	106.565	101.779	96.9935
R00276_R	-225.505	-230.291	-235.077	-239.863	-244.649	-249.435	-254.221	-259.007
R00277_F	-172.008	-179.666	-187.323	-194.981	-202.638	-210.296	-217.953	-225.61
R00277_R	53.2454	48.9381	44.6308	40.3234	36.0161	31.7088	27.4014	23.0941
R00278_F	-159.505	-164.291	-169.077	-173.863	-178.649	-183.435	-188.221	-193.007
R00278_R	64.4949	59.709	54.9231	50.1372	45.3512	40.5653	35.7794	30.9935
R00279_F	-171.008	-178.666	-186.323	-193.981	-201.638	-209.296	-216.953	-224.61
R00279_R	52.2454	47.9381	43.6308	39.3234	35.0161	30.7088	26.4014	22.0941
R00286_F	-85.0576	-92.2365	-99.4154	-106.594	-113.773	-120.952	-128.131	-135.31
R00286_R	-57.4576	-64.6365	-71.8154	-78.9943	-86.1731	-93.352	-100.531	-107.71
R00287_F	-103.256	-108.52	-113.785	-119.049	-124.314	-129.578	-134.843	-140.107
R00287_R	31.998	30.0836	28.1692	26.2549	24.3405	22.4261	20.5118	18.5974
R00289_F	-61.2051	-65.991	-70.7769	-75.5628	-80.3488	-85.1347	-89.9206	-94.7065
R00289_R	-33.8051	-38.591	-43.3769	-48.1628	-52.9488	-57.7347	-62.5206	-67.3065
R00291_F	-20.8525	-23.2455	-25.6385	-28.0314	-30.4244	-32.8173	-35.2103	-37.6033
R00291_R	-26.6525	-29.0455	-31.4385	-33.8314	-36.2244	-38.6173	-41.0103	-43.4033
R00293_F	-87.6525	-90.0455	-92.4385	-94.8314	-97.2244	-99.6173	-102.01	-104.403
R00293_R	40.1475	37.7545	35.3615	32.9686	30.5756	28.1827	25.7897	23.3967
R00299_F	-69.0051	-73.791	-78.5769	-83.3628	-88.1488	-92.9347	-97.7206	-102.507
R00299_R	-26.0051	-30.791	-35.5769	-40.3628	-45.1488	-49.9347	-54.7206	-59.5065
R00300_F	-43.3051	-48.091	-52.8769	-57.6628	-62.4488	-67.2347	-72.0206	-76.8065
R00300_R	-51.7051	-56.491	-61.2769	-66.0628	-70.8488	-75.6347	-80.4206	-85.2065
R00301_F	-59.5051	-64.291	-69.0769	-73.8628	-78.6488	-83.4347	-88.2206	-93.0065
R00301_R	-35.5051	-40.291	-45.0769	-49.8628	-54.6488	-59.4347	-64.2206	-69.0065
R00302_F	-179.505	-184.291	-189.077	-193.863	-198.649	-203.435	-208.221	-213.007
R00302_R	84.4949	79.709	74.9231	70.1372	65.3512	60.5653	55.7794	50.9935
R00303_F	-66.4556	-71.7201	-76.9846	-82.2491	-87.5136	-92.7782	-98.0427	-103.307
R00303_R	-4.80203	-6.7164	-8.63077	-10.5451	-12.4595	-14.3739	-16.2882	-18.2026
R00304_F	-74.7556	-80.0201	-85.2846	-90.5491	-95.8136	-101.078	-106.343	-111.607
R00304_R	3.49797	1.5836	-0.330768	-2.24514	-4.15951	-6.07388	-7.98824	-9.90261
R00306_F	-65.0556	-70.3201	-75.5846	-80.8491	-86.1136	-91.3782	-96.6427	-101.907
R00306_R	-6.20203	-8.1164	-10.0308	-11.9451	-13.8595	-15.7739	-17.6882	-19.6026
R00307_F	-23.8725	-26.2655	-28.6585	-31.0514	-33.4444	-35.8373	-38.2303	-40.6233
R00307_R	-23.6325	-26.0255	-28.4185	-30.8114	-33.2044	-35.5973	-37.9903	-40.3833
R00315_F	-33.6051	-38.391	-43.1769	-47.9628	-52.7488	-57.5347	-62.3206	-67.1065
R00315_R	-61.4051	-66.191	-70.9769	-75.7628	-80.5488	-85.3347	-90.1206	-94.9065
R00317_F	-101.856	-107.12	-112.385	-117.649	-122.914	-128.178	-133.443	-138.707
R00317_R	30.598	28.6836	26.7692	24.8549	22.9405	21.0261	19.1118	17.1974
R00318_F	-156.256	-161.52	-166.785	-172.049	-177.314	-182.578	-187.843	-193.107
R00318_R	84.998	83.0836	81.1692	79.2549	77.3405	75.4261	73.5118	71.5974
R00319_F	-546.505	-551.291	-556.077	-560.863	-565.649	-570.435	-575.221	-580.007
R00319_R	451.495	446.709	441.923	437.137	432.351	427.565	422.779	417.993
R00320_F	-11.8051	-16.591	-21.3769	-26.1628	-30.9488	-35.7347	-40.5206	-45.3065
R00320_R	-83.2051	-87.991	-92.7769	-97.5628	-102.349	-107.135	-111.921	-116.707
R00321_F	-80.9556	-86.2201	-91.4846	-96.7491	-102.014	-107.278	-112.543	-117.807
R00321_R	9.69797	7.7836	5.86923	3.95486	2.04049	0.126125	-1.78824	-3.70261
R00324_F	-115.256	-120.52	-125.785	-131.049	-136.314	-141.578	-146.843	-152.107
R00324_R	43.998	42.0836	40.1692	38.2549	36.3405	34.4261	32.5118	30.5974
R00325_F	-59.4556	-64.7201	-69.9846	-75.2491	-80.5136	-85.7782	-91.0427	-96.3072
R00325_R	-11.802	-13.7164	-15.6308	-17.5451	-19.4595	-21.3739	-23.2882	-25.2026
R00327_F	-85.7556	-91.0201	-96.2846	-101.549	-106.814	-112.078	-117.343	-122.607
R00327_R	14.498	12.5836	10.6692	8.75486	6.84049	4.92612	3.01176	1.09739
R00328_F	-85.6556	-90.9201	-96.1846	-101.449	-106.714	-111.978	-117.243	-122.507
R00328_R	14.398	12.4836	10.5692	8.65486	6.74049	4.82612	2.91176	0.997386
R00330_F	-46.0051	-50.791	-55.5769	-60.3628	-65.1488	-69.9347	-74.7206	-79.5065
R00330_R	-49.0051	-53.791	-58.5769	-63.3628	-68.1488	-72.9347	-77.7206	-82.5065
R00332_F	-49.8051	-54.591	-59.3769	-64.1628	-68.9488	-73.7347	-78.5206	-83.3065
R00332_R	-45.2051	-49.991	-54.7769	-59.5628	-64.3488	-69.1347	-73.9206	-78.7065
R00335_F	-89.4556	-94.7201	-99.9846	-105.249	-110.514	-115.778	-121.043	-126.307
R00335_R	18.198	16.2836	14.3692	12.4549	10.5405	8.62612	6.71176	4.79739
R00337_F	-89.1556	-94.4201	-99.6846	-104.949	-110.214	-115.478	-120.743	-126.007
R00337_R	17.898	15.9836	14.0692	12.1549	10.2405	8.32612	6.41176	4.49739
R00338_F	-113.256	-118.52	-123.785	-129.049	-134.314	-139.578	-144.843	-150.107
R00338_R	41.998	40.0836	38.1692	36.2549	34.3405	32.4261	30.5118	28.5974
R00339_F	-67.3525	-69.7455	-72.1385	-74.5314	-76.9244	-79.3173	-81.7103	-84.1033
R00339_R	19.8475	17.4545	15.0615	12.6686	10.2756	7.88266	5.48969	3.09673
R00340_F	-67.3525	-69.7455	-72.1385	-74.5314	-76.9244	-79.3173	-81.7103	-84.1033
R00340_R	19.8475	17.4545	15.0615	12.6686	10.2756	7.88266	5.48969	3.09673
R00341_F	-65.6081	-73.2656	-80.9231	-88.5805	-96.238	-103.896	-111.553	-119.21
R00341_R	-53.1546	-57.4619	-61.7692	-66.0766	-70.3839	-74.6912	-78.9986	-83.3059
R00342_F	-13.3051	-18.091	-22.8769	-27.6628	-32.4488	-37.2347	-42.0206	-46.8065
R00342_R	-81.7051	-86.491	-91.2769	-96.0628	-100.849	-105.635	-110.421	-115.207
R00343_F	-22.9051	-27.691	-32.4769	-37.2628	-42.0488	-46.8347	-51.6206	-56.4065
R00343_R	-72.1051	-76.891	-81.6769	-86.4628	-91.2488	-96.0347	-100.821	-105.607
R00344_F	-82.4576	-89.6365	-96.8154	-103.994	-111.173	-118.352	-125.531	-132.71
R00344_R	-60.0576	-67.2365	-74.4154	-81.5943	-88.7731	-95.952	-103.131	-110.31
R00345_F	-1.40507	-6.191	-10.9769	-15.7628	-20.5488	-25.3347	-30.1206	-34.9065
R00345_R	-93.6051	-98.391	-103.177	-107.963	-112.749	-117.535	-122.321	-127.107
R00346_F	-43.7081	-51.3656	-59.0231	-66.6805	-74.338	-81.9955	-89.653	-97.3105
R00346_R	-75.0546	-79.3619	-83.6692	-87.9766	-92.2839	-96.5912	-100.899	-105.206
R00347_F	-86.7556	-92.0201	-97.2846	-102.549	-107.814	-113.078	-118.343	-123.607
R00347_R	15.498	13.5836	11.6692	9.75486	7.84049	5.92612	4.01176	2.09739
R00348_F	-69.3556	-74.6201	-79.8846	-85.1491	-90.4136	-95.6782	-100.943	-106.207
R00348_R	-1.90203	-3.8164	-5.73077	-7.64514	-9.55951	-11.4739	-13.3882	-15.3026
R00350_F	-56.9556	-62.2201	-67.4846	-72.7491	-78.0136	-83.2782	-88.5427	-93.8072
R00350_R	-14.302	-16.2164	-18.1308	-20.0451	-21.9595	-23.8739	-25.7882	-27.7026
R00351_F	-9.00507	-13.791	-18.5769	-23.3628	-28.1488	-32.9347	-37.7206	-42.5065
R00351_R	-86.0051	-90.791	-95.5769	-100.363	-105.149	-109.935	-114.721	-119.507
R00352_F	-96.9607	-107.011	-117.062	-127.112	-137.162	-147.213	-157.263	-167.314
R00352_R	-69.3071	-76.0074	-82.7077	-89.408	-96.1083	-102.809	-109.509	-116.209
R00353_F	-41.8051	-46.591	-51.3769	-56.1628	-60.9488	-65.7347	-70.5206	-75.3065
R00353_R	-53.2051	-57.991	-62.7769	-67.5628	-72.3488	-77.1347	-81.9206	-86.7065
R00354_F	-66.2556	-71.5201	-76.7846	-82.0491	-87.3136	-92.5782	-97.8427	-103.107
R00354_R	-5.00203	-6.9164	-8.83077	-10.7451	-12.6595	-14.5739	-16.4882	-18.4026
R00355_F	-42.6051	-47.391	-52.1769	-56.9628	-61.7488	-66.5347	-71.3206	-76.1065
R00355_R	-52.4051	-57.191	-61.9769	-66.7628	-71.5488	-76.3347	-81.1206	-85.9065
R00357_F	-172.008	-179.666	-187.323	-194.981	-202.638	-210.296	-217.953	-225.61
R00357_R	53.2454	48.9381	44.6308	40.3234	36.0161	31.7088	27.4014	23.0941
R00359_F	-183.008	-190.666	-198.323	-205.981	-213.638	-221.296	-228.953	-236.61
R00359_R	64.2454	59.9381	55.6308	51.3234	47.0161	42.7088	38.4014	34.0941
R00360_F	-154.505	-159.291	-164.077	-168.863	-173.649	-178.435	-183.221	-188.007
R00360_R	59.4949	54.709	49.9231	45.1372	40.3512	35.5653	30.7794	25.9935
R00362_F	-45.1556	-50.4201	-55.6846	-60.9491	-66.2136	-71.4782	-76.7427	-82.0072
R00362_R	-26.102	-28.0164	-29.9308	-31.8451	-33.7595	-35.6739	-37.5882	-39.5026
R00363_F	-15.2525	-17.6455	-20.0385	-22.4314	-24.8244	-27.2173	-29.6103	-32.0033
R00363_R	-32.2525	-34.6455	-37.0385	-39.4314	-41.8244	-44.2173	-46.6103	-49.0033
R00365_F	-17.7081	-25.3656	-33.0231	-40.6805	-48.338	-55.9955	-63.653	-71.3105
R00365_R	-101.055	-105.362	-109.669	-113.977	-118.284	-122.591	-126.899	-131.206
R00366_F	-159.008	-166.666	-174.323	-181.981	-189.638	-197.296	-204.953	-212.61
R00366_R	40.2454	35.9381	31.6308	27.3234	23.0161	18.7088	14.4014	10.0941
R00368_F	-46.0081	-53.6656	-61.3231	-68.9805	-76.638	-84.2955	-91.953	-99.6105
R00368_R	-72.7546	-77.0619	-81.3692	-85.6766	-89.9839	-94.2912	-98.5986	-102.906
R00369_F	-71.2051	-75.991	-80.7769	-85.5628	-90.3488	-95.1347	-99.9206	-104.707
R00369_R	-23.8051	-28.591	-33.3769	-38.1628	-42.9488	-47.7347	-52.5206	-57.3065
R00371_F	-2.50507	-7.291	-12.0769	-16.8628	-21.6488	-26.4347	-31.2206	-36.0065
R00371_R	-92.5051	-97.291	-102.077	-106.863	-111.649	-116.435	-121.221	-126.007
R00372_F	-29.5051	-34.291	-39.0769	-43.8628	-48.6488	-53.4347	-58.2206	-63.0065
R00372_R	-65.5051	-70.291	-75.0769	-79.8628	-84.6488	-89.4347	-94.2206	-99.0065
R00373_F	-34.4051	-39.191	-43.9769	-48.7628	-53.5488	-58.3347	-63.1206	-67.9065
R00373_R	-60.6051	-65.391	-70.1769	-74.9628	-79.7488	-84.5347	-89.3206	-94.1065
R00396_F	-41.4081	-49.0656	-56.7231	-64.3805	-72.038	-79.6955	-87.353	-95.0105
R00396_R	-77.3546	-81.6619	-85.9692	-90.2766	-94.5839	-98.8912	-103.199	-107.506
R00397_F	-61.3556	-66.6201	-71.8846	-77.1491	-82.4136	-87.6782	-92.9427	-98.2072
R00397_R	-9.90203	-11.8164	-13.7308	-15.6451	-17.5595	-19.4739	-21.3882	-23.3026
R00398_F	-41.2081	-48.8656	-56.5231	-64.1805	-71.838	-79.4955	-87.153	-94.8105
R00398_R	-77.5546	-81.8619	-86.1692	-90.4766	-94.7839	-99.0912	-103.399	-107.706
R00399_F	-9.50507	-14.291	-19.0769	-23.8628	-28.6488	-33.4347	-38.2206	-43.0065
R00399_R	-85.5051	-90.291	-95.0769	-99.8628	-104.649	-109.435	-114.221	-119.007
R00400_F	-58.1051	-62.891	-67.6769	-72.4628	-77.2488	-82.0347	-86.8206	-91.6065
R00400_R	-36.9051	-41.691	-46.4769	-51.2628	-56.0488	-60.8347	-65.6206	-70.4065
R00402_F	24.7949	20.009	15.2231	10.4372	5.65123	0.865312	-3.92061	-8.70653
R00402_R	-119.805	-124.591	-129.377	-134.163	-138.949	-143.735	-148.521	-153.307
R00405_F	-80.2576	-87.4365	-94.6154	-101.794	-108.973	-116.152	-123.331	-130.51
R00405_R	-62.2576	-69.4365	-76.6154	-83.7943	-90.9731	-98.152	-105.331	-112.51
R00406_F	-55.5051	-60.291	-65.0769	-69.8628	-74.6488	-79.4347	-84.2206	-89.0065
R00406_R	-39.5051	-44.291	-49.0769	-53.8628	-58.6488	-63.4347	-68.2206	-73.0065
R00407_F	-78.9556	-84.2201	-89.4846	-94.7491	-100.014	-105.278	-110.543	-115.807
R00407_R	7.69797	5.7836	3.86923	1.95486	0.0404939	-1.87388	-3.78824	-5.70261
R00408_F	-7.50507	-12.291	-17.0769	-21.8628	-26.6488	-31.4347	-36.2206	-41.0065
R00408_R	-87.5051	-92.291	-97.0769	-101.863	-106.649	-111.435	-116.221	-121.007
R00409_F	-66.6556	-71.9201	-77.1846	-82.4491	-87.7136	-92.9782	-98.2427	-103.507
R00409_R	-4.60203	-6.5164	-8.43077	-10.3451	-12.2595	-14.1739	-16.0882	-18.0026
R00410_F	-40.4051	-45.191	-49.9769	-54.7628	-59.5488	-64.3347	-69.1206	-73.9065
R00410_R	-54.6051	-59.391	-64.1769	-68.9628	-73.7488	-78.5347	-83.3206	-88.1065
R00411_F	-66.2556	-71.5201	-76.7846	-82.0491	-87.3136	-92.5782	-97.8427	-103.107
R00411_R	-5.00203	-6.9164	-8.83077	-10.7451	-12.6595	-14.5739	-16.4882	-18.4026
R00414_F	-84.6556	-89.9201	-95.1846	-100.449	-105.714	-110.978	-116.243	-121.507
R00414_R	13.398	11.4836	9.56923	7.65486	5.74049	3.82612	1.91176	-0.00261386
R00416_F	-82.6051	-87.391	-92.1769	-96.9628	-101.749	-106.535	-111.321	-116.107
R00416_R	-12.4051	-17.191	-21.9769	-26.7628	-31.5488	-36.3347	-41.1206	-45.9065
R00418_F	-22.8525	-25.2455	-27.6385	-30.0314	-32.4244	-34.8173	-37.2103	-39.6033
R00418_R	-24.6525	-27.0455	-29.4385	-31.8314	-34.2244	-36.6173	-39.0103	-41.4033
R00420_F	-18.7525	-21.1455	-23.5385	-25.9314	-28.3244	-30.7173	-33.1103	-35.5033
R00420_R	-28.7525	-31.1455	-33.5385	-35.9314	-38.3244	-40.7173	-43.1103	-45.5033
R00421_F	-69.3576	-76.5365	-83.7154	-90.8943	-98.0731	-105.252	-112.431	-119.61
R00421_R	-73.1576	-80.3365	-87.5154	-94.6943	-101.873	-109.052	-116.231	-123.41
R00426_F	-109.056	-114.32	-119.585	-124.849	-130.114	-135.378	-140.643	-145.907
R00426_R	37.798	35.8836	33.9692	32.0549	30.1405	28.2261	26.3118	24.3974
R00428_F	7.34746	4.9545	2.56154	0.168579	-2.22438	-4.61734	-7.01031	-9.40327
R00428_R	-54.8525	-57.2455	-59.6385	-62.0314	-64.4244	-66.8173	-69.2103	-71.6033
R00430_F	-18.9051	-23.691	-28.4769	-33.2628	-38.0488	-42.8347	-47.6206	-52.4065
R00430_R	-76.1051	-80.891	-85.6769	-90.4628	-95.2488	-100.035	-104.821	-109.607
R00431_F	-67.1081	-74.7656	-82.4231	-90.0805	-97.738	-105.396	-113.053	-120.71
R00431_R	-51.6546	-55.9619	-60.2692	-64.5766	-68.8839	-73.1912	-77.4986	-81.8059
R00432_F	-81.7576	-88.9365	-96.1154	-103.294	-110.473	-117.652	-124.831	-132.01
R00432_R	-60.7576	-67.9365	-75.1154	-82.2943	-89.4731	-96.652	-103.831	-111.01
R00445_F	-87.0081	-94.6656	-102.323	-109.981	-117.638	-125.296	-132.953	-140.61
R00445_R	-31.7546	-36.0619	-40.3692	-44.6766	-48.9839	-53.2912	-57.5986	-61.9059
R00446_F	-30.4081	-38.0656	-45.7231	-53.3805	-61.038	-68.6955	-76.353	-84.0105
R00446_R	-88.3546	-92.6619	-96.9692	-101.277	-105.584	-109.891	-114.199	-118.506
R00447_F	-180.008	-187.666	-195.323	-202.981	-210.638	-218.296	-225.953	-233.61
R00447_R	61.2454	56.9381	52.6308	48.3234	44.0161	39.7088	35.4014	31.0941
R00449_F	-512.505	-517.291	-522.077	-526.863	-531.649	-536.435	-541.221	-546.007
R00449_R	417.495	412.709	407.923	403.137	398.351	393.565	388.779	383.993
R00451_F	-69.2556	-74.5201	-79.7846	-85.0491	-90.3136	-95.5782	-100.843	-106.107
R00451_R	-2.00203	-3.9164	-5.83077	-7.74514	-9.65951	-11.5739	-13.4882	-15.4026
R00452_F	-48.7081	-56.3656	-64.0231	-71.6805	-79.338	-86.9955	-94.653	-102.31
R00452_R	-70.0546	-74.3619	-78.6692	-82.9766	-87.2839	-91.5912	-95.8986	-100.206
R00453_F	-36.5051	-41.291	-46.0769	-50.8628	-55.6488	-60.4347	-65.2206	-70.0065
R00453_R	-58.5051	-63.291	-68.0769	-72.8628	-77.6488	-82.4347	-87.2206	-92.0065
R00454_F	-68.8051	-73.591	-78.3769	-83.1628	-87.9488	-92.7347	-97.5206	-102.307
R00454_R	-26.2051	-30.991	-35.7769	-40.5628	-45.3488	-50.1347	-54.9206	-59.7065
R00457_F	-42.2051	-46.991	-51.7769	-56.5628	-61.3488	-66.1347	-70.9206	-75.7065
R00457_R	-52.8051	-57.591	-62.3769	-67.1628	-71.9488	-76.7347	-81.5206	-86.3065
R00458_F	-62.4556	-67.7201	-72.9846	-78.2491	-83.5136	-88.7782	-94.0427	-99.3072
R00458_R	-8.80203	-10.7164	-12.6308	-14.5451	-16.4595	-18.3739	-20.2882	-22.2026
R00461_F	-28.2525	-30.6455	-33.0385	-35.4314	-37.8244	-40.2173	-42.6103	-45.0033
R00461_R	-19.2525	-21.6455	-24.0385	-26.4314	-28.8244	-31.2173	-33.6103	-36.0033
R00462_F	-76.6556	-81.9201	-87.1846	-92.4491	-97.7136	-102.978	-108.243	-113.507
R00462_R	5.39797	3.4836	1.56923	-0.345137	-2.25951	-4.17388	-6.08824	-8.00261
R00463_F	-4.75254	-7.1455	-9.53846	-11.9314	-14.3244	-16.7173	-19.1103	-21.5033
R00463_R	-42.7525	-45.1455	-47.5385	-49.9314	-52.3244	-54.7173	-57.1103	-59.5033
R00465_F	0.694927	-4.091	-8.87692	-13.6628	-18.4488	-23.2347	-28.0206	-32.8065
R00465_R	-95.7051	-100.491	-105.277	-110.063	-114.849	-119.635	-124.421	-129.207
R00466_F	-218.505	-223.291	-228.077	-232.863	-237.649	-242.435	-247.221	-252.007
R00466_R	123.495	118.709	113.923	109.137	104.351	99.5653	94.7794	89.9935
R00468_F	-63.2546	-67.5619	-71.8692	-76.1766	-80.4839	-84.7912	-89.0986	-93.4059
R00468_R	-55.5081	-63.1656	-70.8231	-78.4805	-86.138	-93.7955	-101.453	-109.11
R00469_F	-134.262	-145.269	-156.277	-167.285	-178.292	-189.3	-200.307	-211.315
R00469_R	15.499	14.5418	13.5846	12.6274	11.6702	10.7131	9.75588	8.79869
R00470_F	-39.2556	-44.5201	-49.7846	-55.0491	-60.3136	-65.5782	-70.8427	-76.1072
R00470_R	-32.002	-33.9164	-35.8308	-37.7451	-39.6595	-41.5739	-43.4882	-45.4026
R00471_F	-48.7556	-54.0201	-59.2846	-64.5491	-69.8136	-75.0782	-80.3427	-85.6072
R00471_R	-22.502	-24.4164	-26.3308	-28.2451	-30.1595	-32.0739	-33.9882	-35.9026
R00472_F	-12.5051	-17.291	-22.0769	-26.8628	-31.6488	-36.4347	-41.2206	-46.0065
R00472_R	-82.5051	-87.291	-92.0769	-96.8628	-101.649	-106.435	-111.221	-116.007
R00473_F	-35.6556	-40.9201	-46.1846	-51.4491	-56.7136	-61.9782	-67.2427	-72.5072
R00473_R	-35.602	-37.5164	-39.4308	-41.3451	-43.2595	-45.1739	-47.0882	-49.0026
R00474_F	-27.5051	-32.291	-37.0769	-41.8628	-46.6488	-51.4347	-56.2206	-61.0065
R00474_R	-67.5051	-72.291	-77.0769	-81.8628	-86.6488	-91.4347	-96.2206	-101.007
R00475_F	-130.505	-135.291	-140.077	-144.863	-149.649	-154.435	-159.221	-164.007
R00475_R	35.4949	30.709	25.9231	21.1372	16.3512	11.5653	6.77939	1.99347
R00477_F	-46.6556	-51.9201	-57.1846	-62.4491	-67.7136	-72.9782	-78.2427	-83.5072
R00477_R	-24.602	-26.5164	-28.4308	-30.3451	-32.2595	-34.1739	-36.0882	-38.0026
R00478_F	-56.2556	-61.5201	-66.7846	-72.0491	-77.3136	-82.5782	-87.8427	-93.1072
R00478_R	-15.002	-16.9164	-18.8308	-20.7451	-22.6595	-24.5739	-26.4882	-28.4026
R00479_F	-44.9556	-50.2201	-55.4846	-60.7491	-66.0136	-71.2782	-76.5427	-81.8072
R00479_R	-26.302	-28.2164	-30.1308	-32.0451	-33.9595	-35.8739	-37.7882	-39.7026
R00480_F	-25.4051	-30.191	-34.9769	-39.7628	-44.5488	-49.3347	-54.1206	-58.9065
R00480_R	-69.6051	-74.391	-79.1769	-83.9628	-88.7488	-93.5347	-98.3206	-103.107
R00481_F	-112.505	-117.291	-122.077	-126.863	-131.649	-136.435	-141.221	-146.007
R00481_R	17.4949	12.709	7.92308	3.13716	-1.64877	-6.43469	-11.2206	-16.0065
R00482_F	-84.3576	-91.5365	-98.7154	-105.894	-113.073	-120.252	-127.431	-134.61
R00482_R	-58.1576	-65.3365	-72.5154	-79.6943	-86.8731	-94.052	-101.231	-108.41
R00483_F	-98.2576	-105.436	-112.615	-119.794	-126.973	-134.152	-141.331	-148.51
R00483_R	-44.2576	-51.4365	-58.6154	-65.7943	-72.9731	-80.152	-87.3309	-94.5098
R00484_F	-115.759	-123.895	-132.031	-140.167	-148.303	-156.439	-164.575	-172.711
R00484_R	20.7485	19.3127	17.8769	16.4411	15.0054	13.5696	12.1338	10.698
R00485_F	-74.8556	-80.1201	-85.3846	-90.6491	-95.9136	-101.178	-106.443	-111.707
R00485_R	3.59797	1.6836	-0.230768	-2.14514	-4.05951	-5.97388	-7.88824	-9.80261
R00487_F	-56.6051	-61.391	-66.1769	-70.9628	-75.7488	-80.5347	-85.3206	-90.1065
R00487_R	-38.4051	-43.191	-47.9769	-52.7628	-57.5488	-62.3347	-67.1206	-71.9065
R00488_F	-74.5556	-79.8201	-85.0846	-90.3491	-95.6136	-100.878	-106.143	-111.407
R00488_R	3.29797	1.3836	-0.530768	-2.44514	-4.35951	-6.27388	-8.18824	-10.1026
R00489_F	-66.2556	-71.5201	-76.7846	-82.0491	-87.3136	-92.5782	-97.8427	-103.107
R00489_R	-5.00203	-6.9164	-8.83077	-10.7451	-12.6595	-14.5739	-16.4882	-18.4026
R00490_F	-37.5556	-42.8201	-48.0846	-53.3491	-58.6136	-63.8782	-69.1427	-74.4072
R00490_R	-33.702	-35.6164	-37.5308	-39.4451	-41.3595	-43.2739	-45.1882	-47.1026
R00491_F	-12.2525	-14.6455	-17.0385	-19.4314	-21.8244	-24.2173	-26.6103	-29.0033
R00491_R	-35.2525	-37.6455	-40.0385	-42.4314	-44.8244	-47.2173	-49.6103	-52.0033
R00494_F	-55.2556	-60.5201	-65.7846	-71.0491	-76.3136	-81.5782	-86.8427	-92.1072
R00494_R	-16.002	-17.9164	-19.8308	-21.7451	-23.6595	-25.5739	-27.4882	-29.4026
R00497_F	-103.858	-111.036	-118.215	-125.394	-132.573	-139.752	-146.931	-154.11
R00497_R	-38.6576	-45.8365	-53.0154	-60.1943	-67.3731	-74.552	-81.7309	-88.9098
R00499_F	-93.6556	-98.9201	-104.185	-109.449	-114.714	-119.978	-125.243	-130.507
R00499_R	22.398	20.4836	18.5692	16.6549	14.7405	12.8261	10.9118	8.99739
R00501_F	-89.4576	-96.6365	-103.815	-110.994	-118.173	-125.352	-132.531	-139.71
R00501_R	-53.0576	-60.2365	-67.4154	-74.5943	-81.7731	-88.952	-96.1309	-103.31
R00502_F	-70.4051	-75.191	-79.9769	-84.7628	-89.5488	-94.3347	-99.1206	-103.907
R00502_R	-24.6051	-29.391	-34.1769	-38.9628	-43.7488	-48.5347	-53.3206	-58.1065
R00503_F	-73.5051	-78.291	-83.0769	-87.8628	-92.6488	-97.4347	-102.221	-107.007
R00503_R	-21.5051	-26.291	-31.0769	-35.8628	-40.6488	-45.4347	-50.2206	-55.0065
R00505_F	-22.6525	-25.0455	-27.4385	-29.8314	-32.2244	-34.6173	-37.0103	-39.4033
R00505_R	-24.8525	-27.2455	-29.6385	-32.0314	-34.4244	-36.8173	-39.2103	-41.6033
R00507_F	-144.256	-149.52	-154.785	-160.049	-165.314	-170.578	-175.843	-181.107
R00507_R	72.998	71.0836	69.1692	67.2549	65.3405	63.4261	61.5118	59.5974
R00508_F	-65.2556	-70.5201	-75.7846	-81.0491	-86.3136	-91.5782	-96.8427	-102.107
R00508_R	-6.00203	-7.9164	-9.83077	-11.7451	-13.6595	-15.5739	-17.4882	-19.4026
R00509_F	-70.5051	-75.291	-80.0769	-84.8628	-89.6488	-94.4347	-99.2206	-104.007
R00509_R	-24.5051	-29.291	-34.0769	-38.8628	-43.6488	-48.4347	-53.2206	-58.0065
R00510_F	-72.7556	-78.0201	-83.2846	-88.5491	-93.8136	-99.0782	-104.343	-109.607
R00510_R	1.49797	-0.416398	-2.33077	-4.24514	-6.15951	-8.07388	-9.98824	-11.9026
R00511_F	-83.7556	-89.0201	-94.2846	-99.5491	-104.814	-110.078	-115.343	-120.607
R00511_R	12.498	10.5836	8.66923	6.75486	4.84049	2.92612	1.01176	-0.902614
R00512_F	-53.5051	-58.291	-63.0769	-67.8628	-72.6488	-77.4347	-82.2206	-87.0065
R00512_R	-41.5051	-46.291	-51.0769	-55.8628	-60.6488	-65.4347	-70.2206	-75.0065
R00513_F	-51.8051	-56.591	-61.3769	-66.1628	-70.9488	-75.7347	-80.5206	-85.3065
R00513_R	-43.2051	-47.991	-52.7769	-57.5628	-62.3488	-67.1347	-71.9206	-76.7065
R00514_F	-81.9556	-87.2201	-92.4846	-97.7491	-103.014	-108.278	-113.543	-118.807
R00514_R	10.698	8.7836	6.86923	4.95486	3.04049	1.12612	-0.788245	-2.70261
R00515_F	-102.756	-108.02	-113.285	-118.549	-123.814	-129.078	-134.343	-139.607
R00515_R	31.498	29.5836	27.6692	25.7549	23.8405	21.9261	20.0118	18.0974
R00516_F	-62.0051	-66.791	-71.5769	-76.3628	-81.1488	-85.9347	-90.7206	-95.5065
R00516_R	-33.0051	-37.791	-42.5769	-47.3628	-52.1488	-56.9347	-61.7206	-66.5065
R00517_F	-53.3051	-58.091	-62.8769	-67.6628	-72.4488	-77.2347	-82.0206	-86.8065
R00517_R	-41.7051	-46.491	-51.2769	-56.0628	-60.8488	-65.6347	-70.4206	-75.2065
R00518_F	-53.5051	-58.291	-63.0769	-67.8628	-72.6488	-77.4347	-82.2206	-87.0065
R00518_R	-41.5051	-46.291	-51.0769	-55.8628	-60.6488	-65.4347	-70.2206	-75.0065
R00519_F	-49.6051	-54.391	-59.1769	-63.9628	-68.7488	-73.5347	-78.3206	-83.1065
R00519_R	-45.4051	-50.191	-54.9769	-59.7628	-64.5488	-69.3347	-74.1206	-78.9065
R00521_F	-61.2556	-66.5201	-71.7846	-77.0491	-82.3136	-87.5782	-92.8427	-98.1072
R00521_R	-10.002	-11.9164	-13.8308	-15.7451	-17.6595	-19.5739	-21.4882	-23.4026
R00522_F	-59.2556	-64.5201	-69.7846	-75.0491	-80.3136	-85.5782	-90.8427	-96.1072
R00522_R	-12.002	-13.9164	-15.8308	-17.7451	-19.6595	-21.5739	-23.4882	-25.4026
R00524_F	-85.2556	-90.5201	-95.7846	-101.049	-106.314	-111.578	-116.843	-122.107
R00524_R	13.998	12.0836	10.1692	8.25486	6.34049	4.42612	2.51176	0.597386
R00525_F	-92.2556	-97.5201	-102.785	-108.049	-113.314	-118.578	-123.843	-129.107
R00525_R	20.998	19.0836	17.1692	15.2549	13.3405	11.4261	9.51176	7.59739
R00526_F	-94.2556	-99.5201	-104.785	-110.049	-115.314	-120.578	-125.843	-131.107
R00526_R	22.998	21.0836	19.1692	17.2549	15.3405	13.4261	11.5118	9.59739
R00527_F	-63.2556	-68.5201	-73.7846	-79.0491	-84.3136	-89.5782	-94.8427	-100.107
R00527_R	-8.00203	-9.9164	-11.8308	-13.7451	-15.6595	-17.5739	-19.4882	-21.4026
R00529_F	-2.90507	-7.691	-12.4769	-17.2628	-22.0488	-26.8347	-31.6206	-36.4065
R00529_R	-92.1051	-96.891	-101.677	-106.463	-111.249	-116.035	-120.821	-125.607
R00530_F	18.9949	14.209	9.42308	4.63716	-0.148765	-4.93469	-9.72061	-14.5065
R00530_R	-114.005	-118.791	-123.577	-128.363	-133.149	-137.935	-142.721	-147.507
R00531_F	-146.056	-151.32	-156.585	-161.849	-167.114	-172.378	-177.643	-182.907
R00531_R	74.798	72.8836	70.9692	69.0549	67.1405	65.2261	63.3118	61.3974
R00533_F	-219.505	-224.291	-229.077	-233.863	-238.649	-243.435	-248.221	-253.007
R00533_R	124.495	119.709	114.923	110.137	105.351	100.565	95.7794	90.9935
R00548_F	-67.9556	-73.2201	-78.4846	-83.7491	-89.0136	-94.2782	-99.5427	-104.807
R00548_R	-3.30203	-5.2164	-7.13077	-9.04514	-10.9595	-12.8739	-14.7882	-16.7026
R00549_F	-67.5051	-72.291	-77.0769	-81.8628	-86.6488	-91.4347	-96.2206	-101.007
R00549_R	-27.5051	-32.291	-37.0769	-41.8628	-46.6488	-51.4347	-56.2206	-61.0065
R00550_F	-54.3051	-59.091	-63.8769	-68.6628	-73.4488	-78.2347	-83.0206	-87.8065
R00550_R	-40.7051	-45.491	-50.2769	-55.0628	-59.8488	-64.6347	-69.4206	-74.2065
R00551_F	-87.2556	-92.5201	-97.7846	-103.049	-108.314	-113.578	-118.843	-124.107
R00551_R	15.998	14.0836	12.1692	10.2549	8.34049	6.42612	4.51176	2.59739
R00552_F	-90.1556	-95.4201	-100.685	-105.949	-111.214	-116.478	-121.743	-127.007
R00552_R	18.898	16.9836	15.0692	13.1549	11.2405	9.32612	7.41176	5.49739
R00554_F	-37.2051	-41.991	-46.7769	-51.5628	-56.3488	-61.1347	-65.9206	-70.7065
R00554_R	-57.8051	-62.591	-67.3769	-72.1628	-76.9488	-81.7347	-86.5206	-91.3065
R00557_F	-1412.77	-1428.56	-1444.35	-1460.15	-1475.94	-1491.73	-1507.53	-1523.32
R00557_R	1032.73	1010.23	987.738	965.245	942.751	920.257	897.763	875.269
R00559_F	-492.505	-497.291	-502.077	-506.863	-511.649	-516.435	-521.221	-526.007
R00559_R	397.495	392.709	387.923	383.137	378.351	373.565	368.779	363.993
R00562_F	-44.2081	-51.8656	-59.5231	-67.1805	-74.838	-82.4955	-90.153	-97.8105
R00562_R	-74.5546	-78.8619	-83.1692	-87.4766	-91.7839	-96.0912	-100.399	-104.706
R00563_F	-70.0081	-77.6656	-85.3231	-92.9805	-100.638	-108.296	-115.953	-123.61
R00563_R	-48.7546	-53.0619	-57.3692	-61.6766	-65.9839	-70.2912	-74.5986	-78.9059
R00565_F	-42.8051	-47.591	-52.3769	-57.1628	-61.9488	-66.7347	-71.5206	-76.3065
R00565_R	-52.2051	-56.991	-61.7769	-66.5628	-71.3488	-76.1347	-80.9206	-85.7065
R00566_F	-56.2556	-61.5201	-66.7846	-72.0491	-77.3136	-82.5782	-87.8427	-93.1072
R00566_R	-15.002	-16.9164	-18.8308	-20.7451	-22.6595	-24.5739	-26.4882	-28.4026
R00567_F	-4.75254	-7.1455	-9.53846	-11.9314	-14.3244	-16.7173	-19.1103	-21.5033
R00567_R	-42.7525	-45.1455	-47.5385	-49.9314	-52.3244	-54.7173	-57.1103	-59.5033
R00568_F	-56.8556	-62.1201	-67.3846	-72.6491	-77.9136	-83.1782	-88.4427	-93.7072
R00568_R	-14.402	-16.3164	-18.2308	-20.1451	-22.0595	-23.9739	-25.8882	-27.8026
R00569_F	-86.8556	-92.1201	-97.3846	-102.649	-107.914	-113.178	-118.443	-123.707
R00569_R	15.598	13.6836	11.7692	9.85486	7.94049	6.02612	4.11176	2.19739
R00570_F	-48.6051	-53.391	-58.1769	-62.9628	-67.7488	-72.5347	-77.3206	-82.1065
R00570_R	-46.4051	-51.191	-55.9769	-60.7628	-65.5488	-70.3347	-75.1206	-79.9065
R00571_F	-102.358	-109.536	-116.715	-123.894	-131.073	-138.252	-145.431	-152.61
R00571_R	-40.1576	-47.3365	-54.5154	-61.6943	-68.8731	-76.052	-83.2309	-90.4098
R00572_F	-16.2051	-20.991	-25.7769	-30.5628	-35.3488	-40.1347	-44.9206	-49.7065
R00572_R	-78.8051	-83.591	-88.3769	-93.1628	-97.9488	-102.735	-107.521	-112.307
R00573_F	-147.161	-157.211	-167.262	-177.312	-187.362	-197.413	-207.463	-217.514
R00573_R	-19.1071	-25.8074	-32.5077	-39.208	-45.9083	-52.6086	-59.3089	-66.0091
R00574_F	-58.0556	-63.3201	-68.5846	-73.8491	-79.1136	-84.3782	-89.6427	-94.9072
R00574_R	-13.202	-15.1164	-17.0308	-18.9451	-20.8595	-22.7739	-24.6882	-26.6026
R00575_F	-141.113	-153.557	-166	-178.443	-190.887	-203.33	-215.774	-228.217
R00575_R	-72.6596	-81.7529	-90.8461	-99.9394	-109.033	-118.126	-127.219	-136.312
R00576_F	-49.3051	-54.091	-58.8769	-63.6628	-68.4488	-73.2347	-78.0206	-82.8065
R00576_R	-45.7051	-50.491	-55.2769	-60.0628	-64.8488	-69.6347	-74.4206	-79.2065
R00578_F	-142.761	-152.811	-162.862	-172.912	-182.962	-193.013	-203.063	-213.114
R00578_R	-23.5071	-30.2074	-36.9077	-43.608	-50.3083	-57.0086	-63.7089	-70.4091
R00579_F	-16.9525	-19.3455	-21.7385	-24.1314	-26.5244	-28.9173	-31.3103	-33.7033
R00579_R	-30.5525	-32.9455	-35.3385	-37.7314	-40.1244	-42.5173	-44.9103	-47.3033
R00581_F	-27.9081	-35.5656	-43.2231	-50.8805	-58.538	-66.1955	-73.853	-81.5105
R00581_R	-90.8546	-95.1619	-99.4692	-103.777	-108.084	-112.391	-116.699	-121.006
R00582_F	-66.9656	-72.2301	-77.4946	-82.7591	-88.0236	-93.2882	-98.5527	-103.817
R00582_R	-4.29203	-6.2064	-8.12077	-10.0351	-11.9495	-13.8639	-15.7782	-17.6926
R00584_F	-46.6351	-51.421	-56.2069	-60.9928	-65.7788	-70.5647	-75.3506	-80.1365
R00584_R	-48.3751	-53.161	-57.9469	-62.7328	-67.5188	-72.3047	-77.0906	-81.8765
R00585_F	-34.0051	-38.791	-43.5769	-48.3628	-53.1488	-57.9347	-62.7206	-67.5065
R00585_R	-61.0051	-65.791	-70.5769	-75.3628	-80.1488	-84.9347	-89.7206	-94.5065
R00586_F	-49.8051	-54.591	-59.3769	-64.1628	-68.9488	-73.7347	-78.5206	-83.3065
R00586_R	-45.2051	-49.991	-54.7769	-59.5628	-64.3488	-69.1347	-73.9206	-78.7065
R00588_F	-57.7051	-62.491	-67.2769	-72.0628	-76.8488	-81.6347	-86.4206	-91.2065
R00588_R	-37.3051	-42.091	-46.8769	-51.6628	-56.4488	-61.2347	-66.0206	-70.8065
R00589_F	-25.1525	-27.5455	-29.9385	-32.3314	-34.7244	-37.1173	-39.5103	-41.9033
R00589_R	-22.3525	-24.7455	-27.1385	-29.5314	-31.9244	-34.3173	-36.7103	-39.1033
R00590_F	-29.3525	-31.7455	-34.1385	-36.5314	-38.9244	-41.3173	-43.7103	-46.1033
R00590_R	-18.1525	-20.5455	-22.9385	-25.3314	-27.7244	-30.1173	-32.5103	-34.9033
R00602_F	-310.002	-311.916	-313.831	-315.745	-317.66	-319.574	-321.488	-323.403
R00602_R	238.744	233.48	228.215	222.951	217.686	212.422	207.157	201.893
R00604_F	-88.3051	-93.091	-97.8769	-102.663	-107.449	-112.235	-117.021	-121.807
R00604_R	-6.70507	-11.491	-16.2769	-21.0628	-25.8488	-30.6347	-35.4206	-40.2065
R00605_F	-5.40507	-10.191	-14.9769	-19.7628	-24.5488	-29.3347	-34.1206	-38.9065
R00605_R	-89.6051	-94.391	-99.1769	-103.963	-108.749	-113.535	-118.321	-123.107
R00608_F	-146.505	-151.291	-156.077	-160.863	-165.649	-170.435	-175.221	-180.007
R00608_R	51.4949	46.709	41.9231	37.1372	32.3512	27.5653	22.7794	17.9935
R00610_F	-152.008	-159.666	-167.323	-174.981	-182.638	-190.296	-197.953	-205.61
R00610_R	33.2454	28.9381	24.6308	20.3234	16.0161	11.7088	7.40145	3.09412
R00612_F	-141.008	-148.666	-156.323	-163.981	-171.638	-179.296	-186.953	-194.61
R00612_R	22.2454	17.9381	13.6308	9.32344	5.01611	0.70878	-3.59855	-7.90588
R00614_F	-130.505	-135.291	-140.077	-144.863	-149.649	-154.435	-159.221	-164.007
R00614_R	35.4949	30.709	25.9231	21.1372	16.3512	11.5653	6.77939	1.99347
R00616_F	-34.2051	-38.991	-43.7769	-48.5628	-53.3488	-58.1347	-62.9206	-67.7065
R00616_R	-60.8051	-65.591	-70.3769	-75.1628	-79.9488	-84.7347	-89.5206	-94.3065
R00618_F	-101.256	-106.52	-111.785	-117.049	-122.314	-127.578	-132.843	-138.107
R00618_R	29.998	28.0836	26.1692	24.2549	22.3405	20.4261	18.5118	16.5974
R00619_F	-33.4051	-38.191	-42.9769	-47.7628	-52.5488	-57.3347	-62.1206	-66.9065
R00619_R	-61.6051	-66.391	-71.1769	-75.9628	-80.7488	-85.5347	-90.3206	-95.1065
R00621_F	-66.5051	-71.291	-76.0769	-80.8628	-85.6488	-90.4347	-95.2206	-100.007
R00621_R	-28.5051	-33.291	-38.0769	-42.8628	-47.6488	-52.4347	-57.2206	-62.0065
R00647_F	-23.7487	-26.1417	-28.5347	-30.9276	-33.3206	-35.7135	-38.1065	-40.4995
R00647_R	-23.7563	-26.1493	-28.5423	-30.9352	-33.3282	-35.7211	-38.1141	-40.5071
R00648_F	-182.008	-189.666	-197.323	-204.981	-212.638	-220.296	-227.953	-235.61
R00648_R	63.2454	58.9381	54.6308	50.3234	46.0161	41.7088	37.4014	33.0941
R00649_F	-48.5051	-53.291	-58.0769	-62.8628	-67.6488	-72.4347	-77.2206	-82.0065
R00649_R	-46.5051	-51.291	-56.0769	-60.8628	-65.6488	-70.4347	-75.2206	-80.0065
R00651_F	-109.105	-113.891	-118.677	-123.463	-128.249	-133.035	-137.821	-142.607
R00651_R	14.0949	9.309	4.52308	-0.262842	-5.04877	-9.83469	-14.6206	-19.4065
R00652_F	-71.1051	-75.891	-80.6769	-85.4628	-90.2488	-95.0347	-99.8206	-104.607
R00652_R	-23.9051	-28.691	-33.4769	-38.2628	-43.0488	-47.8347	-52.6206	-57.4065
R00653_F	-81.2556	-86.5201	-91.7846	-97.0491	-102.314	-107.578	-112.843	-118.107
R00653_R	9.99797	8.0836	6.16923	4.25486	2.34049	0.426125	-1.48824	-3.40261
R00654_F	-91.7586	-99.8947	-108.031	-116.167	-124.303	-132.439	-140.575	-148.711
R00654_R	-3.25152	-4.6873	-6.12308	-7.55885	-8.99463	-10.4304	-11.8662	-13.302
R00655_F	-26.1525	-28.5455	-30.9385	-33.3314	-35.7244	-38.1173	-40.5103	-42.9033
R00655_R	-21.3525	-23.7455	-26.1385	-28.5314	-30.9244	-33.3173	-35.7103	-38.1033
R00656_F	-76.0556	-81.3201	-86.5846	-91.8491	-97.1136	-102.378	-107.643	-112.907
R00656_R	4.79797	2.8836	0.969232	-0.945137	-2.85951	-4.77388	-6.68824	-8.60261
R00658_F	-28.1425	-30.5355	-32.9285	-35.3214	-37.7144	-40.1073	-42.5003	-44.8933
R00658_R	-19.3625	-21.7555	-24.1485	-26.5414	-28.9344	-31.3273	-33.7203	-36.1133
R00659_F	-27.6051	-32.391	-37.1769	-41.9628	-46.7488	-51.5347	-56.3206	-61.1065
R00659_R	-67.4051	-72.191	-76.9769	-81.7628	-86.5488	-91.3347	-96.1206	-100.907
R00660_F	-57.5051	-62.291	-67.0769	-71.8628	-76.6488	-81.4347	-86.2206	-91.0065
R00660_R	-37.5051	-42.291	-47.0769	-51.8628	-56.6488	-61.4347	-66.2206	-71.0065
R00661_F	-4.25254	-6.6455	-9.03846	-11.4314	-13.8244	-16.2173	-18.6103	-21.0033
R00661_R	-43.2525	-45.6455	-48.0385	-50.4314	-52.8244	-55.2173	-57.6103	-60.0033
R00662_F	-117.256	-122.52	-127.785	-133.049	-138.314	-143.578	-148.843	-154.107
R00662_R	45.998	44.0836	42.1692	40.2549	38.3405	36.4261	34.5118	32.5974
R00664_F	-161.258	-168.436	-175.615	-182.794	-189.973	-197.152	-204.331	-211.51
R00664_R	18.7424	11.5635	4.38462	-2.79426	-9.97315	-17.152	-24.3309	-31.5098
R00665_F	-105.759	-113.895	-122.031	-130.167	-138.303	-146.439	-154.575	-162.711
R00665_R	10.7485	9.3127	7.87692	6.44115	5.00537	3.56959	2.13382	0.69804
R00666_F	-44.0081	-51.6656	-59.3231	-66.9805	-74.638	-82.2955	-89.953	-97.6105
R00666_R	-74.7546	-79.0619	-83.3692	-87.6766	-91.9839	-96.2912	-100.599	-104.906
R00667_F	-46.5051	-51.291	-56.0769	-60.8628	-65.6488	-70.4347	-75.2206	-80.0065
R00667_R	-48.5051	-53.291	-58.0769	-62.8628	-67.6488	-72.4347	-77.2206	-82.0065
R00668_F	-80.5051	-85.291	-90.0769	-94.8628	-99.6488	-104.435	-109.221	-114.007
R00668_R	-14.5051	-19.291	-24.0769	-28.8628	-33.6488	-38.4347	-43.2206	-48.0065
R00669_F	-62.5556	-67.8201	-73.0846	-78.3491	-83.6136	-88.8782	-94.1427	-99.4072
R00669_R	-8.70203	-10.6164	-12.5308	-14.4451	-16.3595	-18.2739	-20.1882	-22.1026
R00670_F	-81.2556	-86.5201	-91.7846	-97.0491	-102.314	-107.578	-112.843	-118.107
R00670_R	9.99797	8.0836	6.16923	4.25486	2.34049	0.426125	-1.48824	-3.40261
R00671_F	-75.2556	-80.5201	-85.7846	-91.0491	-96.3136	-101.578	-106.843	-112.107
R00671_R	3.99797	2.0836	0.169232	-1.74514	-3.65951	-5.57388	-7.48824	-9.40261
R00672_F	-33.7525	-36.1455	-38.5385	-40.9314	-43.3244	-45.7173	-48.1103	-50.5033
R00672_R	-13.7525	-16.1455	-18.5385	-20.9314	-23.3244	-25.7173	-28.1103	-30.5033
R00673_F	-68.7586	-76.8947	-85.0308	-93.1668	-101.303	-109.439	-117.575	-125.711
R00673_R	-26.2515	-27.6873	-29.1231	-30.5589	-31.9946	-33.4304	-34.8662	-36.302
R00674_F	-71.902	-73.8164	-75.7308	-77.6451	-79.5595	-81.4739	-83.3882	-85.3026
R00674_R	0.64442	-4.6201	-9.88461	-15.1491	-20.4136	-25.6782	-30.9427	-36.2072
R00675_F	-73.0081	-80.6656	-88.3231	-95.9805	-103.638	-111.296	-118.953	-126.61
R00675_R	-45.7546	-50.0619	-54.3692	-58.6766	-62.9839	-67.2912	-71.5986	-75.9059
R00676_F	-83.0081	-90.6656	-98.3231	-105.981	-113.638	-121.296	-128.953	-136.61
R00676_R	-35.7546	-40.0619	-44.3692	-48.6766	-52.9839	-57.2912	-61.5986	-65.9059
R00677_F	-214.008	-221.666	-229.323	-236.981	-244.638	-252.296	-259.953	-267.61
R00677_R	95.2454	90.9381	86.6308	82.3234	78.0161	73.7088	69.4014	65.0941
R00678_F	-358.002	-359.916	-361.831	-363.745	-365.66	-367.574	-369.488	-371.403
R00678_R	286.744	281.48	276.215	270.951	265.686	260.422	255.157	249.893
R00679_F	-523.505	-528.291	-533.077	-537.863	-542.649	-547.435	-552.221	-557.007
R00679_R	428.495	423.709	418.923	414.137	409.351	404.565	399.779	394.993
R00681_F	-468.008	-475.666	-483.323	-490.981	-498.638	-506.296	-513.953	-521.61
R00681_R	349.245	344.938	340.631	336.323	332.016	327.709	323.401	319.094
R00684_F	-85.5051	-90.291	-95.0769	-99.8628	-104.649	-109.435	-114.221	-119.007
R00684_R	-9.50507	-14.291	-19.0769	-23.8628	-28.6488	-33.4347	-38.2206	-43.0065
R00685_F	-85.2556	-90.5201	-95.7846	-101.049	-106.314	-111.578	-116.843	-122.107
R00685_R	13.998	12.0836	10.1692	8.25486	6.34049	4.42612	2.51176	0.597386
R00686_F	-131.008	-138.666	-146.323	-153.981	-161.638	-169.296	-176.953	-184.61
R00686_R	12.2454	7.9381	3.63077	-0.676558	-4.98389	-9.29122	-13.5986	-17.9059
R00688_F	-29.8081	-37.4656	-45.1231	-52.7805	-60.438	-68.0955	-75.753	-83.4105
R00688_R	-88.9546	-93.2619	-97.5692	-101.877	-106.184	-110.491	-114.799	-119.106
R00689_F	-171.008	-178.666	-186.323	-193.981	-201.638	-209.296	-216.953	-224.61
R00689_R	52.2454	47.9381	43.6308	39.3234	35.0161	30.7088	26.4014	22.0941
R00690_F	-516.505	-521.291	-526.077	-530.863	-535.649	-540.435	-545.221	-550.007
R00690_R	421.495	416.709	411.923	407.137	402.351	397.565	392.779	387.993
R00691_F	-130.256	-135.52	-140.785	-146.049	-151.314	-156.578	-161.843	-167.107
R00691_R	58.998	57.0836	55.1692	53.2549	51.3405	49.4261	47.5118	45.5974
R00692_F	-35.9051	-40.691	-45.4769	-50.2628	-55.0488	-59.8347	-64.6206	-69.4065
R00692_R	-59.1051	-63.891	-68.6769	-73.4628	-78.2488	-83.0347	-87.8206	-92.6065
R00693_F	-73.5051	-78.291	-83.0769	-87.8628	-92.6488	-97.4347	-102.221	-107.007
R00693_R	-21.5051	-26.291	-31.0769	-35.8628	-40.6488	-45.4347	-50.2206	-55.0065
R00694_F	-41.6051	-46.391	-51.1769	-55.9628	-60.7488	-65.5347	-70.3206	-75.1065
R00694_R	-53.4051	-58.191	-62.9769	-67.7628	-72.5488	-77.3347	-82.1206	-86.9065
R00695_F	-48.5051	-53.291	-58.0769	-62.8628	-67.6488	-72.4347	-77.2206	-82.0065
R00695_R	-46.5051	-51.291	-56.0769	-60.8628	-65.6488	-70.4347	-75.2206	-80.0065
R00697_F	-55.1556	-60.4201	-65.6846	-70.9491	-76.2136	-81.4782	-86.7427	-92.0072
R00697_R	-16.102	-18.0164	-19.9308	-21.8451	-23.7595	-25.6739	-27.5882	-29.5026
R00699_F	-79.2556	-84.5201	-89.7846	-95.0491	-100.314	-105.578	-110.843	-116.107
R00699_R	7.99797	6.0836	4.16923	2.25486	0.340494	-1.57388	-3.48824	-5.40261
R00700_F	-46.002	-47.9164	-49.8308	-51.7451	-53.6595	-55.5739	-57.4882	-59.4026
R00700_R	-25.2556	-30.5201	-35.7846	-41.0491	-46.3136	-51.5782	-56.8427	-62.1072
R00702_F	-233.505	-238.291	-243.077	-247.863	-252.649	-257.435	-262.221	-267.007
R00702_R	138.495	133.709	128.923	124.137	119.351	114.565	109.779	104.993
R00703_F	-22.3051	-27.091	-31.8769	-36.6628	-41.4488	-46.2347	-51.0206	-55.8065
R00703_R	-72.7051	-77.491	-82.2769	-87.0628	-91.8488	-96.6347	-101.421	-106.207
R00704_F	-20.7051	-25.491	-30.2769	-35.0628	-39.8488	-44.6347	-49.4206	-54.2065
R00704_R	-74.3051	-79.091	-83.8769	-88.6628	-93.4488	-98.2347	-103.021	-107.807
R00705_F	-91.2576	-98.4365	-105.615	-112.794	-119.973	-127.152	-134.331	-141.51
R00705_R	-51.2576	-58.4365	-65.6154	-72.7943	-79.9731	-87.152	-94.3309	-101.51
R00706_F	-101.258	-108.436	-115.615	-122.794	-129.973	-137.152	-144.331	-151.51
R00706_R	-41.2576	-48.4365	-55.6154	-62.7943	-69.9731	-77.152	-84.3309	-91.5098
R00707_F	-82.5051	-87.291	-92.0769	-96.8628	-101.649	-106.435	-111.221	-116.007
R00707_R	-12.5051	-17.291	-22.0769	-26.8628	-31.6488	-36.4347	-41.2206	-46.0065
R00708_F	-91.5051	-96.291	-101.077	-105.863	-110.649	-115.435	-120.221	-125.007
R00708_R	-3.50507	-8.291	-13.0769	-17.8628	-22.6488	-27.4347	-32.2206	-37.0065
R00709_F	-63.2081	-70.8656	-78.5231	-86.1805	-93.838	-101.496	-109.153	-116.81
R00709_R	-55.5546	-59.8619	-64.1692	-68.4766	-72.7839	-77.0912	-81.3986	-85.7059
R00710_F	-92.3051	-97.091	-101.877	-106.663	-111.449	-116.235	-121.021	-125.807
R00710_R	-2.70507	-7.491	-12.2769	-17.0628	-21.8488	-26.6347	-31.4206	-36.2065
R00711_F	-101.905	-106.691	-111.477	-116.263	-121.049	-125.835	-130.621	-135.407
R00711_R	6.89493	2.109	-2.67692	-7.46284	-12.2488	-17.0347	-21.8206	-26.6065
R00713_F	-81.7051	-86.491	-91.2769	-96.0628	-100.849	-105.635	-110.421	-115.207
R00713_R	-13.3051	-18.091	-22.8769	-27.6628	-32.4488	-37.2347	-42.0206	-46.8065
R00714_F	-91.3051	-96.091	-100.877	-105.663	-110.449	-115.235	-120.021	-124.807
R00714_R	-3.70507	-8.491	-13.2769	-18.0628	-22.8488	-27.6347	-32.4206	-37.2065
R00715_F	-31.6081	-39.2656	-46.9231	-54.5805	-62.238	-69.8955	-77.553	-85.2105
R00715_R	-87.1546	-91.4619	-95.7692	-100.077	-104.384	-108.691	-112.999	-117.306
R00716_F	-41.2081	-48.8656	-56.5231	-64.1805	-71.838	-79.4955	-87.153	-94.8105
R00716_R	-77.5546	-81.8619	-86.1692	-90.4766	-94.7839	-99.0912	-103.399	-107.706
R00717_F	10.2949	5.509	0.723081	-4.06284	-8.84877	-13.6347	-18.4206	-23.2065
R00717_R	-105.305	-110.091	-114.877	-119.663	-124.449	-129.235	-134.021	-138.807
R00719_F	-91.7556	-97.0201	-102.285	-107.549	-112.814	-118.078	-123.343	-128.607
R00719_R	20.498	18.5836	16.6692	14.7549	12.8405	10.9261	9.01176	7.09739
R00720_F	-87.0556	-92.3201	-97.5846	-102.849	-108.114	-113.378	-118.643	-123.907
R00720_R	15.798	13.8836	11.9692	10.0549	8.14049	6.22612	4.31176	2.39739
R00722_F	-43.7051	-48.491	-53.2769	-58.0628	-62.8488	-67.6347	-72.4206	-77.2065
R00722_R	-51.3051	-56.091	-60.8769	-65.6628	-70.4488	-75.2347	-80.0206	-84.8065
R00723_F	-163.256	-168.52	-173.785	-179.049	-184.314	-189.578	-194.843	-200.107
R00723_R	91.998	90.0836	88.1692	86.2549	84.3405	82.4261	80.5118	78.5974
R00724_F	-21.2051	-25.991	-30.7769	-35.5628	-40.3488	-45.1347	-49.9206	-54.7065
R00724_R	-73.8051	-78.591	-83.3769	-88.1628	-92.9488	-97.7347	-102.521	-107.307
R00725_F	-72.8051	-77.591	-82.3769	-87.1628	-91.9488	-96.7347	-101.521	-106.307
R00725_R	-22.2051	-26.991	-31.7769	-36.5628	-41.3488	-46.1347	-50.9206	-55.7065
R00726_F	-69.4081	-77.0656	-84.7231	-92.3805	-100.038	-107.696	-115.353	-123.01
R00726_R	-49.3546	-53.6619	-57.9692	-62.2766	-66.5839	-70.8912	-75.1986	-79.5059
R00727_F	-84.0576	-91.2365	-98.4154	-105.594	-112.773	-119.952	-127.131	-134.31
R00727_R	-58.4576	-65.6365	-72.8154	-79.9943	-87.1731	-94.352	-101.531	-108.71
R00728_F	-117.759	-125.895	-134.031	-142.167	-150.303	-158.439	-166.575	-174.711
R00728_R	22.7485	21.3127	19.8769	18.4411	17.0054	15.5696	14.1338	12.698
R00729_F	-173.008	-180.666	-188.323	-195.981	-203.638	-211.296	-218.953	-226.61
R00729_R	54.2454	49.9381	45.6308	41.3234	37.0161	32.7088	28.4014	24.0941
R00731_F	-447.002	-448.916	-450.831	-452.745	-454.66	-456.574	-458.488	-460.403
R00731_R	375.744	370.48	365.215	359.951	354.686	349.422	344.157	338.893
R00732_F	-90.0081	-97.6656	-105.323	-112.981	-120.638	-128.296	-135.953	-143.61
R00732_R	-28.7546	-33.0619	-37.3692	-41.6766	-45.9839	-50.2912	-54.5986	-58.9059
R00733_F	-99.0081	-106.666	-114.323	-121.981	-129.638	-137.296	-144.953	-152.61
R00733_R	-19.7546	-24.0619	-28.3692	-32.6766	-36.9839	-41.2912	-45.5986	-49.9059
R00734_F	-43.7051	-48.491	-53.2769	-58.0628	-62.8488	-67.6347	-72.4206	-77.2065
R00734_R	-51.3051	-56.091	-60.8769	-65.6628	-70.4488	-75.2347	-80.0206	-84.8065
R00735_F	-153.258	-160.436	-167.615	-174.794	-181.973	-189.152	-196.331	-203.51
R00735_R	10.7424	3.56351	-3.61538	-10.7943	-17.9731	-25.152	-32.3309	-39.5098
R00736_F	-121.256	-126.52	-131.785	-137.049	-142.314	-147.578	-152.843	-158.107
R00736_R	49.998	48.0836	46.1692	44.2549	42.3405	40.4261	38.5118	36.5974
R00737_F	-90.2556	-95.5201	-100.785	-106.049	-111.314	-116.578	-121.843	-127.107
R00737_R	18.998	17.0836	15.1692	13.2549	11.3405	9.42612	7.51176	5.59739
R00739_F	-71.7525	-74.1455	-76.5385	-78.9314	-81.3244	-83.7173	-86.1103	-88.5033
R00739_R	24.2475	21.8545	19.4615	17.0686	14.6756	12.2827	9.88969	7.49673
R00740_F	-58.7546	-63.0619	-67.3692	-71.6766	-75.9839	-80.2912	-84.5986	-88.9059
R00740_R	-60.0081	-67.6656	-75.3231	-82.9805	-90.638	-98.2955	-105.953	-113.61
R00742_F	-88.1576	-95.3365	-102.515	-109.694	-116.873	-124.052	-131.231	-138.41
R00742_R	-54.3576	-61.5365	-68.7154	-75.8943	-83.0731	-90.252	-97.4309	-104.61
R00743_F	-53.8051	-58.591	-63.3769	-68.1628	-72.9488	-77.7347	-82.5206	-87.3065
R00743_R	-41.2051	-45.991	-50.7769	-55.5628	-60.3488	-65.1347	-69.9206	-74.7065
R00744_F	17.3949	12.609	7.82308	3.03716	-1.74877	-6.53469	-11.3206	-16.1065
R00744_R	-112.405	-117.191	-121.977	-126.763	-131.549	-136.335	-141.121	-145.907
R00746_F	-27.4051	-32.191	-36.9769	-41.7628	-46.5488	-51.3347	-56.1206	-60.9065
R00746_R	-67.6051	-72.391	-77.1769	-81.9628	-86.7488	-91.5347	-96.3206	-101.107
R00747_F	-140.256	-145.52	-150.785	-156.049	-161.314	-166.578	-171.843	-177.107
R00747_R	68.998	67.0836	65.1692	63.2549	61.3405	59.4261	57.5118	55.5974
R00748_F	-127.559	-135.695	-143.831	-151.967	-160.103	-168.239	-176.375	-184.511
R00748_R	32.5485	31.1127	29.6769	28.2411	26.8054	25.3696	23.9338	22.498
R00749_F	-88.2556	-93.5201	-98.7846	-104.049	-109.314	-114.578	-119.843	-125.107
R00749_R	16.998	15.0836	13.1692	11.2549	9.34049	7.42612	5.51176	3.59739
R00750_F	-19.302	-21.2164	-23.1308	-25.0451	-26.9595	-28.8739	-30.7882	-32.7026
R00750_R	-51.9556	-57.2201	-62.4846	-67.7491	-73.0136	-78.2782	-83.5427	-88.8072
R00751_F	-47.7556	-53.0201	-58.2846	-63.5491	-68.8136	-74.0782	-79.3427	-84.6072
R00751_R	-23.502	-25.4164	-27.3308	-29.2451	-31.1595	-33.0739	-34.9882	-36.9026
R00753_F	-30.3556	-35.6201	-40.8846	-46.1491	-51.4136	-56.6782	-61.9427	-67.2072
R00753_R	-40.902	-42.8164	-44.7308	-46.6451	-48.5595	-50.4739	-52.3882	-54.3026
R00754_F	-17.8351	-22.621	-27.4069	-32.1928	-36.9788	-41.7647	-46.5506	-51.3365
R00754_R	-77.1751	-81.961	-86.7469	-91.5328	-96.3188	-101.105	-105.891	-110.677
R00755_F	-31.902	-33.8164	-35.7308	-37.6451	-39.5595	-41.4739	-43.3882	-45.3026
R00755_R	-39.3556	-44.6201	-49.8846	-55.1491	-60.4136	-65.6782	-70.9427	-76.2072
R00756_F	-58.9051	-63.691	-68.4769	-73.2628	-78.0488	-82.8347	-87.6206	-92.4065
R00756_R	-36.1051	-40.891	-45.6769	-50.4628	-55.2488	-60.0347	-64.8206	-69.6065
R00758_F	-38.7051	-43.491	-48.2769	-53.0628	-57.8488	-62.6347	-67.4206	-72.2065
R00758_R	-56.3051	-61.091	-65.8769	-70.6628	-75.4488	-80.2347	-85.0206	-89.8065
R00760_F	-70.6051	-75.391	-80.1769	-84.9628	-89.7488	-94.5347	-99.3206	-104.107
R00760_R	-24.4051	-29.191	-33.9769	-38.7628	-43.5488	-48.3347	-53.1206	-57.9065
R00761_F	-81.2051	-85.991	-90.7769	-95.5628	-100.349	-105.135	-109.921	-114.707
R00761_R	-13.8051	-18.591	-23.3769	-28.1628	-32.9488	-37.7347	-42.5206	-47.3065
R00762_F	-76.6556	-81.9201	-87.1846	-92.4491	-97.7136	-102.978	-108.243	-113.507
R00762_R	5.39797	3.4836	1.56923	-0.345137	-2.25951	-4.17388	-6.08824	-8.00261
R00763_F	-116.856	-122.12	-127.385	-132.649	-137.914	-143.178	-148.443	-153.707
R00763_R	45.598	43.6836	41.7692	39.8549	37.9405	36.0261	34.1118	32.1974
R00764_F	-37.0051	-41.791	-46.5769	-51.3628	-56.1488	-60.9347	-65.7206	-70.5065
R00764_R	-58.0051	-62.791	-67.5769	-72.3628	-77.1488	-81.9347	-86.7206	-91.5065
R00765_F	-62.4556	-67.7201	-72.9846	-78.2491	-83.5136	-88.7782	-94.0427	-99.3072
R00765_R	-8.80203	-10.7164	-12.6308	-14.5451	-16.4595	-18.3739	-20.2882	-22.2026
R00766_F	-49.5051	-54.291	-59.0769	-63.8628	-68.6488	-73.4347	-78.2206	-83.0065
R00766_R	-45.5051	-50.291	-55.0769	-59.8628	-64.6488	-69.4347	-74.2206	-79.0065
R00767_F	-57.7051	-62.491	-67.2769	-72.0628	-76.8488	-81.6347	-86.4206	-91.2065
R00767_R	-37.3051	-42.091	-46.8769	-51.6628	-56.4488	-61.2347	-66.0206	-70.8065
R00768_F	-53.6051	-58.391	-63.1769	-67.9628	-72.7488	-77.5347	-82.3206	-87.1065
R00768_R	-41.4051	-46.191	-50.9769	-55.7628	-60.5488	-65.3347	-70.1206	-74.9065
R00769_F	-69.1051	-73.891	-78.6769	-83.4628	-88.2488	-93.0347	-97.8206	-102.607
R00769_R	-25.9051	-30.691	-35.4769	-40.2628	-45.0488	-49.8347	-54.6206	-59.4065
R00770_F	-62.6051	-67.391	-72.1769	-76.9628	-81.7488	-86.5347	-91.3206	-96.1065
R00770_R	-32.4051	-37.191	-41.9769	-46.7628	-51.5488	-56.3347	-61.1206	-65.9065
R00771_F	-25.4525	-27.8455	-30.2385	-32.6314	-35.0244	-37.4173	-39.8103	-42.2033
R00771_R	-22.0525	-24.4455	-26.8385	-29.2314	-31.6244	-34.0173	-36.4103	-38.8033
R00772_F	-38.3525	-40.7455	-43.1385	-45.5314	-47.9244	-50.3173	-52.7103	-55.1033
R00772_R	-9.15254	-11.5455	-13.9385	-16.3314	-18.7244	-21.1173	-23.5103	-25.9033
R00774_F	-47.2576	-54.4365	-61.6154	-68.7943	-75.9731	-83.152	-90.3309	-97.5098
R00774_R	-95.2576	-102.436	-109.615	-116.794	-123.973	-131.152	-138.331	-145.51
R00775_F	-91.2556	-96.5201	-101.785	-107.049	-112.314	-117.578	-122.843	-128.107
R00775_R	19.998	18.0836	16.1692	14.2549	12.3405	10.4261	8.51176	6.59739
R00776_F	-48.5556	-53.8201	-59.0846	-64.3491	-69.6136	-74.8782	-80.1427	-85.4072
R00776_R	-22.702	-24.6164	-26.5308	-28.4451	-30.3595	-32.2739	-34.1882	-36.1026
R00777_F	-123.256	-128.52	-133.785	-139.049	-144.314	-149.578	-154.843	-160.107
R00777_R	51.998	50.0836	48.1692	46.2549	44.3405	42.4261	40.5118	38.5974
R00781_F	-366.002	-367.916	-369.831	-371.745	-373.66	-375.574	-377.488	-379.403
R00781_R	294.744	289.48	284.215	278.951	273.686	268.422	263.157	257.893
R00782_F	-95.7586	-103.895	-112.031	-120.167	-128.303	-136.439	-144.575	-152.711
R00782_R	0.748478	-0.687299	-2.12308	-3.55885	-4.99463	-6.43041	-7.86618	-9.30196
R00794_F	105.495	100.709	95.9231	91.1372	86.3512	81.5653	76.7794	71.9935
R00794_R	-200.505	-205.291	-210.077	-214.863	-219.649	-224.435	-229.221	-234.007
R00796_F	95.4949	90.709	85.9231	81.1372	76.3512	71.5653	66.7794	61.9935
R00796_R	-190.505	-195.291	-200.077	-204.863	-209.649	-214.435	-219.221	-224.007
R00800_F	-211.755	-216.062	-220.369	-224.677	-228.984	-233.291	-237.599	-241.906
R00800_R	92.9919	85.3344	77.6769	70.0195	62.362	54.7045	47.047	39.3895
R00801_F	-76.9556	-82.2201	-87.4846	-92.7491	-98.0136	-103.278	-108.543	-113.807
R00801_R	5.69797	3.7836	1.86923	-0.0451369	-1.95951	-3.87388	-5.78824	-7.70261
R00802_F	-73.9556	-79.2201	-84.4846	-89.7491	-95.0136	-100.278	-105.543	-110.807
R00802_R	2.69797	0.783602	-1.13077	-3.04514	-4.95951	-6.87388	-8.78824	-10.7026
R00803_F	-49.7051	-54.491	-59.2769	-64.0628	-68.8488	-73.6347	-78.4206	-83.2065
R00803_R	-45.3051	-50.091	-54.8769	-59.6628	-64.4488	-69.2347	-74.0206	-78.8065
R00805_F	-79.0556	-84.3201	-89.5846	-94.8491	-100.114	-105.378	-110.643	-115.907
R00805_R	7.79797	5.8836	3.96923	2.05486	0.140494	-1.77388	-3.68824	-5.60261
R00806_F	-63.7051	-68.491	-73.2769	-78.0628	-82.8488	-87.6347	-92.4206	-97.2065
R00806_R	-31.3051	-36.091	-40.8769	-45.6628	-50.4488	-55.2347	-60.0206	-64.8065
R00807_F	-69.5051	-74.291	-79.0769	-83.8628	-88.6488	-93.4347	-98.2206	-103.007
R00807_R	-25.5051	-30.291	-35.0769	-39.8628	-44.6488	-49.4347	-54.2206	-59.0065
R00809_F	-84.5051	-89.291	-94.0769	-98.8628	-103.649	-108.435	-113.221	-118.007
R00809_R	-10.5051	-15.291	-20.0769	-24.8628	-29.6488	-34.4347	-39.2206	-44.0065
R00810_F	-43.4525	-45.8455	-48.2385	-50.6314	-53.0244	-55.4173	-57.8103	-60.2033
R00810_R	-4.05254	-6.4455	-8.83846	-11.2314	-13.6244	-16.0173	-18.4103	-20.8033
R00812_F	-120.505	-125.291	-130.077	-134.863	-139.649	-144.435	-149.221	-154.007
R00812_R	25.4949	20.709	15.9231	11.1372	6.35123	1.56531	-3.22061	-8.00653
R00813_F	-159.008	-166.666	-174.323	-181.981	-189.638	-197.296	-204.953	-212.61
R00813_R	40.2454	35.9381	31.6308	27.3234	23.0161	18.7088	14.4014	10.0941
R00814_F	-129.505	-134.291	-139.077	-143.863	-148.649	-153.435	-158.221	-163.007
R00814_R	34.4949	29.709	24.9231	20.1372	15.3512	10.5653	5.77939	0.993465
R00815_F	-484.755	-489.062	-493.369	-497.677	-501.984	-506.291	-510.599	-514.906
R00815_R	365.992	358.334	350.677	343.019	335.362	327.704	320.047	312.39
R00816_F	-278.002	-279.916	-281.831	-283.745	-285.66	-287.574	-289.488	-291.403
R00816_R	206.744	201.48	196.215	190.951	185.686	180.422	175.157	169.893
R00817_F	-332.002	-333.916	-335.831	-337.745	-339.66	-341.574	-343.488	-345.403
R00817_R	260.744	255.48	250.215	244.951	239.686	234.422	229.157	223.893
R00818_F	-533.258	-540.436	-547.615	-554.794	-561.973	-569.152	-576.331	-583.51
R00818_R	390.742	383.564	376.385	369.206	362.027	354.848	347.669	340.49
R00821_F	-62.0556	-67.3201	-72.5846	-77.8491	-83.1136	-88.3782	-93.6427	-98.9072
R00821_R	-9.20203	-11.1164	-13.0308	-14.9451	-16.8595	-18.7739	-20.6882	-22.6026
R00822_F	-63.2556	-68.5201	-73.7846	-79.0491	-84.3136	-89.5782	-94.8427	-100.107
R00822_R	-8.00203	-9.9164	-11.8308	-13.7451	-15.6595	-17.5739	-19.4882	-21.4026
R00823_F	-581.761	-591.811	-601.862	-611.912	-621.962	-632.013	-642.063	-652.114
R00823_R	415.493	408.793	402.092	395.392	388.692	381.991	375.291	368.591
R00825_F	-572.761	-582.811	-592.862	-602.912	-612.962	-623.013	-633.063	-643.114
R00825_R	406.493	399.793	393.092	386.392	379.692	372.991	366.291	359.591
R00829_F	4.99493	0.209004	-4.57692	-9.36284	-14.1488	-18.9347	-23.7206	-28.5065
R00829_R	-100.005	-104.791	-109.577	-114.363	-119.149	-123.935	-128.721	-133.507
R00830_F	-50.0081	-57.6656	-65.3231	-72.9805	-80.638	-88.2955	-95.953	-103.61
R00830_R	-68.7546	-73.0619	-77.3692	-81.6766	-85.9839	-90.2912	-94.5986	-98.9059
R00832_F	-46.5051	-51.291	-56.0769	-60.8628	-65.6488	-70.4347	-75.2206	-80.0065
R00832_R	-48.5051	-53.291	-58.0769	-62.8628	-67.6488	-72.4347	-77.2206	-82.0065
R00833_F	-32.9525	-35.3455	-37.7385	-40.1314	-42.5244	-44.9173	-47.3103	-49.7033
R00833_R	-14.5525	-16.9455	-19.3385	-21.7314	-24.1244	-26.5173	-28.9103	-31.3033
R00834_F	-42.9051	-47.691	-52.4769	-57.2628	-62.0488	-66.8347	-71.6206	-76.4065
R00834_R	-52.1051	-56.891	-61.6769	-66.4628	-71.2488	-76.0347	-80.8206	-85.6065
R00835_F	-47.9051	-52.691	-57.4769	-62.2628	-67.0488	-71.8347	-76.6206	-81.4065
R00835_R	-47.1051	-51.891	-56.6769	-61.4628	-66.2488	-71.0347	-75.8206	-80.6065
R00836_F	-72.9051	-77.691	-82.4769	-87.2628	-92.0488	-96.8347	-101.621	-106.407
R00836_R	-22.1051	-26.891	-31.6769	-36.4628	-41.2488	-46.0347	-50.8206	-55.6065
R00837_F	-67.6556	-72.9201	-78.1846	-83.4491	-88.7136	-93.9782	-99.2427	-104.507
R00837_R	-3.60203	-5.5164	-7.43077	-9.34514	-11.2595	-13.1739	-15.0882	-17.0026
R00838_F	-81.7556	-87.0201	-92.2846	-97.5491	-102.814	-108.078	-113.343	-118.607
R00838_R	10.498	8.5836	6.66923	4.75486	2.84049	0.926125	-0.988245	-2.90261
R00839_F	-81.7556	-87.0201	-92.2846	-97.5491	-102.814	-108.078	-113.343	-118.607
R00839_R	10.498	8.5836	6.66923	4.75486	2.84049	0.926125	-0.988245	-2.90261
R00841_F	-69.7556	-75.0201	-80.2846	-85.5491	-90.8136	-96.0782	-101.343	-106.607
R00841_R	-1.50203	-3.4164	-5.33077	-7.24514	-9.15951	-11.0739	-12.9882	-14.9026
R00842_F	-12.5051	-17.291	-22.0769	-26.8628	-31.6488	-36.4347	-41.2206	-46.0065
R00842_R	-82.5051	-87.291	-92.0769	-96.8628	-101.649	-106.435	-111.221	-116.007
R00844_F	-22.1051	-26.891	-31.6769	-36.4628	-41.2488	-46.0347	-50.8206	-55.6065
R00844_R	-72.9051	-77.691	-82.4769	-87.2628	-92.0488	-96.8347	-101.621	-106.407
R00845_F	-11.5051	-16.291	-21.0769	-25.8628	-30.6488	-35.4347	-40.2206	-45.0065
R00845_R	-83.5051	-88.291	-93.0769	-97.8628	-102.649	-107.435	-112.221	-117.007
R00846_F	-153.505	-158.291	-163.077	-167.863	-172.649	-177.435	-182.221	-187.007
R00846_R	58.4949	53.709	48.9231	44.1372	39.3512	34.5653	29.7794	24.9935
R00847_F	-65.7051	-70.491	-75.2769	-80.0628	-84.8488	-89.6347	-94.4206	-99.2065
R00847_R	-29.3051	-34.091	-38.8769	-43.6628	-48.4488	-53.2347	-58.0206	-62.8065
R00848_F	-45.0051	-49.791	-54.5769	-59.3628	-64.1488	-68.9347	-73.7206	-78.5065
R00848_R	-50.0051	-54.791	-59.5769	-64.3628	-69.1488	-73.9347	-78.7206	-83.5065
R00850_F	-50.8051	-55.591	-60.3769	-65.1628	-69.9488	-74.7347	-79.5206	-84.3065
R00850_R	-44.2051	-48.991	-53.7769	-58.5628	-63.3488	-68.1347	-72.9206	-77.7065
R00853_F	-63.7051	-68.491	-73.2769	-78.0628	-82.8488	-87.6347	-92.4206	-97.2065
R00853_R	-31.3051	-36.091	-40.8769	-45.6628	-50.4488	-55.2347	-60.0206	-64.8065
R00854_F	-70.6051	-75.391	-80.1769	-84.9628	-89.7488	-94.5347	-99.3206	-104.107
R00854_R	-24.4051	-29.191	-33.9769	-38.7628	-43.5488	-48.3347	-53.1206	-57.9065
R00855_F	-107.956	-113.22	-118.485	-123.749	-129.014	-134.278	-139.543	-144.807
R00855_R	36.698	34.7836	32.8692	30.9549	29.0405	27.1261	25.2118	23.2974
R00856_F	-42.3051	-47.091	-51.8769	-56.6628	-61.4488	-66.2347	-71.0206	-75.8065
R00856_R	-52.7051	-57.491	-62.2769	-67.0628	-71.8488	-76.6347	-81.4206	-86.2065
R00858_F	22.9899	13.418	3.84616	-5.72568	-15.2975	-24.8694	-34.4412	-44.0131
R00858_R	-213.01	-222.582	-232.154	-241.726	-251.298	-260.869	-270.441	-280.013
R00866_F	-62.5051	-67.291	-72.0769	-76.8628	-81.6488	-86.4347	-91.2206	-96.0065
R00866_R	-32.5051	-37.291	-42.0769	-46.8628	-51.6488	-56.4347	-61.2206	-66.0065
R00867_F	-52.7051	-57.491	-62.2769	-67.0628	-71.8488	-76.6347	-81.4206	-86.2065
R00867_R	-42.3051	-47.091	-51.8769	-56.6628	-61.4488	-66.2347	-71.0206	-75.8065
R00868_F	-29.0051	-33.791	-38.5769	-43.3628	-48.1488	-52.9347	-57.7206	-62.5065
R00868_R	-66.0051	-70.791	-75.5769	-80.3628	-85.1488	-89.9347	-94.7206	-99.5065
R00870_F	-38.6051	-43.391	-48.1769	-52.9628	-57.7488	-62.5347	-67.3206	-72.1065
R00870_R	-56.4051	-61.191	-65.9769	-70.7628	-75.5488	-80.3347	-85.1206	-89.9065
R00871_F	-28.8051	-33.591	-38.3769	-43.1628	-47.9488	-52.7347	-57.5206	-62.3065
R00871_R	-66.2051	-70.991	-75.7769	-80.5628	-85.3488	-90.1347	-94.9206	-99.7065
R00872_F	-105.056	-110.32	-115.585	-120.849	-126.114	-131.378	-136.643	-141.907
R00872_R	33.798	31.8836	29.9692	28.0549	26.1405	24.2261	22.3118	20.3974
R00874_F	-63.5051	-68.291	-73.0769	-77.8628	-82.6488	-87.4347	-92.2206	-97.0065
R00874_R	-31.5051	-36.291	-41.0769	-45.8628	-50.6488	-55.4347	-60.2206	-65.0065
R00875_F	-27.3051	-32.091	-36.8769	-41.6628	-46.4488	-51.2347	-56.0206	-60.8065
R00875_R	-67.7051	-72.491	-77.2769	-82.0628	-86.8488	-91.6347	-96.4206	-101.207
R00876_F	-74.4051	-79.191	-83.9769	-88.7628	-93.5488	-98.3347	-103.121	-107.907
R00876_R	-20.6051	-25.391	-30.1769	-34.9628	-39.7488	-44.5347	-49.3206	-54.1065
R00877_F	-26.5525	-28.9455	-31.3385	-33.7314	-36.1244	-38.5173	-40.9103	-43.3033
R00877_R	-20.9525	-23.3455	-25.7385	-28.1314	-30.5244	-32.9173	-35.3103	-37.7033
R00878_F	-25.5525	-27.9455	-30.3385	-32.7314	-35.1244	-37.5173	-39.9103	-42.3033
R00878_R	-21.9525	-24.3455	-26.7385	-29.1314	-31.5244	-33.9173	-36.3103	-38.7033
R00881_F	-89.3556	-94.6201	-99.8846	-105.149	-110.414	-115.678	-120.943	-126.207
R00881_R	18.098	16.1836	14.2692	12.3549	10.4405	8.52612	6.61176	4.69739
R00883_F	-43.8051	-48.591	-53.3769	-58.1628	-62.9488	-67.7347	-72.5206	-77.3065
R00883_R	-51.2051	-55.991	-60.7769	-65.5628	-70.3488	-75.1347	-79.9206	-84.7065
R00885_F	-67.2051	-71.991	-76.7769	-81.5628	-86.3488	-91.1347	-95.9206	-100.707
R00885_R	-27.8051	-32.591	-37.3769	-42.1628	-46.9488	-51.7347	-56.5206	-61.3065
R00889_F	-20.8525	-23.2455	-25.6385	-28.0314	-30.4244	-32.8173	-35.2103	-37.6033
R00889_R	-26.6525	-29.0455	-31.4385	-33.8314	-36.2244	-38.6173	-41.0103	-43.4033
R00891_F	-45.002	-46.9164	-48.8308	-50.7451	-52.6595	-54.5739	-56.4882	-58.4026
R00891_R	-26.2556	-31.5201	-36.7846	-42.0491	-47.3136	-52.5782	-57.8427	-63.1072
R00892_F	-40.7546	-45.0619	-49.3692	-53.6766	-57.9839	-62.2912	-66.5986	-70.9059
R00892_R	-78.0081	-85.6656	-93.3231	-100.981	-108.638	-116.296	-123.953	-131.61
R00894_F	-109.258	-116.436	-123.615	-130.794	-137.973	-145.152	-152.331	-159.51
R00894_R	-33.2576	-40.4365	-47.6154	-54.7943	-61.9731	-69.152	-76.3309	-83.5098
R00895_F	-59.5051	-64.291	-69.0769	-73.8628	-78.6488	-83.4347	-88.2206	-93.0065
R00895_R	-35.5051	-40.291	-45.0769	-49.8628	-54.6488	-59.4347	-64.2206	-69.0065
R00896_F	-59.5051	-64.291	-69.0769	-73.8628	-78.6488	-83.4347	-88.2206	-93.0065
R00896_R	-35.5051	-40.291	-45.0769	-49.8628	-54.6488	-59.4347	-64.2206	-69.0065
R00897_F	-102.505	-107.291	-112.077	-116.863	-121.649	-126.435	-131.221	-136.007
R00897_R	7.49493	2.709	-2.07692	-6.86284	-11.6488	-16.4347	-21.2206	-26.0065
R00899_F	-49.2556	-54.5201	-59.7846	-65.0491	-70.3136	-75.5782	-80.8427	-86.1072
R00899_R	-22.002	-23.9164	-25.8308	-27.7451	-29.6595	-31.5739	-33.4882	-35.4026
R00900_F	-33.7546	-38.0619	-42.3692	-46.6766	-50.9839	-55.2912	-59.5986	-63.9059
R00900_R	-85.0081	-92.6656	-100.323	-107.981	-115.638	-123.296	-130.953	-138.61
R00903_F	-32.7525	-35.1455	-37.5385	-39.9314	-42.3244	-44.7173	-47.1103	-49.5033
R00903_R	-14.7525	-17.1455	-19.5385	-21.9314	-24.3244	-26.7173	-29.1103	-31.5033
R00904_F	-79.5051	-84.291	-89.0769	-93.8628	-98.6488	-103.435	-108.221	-113.007
R00904_R	-15.5051	-20.291	-25.0769	-29.8628	-34.6488	-39.4347	-44.2206	-49.0065
R00905_F	-137.759	-145.895	-154.031	-162.167	-170.303	-178.439	-186.575	-194.711
R00905_R	42.7485	41.3127	39.8769	38.4411	37.0054	35.5696	34.1338	32.698
R00906_F	-45.0081	-52.6656	-60.3231	-67.9805	-75.638	-83.2955	-90.953	-98.6105
R00906_R	-73.7546	-78.0619	-82.3692	-86.6766	-90.9839	-95.2912	-99.5986	-103.906
R00907_F	-54.1051	-58.891	-63.6769	-68.4628	-73.2488	-78.0347	-82.8206	-87.6065
R00907_R	-40.9051	-45.691	-50.4769	-55.2628	-60.0488	-64.8347	-69.6206	-74.4065
R00908_F	-46.7051	-51.491	-56.2769	-61.0628	-65.8488	-70.6347	-75.4206	-80.2065
R00908_R	-48.3051	-53.091	-57.8769	-62.6628	-67.4488	-72.2347	-77.0206	-81.8065
R00909_F	-69.2556	-74.5201	-79.7846	-85.0491	-90.3136	-95.5782	-100.843	-106.107
R00909_R	-2.00203	-3.9164	-5.83077	-7.74514	-9.65951	-11.5739	-13.4882	-15.4026
R00910_F	-106.258	-113.436	-120.615	-127.794	-134.973	-142.152	-149.331	-156.51
R00910_R	-36.2576	-43.4365	-50.6154	-57.7943	-64.9731	-72.152	-79.3309	-86.5098
R00912_F	-86.2576	-93.4365	-100.615	-107.794	-114.973	-122.152	-129.331	-136.51
R00912_R	-56.2576	-63.4365	-70.6154	-77.7943	-84.9731	-92.152	-99.3309	-106.51
R00913_F	-116.256	-121.52	-126.785	-132.049	-137.314	-142.578	-147.843	-153.107
R00913_R	44.998	43.0836	41.1692	39.2549	37.3405	35.4261	33.5118	31.5974
R00918_F	-617.304	-668.514	-719.723	-770.932	-822.142	-873.351	-924.561	-975.77
R00918_R	-166.529	-194.288	-222.046	-249.804	-277.563	-305.321	-333.08	-360.838
R00919_F	23.7949	19.009	14.2231	9.43716	4.65123	-0.134688	-4.92061	-9.70653
R00919_R	-118.805	-123.591	-128.377	-133.163	-137.949	-142.735	-147.521	-152.307
R00920_F	-63.5576	-70.7365	-77.9154	-85.0943	-92.2731	-99.452	-106.631	-113.81
R00920_R	-78.9576	-86.1365	-93.3154	-100.494	-107.673	-114.852	-122.031	-129.21
R00921_F	-12.8051	-17.591	-22.3769	-27.1628	-31.9488	-36.7347	-41.5206	-46.3065
R00921_R	-82.2051	-86.991	-91.7769	-96.5628	-101.349	-106.135	-110.921	-115.707
R00922_F	-92.2576	-99.4365	-106.615	-113.794	-120.973	-128.152	-135.331	-142.51
R00922_R	-50.2576	-57.4365	-64.6154	-71.7943	-78.9731	-86.152	-93.3309	-100.51
R00923_F	-66.2556	-71.5201	-76.7846	-82.0491	-87.3136	-92.5782	-97.8427	-103.107
R00923_R	-5.00203	-6.9164	-8.83077	-10.7451	-12.6595	-14.5739	-16.4882	-18.4026
R00924_F	0.494927	-4.291	-9.07692	-13.8628	-18.6488	-23.4347	-28.2206	-33.0065
R00924_R	-95.5051	-100.291	-105.077	-109.863	-114.649	-119.435	-124.221	-129.007
R00925_F	-76.9576	-84.1365	-91.3154	-98.4943	-105.673	-112.852	-120.031	-127.21
R00925_R	-65.5576	-72.7365	-79.9154	-87.0943	-94.2731	-101.452	-108.631	-115.81
R00927_F	-0.105073	-4.891	-9.67692	-14.4628	-19.2488	-24.0347	-28.8206	-33.6065
R00927_R	-94.9051	-99.691	-104.477	-109.263	-114.049	-118.835	-123.621	-128.407
R00928_F	-35.5051	-40.291	-45.0769	-49.8628	-54.6488	-59.4347	-64.2206	-69.0065
R00928_R	-59.5051	-64.291	-69.0769	-73.8628	-78.6488	-83.4347	-88.2206	-93.0065
R00930_F	-42.5051	-47.291	-52.0769	-56.8628	-61.6488	-66.4347	-71.2206	-76.0065
R00930_R	-52.5051	-57.291	-62.0769	-66.8628	-71.6488	-76.4347	-81.2206	-86.0065
R00931_F	-20.8051	-25.591	-30.3769	-35.1628	-39.9488	-44.7347	-49.5206	-54.3065
R00931_R	-74.2051	-78.991	-83.7769	-88.5628	-93.3488	-98.1347	-102.921	-107.707
R00932_F	-10.3051	-15.091	-19.8769	-24.6628	-29.4488	-34.2347	-39.0206	-43.8065
R00932_R	-84.7051	-89.491	-94.2769	-99.0628	-103.849	-108.635	-113.421	-118.207
R00934_F	-19.102	-21.0164	-22.9308	-24.8451	-26.7595	-28.6739	-30.5882	-32.5026
R00934_R	-52.1556	-57.4201	-62.6846	-67.9491	-73.2136	-78.4782	-83.7427	-89.0072
R00935_F	-92.2576	-99.4365	-106.615	-113.794	-120.973	-128.152	-135.331	-142.51
R00935_R	-50.2576	-57.4365	-64.6154	-71.7943	-78.9731	-86.152	-93.3309	-100.51
R00936_F	-23.7051	-28.491	-33.2769	-38.0628	-42.8488	-47.6347	-52.4206	-57.2065
R00936_R	-71.3051	-76.091	-80.8769	-85.6628	-90.4488	-95.2347	-100.021	-104.807
R00937_F	-30.2576	-37.4365	-44.6154	-51.7943	-58.9731	-66.152	-73.3309	-80.5098
R00937_R	-112.258	-119.436	-126.615	-133.794	-140.973	-148.152	-155.331	-162.51
R00939_F	-33.3051	-38.091	-42.8769	-47.6628	-52.4488	-57.2347	-62.0206	-66.8065
R00939_R	-61.7051	-66.491	-71.2769	-76.0628	-80.8488	-85.6347	-90.4206	-95.2065
R00940_F	-49.2576	-56.4365	-63.6154	-70.7943	-77.9731	-85.152	-92.3309	-99.5098
R00940_R	-93.2576	-100.436	-107.615	-114.794	-121.973	-129.152	-136.331	-143.51
R00941_F	-106.008	-113.666	-121.323	-128.981	-136.638	-144.296	-151.953	-159.61
R00941_R	-12.7546	-17.0619	-21.3692	-25.6766	-29.9839	-34.2912	-38.5986	-42.9059
R00943_F	-88.6576	-95.8365	-103.015	-110.194	-117.373	-124.552	-131.731	-138.91
R00943_R	-53.8576	-61.0365	-68.2154	-75.3943	-82.5731	-89.752	-96.9309	-104.11
R00944_F	-70.5556	-75.8201	-81.0846	-86.3491	-91.6136	-96.8782	-102.143	-107.407
R00944_R	-0.702029	-2.6164	-4.53077	-6.44514	-8.35951	-10.2739	-12.1882	-14.1026
R00945_F	-24.0051	-28.791	-33.5769	-38.3628	-43.1488	-47.9347	-52.7206	-57.5065
R00945_R	-71.0051	-75.791	-80.5769	-85.3628	-90.1488	-94.9347	-99.7206	-104.507
R00946_F	-39.5051	-44.291	-49.0769	-53.8628	-58.6488	-63.4347	-68.2206	-73.0065
R00946_R	-55.5051	-60.291	-65.0769	-69.8628	-74.6488	-79.4347	-84.2206	-89.0065
R00947_F	-73.0556	-78.3201	-83.5846	-88.8491	-94.1136	-99.3782	-104.643	-109.907
R00947_R	1.79797	-0.116398	-2.03077	-3.94514	-5.85951	-7.77388	-9.68824	-11.6026
R00948_F	-51.9051	-56.691	-61.4769	-66.2628	-71.0488	-75.8347	-80.6206	-85.4065
R00948_R	-43.1051	-47.891	-52.6769	-57.4628	-62.2488	-67.0347	-71.8206	-76.6065
R00949_F	-66.9051	-71.691	-76.4769	-81.2628	-86.0488	-90.8347	-95.6206	-100.407
R00949_R	-28.1051	-32.891	-37.6769	-42.4628	-47.2488	-52.0347	-56.8206	-61.6065
R00951_F	-96.9556	-102.22	-107.485	-112.749	-118.014	-123.278	-128.543	-133.807
R00951_R	25.698	23.7836	21.8692	19.9549	18.0405	16.1261	14.2118	12.2974
R00952_F	-37.8051	-42.591	-47.3769	-52.1628	-56.9488	-61.7347	-66.5206	-71.3065
R00952_R	-57.2051	-61.991	-66.7769	-71.5628	-76.3488	-81.1347	-85.9206	-90.7065
R00953_F	-38.6051	-43.391	-48.1769	-52.9628	-57.7488	-62.5347	-67.3206	-72.1065
R00953_R	-56.4051	-61.191	-65.9769	-70.7628	-75.5488	-80.3347	-85.1206	-89.9065
R00954_F	-56.5051	-61.291	-66.0769	-70.8628	-75.6488	-80.4347	-85.2206	-90.0065
R00954_R	-38.5051	-43.291	-48.0769	-52.8628	-57.6488	-62.4347	-67.2206	-72.0065
R00955_F	-56.6051	-61.391	-66.1769	-70.9628	-75.7488	-80.5347	-85.3206	-90.1065
R00955_R	-38.4051	-43.191	-47.9769	-52.7628	-57.5488	-62.3347	-67.1206	-71.9065
R00956_F	-47.4051	-52.191	-56.9769	-61.7628	-66.5488	-71.3347	-76.1206	-80.9065
R00956_R	-47.6051	-52.391	-57.1769	-61.9628	-66.7488	-71.5347	-76.3206	-81.1065
R00957_F	-106.708	-114.366	-122.023	-129.681	-137.338	-144.996	-152.653	-160.31
R00957_R	-12.0546	-16.3619	-20.6692	-24.9766	-29.2839	-33.5912	-37.8986	-42.2059
R00959_F	-19.2525	-21.6455	-24.0385	-26.4314	-28.8244	-31.2173	-33.6103	-36.0033
R00959_R	-28.2525	-30.6455	-33.0385	-35.4314	-37.8244	-40.2173	-42.6103	-45.0033
R00960_F	-53.6051	-58.391	-63.1769	-67.9628	-72.7488	-77.5347	-82.3206	-87.1065
R00960_R	-41.4051	-46.191	-50.9769	-55.7628	-60.5488	-65.3347	-70.1206	-74.9065
R00961_F	-61.4556	-66.7201	-71.9846	-77.2491	-82.5136	-87.7782	-93.0427	-98.3072
R00961_R	-9.80203	-11.7164	-13.6308	-15.5451	-17.4595	-19.3739	-21.2882	-23.2026
R00962_F	-55.5051	-60.291	-65.0769	-69.8628	-74.6488	-79.4347	-84.2206	-89.0065
R00962_R	-39.5051	-44.291	-49.0769	-53.8628	-58.6488	-63.4347	-68.2206	-73.0065
R00963_F	-74.2556	-79.5201	-84.7846	-90.0491	-95.3136	-100.578	-105.843	-111.107
R00963_R	2.99797	1.0836	-0.830768	-2.74514	-4.65951	-6.57388	-8.48824	-10.4026
R00964_F	-61.5051	-66.291	-71.0769	-75.8628	-80.6488	-85.4347	-90.2206	-95.0065
R00964_R	-33.5051	-38.291	-43.0769	-47.8628	-52.6488	-57.4347	-62.2206	-67.0065
R00965_F	-78.2556	-83.5201	-88.7846	-94.0491	-99.3136	-104.578	-109.843	-115.107
R00965_R	6.99797	5.0836	3.16923	1.25486	-0.659506	-2.57388	-4.48824	-6.40261
R00966_F	-18.5051	-23.291	-28.0769	-32.8628	-37.6488	-42.4347	-47.2206	-52.0065
R00966_R	-76.5051	-81.291	-86.0769	-90.8628	-95.6488	-100.435	-105.221	-110.007
R00967_F	-71.5051	-76.291	-81.0769	-85.8628	-90.6488	-95.4347	-100.221	-105.007
R00967_R	-23.5051	-28.291	-33.0769	-37.8628	-42.6488	-47.4347	-52.2206	-57.0065
R00968_F	-62.5051	-67.291	-72.0769	-76.8628	-81.6488	-86.4347	-91.2206	-96.0065
R00968_R	-32.5051	-37.291	-42.0769	-46.8628	-51.6488	-56.4347	-61.2206	-66.0065
R00969_F	-111.256	-116.52	-121.785	-127.049	-132.314	-137.578	-142.843	-148.107
R00969_R	39.998	38.0836	36.1692	34.2549	32.3405	30.4261	28.5118	26.5974
R00970_F	-64.5051	-69.291	-74.0769	-78.8628	-83.6488	-88.4347	-93.2206	-98.0065
R00970_R	-30.5051	-35.291	-40.0769	-44.8628	-49.6488	-54.4347	-59.2206	-64.0065
R00973_F	-74.2556	-79.5201	-84.7846	-90.0491	-95.3136	-100.578	-105.843	-111.107
R00973_R	2.99797	1.0836	-0.830768	-2.74514	-4.65951	-6.57388	-8.48824	-10.4026
R00974_F	-72.5556	-77.8201	-83.0846	-88.3491	-93.6136	-98.8782	-104.143	-109.407
R00974_R	1.29797	-0.616398	-2.53077	-4.44514	-6.35951	-8.27388	-10.1882	-12.1026
R00975_F	-178.505	-183.291	-188.077	-192.863	-197.649	-202.435	-207.221	-212.007
R00975_R	83.4949	78.709	73.9231	69.1372	64.3512	59.5653	54.7794	49.9935
R00977_F	-37.5051	-42.291	-47.0769	-51.8628	-56.6488	-61.4347	-66.2206	-71.0065
R00977_R	-57.5051	-62.291	-67.0769	-71.8628	-76.6488	-81.4347	-86.2206	-91.0065
R00980_F	-534.258	-541.436	-548.615	-555.794	-562.973	-570.152	-577.331	-584.51
R00980_R	391.742	384.564	377.385	370.206	363.027	355.848	348.669	341.49
R00982_F	-80.7576	-87.9365	-95.1154	-102.294	-109.473	-116.652	-123.831	-131.01
R00982_R	-61.7576	-68.9365	-76.1154	-83.2943	-90.4731	-97.652	-104.831	-112.01
R00983_F	-497.505	-502.291	-507.077	-511.863	-516.649	-521.435	-526.221	-531.007
R00983_R	402.495	397.709	392.923	388.137	383.351	378.565	373.779	368.993
R00985_F	-144.505	-149.291	-154.077	-158.863	-163.649	-168.435	-173.221	-178.007
R00985_R	49.4949	44.709	39.9231	35.1372	30.3512	25.5653	20.7794	15.9935
R00986_F	-189.008	-196.666	-204.323	-211.981	-219.638	-227.296	-234.953	-242.61
R00986_R	70.2454	65.9381	61.6308	57.3234	53.0161	48.7088	44.4014	40.0941
R00987_F	-106.756	-112.02	-117.285	-122.549	-127.814	-133.078	-138.343	-143.607
R00987_R	35.498	33.5836	31.6692	29.7549	27.8405	25.9261	24.0118	22.0974
R00988_F	-90.2556	-95.5201	-100.785	-106.049	-111.314	-116.578	-121.843	-127.107
R00988_R	18.998	17.0836	15.1692	13.2549	11.3405	9.42612	7.51176	5.59739
R00989_F	-57.8051	-62.591	-67.3769	-72.1628	-76.9488	-81.7347	-86.5206	-91.3065
R00989_R	-37.2051	-41.991	-46.7769	-51.5628	-56.3488	-61.1347	-65.9206	-70.7065
R00990_F	-62.0556	-67.3201	-72.5846	-77.8491	-83.1136	-88.3782	-93.6427	-98.9072
R00990_R	-9.20203	-11.1164	-13.0308	-14.9451	-16.8595	-18.7739	-20.6882	-22.6026
R00993_F	-185.258	-192.436	-199.615	-206.794	-213.973	-221.152	-228.331	-235.51
R00993_R	42.7424	35.5635	28.3846	21.2057	14.0269	6.84797	-0.330917	-7.5098
R00994_F	-45.7546	-50.0619	-54.3692	-58.6766	-62.9839	-67.2912	-71.5986	-75.9059
R00994_R	-73.0081	-80.6656	-88.3231	-95.9805	-103.638	-111.296	-118.953	-126.61
R00995_F	4.99797	3.0836	1.16923	-0.745137	-2.65951	-4.57388	-6.48824	-8.40261
R00995_R	-76.2556	-81.5201	-86.7846	-92.0491	-97.3136	-102.578	-107.843	-113.107
R00996_F	-77.2556	-82.5201	-87.7846	-93.0491	-98.3136	-103.578	-108.843	-114.107
R00996_R	5.99797	4.0836	2.16923	0.254863	-1.65951	-3.57388	-5.48824	-7.40261
R00997_F	-11.2556	-16.5201	-21.7846	-27.0491	-32.3136	-37.5782	-42.8427	-48.1072
R00997_R	-60.002	-61.9164	-63.8308	-65.7451	-67.6595	-69.5739	-71.4882	-73.4026
R00998_F	-34.5051	-39.291	-44.0769	-48.8628	-53.6488	-58.4347	-63.2206	-68.0065
R00998_R	-60.5051	-65.291	-70.0769	-74.8628	-79.6488	-84.4347	-89.2206	-94.0065
R00999_F	-148.759	-156.895	-165.031	-173.167	-181.303	-189.439	-197.575	-205.711
R00999_R	53.7485	52.3127	50.8769	49.4411	48.0054	46.5696	45.1338	43.698
R01000_F	-22.4051	-27.191	-31.9769	-36.7628	-41.5488	-46.3347	-51.1206	-55.9065
R01000_R	-72.6051	-77.391	-82.1769	-86.9628	-91.7488	-96.5347	-101.321	-106.107
R01001_F	-79.7586	-87.8947	-96.0308	-104.167	-112.303	-120.439	-128.575	-136.711
R01001_R	-15.2515	-16.6873	-18.1231	-19.5589	-20.9946	-22.4304	-23.8662	-25.302
R01010_F	-72.2556	-77.5201	-82.7846	-88.0491	-93.3136	-98.5782	-103.843	-109.107
R01010_R	0.997971	-0.916398	-2.83077	-4.74514	-6.65951	-8.57388	-10.4882	-12.4026
R01011_F	-63.2051	-67.991	-72.7769	-77.5628	-82.3488	-87.1347	-91.9206	-96.7065
R01011_R	-31.8051	-36.591	-41.3769	-46.1628	-50.9488	-55.7347	-60.5206	-65.3065
R01012_F	-93.3051	-98.091	-102.877	-107.663	-112.449	-117.235	-122.021	-126.807
R01012_R	-1.70507	-6.491	-11.2769	-16.0628	-20.8488	-25.6347	-30.4206	-35.2065
R01014_F	-41.7556	-47.0201	-52.2846	-57.5491	-62.8136	-68.0782	-73.3427	-78.6072
R01014_R	-29.502	-31.4164	-33.3308	-35.2451	-37.1595	-39.0739	-40.9882	-42.9026
R01015_F	-34.3525	-36.7455	-39.1385	-41.5314	-43.9244	-46.3173	-48.7103	-51.1033
R01015_R	-13.1525	-15.5455	-17.9385	-20.3314	-22.7244	-25.1173	-27.5103	-29.9033
R01016_F	-117.156	-122.42	-127.685	-132.949	-138.214	-143.478	-148.743	-154.007
R01016_R	45.898	43.9836	42.0692	40.1549	38.2405	36.3261	34.4118	32.4974
R01019_F	-165.505	-170.291	-175.077	-179.863	-184.649	-189.435	-194.221	-199.007
R01019_R	70.4949	65.709	60.9231	56.1372	51.3512	46.5653	41.7794	36.9935
R01021_F	-63.4051	-68.191	-72.9769	-77.7628	-82.5488	-87.3347	-92.1206	-96.9065
R01021_R	-31.6051	-36.391	-41.1769	-45.9628	-50.7488	-55.5347	-60.3206	-65.1065
R01023_F	-53.2051	-57.991	-62.7769	-67.5628	-72.3488	-77.1347	-81.9206	-86.7065
R01023_R	-41.8051	-46.591	-51.3769	-56.1628	-60.9488	-65.7347	-70.5206	-75.3065
R01026_F	-78.0556	-83.3201	-88.5846	-93.8491	-99.1136	-104.378	-109.643	-114.907
R01026_R	6.79797	4.8836	2.96923	1.05486	-0.859506	-2.77388	-4.68824	-6.60261
R01034_F	-15.0051	-19.791	-24.5769	-29.3628	-34.1488	-38.9347	-43.7206	-48.5065
R01034_R	-80.0051	-84.791	-89.5769	-94.3628	-99.1488	-103.935	-108.721	-113.507
R01036_F	0.194927	-4.591	-9.37692	-14.1628	-18.9488	-23.7347	-28.5206	-33.3065
R01036_R	-95.2051	-99.991	-104.777	-109.563	-114.349	-119.135	-123.921	-128.707
R01039_F	-24.6051	-29.391	-34.1769	-38.9628	-43.7488	-48.5347	-53.3206	-58.1065
R01039_R	-70.4051	-75.191	-79.9769	-84.7628	-89.5488	-94.3347	-99.1206	-103.907
R01041_F	-9.40507	-14.191	-18.9769	-23.7628	-28.5488	-33.3347	-38.1206	-42.9065
R01041_R	-85.6051	-90.391	-95.1769	-99.9628	-104.749	-109.535	-114.321	-119.107
R01043_F	-93.6556	-98.9201	-104.185	-109.449	-114.714	-119.978	-125.243	-130.507
R01043_R	22.398	20.4836	18.5692	16.6549	14.7405	12.8261	10.9118	8.99739
R01044_F	-26.8051	-31.591	-36.3769	-41.1628	-45.9488	-50.7347	-55.5206	-60.3065
R01044_R	-68.2051	-72.991	-77.7769	-82.5628	-87.3488	-92.1347	-96.9206	-101.707
R01047_F	-57.3525	-59.7455	-62.1385	-64.5314	-66.9244	-69.3173	-71.7103	-74.1033
R01047_R	9.84746	7.4545	5.06154	2.66858	0.275617	-2.11734	-4.51031	-6.90327
R01049_F	-46.0051	-50.791	-55.5769	-60.3628	-65.1488	-69.9347	-74.7206	-79.5065
R01049_R	-49.0051	-53.791	-58.5769	-63.3628	-68.1488	-72.9347	-77.7206	-82.5065
R01050_F	-42.6051	-47.391	-52.1769	-56.9628	-61.7488	-66.5347	-71.3206	-76.1065
R01050_R	-52.4051	-57.191	-61.9769	-66.7628	-71.5488	-76.3347	-81.1206	-85.9065
R01051_F	-75.6051	-80.391	-85.1769	-89.9628	-94.7488	-99.5347	-104.321	-109.107
R01051_R	-19.4051	-24.191	-28.9769	-33.7628	-38.5488	-43.3347	-48.1206	-52.9065
R01052_F	-37.5051	-42.291	-47.0769	-51.8628	-56.6488	-61.4347	-66.2206	-71.0065
R01052_R	-57.5051	-62.291	-67.0769	-71.8628	-76.6488	-81.4347	-86.2206	-91.0065
R01053_F	-107.258	-114.436	-121.615	-128.794	-135.973	-143.152	-150.331	-157.51
R01053_R	-35.2576	-42.4365	-49.6154	-56.7943	-63.9731	-71.152	-78.3309	-85.5098
R01054_F	-90.2556	-95.5201	-100.785	-106.049	-111.314	-116.578	-121.843	-127.107
R01054_R	18.998	17.0836	15.1692	13.2549	11.3405	9.42612	7.51176	5.59739
R01055_F	-43.402	-45.3164	-47.2308	-49.1451	-51.0595	-52.9739	-54.8882	-56.8026
R01055_R	-27.8556	-33.1201	-38.3846	-43.6491	-48.9136	-54.1782	-59.4427	-64.7072
R01056_F	-16.8525	-19.2455	-21.6385	-24.0314	-26.4244	-28.8173	-31.2103	-33.6033
R01056_R	-30.6525	-33.0455	-35.4385	-37.8314	-40.2244	-42.6173	-45.0103	-47.4033
R01057_F	-44.4525	-46.8455	-49.2385	-51.6314	-54.0244	-56.4173	-58.8103	-61.2033
R01057_R	-3.05254	-5.4455	-7.83846	-10.2314	-12.6244	-15.0173	-17.4103	-19.8033
R01058_F	-98.2051	-102.991	-107.777	-112.563	-117.349	-122.135	-126.921	-131.707
R01058_R	3.19493	-1.591	-6.37692	-11.1628	-15.9488	-20.7347	-25.5206	-30.3065
R01059_F	-67.8051	-72.591	-77.3769	-82.1628	-86.9488	-91.7347	-96.5206	-101.307
R01059_R	-27.2051	-31.991	-36.7769	-41.5628	-46.3488	-51.1347	-55.9206	-60.7065
R01061_F	-28.7546	-33.0619	-37.3692	-41.6766	-45.9839	-50.2912	-54.5986	-58.9059
R01061_R	-90.0081	-97.6656	-105.323	-112.981	-120.638	-128.296	-135.953	-143.61
R01063_F	-38.3546	-42.6619	-46.9692	-51.2766	-55.5839	-59.8912	-64.1986	-68.5059
R01063_R	-80.4081	-88.0656	-95.7231	-103.381	-111.038	-118.696	-126.353	-134.01
R01064_F	-42.3556	-47.6201	-52.8846	-58.1491	-63.4136	-68.6782	-73.9427	-79.2072
R01064_R	-28.902	-30.8164	-32.7308	-34.6451	-36.5595	-38.4739	-40.3882	-42.3026
R01066_F	-35.7556	-41.0201	-46.2846	-51.5491	-56.8136	-62.0782	-67.3427	-72.6072
R01066_R	-35.502	-37.4164	-39.3308	-41.2451	-43.1595	-45.0739	-46.9882	-48.9026
R01067_F	-28.6051	-33.391	-38.1769	-42.9628	-47.7488	-52.5347	-57.3206	-62.1065
R01067_R	-66.4051	-71.191	-75.9769	-80.7628	-85.5488	-90.3347	-95.1206	-99.9065
R01068_F	-26.7556	-32.0201	-37.2846	-42.5491	-47.8136	-53.0782	-58.3427	-63.6072
R01068_R	-44.502	-46.4164	-48.3308	-50.2451	-52.1595	-54.0739	-55.9882	-57.9026
R01069_F	-44.7556	-50.0201	-55.2846	-60.5491	-65.8136	-71.0782	-76.3427	-81.6072
R01069_R	-26.502	-28.4164	-30.3308	-32.2451	-34.1595	-36.0739	-37.9882	-39.9026
R01070_F	-44.7556	-50.0201	-55.2846	-60.5491	-65.8136	-71.0782	-76.3427	-81.6072
R01070_R	-26.502	-28.4164	-30.3308	-32.2451	-34.1595	-36.0739	-37.9882	-39.9026
R01072_F	24.5454	20.2381	15.9308	11.6234	7.31611	3.00878	-1.29855	-5.60588
R01072_R	-143.308	-150.966	-158.623	-166.281	-173.938	-181.596	-189.253	-196.91
R01073_F	14.4949	9.709	4.92308	0.137158	-4.64877	-9.43469	-14.2206	-19.0065
R01073_R	-109.505	-114.291	-119.077	-123.863	-128.649	-133.435	-138.221	-143.007
R01075_F	-81.9576	-89.1365	-96.3154	-103.494	-110.673	-117.852	-125.031	-132.21
R01075_R	-60.5576	-67.7365	-74.9154	-82.0943	-89.2731	-96.452	-103.631	-110.81
R01076_F	-65.5556	-70.8201	-76.0846	-81.3491	-86.6136	-91.8782	-97.1427	-102.407
R01076_R	-5.70203	-7.6164	-9.53077	-11.4451	-13.3595	-15.2739	-17.1882	-19.1026
R01077_F	-47.6556	-52.9201	-58.1846	-63.4491	-68.7136	-73.9782	-79.2427	-84.5072
R01077_R	-23.602	-25.5164	-27.4308	-29.3451	-31.2595	-33.1739	-35.0882	-37.0026
R01079_F	-99.6051	-104.391	-109.177	-113.963	-118.749	-123.535	-128.321	-133.107
R01079_R	4.59493	-0.190996	-4.97692	-9.76284	-14.5488	-19.3347	-24.1206	-28.9065
R01080_F	-59.6556	-64.9201	-70.1846	-75.4491	-80.7136	-85.9782	-91.2427	-96.5072
R01080_R	-11.602	-13.5164	-15.4308	-17.3451	-19.2595	-21.1739	-23.0882	-25.0026
R01081_F	-21.0525	-23.4455	-25.8385	-28.2314	-30.6244	-33.0173	-35.4103	-37.8033
R01081_R	-26.4525	-28.8455	-31.2385	-33.6314	-36.0244	-38.4173	-40.8103	-43.2033
R01082_F	-20.0425	-22.4355	-24.8285	-27.2214	-29.6144	-32.0073	-34.4003	-36.7933
R01082_R	-27.4625	-29.8555	-32.2485	-34.6414	-37.0344	-39.4273	-41.8203	-44.2133
R01083_F	-34.2556	-39.5201	-44.7846	-50.0491	-55.3136	-60.5782	-65.8427	-71.1072
R01083_R	-37.002	-38.9164	-40.8308	-42.7451	-44.6595	-46.5739	-48.4882	-50.4026
R01085_F	-113.956	-119.22	-124.485	-129.749	-135.014	-140.278	-145.543	-150.807
R01085_R	42.698	40.7836	38.8692	36.9549	35.0405	33.1261	31.2118	29.2974
R01086_F	-46.0556	-51.3201	-56.5846	-61.8491	-67.1136	-72.3782	-77.6427	-82.9072
R01086_R	-25.202	-27.1164	-29.0308	-30.9451	-32.8595	-34.7739	-36.6882	-38.6026
R01087_F	-28.5525	-30.9455	-33.3385	-35.7314	-38.1244	-40.5173	-42.9103	-45.3033
R01087_R	-18.9525	-21.3455	-23.7385	-26.1314	-28.5244	-30.9173	-33.3103	-35.7033
R01088_F	-31.6081	-39.2656	-46.9231	-54.5805	-62.238	-69.8955	-77.553	-85.2105
R01088_R	-87.1546	-91.4619	-95.7692	-100.077	-104.384	-108.691	-112.999	-117.306
R01089_F	-59.7051	-64.491	-69.2769	-74.0628	-78.8488	-83.6347	-88.4206	-93.2065
R01089_R	-35.3051	-40.091	-44.8769	-49.6628	-54.4488	-59.2347	-64.0206	-68.8065
R01090_F	-43.4051	-48.191	-52.9769	-57.7628	-62.5488	-67.3347	-72.1206	-76.9065
R01090_R	-51.6051	-56.391	-61.1769	-65.9628	-70.7488	-75.5347	-80.3206	-85.1065
R01091_F	-16.2525	-18.6455	-21.0385	-23.4314	-25.8244	-28.2173	-30.6103	-33.0033
R01091_R	-31.2525	-33.6455	-36.0385	-38.4314	-40.8244	-43.2173	-45.6103	-48.0033
R01092_F	-55.7051	-60.491	-65.2769	-70.0628	-74.8488	-79.6347	-84.4206	-89.2065
R01092_R	-39.3051	-44.091	-48.8769	-53.6628	-58.4488	-63.2347	-68.0206	-72.8065
R01093_F	-74.1051	-78.891	-83.6769	-88.4628	-93.2488	-98.0347	-102.821	-107.607
R01093_R	-20.9051	-25.691	-30.4769	-35.2628	-40.0488	-44.8347	-49.6206	-54.4065
R01094_F	-54.7051	-59.491	-64.2769	-69.0628	-73.8488	-78.6347	-83.4206	-88.2065
R01094_R	-40.3051	-45.091	-49.8769	-54.6628	-59.4488	-64.2347	-69.0206	-73.8065
R01095_F	-64.5051	-69.291	-74.0769	-78.8628	-83.6488	-88.4347	-93.2206	-98.0065
R01095_R	-30.5051	-35.291	-40.0769	-44.8628	-49.6488	-54.4347	-59.2206	-64.0065
R01096_F	-69.2051	-73.991	-78.7769	-83.5628	-88.3488	-93.1347	-97.9206	-102.707
R01096_R	-25.8051	-30.591	-35.3769	-40.1628	-44.9488	-49.7347	-54.5206	-59.3065
R01097_F	-64.2051	-68.991	-73.7769	-78.5628	-83.3488	-88.1347	-92.9206	-97.7065
R01097_R	-30.8051	-35.591	-40.3769	-45.1628	-49.9488	-54.7347	-59.5206	-64.3065
R01098_F	-218.505	-223.291	-228.077	-232.863	-237.649	-242.435	-247.221	-252.007
R01098_R	123.495	118.709	113.923	109.137	104.351	99.5653	94.7794	89.9935
R01099_F	-160.505	-165.291	-170.077	-174.863	-179.649	-184.435	-189.221	-194.007
R01099_R	65.4949	60.709	55.9231	51.1372	46.3512	41.5653	36.7794	31.9935
R01100_F	-62.9556	-68.2201	-73.4846	-78.7491	-84.0136	-89.2782	-94.5427	-99.8072
R01100_R	-8.30203	-10.2164	-12.1308	-14.0451	-15.9595	-17.8739	-19.7882	-21.7026
R01101_F	-62.9556	-68.2201	-73.4846	-78.7491	-84.0136	-89.2782	-94.5427	-99.8072
R01101_R	-8.30203	-10.2164	-12.1308	-14.0451	-15.9595	-17.8739	-19.7882	-21.7026
R01103_F	-50.2556	-55.5201	-60.7846	-66.0491	-71.3136	-76.5782	-81.8427	-87.1072
R01103_R	-21.002	-22.9164	-24.8308	-26.7451	-28.6595	-30.5739	-32.4882	-34.4026
R01104_F	-54.3556	-59.6201	-64.8846	-70.1491	-75.4136	-80.6782	-85.9427	-91.2072
R01104_R	-16.902	-18.8164	-20.7308	-22.6451	-24.5595	-26.4739	-28.3882	-30.3026
R01109_F	-59.2576	-66.4365	-73.6154	-80.7943	-87.9731	-95.152	-102.331	-109.51
R01109_R	-83.2576	-90.4365	-97.6154	-104.794	-111.973	-119.152	-126.331	-133.51
R01110_F	-77.5576	-84.7365	-91.9154	-99.0943	-106.273	-113.452	-120.631	-127.81
R01110_R	-64.9576	-72.1365	-79.3154	-86.4943	-93.6731	-100.852	-108.031	-115.21
R01111_F	-49.2051	-53.991	-58.7769	-63.5628	-68.3488	-73.1347	-77.9206	-82.7065
R01111_R	-45.8051	-50.591	-55.3769	-60.1628	-64.9488	-69.7347	-74.5206	-79.3065
R01113_F	-54.2576	-61.4365	-68.6154	-75.7943	-82.9731	-90.152	-97.3309	-104.51
R01113_R	-88.2576	-95.4365	-102.615	-109.794	-116.973	-124.152	-131.331	-138.51
R01121_F	-143.511	-154.04	-164.569	-175.098	-185.627	-196.156	-206.685	-217.214
R01121_R	0.995942	-2.8328	-6.66154	-10.4903	-14.319	-18.1478	-21.9765	-25.8052
R01123_F	-28.0525	-30.4455	-32.8385	-35.2314	-37.6244	-40.0173	-42.4103	-44.8033
R01123_R	-19.4525	-21.8455	-24.2385	-26.6314	-29.0244	-31.4173	-33.8103	-36.2033
R01126_F	-62.8556	-68.1201	-73.3846	-78.6491	-83.9136	-89.1782	-94.4427	-99.7072
R01126_R	-8.40203	-10.3164	-12.2308	-14.1451	-16.0595	-17.9739	-19.8882	-21.8026
R01127_F	-3.75254	-6.1455	-8.53846	-10.9314	-13.3244	-15.7173	-18.1103	-20.5033
R01127_R	-43.7525	-46.1455	-48.5385	-50.9314	-53.3244	-55.7173	-58.1103	-60.5033
R01128_F	-75.2556	-80.5201	-85.7846	-91.0491	-96.3136	-101.578	-106.843	-112.107
R01128_R	3.99797	2.0836	0.169232	-1.74514	-3.65951	-5.57388	-7.48824	-9.40261
R01130_F	-10.5051	-15.291	-20.0769	-24.8628	-29.6488	-34.4347	-39.2206	-44.0065
R01130_R	-84.5051	-89.291	-94.0769	-98.8628	-103.649	-108.435	-113.221	-118.007
R01131_F	-72.7051	-77.491	-82.2769	-87.0628	-91.8488	-96.6347	-101.421	-106.207
R01131_R	-22.3051	-27.091	-31.8769	-36.6628	-41.4488	-46.2347	-51.0206	-55.8065
R01132_F	-19.8051	-24.591	-29.3769	-34.1628	-38.9488	-43.7347	-48.5206	-53.3065
R01132_R	-75.2051	-79.991	-84.7769	-89.5628	-94.3488	-99.1347	-103.921	-108.707
R01135_F	-81.4576	-88.6365	-95.8154	-102.994	-110.173	-117.352	-124.531	-131.71
R01135_R	-61.0576	-68.2365	-75.4154	-82.5943	-89.7731	-96.952	-104.131	-111.31
R01137_F	-41.9051	-46.691	-51.4769	-56.2628	-61.0488	-65.8347	-70.6206	-75.4065
R01137_R	-53.1051	-57.891	-62.6769	-67.4628	-72.2488	-77.0347	-81.8206	-86.6065
R01138_F	-22.9051	-27.691	-32.4769	-37.2628	-42.0488	-46.8347	-51.6206	-56.4065
R01138_R	-72.1051	-76.891	-81.6769	-86.4628	-91.2488	-96.0347	-100.821	-105.607
R01139_F	-74.5051	-79.291	-84.0769	-88.8628	-93.6488	-98.4347	-103.221	-108.007
R01139_R	-20.5051	-25.291	-30.0769	-34.8628	-39.6488	-44.4347	-49.2206	-54.0065
R01140_F	-76.2051	-80.991	-85.7769	-90.5628	-95.3488	-100.135	-104.921	-109.707
R01140_R	-18.8051	-23.591	-28.3769	-33.1628	-37.9488	-42.7347	-47.5206	-52.3065
R01142_F	-428.755	-433.062	-437.369	-441.677	-445.984	-450.291	-454.599	-458.906
R01142_R	309.992	302.334	294.677	287.019	279.362	271.704	264.047	256.39
R01143_F	-418.755	-423.062	-427.369	-431.677	-435.984	-440.291	-444.599	-448.906
R01143_R	299.992	292.334	284.677	277.019	269.362	261.704	254.047	246.39
R01144_F	-62.2556	-67.5201	-72.7846	-78.0491	-83.3136	-88.5782	-93.8427	-99.1072
R01144_R	-9.00203	-10.9164	-12.8308	-14.7451	-16.6595	-18.5739	-20.4882	-22.4026
R01147_F	-36.9051	-41.691	-46.4769	-51.2628	-56.0488	-60.8347	-65.6206	-70.4065
R01147_R	-58.1051	-62.891	-67.6769	-72.4628	-77.2488	-82.0347	-86.8206	-91.6065
R01148_F	-59.0051	-63.791	-68.5769	-73.3628	-78.1488	-82.9347	-87.7206	-92.5065
R01148_R	-36.0051	-40.791	-45.5769	-50.3628	-55.1488	-59.9347	-64.7206	-69.5065
R01149_F	-54.5051	-59.291	-64.0769	-68.8628	-73.6488	-78.4347	-83.2206	-88.0065
R01149_R	-40.5051	-45.291	-50.0769	-54.8628	-59.6488	-64.4347	-69.2206	-74.0065
R01150_F	-104.258	-111.436	-118.615	-125.794	-132.973	-140.152	-147.331	-154.51
R01150_R	-38.2576	-45.4365	-52.6154	-59.7943	-66.9731	-74.152	-81.3309	-88.5098
R01151_F	-168.008	-175.666	-183.323	-190.981	-198.638	-206.296	-213.953	-221.61
R01151_R	49.2454	44.9381	40.6308	36.3234	32.0161	27.7088	23.4014	19.0941
R01152_F	-133.759	-141.895	-150.031	-158.167	-166.303	-174.439	-182.575	-190.711
R01152_R	38.7485	37.3127	35.8769	34.4411	33.0054	31.5696	30.1338	28.698
R01154_F	-65.6051	-70.391	-75.1769	-79.9628	-84.7488	-89.5347	-94.3206	-99.1065
R01154_R	-29.4051	-34.191	-38.9769	-43.7628	-48.5488	-53.3347	-58.1206	-62.9065
R01155_F	-39.1051	-43.891	-48.6769	-53.4628	-58.2488	-63.0347	-67.8206	-72.6065
R01155_R	-55.9051	-60.691	-65.4769	-70.2628	-75.0488	-79.8347	-84.6206	-89.4065
R01156_F	-65.6556	-70.9201	-76.1846	-81.4491	-86.7136	-91.9782	-97.2427	-102.507
R01156_R	-5.60203	-7.5164	-9.43077	-11.3451	-13.2595	-15.1739	-17.0882	-19.0026
R01157_F	-112.256	-117.52	-122.785	-128.049	-133.314	-138.578	-143.843	-149.107
R01157_R	40.998	39.0836	37.1692	35.2549	33.3405	31.4261	29.5118	27.5974
R01158_F	-80.0576	-87.2365	-94.4154	-101.594	-108.773	-115.952	-123.131	-130.31
R01158_R	-62.4576	-69.6365	-76.8154	-83.9943	-91.1731	-98.352	-105.531	-112.71
R01160_F	-56.2051	-60.991	-65.7769	-70.5628	-75.3488	-80.1347	-84.9206	-89.7065
R01160_R	-38.8051	-43.591	-48.3769	-53.1628	-57.9488	-62.7347	-67.5206	-72.3065
R01161_F	-39.5051	-44.291	-49.0769	-53.8628	-58.6488	-63.4347	-68.2206	-73.0065
R01161_R	-55.5051	-60.291	-65.0769	-69.8628	-74.6488	-79.4347	-84.2206	-89.0065
R01163_F	-85.5051	-90.291	-95.0769	-99.8628	-104.649	-109.435	-114.221	-119.007
R01163_R	-9.50507	-14.291	-19.0769	-23.8628	-28.6488	-33.4347	-38.2206	-43.0065
R01164_F	-94.2576	-101.436	-108.615	-115.794	-122.973	-130.152	-137.331	-144.51
R01164_R	-48.2576	-55.4365	-62.6154	-69.7943	-76.9731	-84.152	-91.3309	-98.5098
R01166_F	-65.2556	-70.5201	-75.7846	-81.0491	-86.3136	-91.5782	-96.8427	-102.107
R01166_R	-6.00203	-7.9164	-9.83077	-11.7451	-13.6595	-15.5739	-17.4882	-19.4026
R01167_F	-63.2556	-68.5201	-73.7846	-79.0491	-84.3136	-89.5782	-94.8427	-100.107
R01167_R	-8.00203	-9.9164	-11.8308	-13.7451	-15.6595	-17.5739	-19.4882	-21.4026
R01168_F	-33.1556	-38.4201	-43.6846	-48.9491	-54.2136	-59.4782	-64.7427	-70.0072
R01168_R	-38.102	-40.0164	-41.9308	-43.8451	-45.7595	-47.6739	-49.5882	-51.5026
R01171_F	13.9949	9.209	4.42308	-0.362842	-5.14877	-9.93469	-14.7206	-19.5065
R01171_R	-109.005	-113.791	-118.577	-123.363	-128.149	-132.935	-137.721	-142.507
R01172_F	-45.6546	-49.9619	-54.2692	-58.5766	-62.8839	-67.1912	-71.4986	-75.8059
R01172_R	-73.1081	-80.7656	-88.4231	-96.0805	-103.738	-111.396	-119.053	-126.71
R01173_F	-55.2546	-59.5619	-63.8692	-68.1766	-72.4839	-76.7912	-81.0986	-85.4059
R01173_R	-63.5081	-71.1656	-78.8231	-86.4805	-94.138	-101.796	-109.453	-117.11
R01174_F	-7.10507	-11.891	-16.6769	-21.4628	-26.2488	-31.0347	-35.8206	-40.6065
R01174_R	-87.9051	-92.691	-97.4769	-102.263	-107.049	-111.835	-116.621	-121.407
R01175_F	-18.5051	-23.291	-28.0769	-32.8628	-37.6488	-42.4347	-47.2206	-52.0065
R01175_R	-76.5051	-81.291	-86.0769	-90.8628	-95.6488	-100.435	-105.221	-110.007
R01176_F	-83.7576	-90.9365	-98.1154	-105.294	-112.473	-119.652	-126.831	-134.01
R01176_R	-58.7576	-65.9365	-73.1154	-80.2943	-87.4731	-94.652	-101.831	-109.01
R01177_F	-14.8051	-19.591	-24.3769	-29.1628	-33.9488	-38.7347	-43.5206	-48.3065
R01177_R	-80.2051	-84.991	-89.7769	-94.5628	-99.3488	-104.135	-108.921	-113.707
R01179_F	-52.7051	-57.491	-62.2769	-67.0628	-71.8488	-76.6347	-81.4206	-86.2065
R01179_R	-42.3051	-47.091	-51.8769	-56.6628	-61.4488	-66.2347	-71.0206	-75.8065
R01180_F	-18.3051	-23.091	-27.8769	-32.6628	-37.4488	-42.2347	-47.0206	-51.8065
R01180_R	-76.7051	-81.491	-86.2769	-91.0628	-95.8488	-100.635	-105.421	-110.207
R01181_F	-42.4525	-44.8455	-47.2385	-49.6314	-52.0244	-54.4173	-56.8103	-59.2033
R01181_R	-5.05254	-7.4455	-9.83846	-12.2314	-14.6244	-17.0173	-19.4103	-21.8033
R01183_F	-41.5051	-46.291	-51.0769	-55.8628	-60.6488	-65.4347	-70.2206	-75.0065
R01183_R	-53.5051	-58.291	-63.0769	-67.8628	-72.6488	-77.4347	-82.2206	-87.0065
R01184_F	-419.002	-420.916	-422.831	-424.745	-426.66	-428.574	-430.488	-432.403
R01184_R	347.744	342.48	337.215	331.951	326.686	321.422	316.157	310.893
R01185_F	-89.2556	-94.5201	-99.7846	-105.049	-110.314	-115.578	-120.843	-126.107
R01185_R	17.998	16.0836	14.1692	12.2549	10.3405	8.42612	6.51176	4.59739
R01186_F	-89.2556	-94.5201	-99.7846	-105.049	-110.314	-115.578	-120.843	-126.107
R01186_R	17.998	16.0836	14.1692	12.2549	10.3405	8.42612	6.51176	4.59739
R01187_F	-89.2556	-94.5201	-99.7846	-105.049	-110.314	-115.578	-120.843	-126.107
R01187_R	17.998	16.0836	14.1692	12.2549	10.3405	8.42612	6.51176	4.59739
R01192_F	-81.2051	-85.991	-90.7769	-95.5628	-100.349	-105.135	-109.921	-114.707
R01192_R	-13.8051	-18.591	-23.3769	-28.1628	-32.9488	-37.7347	-42.5206	-47.3065
R01194_F	-55.2556	-60.5201	-65.7846	-71.0491	-76.3136	-81.5782	-86.8427	-92.1072
R01194_R	-16.002	-17.9164	-19.8308	-21.7451	-23.6595	-25.5739	-27.4882	-29.4026
R01200_F	-65.0556	-70.3201	-75.5846	-80.8491	-86.1136	-91.3782	-96.6427	-101.907
R01200_R	-6.20203	-8.1164	-10.0308	-11.9451	-13.8595	-15.7739	-17.6882	-19.6026
R01201_F	-54.7051	-59.491	-64.2769	-69.0628	-73.8488	-78.6347	-83.4206	-88.2065
R01201_R	-40.3051	-45.091	-49.8769	-54.6628	-59.4488	-64.2347	-69.0206	-73.8065
R01202_F	-75.0051	-79.791	-84.5769	-89.3628	-94.1488	-98.9347	-103.721	-108.507
R01202_R	-20.0051	-24.791	-29.5769	-34.3628	-39.1488	-43.9347	-48.7206	-53.5065
R01203_F	-215.505	-220.291	-225.077	-229.863	-234.649	-239.435	-244.221	-249.007
R01203_R	120.495	115.709	110.923	106.137	101.351	96.5653	91.7794	86.9935
R01204_F	-66.2051	-70.991	-75.7769	-80.5628	-85.3488	-90.1347	-94.9206	-99.7065
R01204_R	-28.8051	-33.591	-38.3769	-43.1628	-47.9488	-52.7347	-57.5206	-62.3065
R01205_F	-77.7051	-82.491	-87.2769	-92.0628	-96.8488	-101.635	-106.421	-111.207
R01205_R	-17.3051	-22.091	-26.8769	-31.6628	-36.4488	-41.2347	-46.0206	-50.8065
R01207_F	-20.0525	-22.4455	-24.8385	-27.2314	-29.6244	-32.0173	-34.4103	-36.8033
R01207_R	-27.4525	-29.8455	-32.2385	-34.6314	-37.0244	-39.4173	-41.8103	-44.2033
R01209_F	-62.7525	-65.1455	-67.5385	-69.9314	-72.3244	-74.7173	-77.1103	-79.5033
R01209_R	15.2475	12.8545	10.4615	8.06858	5.67562	3.28266	0.889694	-1.50327
R01211_F	-70.0081	-77.6656	-85.3231	-92.9805	-100.638	-108.296	-115.953	-123.61
R01211_R	-48.7546	-53.0619	-57.3692	-61.6766	-65.9839	-70.2912	-74.5986	-78.9059
R01212_F	-40.1081	-47.7656	-55.4231	-63.0805	-70.738	-78.3955	-86.053	-93.7105
R01212_R	-78.6546	-82.9619	-87.2692	-91.5766	-95.8839	-100.191	-104.499	-108.806
R01213_F	-31.0051	-35.791	-40.5769	-45.3628	-50.1488	-54.9347	-59.7206	-64.5065
R01213_R	-64.0051	-68.791	-73.5769	-78.3628	-83.1488	-87.9347	-92.7206	-97.5065
R01214_F	-42.3051	-47.091	-51.8769	-56.6628	-61.4488	-66.2347	-71.0206	-75.8065
R01214_R	-52.7051	-57.491	-62.2769	-67.0628	-71.8488	-76.6347	-81.4206	-86.2065
R01215_F	-36.6051	-41.391	-46.1769	-50.9628	-55.7488	-60.5347	-65.3206	-70.1065
R01215_R	-58.4051	-63.191	-67.9769	-72.7628	-77.5488	-82.3347	-87.1206	-91.9065
R01216_F	-33.2556	-38.5201	-43.7846	-49.0491	-54.3136	-59.5782	-64.8427	-70.1072
R01216_R	-38.002	-39.9164	-41.8308	-43.7451	-45.6595	-47.5739	-49.4882	-51.4026
R01218_F	-34.2051	-38.991	-43.7769	-48.5628	-53.3488	-58.1347	-62.9206	-67.7065
R01218_R	-60.8051	-65.591	-70.3769	-75.1628	-79.9488	-84.7347	-89.5206	-94.3065
R01220_F	-43.8051	-48.591	-53.3769	-58.1628	-62.9488	-67.7347	-72.5206	-77.3065
R01220_R	-51.2051	-55.991	-60.7769	-65.5628	-70.3488	-75.1347	-79.9206	-84.7065
R01221_F	-74.7607	-84.8111	-94.8615	-104.912	-114.962	-125.013	-135.063	-145.114
R01221_R	-91.5071	-98.2074	-104.908	-111.608	-118.308	-125.009	-131.709	-138.409
R01224_F	-5.50507	-10.291	-15.0769	-19.8628	-24.6488	-29.4347	-34.2206	-39.0065
R01224_R	-89.5051	-94.291	-99.0769	-103.863	-108.649	-113.435	-118.221	-123.007
R01225_F	-32.2051	-36.991	-41.7769	-46.5628	-51.3488	-56.1347	-60.9206	-65.7065
R01225_R	-62.8051	-67.591	-72.3769	-77.1628	-81.9488	-86.7347	-91.5206	-96.3065
R01226_F	-29.5051	-34.291	-39.0769	-43.8628	-48.6488	-53.4347	-58.2206	-63.0065
R01226_R	-65.5051	-70.291	-75.0769	-79.8628	-84.6488	-89.4347	-94.2206	-99.0065
R01227_F	-76.2556	-81.5201	-86.7846	-92.0491	-97.3136	-102.578	-107.843	-113.107
R01227_R	4.99797	3.0836	1.16923	-0.745137	-2.65951	-4.57388	-6.48824	-8.40261
R01228_F	-59.2051	-63.991	-68.7769	-73.5628	-78.3488	-83.1347	-87.9206	-92.7065
R01228_R	-35.8051	-40.591	-45.3769	-50.1628	-54.9488	-59.7347	-64.5206	-69.3065
R01229_F	-4.90507	-9.691	-14.4769	-19.2628	-24.0488	-28.8347	-33.6206	-38.4065
R01229_R	-90.1051	-94.891	-99.6769	-104.463	-109.249	-114.035	-118.821	-123.607
R01233_F	-100.056	-105.32	-110.585	-115.849	-121.114	-126.378	-131.643	-136.907
R01233_R	28.798	26.8836	24.9692	23.0549	21.1405	19.2261	17.3118	15.3974
R01238_F	-62.4556	-67.7201	-72.9846	-78.2491	-83.5136	-88.7782	-94.0427	-99.3072
R01238_R	-8.80203	-10.7164	-12.6308	-14.5451	-16.4595	-18.3739	-20.2882	-22.2026
R01240_F	-114.505	-119.291	-124.077	-128.863	-133.649	-138.435	-143.221	-148.007
R01240_R	19.4949	14.709	9.92308	5.13716	0.351235	-4.43469	-9.22061	-14.0065
R01241_F	-5.80203	-7.7164	-9.63077	-11.5451	-13.4595	-15.3739	-17.2882	-19.2026
R01241_R	-65.4556	-70.7201	-75.9846	-81.2491	-86.5136	-91.7782	-97.0427	-102.307
R01244_F	-74.9556	-80.2201	-85.4846	-90.7491	-96.0136	-101.278	-106.543	-111.807
R01244_R	3.69797	1.7836	-0.130768	-2.04514	-3.95951	-5.87388	-7.78824	-9.70261
R01245_F	-72.6556	-77.9201	-83.1846	-88.4491	-93.7136	-98.9782	-104.243	-109.507
R01245_R	1.39797	-0.516398	-2.43077	-4.34514	-6.25951	-8.17388	-10.0882	-12.0026
R01246_F	-16.0051	-20.791	-25.5769	-30.3628	-35.1488	-39.9347	-44.7206	-49.5065
R01246_R	-79.0051	-83.791	-88.5769	-93.3628	-98.1488	-102.935	-107.721	-112.507
R01248_F	12.5949	7.809	3.02308	-1.76284	-6.54877	-11.3347	-16.1206	-20.9065
R01248_R	-107.605	-112.391	-117.177	-121.963	-126.749	-131.535	-136.321	-141.107
R01249_F	-25.6051	-30.391	-35.1769	-39.9628	-44.7488	-49.5347	-54.3206	-59.1065
R01249_R	-69.4051	-74.191	-78.9769	-83.7628	-88.5488	-93.3347	-98.1206	-102.907
R01251_F	2.99493	-1.791	-6.57692	-11.3628	-16.1488	-20.9347	-25.7206	-30.5065
R01251_R	-98.0051	-102.791	-107.577	-112.363	-117.149	-121.935	-126.721	-131.507
R01252_F	-559.258	-566.436	-573.615	-580.794	-587.973	-595.152	-602.331	-609.51
R01252_R	416.742	409.564	402.385	395.206	388.027	380.848	373.669	366.49
R01255_F	-51.7525	-54.1455	-56.5385	-58.9314	-61.3244	-63.7173	-66.1103	-68.5033
R01255_R	4.24746	1.8545	-0.53846	-2.93142	-5.32438	-7.71734	-10.1103	-12.5033
R01256_F	-88.2576	-95.4365	-102.615	-109.794	-116.973	-124.152	-131.331	-138.51
R01256_R	-54.2576	-61.4365	-68.6154	-75.7943	-82.9731	-90.152	-97.3309	-104.51
R01257_F	-45.8051	-50.591	-55.3769	-60.1628	-64.9488	-69.7347	-74.5206	-79.3065
R01257_R	-49.2051	-53.991	-58.7769	-63.5628	-68.3488	-73.1347	-77.9206	-82.7065
R01266_F	-30.2556	-35.5201	-40.7846	-46.0491	-51.3136	-56.5782	-61.8427	-67.1072
R01266_R	-41.002	-42.9164	-44.8308	-46.7451	-48.6595	-50.5739	-52.4882	-54.4026
R01268_F	-60.6556	-65.9201	-71.1846	-76.4491	-81.7136	-86.9782	-92.2427	-97.5072
R01268_R	-10.602	-12.5164	-14.4308	-16.3451	-18.2595	-20.1739	-22.0882	-24.0026
R01270_F	-76.2556	-81.5201	-86.7846	-92.0491	-97.3136	-102.578	-107.843	-113.107
R01270_R	4.99797	3.0836	1.16923	-0.745137	-2.65951	-4.57388	-6.48824	-8.40261
R01271_F	-21.5051	-26.291	-31.0769	-35.8628	-40.6488	-45.4347	-50.2206	-55.0065
R01271_R	-73.5051	-78.291	-83.0769	-87.8628	-92.6488	-97.4347	-102.221	-107.007
R01273_F	-81.5556	-86.8201	-92.0846	-97.3491	-102.614	-107.878	-113.143	-118.407
R01273_R	10.298	8.3836	6.46923	4.55486	2.64049	0.726125	-1.18824	-3.10261
R01274_F	-75.2556	-80.5201	-85.7846	-91.0491	-96.3136	-101.578	-106.843	-112.107
R01274_R	3.99797	2.0836	0.169232	-1.74514	-3.65951	-5.57388	-7.48824	-9.40261
R01277_F	-52.3546	-56.6619	-60.9692	-65.2766	-69.5839	-73.8912	-78.1986	-82.5059
R01277_R	-66.4081	-74.0656	-81.7231	-89.3805	-97.038	-104.696	-112.353	-120.01
R01278_F	29.5949	24.809	20.0231	15.2372	10.4512	5.66531	0.879388	-3.90653
R01278_R	-124.605	-129.391	-134.177	-138.963	-143.749	-148.535	-153.321	-158.107
R01279_F	6.69493	1.909	-2.87692	-7.66284	-12.4488	-17.2347	-22.0206	-26.8065
R01279_R	-101.705	-106.491	-111.277	-116.063	-120.849	-125.635	-130.421	-135.207
R01280_F	-98.2576	-105.436	-112.615	-119.794	-126.973	-134.152	-141.331	-148.51
R01280_R	-44.2576	-51.4365	-58.6154	-65.7943	-72.9731	-80.152	-87.3309	-94.5098
R01281_F	-65.0081	-72.6656	-80.3231	-87.9805	-95.638	-103.296	-110.953	-118.61
R01281_R	-53.7546	-58.0619	-62.3692	-66.6766	-70.9839	-75.2912	-79.5986	-83.9059
R01283_F	-84.7586	-92.8947	-101.031	-109.167	-117.303	-125.439	-133.575	-141.711
R01283_R	-10.2515	-11.6873	-13.1231	-14.5589	-15.9946	-17.4304	-18.8662	-20.302
R01286_F	-91.3586	-99.4947	-107.631	-115.767	-123.903	-132.039	-140.175	-148.311
R01286_R	-3.65152	-5.0873	-6.52308	-7.95885	-9.39463	-10.8304	-12.2662	-13.702
R01287_F	-116.505	-121.291	-126.077	-130.863	-135.649	-140.435	-145.221	-150.007
R01287_R	21.4949	16.709	11.9231	7.13716	2.35123	-2.43469	-7.22061	-12.0065
R01288_F	-111.505	-116.291	-121.077	-125.863	-130.649	-135.435	-140.221	-145.007
R01288_R	16.4949	11.709	6.92308	2.13716	-2.64877	-7.43469	-12.2206	-17.0065
R01289_F	-49.302	-51.2164	-53.1308	-55.0451	-56.9595	-58.8739	-60.7882	-62.7026
R01289_R	-21.9556	-27.2201	-32.4846	-37.7491	-43.0136	-48.2782	-53.5427	-58.8072
R01290_F	-49.302	-51.2164	-53.1308	-55.0451	-56.9595	-58.8739	-60.7882	-62.7026
R01290_R	-21.9556	-27.2201	-32.4846	-37.7491	-43.0136	-48.2782	-53.5427	-58.8072
R01291_F	-67.9556	-73.2201	-78.4846	-83.7491	-89.0136	-94.2782	-99.5427	-104.807
R01291_R	-3.30203	-5.2164	-7.13077	-9.04514	-10.9595	-12.8739	-14.7882	-16.7026
R01292_F	-81.2576	-88.4365	-95.6154	-102.794	-109.973	-117.152	-124.331	-131.51
R01292_R	-61.2576	-68.4365	-75.6154	-82.7943	-89.9731	-97.152	-104.331	-111.51
R01293_F	-76.1051	-80.891	-85.6769	-90.4628	-95.2488	-100.035	-104.821	-109.607
R01293_R	-18.9051	-23.691	-28.4769	-33.2628	-38.0488	-42.8347	-47.6206	-52.4065
R01294_F	-85.7051	-90.491	-95.2769	-100.063	-104.849	-109.635	-114.421	-119.207
R01294_R	-9.30507	-14.091	-18.8769	-23.6628	-28.4488	-33.2347	-38.0206	-42.8065
R01295_F	-481.755	-486.062	-490.369	-494.677	-498.984	-503.291	-507.599	-511.906
R01295_R	362.992	355.334	347.677	340.019	332.362	324.704	317.047	309.39
R01296_F	-493.755	-498.062	-502.369	-506.677	-510.984	-515.291	-519.599	-523.906
R01296_R	374.992	367.334	359.677	352.019	344.362	336.704	329.047	321.39
R01297_F	-533.258	-540.436	-547.615	-554.794	-561.973	-569.152	-576.331	-583.51
R01297_R	390.742	383.564	376.385	369.206	362.027	354.848	347.669	340.49
R01298_F	-483.755	-488.062	-492.369	-496.677	-500.984	-505.291	-509.599	-513.906
R01298_R	364.992	357.334	349.677	342.019	334.362	326.704	319.047	311.39
R01299_F	-523.258	-530.436	-537.615	-544.794	-551.973	-559.152	-566.331	-573.51
R01299_R	380.742	373.564	366.385	359.206	352.027	344.848	337.669	330.49
R01300_F	-81.7576	-88.9365	-96.1154	-103.294	-110.473	-117.652	-124.831	-132.01
R01300_R	-60.7576	-67.9365	-75.1154	-82.2943	-89.4731	-96.652	-103.831	-111.01
R01301_F	-90.9556	-96.2201	-101.485	-106.749	-112.014	-117.278	-122.543	-127.807
R01301_R	19.698	17.7836	15.8692	13.9549	12.0405	10.1261	8.21176	6.29739
R01302_F	98.998	97.0836	95.1692	93.2549	91.3405	89.4261	87.5118	85.5974
R01302_R	-170.256	-175.52	-180.785	-186.049	-191.314	-196.578	-201.843	-207.107
R01304_F	-113.505	-118.291	-123.077	-127.863	-132.649	-137.435	-142.221	-147.007
R01304_R	18.4949	13.709	8.92308	4.13716	-0.648765	-5.43469	-10.2206	-15.0065
R01305_F	-559.905	-564.691	-569.477	-574.263	-579.049	-583.835	-588.621	-593.407
R01305_R	464.895	460.109	455.323	450.537	445.751	440.965	436.179	431.393
R01308_F	-3.75457	-8.0619	-12.3692	-16.6766	-20.9839	-25.2912	-29.5986	-33.9059
R01308_R	-115.008	-122.666	-130.323	-137.981	-145.638	-153.296	-160.953	-168.61
R01322_F	-54.4576	-61.6365	-68.8154	-75.9943	-83.1731	-90.352	-97.5309	-104.71
R01322_R	-88.0576	-95.2365	-102.415	-109.594	-116.773	-123.952	-131.131	-138.31
R01323_F	-26.5051	-31.291	-36.0769	-40.8628	-45.6488	-50.4347	-55.2206	-60.0065
R01323_R	-68.5051	-73.291	-78.0769	-82.8628	-87.6488	-92.4347	-97.2206	-102.007
R01324_F	-7.32254	-9.7155	-12.1085	-14.5014	-16.8944	-19.2873	-21.6803	-24.0733
R01324_R	-40.1825	-42.5755	-44.9685	-47.3614	-49.7544	-52.1473	-54.5403	-56.9333
R01325_F	-11.3525	-13.7455	-16.1385	-18.5314	-20.9244	-23.3173	-25.7103	-28.1033
R01325_R	-36.1525	-38.5455	-40.9385	-43.3314	-45.7244	-48.1173	-50.5103	-52.9033
R01326_F	-58.8051	-63.591	-68.3769	-73.1628	-77.9488	-82.7347	-87.5206	-92.3065
R01326_R	-36.2051	-40.991	-45.7769	-50.5628	-55.3488	-60.1347	-64.9206	-69.7065
R01327_F	-62.6051	-67.391	-72.1769	-76.9628	-81.7488	-86.5347	-91.3206	-96.1065
R01327_R	-32.4051	-37.191	-41.9769	-46.7628	-51.5488	-56.3347	-61.1206	-65.9065
R01329_F	-47.8556	-53.1201	-58.3846	-63.6491	-68.9136	-74.1782	-79.4427	-84.7072
R01329_R	-23.402	-25.3164	-27.2308	-29.1451	-31.0595	-32.9739	-34.8882	-36.8026
R01330_F	-64.4051	-69.191	-73.9769	-78.7628	-83.5488	-88.3347	-93.1206	-97.9065
R01330_R	-30.6051	-35.391	-40.1769	-44.9628	-49.7488	-54.5347	-59.3206	-64.1065
R01333_F	-106.105	-110.891	-115.677	-120.463	-125.249	-130.035	-134.821	-139.607
R01333_R	11.0949	6.309	1.52308	-3.26284	-8.04877	-12.8347	-17.6206	-22.4065
R01334_F	-91.5556	-96.8201	-102.085	-107.349	-112.614	-117.878	-123.143	-128.407
R01334_R	20.298	18.3836	16.4692	14.5549	12.6405	10.7261	8.81176	6.89739
R01335_F	63.598	61.6836	59.7692	57.8549	55.9405	54.0261	52.1118	50.1974
R01335_R	-134.856	-140.12	-145.385	-150.649	-155.914	-161.178	-166.443	-171.707
R01336_F	-81.6556	-86.9201	-92.1846	-97.4491	-102.714	-107.978	-113.243	-118.507
R01336_R	10.398	8.4836	6.56923	4.65486	2.74049	0.826125	-1.08824	-3.00261
R01353_F	-5.10507	-9.891	-14.6769	-19.4628	-24.2488	-29.0347	-33.8206	-38.6065
R01353_R	-89.9051	-94.691	-99.4769	-104.263	-109.049	-113.835	-118.621	-123.407
R01355_F	-61.2556	-66.5201	-71.7846	-77.0491	-82.3136	-87.5782	-92.8427	-98.1072
R01355_R	-10.002	-11.9164	-13.8308	-15.7451	-17.6595	-19.5739	-21.4882	-23.4026
R01357_F	-86.5576	-93.7365	-100.915	-108.094	-115.273	-122.452	-129.631	-136.81
R01357_R	-55.9576	-63.1365	-70.3154	-77.4943	-84.6731	-91.852	-99.0309	-106.21
R01358_F	-86.0556	-91.3201	-96.5846	-101.849	-107.114	-112.378	-117.643	-122.907
R01358_R	14.798	12.8836	10.9692	9.05486	7.14049	5.22612	3.31176	1.39739
R01359_F	-49.9051	-54.691	-59.4769	-64.2628	-69.0488	-73.8347	-78.6206	-83.4065
R01359_R	-45.1051	-49.891	-54.6769	-59.4628	-64.2488	-69.0347	-73.8206	-78.6065
R01360_F	-92.5556	-97.8201	-103.085	-108.349	-113.614	-118.878	-124.143	-129.407
R01360_R	21.298	19.3836	17.4692	15.5549	13.6405	11.7261	9.81176	7.89739
R01361_F	-25.0051	-29.791	-34.5769	-39.3628	-44.1488	-48.9347	-53.7206	-58.5065
R01361_R	-70.0051	-74.791	-79.5769	-84.3628	-89.1488	-93.9347	-98.7206	-103.507
R01364_F	60.998	59.0836	57.1692	55.2549	53.3405	51.4261	49.5118	47.5974
R01364_R	-132.256	-137.52	-142.785	-148.049	-153.314	-158.578	-163.843	-169.107
R01365_F	-50.3051	-55.091	-59.8769	-64.6628	-69.4488	-74.2347	-79.0206	-83.8065
R01365_R	-44.7051	-49.491	-54.2769	-59.0628	-63.8488	-68.6347	-73.4206	-78.2065
R01366_F	-66.2556	-71.5201	-76.7846	-82.0491	-87.3136	-92.5782	-97.8427	-103.107
R01366_R	-5.00203	-6.9164	-8.83077	-10.7451	-12.6595	-14.5739	-16.4882	-18.4026
R01370_F	-5.50507	-10.291	-15.0769	-19.8628	-24.6488	-29.4347	-34.2206	-39.0065
R01370_R	-89.5051	-94.291	-99.0769	-103.863	-108.649	-113.435	-118.221	-123.007
R01371_F	-15.5051	-20.291	-25.0769	-29.8628	-34.6488	-39.4347	-44.2206	-49.0065
R01371_R	-79.5051	-84.291	-89.0769	-93.8628	-98.6488	-103.435	-108.221	-113.007
R01372_F	-553.505	-558.291	-563.077	-567.863	-572.649	-577.435	-582.221	-587.007
R01372_R	458.495	453.709	448.923	444.137	439.351	434.565	429.779	424.993
R01373_F	-109.256	-114.52	-119.785	-125.049	-130.314	-135.578	-140.843	-146.107
R01373_R	37.998	36.0836	34.1692	32.2549	30.3405	28.4261	26.5118	24.5974
R01375_F	-61.0051	-65.791	-70.5769	-75.3628	-80.1488	-84.9347	-89.7206	-94.5065
R01375_R	-34.0051	-38.791	-43.5769	-48.3628	-53.1488	-57.9347	-62.7206	-67.5065
R01376_F	-90.5051	-95.291	-100.077	-104.863	-109.649	-114.435	-119.221	-124.007
R01376_R	-4.50507	-9.291	-14.0769	-18.8628	-23.6488	-28.4347	-33.2206	-38.0065
R01377_F	-78.2556	-83.5201	-88.7846	-94.0491	-99.3136	-104.578	-109.843	-115.107
R01377_R	6.99797	5.0836	3.16923	1.25486	-0.659506	-2.57388	-4.48824	-6.40261
R01378_F	-21.3525	-23.7455	-26.1385	-28.5314	-30.9244	-33.3173	-35.7103	-38.1033
R01378_R	-26.1525	-28.5455	-30.9385	-33.3314	-35.7244	-38.1173	-40.5103	-42.9033
R01381_F	-88.3051	-93.091	-97.8769	-102.663	-107.449	-112.235	-117.021	-121.807
R01381_R	-6.70507	-11.491	-16.2769	-21.0628	-25.8488	-30.6347	-35.4206	-40.2065
R01384_F	-56.2556	-61.5201	-66.7846	-72.0491	-77.3136	-82.5782	-87.8427	-93.1072
R01384_R	-15.002	-16.9164	-18.8308	-20.7451	-22.6595	-24.5739	-26.4882	-28.4026
R01385_F	-25.3525	-27.7455	-30.1385	-32.5314	-34.9244	-37.3173	-39.7103	-42.1033
R01385_R	-22.1525	-24.5455	-26.9385	-29.3314	-31.7244	-34.1173	-36.5103	-38.9033
R01386_F	-51.2556	-56.5201	-61.7846	-67.0491	-72.3136	-77.5782	-82.8427	-88.1072
R01386_R	-20.002	-21.9164	-23.8308	-25.7451	-27.6595	-29.5739	-31.4882	-33.4026
R01387_F	-11.8525	-14.2455	-16.6385	-19.0314	-21.4244	-23.8173	-26.2103	-28.6033
R01387_R	-35.6525	-38.0455	-40.4385	-42.8314	-45.2244	-47.6173	-50.0103	-52.4033
R01388_F	-4.00507	-8.791	-13.5769	-18.3628	-23.1488	-27.9347	-32.7206	-37.5065
R01388_R	-91.0051	-95.791	-100.577	-105.363	-110.149	-114.935	-119.721	-124.507
R01390_F	-30.002	-31.9164	-33.8308	-35.7451	-37.6595	-39.5739	-41.4882	-43.4026
R01390_R	-41.2556	-46.5201	-51.7846	-57.0491	-62.3136	-67.5782	-72.8427	-78.1072
R01392_F	-13.6051	-18.391	-23.1769	-27.9628	-32.7488	-37.5347	-42.3206	-47.1065
R01392_R	-81.4051	-86.191	-90.9769	-95.7628	-100.549	-105.335	-110.121	-114.907
R01393_F	-71.2556	-76.5201	-81.7846	-87.0491	-92.3136	-97.5782	-102.843	-108.107
R01393_R	-0.00202914	-1.9164	-3.83077	-5.74514	-7.65951	-9.57388	-11.4882	-13.4026
R01394_F	-21.7525	-24.1455	-26.5385	-28.9314	-31.3244	-33.7173	-36.1103	-38.5033
R01394_R	-25.7525	-28.1455	-30.5385	-32.9314	-35.3244	-37.7173	-40.1103	-42.5033
R01395_F	-28.1051	-32.891	-37.6769	-42.4628	-47.2488	-52.0347	-56.8206	-61.6065
R01395_R	-66.9051	-71.691	-76.4769	-81.2628	-86.0488	-90.8347	-95.6206	-100.407
R01396_F	-63.5051	-68.291	-73.0769	-77.8628	-82.6488	-87.4347	-92.2206	-97.0065
R01396_R	-31.5051	-36.291	-41.0769	-45.8628	-50.6488	-55.4347	-60.2206	-65.0065
R01397_F	-78.3051	-83.091	-87.8769	-92.6628	-97.4488	-102.235	-107.021	-111.807
R01397_R	-16.7051	-21.491	-26.2769	-31.0628	-35.8488	-40.6347	-45.4206	-50.2065
R01398_F	-87.9051	-92.691	-97.4769	-102.263	-107.049	-111.835	-116.621	-121.407
R01398_R	-7.10507	-11.891	-16.6769	-21.4628	-26.2488	-31.0347	-35.8206	-40.6065
R01399_F	-59.5051	-64.291	-69.0769	-73.8628	-78.6488	-83.4347	-88.2206	-93.0065
R01399_R	-35.5051	-40.291	-45.0769	-49.8628	-54.6488	-59.4347	-64.2206	-69.0065
R01401_F	-80.8556	-86.1201	-91.3846	-96.6491	-101.914	-107.178	-112.443	-117.707
R01401_R	9.59797	7.6836	5.76923	3.85486	1.94049	0.0261246	-1.88824	-3.80261
R01402_F	-39.3051	-44.091	-48.8769	-53.6628	-58.4488	-63.2347	-68.0206	-72.8065
R01402_R	-55.7051	-60.491	-65.2769	-70.0628	-74.8488	-79.6347	-84.4206	-89.2065
R01408_F	22.2475	19.8545	17.4615	15.0686	12.6756	10.2827	7.88969	5.49673
R01408_R	-69.7525	-72.1455	-74.5385	-76.9314	-79.3244	-81.7173	-84.1103	-86.5033
R01411_F	-77.6556	-82.9201	-88.1846	-93.4491	-98.7136	-103.978	-109.243	-114.507
R01411_R	6.39797	4.4836	2.56923	0.654863	-1.25951	-3.17388	-5.08824	-7.00261
R01412_F	-513.258	-520.436	-527.615	-534.794	-541.973	-549.152	-556.331	-563.51
R01412_R	370.742	363.564	356.385	349.206	342.027	334.848	327.669	320.49
R01414_F	-35.1051	-39.891	-44.6769	-49.4628	-54.2488	-59.0347	-63.8206	-68.6065
R01414_R	-59.9051	-64.691	-69.4769	-74.2628	-79.0488	-83.8347	-88.6206	-93.4065
R01415_F	-44.7051	-49.491	-54.2769	-59.0628	-63.8488	-68.6347	-73.4206	-78.2065
R01415_R	-50.3051	-55.091	-59.8769	-64.6628	-69.4488	-74.2347	-79.0206	-83.8065
R01416_F	-87.2556	-92.5201	-97.7846	-103.049	-108.314	-113.578	-118.843	-124.107
R01416_R	15.998	14.0836	12.1692	10.2549	8.34049	6.42612	4.51176	2.59739
R01418_F	40.998	39.0836	37.1692	35.2549	33.3405	31.4261	29.5118	27.5974
R01418_R	-112.256	-117.52	-122.785	-128.049	-133.314	-138.578	-143.843	-149.107
R01419_F	-80.2051	-84.991	-89.7769	-94.5628	-99.3488	-104.135	-108.921	-113.707
R01419_R	-14.8051	-19.591	-24.3769	-29.1628	-33.9488	-38.7347	-43.5206	-48.3065
R01420_F	-89.8051	-94.591	-99.3769	-104.163	-108.949	-113.735	-118.521	-123.307
R01420_R	-5.20507	-9.991	-14.7769	-19.5628	-24.3488	-29.1347	-33.9206	-38.7065
R01421_F	-118.456	-123.72	-128.985	-134.249	-139.514	-144.778	-150.043	-155.307
R01421_R	47.198	45.2836	43.3692	41.4549	39.5405	37.6261	35.7118	33.7974
R01422_F	-78.3576	-85.5365	-92.7154	-99.8943	-107.073	-114.252	-121.431	-128.61
R01422_R	-64.1576	-71.3365	-78.5154	-85.6943	-92.8731	-100.052	-107.231	-114.41
R01424_F	-62.1556	-67.4201	-72.6846	-77.9491	-83.2136	-88.4782	-93.7427	-99.0072
R01424_R	-9.10203	-11.0164	-12.9308	-14.8451	-16.7595	-18.6739	-20.5882	-22.5026
R01425_F	-54.8556	-60.1201	-65.3846	-70.6491	-75.9136	-81.1782	-86.4427	-91.7072
R01425_R	-16.402	-18.3164	-20.2308	-22.1451	-24.0595	-25.9739	-27.8882	-29.8026
R01426_F	-7.75457	-12.0619	-16.3692	-20.6766	-24.9839	-29.2912	-33.5986	-37.9059
R01426_R	-111.008	-118.666	-126.323	-133.981	-141.638	-149.296	-156.953	-164.61
R01429_F	-64.7051	-69.491	-74.2769	-79.0628	-83.8488	-88.6347	-93.4206	-98.2065
R01429_R	-30.3051	-35.091	-39.8769	-44.6628	-49.4488	-54.2347	-59.0206	-63.8065
R01430_F	-74.3051	-79.091	-83.8769	-88.6628	-93.4488	-98.2347	-103.021	-107.807
R01430_R	-20.7051	-25.491	-30.2769	-35.0628	-39.8488	-44.6347	-49.4206	-54.2065
R01431_F	-32.7051	-37.491	-42.2769	-47.0628	-51.8488	-56.6347	-61.4206	-66.2065
R01431_R	-62.3051	-67.091	-71.8769	-76.6628	-81.4488	-86.2347	-91.0206	-95.8065
R01432_F	-20.0525	-22.4455	-24.8385	-27.2314	-29.6244	-32.0173	-34.4103	-36.8033
R01432_R	-27.4525	-29.8455	-32.2385	-34.6314	-37.0244	-39.4173	-41.8103	-44.2033
R01434_F	-30.5081	-38.1656	-45.8231	-53.4805	-61.138	-68.7955	-76.453	-84.1105
R01434_R	-88.2546	-92.5619	-96.8692	-101.177	-105.484	-109.791	-114.099	-118.406
R01437_F	-63.2556	-68.5201	-73.7846	-79.0491	-84.3136	-89.5782	-94.8427	-100.107
R01437_R	-8.00203	-9.9164	-11.8308	-13.7451	-15.6595	-17.5739	-19.4882	-21.4026
R01440_F	-64.2051	-68.991	-73.7769	-78.5628	-83.3488	-88.1347	-92.9206	-97.7065
R01440_R	-30.8051	-35.591	-40.3769	-45.1628	-49.9488	-54.7347	-59.5206	-64.3065
R01441_F	-52.2051	-56.991	-61.7769	-66.5628	-71.3488	-76.1347	-80.9206	-85.7065
R01441_R	-42.8051	-47.591	-52.3769	-57.1628	-61.9488	-66.7347	-71.5206	-76.3065
R01442_F	-193.505	-198.291	-203.077	-207.863	-212.649	-217.435	-222.221	-227.007
R01442_R	98.4949	93.709	88.9231	84.1372	79.3512	74.5653	69.7794	64.9935
R01444_F	-66.0556	-71.3201	-76.5846	-81.8491	-87.1136	-92.3782	-97.6427	-102.907
R01444_R	-5.20203	-7.1164	-9.03077	-10.9451	-12.8595	-14.7739	-16.6882	-18.6026
R01445_F	-21.9525	-24.3455	-26.7385	-29.1314	-31.5244	-33.9173	-36.3103	-38.7033
R01445_R	-25.5525	-27.9455	-30.3385	-32.7314	-35.1244	-37.5173	-39.9103	-42.3033
R01446_F	-86.3051	-91.091	-95.8769	-100.663	-105.449	-110.235	-115.021	-119.807
R01446_R	-8.70507	-13.491	-18.2769	-23.0628	-27.8488	-32.6347	-37.4206	-42.2065
R01447_F	-56.5051	-61.291	-66.0769	-70.8628	-75.6488	-80.4347	-85.2206	-90.0065
R01447_R	-38.5051	-43.291	-48.0769	-52.8628	-57.6488	-62.4347	-67.2206	-72.0065
R01449_F	-46.4051	-51.191	-55.9769	-60.7628	-65.5488	-70.3347	-75.1206	-79.9065
R01449_R	-48.6051	-53.391	-58.1769	-62.9628	-67.7488	-72.5347	-77.3206	-82.1065
R01450_F	-25.3525	-27.7455	-30.1385	-32.5314	-34.9244	-37.3173	-39.7103	-42.1033
R01450_R	-22.1525	-24.5455	-26.9385	-29.3314	-31.7244	-34.1173	-36.5103	-38.9033
R01451_F	-21.5051	-26.291	-31.0769	-35.8628	-40.6488	-45.4347	-50.2206	-55.0065
R01451_R	-73.5051	-78.291	-83.0769	-87.8628	-92.6488	-97.4347	-102.221	-107.007
R01456_F	-31.5051	-36.291	-41.0769	-45.8628	-50.6488	-55.4347	-60.2206	-65.0065
R01456_R	-63.5051	-68.291	-73.0769	-77.8628	-82.6488	-87.4347	-92.2206	-97.0065
R01457_F	7.49493	2.709	-2.07692	-6.86284	-11.6488	-16.4347	-21.2206	-26.0065
R01457_R	-102.505	-107.291	-112.077	-116.863	-121.649	-126.435	-131.221	-136.007
R01459_F	-181.505	-186.291	-191.077	-195.863	-200.649	-205.435	-210.221	-215.007
R01459_R	86.4949	81.709	76.9231	72.1372	67.3512	62.5653	57.7794	52.9935
R01460_F	-65.1556	-70.4201	-75.6846	-80.9491	-86.2136	-91.4782	-96.7427	-102.007
R01460_R	-6.10203	-8.0164	-9.93077	-11.8451	-13.7595	-15.6739	-17.5882	-19.5026
R01465_F	-11.4051	-16.191	-20.9769	-25.7628	-30.5488	-35.3347	-40.1206	-44.9065
R01465_R	-83.6051	-88.391	-93.1769	-97.9628	-102.749	-107.535	-112.321	-117.107
R01466_F	-95.8556	-101.12	-106.385	-111.649	-116.914	-122.178	-127.443	-132.707
R01466_R	24.598	22.6836	20.7692	18.8549	16.9405	15.0261	13.1118	11.1974
R01467_F	-13.2525	-15.6455	-18.0385	-20.4314	-22.8244	-25.2173	-27.6103	-30.0033
R01467_R	-34.2525	-36.6455	-39.0385	-41.4314	-43.8244	-46.2173	-48.6103	-51.0033
R01468_F	-72.4051	-77.191	-81.9769	-86.7628	-91.5488	-96.3347	-101.121	-105.907
R01468_R	-22.6051	-27.391	-32.1769	-36.9628	-41.7488	-46.5347	-51.3206	-56.1065
R01469_F	-177.008	-184.666	-192.323	-199.981	-207.638	-215.296	-222.953	-230.61
R01469_R	58.2454	53.9381	49.6308	45.3234	41.0161	36.7088	32.4014	28.0941
R01471_F	-82.7051	-87.491	-92.2769	-97.0628	-101.849	-106.635	-111.421	-116.207
R01471_R	-12.3051	-17.091	-21.8769	-26.6628	-31.4488	-36.2347	-41.0206	-45.8065
R01473_F	-24.9525	-27.3455	-29.7385	-32.1314	-34.5244	-36.9173	-39.3103	-41.7033
R01473_R	-22.5525	-24.9455	-27.3385	-29.7314	-32.1244	-34.5173	-36.9103	-39.3033
R01476_F	-48.6051	-53.391	-58.1769	-62.9628	-67.7488	-72.5347	-77.3206	-82.1065
R01476_R	-46.4051	-51.191	-55.9769	-60.7628	-65.5488	-70.3347	-75.1206	-79.9065
R01481_F	-32.6051	-37.391	-42.1769	-46.9628	-51.7488	-56.5347	-61.3206	-66.1065
R01481_R	-62.4051	-67.191	-71.9769	-76.7628	-81.5488	-86.3347	-91.1206	-95.9065
R01482_F	-24.9525	-27.3455	-29.7385	-32.1314	-34.5244	-36.9173	-39.3103	-41.7033
R01482_R	-22.5525	-24.9455	-27.3385	-29.7314	-32.1244	-34.5173	-36.9103	-39.3033
R01483_F	-49.4525	-51.8455	-54.2385	-56.6314	-59.0244	-61.4173	-63.8103	-66.2033
R01483_R	1.94746	-0.445498	-2.83846	-5.23142	-7.62438	-10.0173	-12.4103	-14.8033
R01484_F	-46.7525	-49.1455	-51.5385	-53.9314	-56.3244	-58.7173	-61.1103	-63.5033
R01484_R	-0.752536	-3.1455	-5.53846	-7.93142	-10.3244	-12.7173	-15.1103	-17.5033
R01486_F	-76.7051	-81.491	-86.2769	-91.0628	-95.8488	-100.635	-105.421	-110.207
R01486_R	-18.3051	-23.091	-27.8769	-32.6628	-37.4488	-42.2347	-47.0206	-51.8065
R01487_F	-18.3051	-23.091	-27.8769	-32.6628	-37.4488	-42.2347	-47.0206	-51.8065
R01487_R	-76.7051	-81.491	-86.2769	-91.0628	-95.8488	-100.635	-105.421	-110.207
R01488_F	-27.9051	-32.691	-37.4769	-42.2628	-47.0488	-51.8347	-56.6206	-61.4065
R01488_R	-67.1051	-71.891	-76.6769	-81.4628	-86.2488	-91.0347	-95.8206	-100.607
R01489_F	-217.505	-222.291	-227.077	-231.863	-236.649	-241.435	-246.221	-251.007
R01489_R	122.495	117.709	112.923	108.137	103.351	98.5653	93.7794	88.9935
R01490_F	-56.1071	-62.8074	-69.5077	-76.208	-82.9083	-89.6086	-96.3089	-103.009
R01490_R	-110.161	-120.211	-130.262	-140.312	-150.362	-160.413	-170.463	-180.514
R01491_F	-159.505	-164.291	-169.077	-173.863	-178.649	-183.435	-188.221	-193.007
R01491_R	64.4949	59.709	54.9231	50.1372	45.3512	40.5653	35.7794	30.9935
R01505_F	-98.5051	-103.291	-108.077	-112.863	-117.649	-122.435	-127.221	-132.007
R01505_R	3.49493	-1.291	-6.07692	-10.8628	-15.6488	-20.4347	-25.2206	-30.0065
R01506_F	-332.002	-333.916	-335.831	-337.745	-339.66	-341.574	-343.488	-345.403
R01506_R	260.744	255.48	250.215	244.951	239.686	234.422	229.157	223.893
R01507_F	-269.002	-270.916	-272.831	-274.745	-276.66	-278.574	-280.488	-282.403
R01507_R	197.744	192.48	187.215	181.951	176.686	171.422	166.157	160.893
R01511_F	-74.4556	-79.7201	-84.9846	-90.2491	-95.5136	-100.778	-106.043	-111.307
R01511_R	3.19797	1.2836	-0.630768	-2.54514	-4.45951	-6.37388	-8.28824	-10.2026
R01512_F	-28.1051	-32.891	-37.6769	-42.4628	-47.2488	-52.0347	-56.8206	-61.6065
R01512_R	-66.9051	-71.691	-76.4769	-81.2628	-86.0488	-90.8347	-95.6206	-100.407
R01513_F	-7.80507	-12.591	-17.3769	-22.1628	-26.9488	-31.7347	-36.5206	-41.3065
R01513_R	-87.2051	-91.991	-96.7769	-101.563	-106.349	-111.135	-115.921	-120.707
R01514_F	-61.0051	-65.791	-70.5769	-75.3628	-80.1488	-84.9347	-89.7206	-94.5065
R01514_R	-34.0051	-38.791	-43.5769	-48.3628	-53.1488	-57.9347	-62.7206	-67.5065
R01515_F	-107.356	-112.62	-117.885	-123.149	-128.414	-133.678	-138.943	-144.207
R01515_R	36.098	34.1836	32.2692	30.3549	28.4405	26.5261	24.6118	22.6974
R01517_F	-29.7051	-34.491	-39.2769	-44.0628	-48.8488	-53.6347	-58.4206	-63.2065
R01517_R	-65.3051	-70.091	-74.8769	-79.6628	-84.4488	-89.2347	-94.0206	-98.8065
R01518_F	-26.2525	-28.6455	-31.0385	-33.4314	-35.8244	-38.2173	-40.6103	-43.0033
R01518_R	-21.2525	-23.6455	-26.0385	-28.4314	-30.8244	-33.2173	-35.6103	-38.0033
R01519_F	-57.9525	-60.3455	-62.7385	-65.1314	-67.5244	-69.9173	-72.3103	-74.7033
R01519_R	10.4475	8.0545	5.66154	3.26858	0.875617	-1.51734	-3.91031	-6.30327
R01520_F	-45.0051	-49.791	-54.5769	-59.3628	-64.1488	-68.9347	-73.7206	-78.5065
R01520_R	-50.0051	-54.791	-59.5769	-64.3628	-69.1488	-73.9347	-78.7206	-83.5065
R01521_F	-54.6051	-59.391	-64.1769	-68.9628	-73.7488	-78.5347	-83.3206	-88.1065
R01521_R	-40.4051	-45.191	-49.9769	-54.7628	-59.5488	-64.3347	-69.1206	-73.9065
R01522_F	-185.505	-190.291	-195.077	-199.863	-204.649	-209.435	-214.221	-219.007
R01522_R	90.4949	85.709	80.9231	76.1372	71.3512	66.5653	61.7794	56.9935
R01523_F	-80.9051	-85.691	-90.4769	-95.2628	-100.049	-104.835	-109.621	-114.407
R01523_R	-14.1051	-18.891	-23.6769	-28.4628	-33.2488	-38.0347	-42.8206	-47.6065
R01524_F	-19.6051	-24.391	-29.1769	-33.9628	-38.7488	-43.5347	-48.3206	-53.1065
R01524_R	-75.4051	-80.191	-84.9769	-89.7628	-94.5488	-99.3347	-104.121	-108.907
R01525_F	-29.2051	-33.991	-38.7769	-43.5628	-48.3488	-53.1347	-57.9206	-62.7065
R01525_R	-65.8051	-70.591	-75.3769	-80.1628	-84.9488	-89.7347	-94.5206	-99.3065
R01526_F	-71.5051	-76.291	-81.0769	-85.8628	-90.6488	-95.4347	-100.221	-105.007
R01526_R	-23.5051	-28.291	-33.0769	-37.8628	-42.6488	-47.4347	-52.2206	-57.0065
R01528_F	-61.1081	-68.7656	-76.4231	-84.0805	-91.738	-99.3955	-107.053	-114.71
R01528_R	-57.6546	-61.9619	-66.2692	-70.5766	-74.8839	-79.1912	-83.4986	-87.8059
R01529_F	-27.8525	-30.2455	-32.6385	-35.0314	-37.4244	-39.8173	-42.2103	-44.6033
R01529_R	-19.6525	-22.0455	-24.4385	-26.8314	-29.2244	-31.6173	-34.0103	-36.4033
R01530_F	-25.6525	-28.0455	-30.4385	-32.8314	-35.2244	-37.6173	-40.0103	-42.4033
R01530_R	-21.8525	-24.2455	-26.6385	-29.0314	-31.4244	-33.8173	-36.2103	-38.6033
R01535_F	-53.5051	-58.291	-63.0769	-67.8628	-72.6488	-77.4347	-82.2206	-87.0065
R01535_R	-41.5051	-46.291	-51.0769	-55.8628	-60.6488	-65.4347	-70.2206	-75.0065
R01538_F	-52.7525	-55.1455	-57.5385	-59.9314	-62.3244	-64.7173	-67.1103	-69.5033
R01538_R	5.24746	2.8545	0.46154	-1.93142	-4.32438	-6.71734	-9.11031	-11.5033
R01540_F	-59.7525	-62.1455	-64.5385	-66.9314	-69.3244	-71.7173	-74.1103	-76.5033
R01540_R	12.2475	9.8545	7.46154	5.06858	2.67562	0.282656	-2.11031	-4.50327
R01541_F	-72.5051	-77.291	-82.0769	-86.8628	-91.6488	-96.4347	-101.221	-106.007
R01541_R	-22.5051	-27.291	-32.0769	-36.8628	-41.6488	-46.4347	-51.2206	-56.0065
R01542_F	-25.5051	-30.291	-35.0769	-39.8628	-44.6488	-49.4347	-54.2206	-59.0065
R01542_R	-69.5051	-74.291	-79.0769	-83.8628	-88.6488	-93.4347	-98.2206	-103.007
R01543_F	-33.5051	-38.291	-43.0769	-47.8628	-52.6488	-57.4347	-62.2206	-67.0065
R01543_R	-61.5051	-66.291	-71.0769	-75.8628	-80.6488	-85.4347	-90.2206	-95.0065
R01544_F	-77.2556	-82.5201	-87.7846	-93.0491	-98.3136	-103.578	-108.843	-114.107
R01544_R	5.99797	4.0836	2.16923	0.254863	-1.65951	-3.57388	-5.48824	-7.40261
R01547_F	-46.8051	-51.591	-56.3769	-61.1628	-65.9488	-70.7347	-75.5206	-80.3065
R01547_R	-48.2051	-52.991	-57.7769	-62.5628	-67.3488	-72.1347	-76.9206	-81.7065
R01548_F	-57.3051	-62.091	-66.8769	-71.6628	-76.4488	-81.2347	-86.0206	-90.8065
R01548_R	-37.7051	-42.491	-47.2769	-52.0628	-56.8488	-61.6347	-66.4206	-71.2065
R01549_F	-66.5051	-71.291	-76.0769	-80.8628	-85.6488	-90.4347	-95.2206	-100.007
R01549_R	-28.5051	-33.291	-38.0769	-42.8628	-47.6488	-52.4347	-57.2206	-62.0065
R01550_F	-53.2051	-57.991	-62.7769	-67.5628	-72.3488	-77.1347	-81.9206	-86.7065
R01550_R	-41.8051	-46.591	-51.3769	-56.1628	-60.9488	-65.7347	-70.5206	-75.3065
R01555_F	-21.7051	-26.491	-31.2769	-36.0628	-40.8488	-45.6347	-50.4206	-55.2065
R01555_R	-73.3051	-78.091	-82.8769	-87.6628	-92.4488	-97.2347	-102.021	-106.807
R01556_F	-46.5051	-51.291	-56.0769	-60.8628	-65.6488	-70.4347	-75.2206	-80.0065
R01556_R	-48.5051	-53.291	-58.0769	-62.8628	-67.6488	-72.4347	-77.2206	-82.0065
R01557_F	-26.5525	-28.9455	-31.3385	-33.7314	-36.1244	-38.5173	-40.9103	-43.3033
R01557_R	-20.9525	-23.3455	-25.7385	-28.1314	-30.5244	-32.9173	-35.3103	-37.7033
R01558_F	-101.258	-108.436	-115.615	-122.794	-129.973	-137.152	-144.331	-151.51
R01558_R	-41.2576	-48.4365	-55.6154	-62.7943	-69.9731	-77.152	-84.3309	-91.5098
R01559_F	-54.5051	-59.291	-64.0769	-68.8628	-73.6488	-78.4347	-83.2206	-88.0065
R01559_R	-40.5051	-45.291	-50.0769	-54.8628	-59.6488	-64.4347	-69.2206	-74.0065
R01560_F	-75.3556	-80.6201	-85.8846	-91.1491	-96.4136	-101.678	-106.943	-112.207
R01560_R	4.09797	2.1836	0.269232	-1.64514	-3.55951	-5.47388	-7.38824	-9.30261
R01561_F	-39.7051	-44.491	-49.2769	-54.0628	-58.8488	-63.6347	-68.4206	-73.2065
R01561_R	-55.3051	-60.091	-64.8769	-69.6628	-74.4488	-79.2347	-84.0206	-88.8065
R01562_F	-73.7556	-79.0201	-84.2846	-89.5491	-94.8136	-100.078	-105.343	-110.607
R01562_R	2.49797	0.583602	-1.33077	-3.24514	-5.15951	-7.07388	-8.98824	-10.9026
R01563_F	-114.759	-122.895	-131.031	-139.167	-147.303	-155.439	-163.575	-171.711
R01563_R	19.7485	18.3127	16.8769	15.4411	14.0054	12.5696	11.1338	9.69804
R01566_F	-102.256	-107.52	-112.785	-118.049	-123.314	-128.578	-133.843	-139.107
R01566_R	30.998	29.0836	27.1692	25.2549	23.3405	21.4261	19.5118	17.5974
R01567_F	-71.1051	-75.891	-80.6769	-85.4628	-90.2488	-95.0347	-99.8206	-104.607
R01567_R	-23.9051	-28.691	-33.4769	-38.2628	-43.0488	-47.8347	-52.6206	-57.4065
R01568_F	-62.7051	-67.491	-72.2769	-77.0628	-81.8488	-86.6347	-91.4206	-96.2065
R01568_R	-32.3051	-37.091	-41.8769	-46.6628	-51.4488	-56.2347	-61.0206	-65.8065
R01569_F	-64.3556	-69.6201	-74.8846	-80.1491	-85.4136	-90.6782	-95.9427	-101.207
R01569_R	-6.90203	-8.8164	-10.7308	-12.6451	-14.5595	-16.4739	-18.3882	-20.3026
R01570_F	-28.5051	-33.291	-38.0769	-42.8628	-47.6488	-52.4347	-57.2206	-62.0065
R01570_R	-66.5051	-71.291	-76.0769	-80.8628	-85.6488	-90.4347	-95.2206	-100.007
R01571_F	-53.2051	-57.991	-62.7769	-67.5628	-72.3488	-77.1347	-81.9206	-86.7065
R01571_R	-41.8051	-46.591	-51.3769	-56.1628	-60.9488	-65.7347	-70.5206	-75.3065
R01573_F	-64.2051	-68.991	-73.7769	-78.5628	-83.3488	-88.1347	-92.9206	-97.7065
R01573_R	-30.8051	-35.591	-40.3769	-45.1628	-49.9488	-54.7347	-59.5206	-64.3065
R01574_F	-66.3051	-71.091	-75.8769	-80.6628	-85.4488	-90.2347	-95.0206	-99.8065
R01574_R	-28.7051	-33.491	-38.2769	-43.0628	-47.8488	-52.6347	-57.4206	-62.2065
R01575_F	-75.9051	-80.691	-85.4769	-90.2628	-95.0488	-99.8347	-104.621	-109.407
R01575_R	-19.1051	-23.891	-28.6769	-33.4628	-38.2488	-43.0347	-47.8206	-52.6065
R01576_F	-41.4556	-46.7201	-51.9846	-57.2491	-62.5136	-67.7782	-73.0427	-78.3072
R01576_R	-29.802	-31.7164	-33.6308	-35.5451	-37.4595	-39.3739	-41.2882	-43.2026
R01577_F	-18.4525	-20.8455	-23.2385	-25.6314	-28.0244	-30.4173	-32.8103	-35.2033
R01577_R	-29.0525	-31.4455	-33.8385	-36.2314	-38.6244	-41.0173	-43.4103	-45.8033
R01579_F	-81.2556	-86.5201	-91.7846	-97.0491	-102.314	-107.578	-112.843	-118.107
R01579_R	9.99797	8.0836	6.16923	4.25486	2.34049	0.426125	-1.48824	-3.40261
R01580_F	-48.5051	-53.291	-58.0769	-62.8628	-67.6488	-72.4347	-77.2206	-82.0065
R01580_R	-46.5051	-51.291	-56.0769	-60.8628	-65.6488	-70.4347	-75.2206	-80.0065
R01582_F	-41.5051	-46.291	-51.0769	-55.8628	-60.6488	-65.4347	-70.2206	-75.0065
R01582_R	-53.5051	-58.291	-63.0769	-67.8628	-72.6488	-77.4347	-82.2206	-87.0065
R01583_F	-25.4525	-27.8455	-30.2385	-32.6314	-35.0244	-37.4173	-39.8103	-42.2033
R01583_R	-22.0525	-24.4455	-26.8385	-29.2314	-31.6244	-34.0173	-36.4103	-38.8033
R01584_F	-42.0081	-49.6656	-57.3231	-64.9805	-72.638	-80.2955	-87.953	-95.6105
R01584_R	-76.7546	-81.0619	-85.3692	-89.6766	-93.9839	-98.2912	-102.599	-106.906
R01585_F	-109.258	-116.436	-123.615	-130.794	-137.973	-145.152	-152.331	-159.51
R01585_R	-33.2576	-40.4365	-47.6154	-54.7943	-61.9731	-69.152	-76.3309	-83.5098
R01586_F	-49.5051	-54.291	-59.0769	-63.8628	-68.6488	-73.4347	-78.2206	-83.0065
R01586_R	-45.5051	-50.291	-55.0769	-59.8628	-64.6488	-69.4347	-74.2206	-79.0065
R01587_F	-48.2556	-53.5201	-58.7846	-64.0491	-69.3136	-74.5782	-79.8427	-85.1072
R01587_R	-23.002	-24.9164	-26.8308	-28.7451	-30.6595	-32.5739	-34.4882	-36.4026
R01589_F	-103.256	-108.52	-113.785	-119.049	-124.314	-129.578	-134.843	-140.107
R01589_R	31.998	30.0836	28.1692	26.2549	24.3405	22.4261	20.5118	18.5974
R01598_F	-81.1576	-88.3365	-95.5154	-102.694	-109.873	-117.052	-124.231	-131.41
R01598_R	-61.3576	-68.5365	-75.7154	-82.8943	-90.0731	-97.252	-104.431	-111.61
R01600_F	-58.3051	-63.091	-67.8769	-72.6628	-77.4488	-82.2347	-87.0206	-91.8065
R01600_R	-36.7051	-41.491	-46.2769	-51.0628	-55.8488	-60.6347	-65.4206	-70.2065
R01604_F	-78.5051	-83.291	-88.0769	-92.8628	-97.6488	-102.435	-107.221	-112.007
R01604_R	-16.5051	-21.291	-26.0769	-30.8628	-35.6488	-40.4347	-45.2206	-50.0065
R01607_F	-88.5051	-93.291	-98.0769	-102.863	-107.649	-112.435	-117.221	-122.007
R01607_R	-6.50507	-11.291	-16.0769	-20.8628	-25.6488	-30.4347	-35.2206	-40.0065
R01608_F	-15.8051	-20.591	-25.3769	-30.1628	-34.9488	-39.7347	-44.5206	-49.3065
R01608_R	-79.2051	-83.991	-88.7769	-93.5628	-98.3488	-103.135	-107.921	-112.707
R01614_F	-402.525	-426.455	-450.385	-474.314	-498.244	-522.173	-546.103	-570.033
R01614_R	93.7424	86.5635	79.3846	72.2057	65.0269	57.848	50.6691	43.4902
R01615_F	-43.1546	-47.4619	-51.7692	-56.0766	-60.3839	-64.6912	-68.9986	-73.3059
R01615_R	-75.6081	-83.2656	-90.9231	-98.5805	-106.238	-113.896	-121.553	-129.21
R01616_F	-82.0576	-89.2365	-96.4154	-103.594	-110.773	-117.952	-125.131	-132.31
R01616_R	-60.4576	-67.6365	-74.8154	-81.9943	-89.1731	-96.352	-103.531	-110.71
R01617_F	-88.7051	-93.491	-98.2769	-103.063	-107.849	-112.635	-117.421	-122.207
R01617_R	-6.30507	-11.091	-15.8769	-20.6628	-25.4488	-30.2347	-35.0206	-39.8065
R01618_F	-62.5051	-67.291	-72.0769	-76.8628	-81.6488	-86.4347	-91.2206	-96.0065
R01618_R	-32.5051	-37.291	-42.0769	-46.8628	-51.6488	-56.4347	-61.2206	-66.0065
R01620_F	-86.9051	-91.691	-96.4769	-101.263	-106.049	-110.835	-115.621	-120.407
R01620_R	-8.10507	-12.891	-17.6769	-22.4628	-27.2488	-32.0347	-36.8206	-41.6065
R01621_F	-100.105	-104.891	-109.677	-114.463	-119.249	-124.035	-128.821	-133.607
R01621_R	5.09493	0.309004	-4.47692	-9.26284	-14.0488	-18.8347	-23.6206	-28.4065
R01627_F	-133.753	-136.145	-138.538	-140.931	-143.324	-145.717	-148.11	-150.503
R01627_R	86.2475	83.8545	81.4615	79.0686	76.6756	74.2827	71.8897	69.4967
R01628_F	-479.755	-484.062	-488.369	-492.677	-496.984	-501.291	-505.599	-509.906
R01628_R	360.992	353.334	345.677	338.019	330.362	322.704	315.047	307.39
R01629_F	-533.258	-540.436	-547.615	-554.794	-561.973	-569.152	-576.331	-583.51
R01629_R	390.742	383.564	376.385	369.206	362.027	354.848	347.669	340.49
R01630_F	-524.258	-531.436	-538.615	-545.794	-552.973	-560.152	-567.331	-574.51
R01630_R	381.742	374.564	367.385	360.206	353.027	345.848	338.669	331.49
R01631_F	-333.002	-334.916	-336.831	-338.745	-340.66	-342.574	-344.488	-346.403
R01631_R	261.744	256.48	251.215	245.951	240.686	235.422	230.157	224.893
R01632_F	-274.002	-275.916	-277.831	-279.745	-281.66	-283.574	-285.488	-287.403
R01632_R	202.744	197.48	192.215	186.951	181.686	176.422	171.157	165.893
R01633_F	-135.008	-142.666	-150.323	-157.981	-165.638	-173.296	-180.953	-188.61
R01633_R	16.2454	11.9381	7.63077	3.32344	-0.983889	-5.29122	-9.59855	-13.9059
R01634_F	-62.0556	-67.3201	-72.5846	-77.8491	-83.1136	-88.3782	-93.6427	-98.9072
R01634_R	-9.20203	-11.1164	-13.0308	-14.9451	-16.8595	-18.7739	-20.6882	-22.6026
R01635_F	-62.0556	-67.3201	-72.5846	-77.8491	-83.1136	-88.3782	-93.6427	-98.9072
R01635_R	-9.20203	-11.1164	-13.0308	-14.9451	-16.8595	-18.7739	-20.6882	-22.6026
R01639_F	-69.4051	-74.191	-78.9769	-83.7628	-88.5488	-93.3347	-98.1206	-102.907
R01639_R	-25.6051	-30.391	-35.1769	-39.9628	-44.7488	-49.5347	-54.3206	-59.1065
R01641_F	-54.1051	-58.891	-63.6769	-68.4628	-73.2488	-78.0347	-82.8206	-87.6065
R01641_R	-40.9051	-45.691	-50.4769	-55.2628	-60.0488	-64.8347	-69.6206	-74.4065
R01644_F	-39.7051	-44.491	-49.2769	-54.0628	-58.8488	-63.6347	-68.4206	-73.2065
R01644_R	-55.3051	-60.091	-64.8769	-69.6628	-74.4488	-79.2347	-84.0206	-88.8065
R01645_F	-57.1556	-62.4201	-67.6846	-72.9491	-78.2136	-83.4782	-88.7427	-94.0072
R01645_R	-14.102	-16.0164	-17.9308	-19.8451	-21.7595	-23.6739	-25.5882	-27.5026
R01647_F	-14.102	-16.0164	-17.9308	-19.8451	-21.7595	-23.6739	-25.5882	-27.5026
R01647_R	-57.1556	-62.4201	-67.6846	-72.9491	-78.2136	-83.4782	-88.7427	-94.0072
R01648_F	-36.6051	-41.391	-46.1769	-50.9628	-55.7488	-60.5347	-65.3206	-70.1065
R01648_R	-58.4051	-63.191	-67.9769	-72.7628	-77.5488	-82.3347	-87.1206	-91.9065
R01649_F	-164.262	-175.269	-186.277	-197.285	-208.292	-219.3	-230.307	-241.315
R01649_R	45.499	44.5418	43.5846	42.6274	41.6702	40.7131	39.7559	38.7987
R01651_F	-73.2576	-80.4365	-87.6154	-94.7943	-101.973	-109.152	-116.331	-123.51
R01651_R	-69.2576	-76.4365	-83.6154	-90.7943	-97.9731	-105.152	-112.331	-119.51
R01652_F	-0.00202914	-1.9164	-3.83077	-5.74514	-7.65951	-9.57388	-11.4882	-13.4026
R01652_R	-71.2556	-76.5201	-81.7846	-87.0491	-92.3136	-97.5782	-102.843	-108.107
R01655_F	-22.9525	-25.3455	-27.7385	-30.1314	-32.5244	-34.9173	-37.3103	-39.7033
R01655_R	-24.5525	-26.9455	-29.3385	-31.7314	-34.1244	-36.5173	-38.9103	-41.3033
R01657_F	-157.505	-162.291	-167.077	-171.863	-176.649	-181.435	-186.221	-191.007
R01657_R	62.4949	57.709	52.9231	48.1372	43.3512	38.5653	33.7794	28.9935
R01658_F	-129.405	-134.191	-138.977	-143.763	-148.549	-153.335	-158.121	-162.907
R01658_R	34.3949	29.609	24.8231	20.0372	15.2512	10.4653	5.67939	0.893465
R01659_F	-129.405	-134.191	-138.977	-143.763	-148.549	-153.335	-158.121	-162.907
R01659_R	34.3949	29.609	24.8231	20.0372	15.2512	10.4653	5.67939	0.893465
R01660_F	-86.2051	-90.991	-95.7769	-100.563	-105.349	-110.135	-114.921	-119.707
R01660_R	-8.80507	-13.591	-18.3769	-23.1628	-27.9488	-32.7347	-37.5206	-42.3065
R01662_F	-39.7525	-42.1455	-44.5385	-46.9314	-49.3244	-51.7173	-54.1103	-56.5033
R01662_R	-7.75254	-10.1455	-12.5385	-14.9314	-17.3244	-19.7173	-22.1103	-24.5033
R01663_F	-78.8556	-84.1201	-89.3846	-94.6491	-99.9136	-105.178	-110.443	-115.707
R01663_R	7.59797	5.6836	3.76923	1.85486	-0.0595061	-1.97388	-3.88824	-5.80261
R01664_F	-74.0556	-79.3201	-84.5846	-89.8491	-95.1136	-100.378	-105.643	-110.907
R01664_R	2.79797	0.883602	-1.03077	-2.94514	-4.85951	-6.77388	-8.68824	-10.6026
R01665_F	-47.3051	-52.091	-56.8769	-61.6628	-66.4488	-71.2347	-76.0206	-80.8065
R01665_R	-47.7051	-52.491	-57.2769	-62.0628	-66.8488	-71.6347	-76.4206	-81.2065
R01666_F	-61.4051	-66.191	-70.9769	-75.7628	-80.5488	-85.3347	-90.1206	-94.9065
R01666_R	-33.6051	-38.391	-43.1769	-47.9628	-52.7488	-57.5347	-62.3206	-67.1065
R01667_F	-88.1556	-93.4201	-98.6846	-103.949	-109.214	-114.478	-119.743	-125.007
R01667_R	16.898	14.9836	13.0692	11.1549	9.24049	7.32612	5.41176	3.49739
R01668_F	-115.756	-121.02	-126.285	-131.549	-136.814	-142.078	-147.343	-152.607
R01668_R	44.498	42.5836	40.6692	38.7549	36.8405	34.9261	33.0118	31.0974
R01669_F	-35.3051	-40.091	-44.8769	-49.6628	-54.4488	-59.2347	-64.0206	-68.8065
R01669_R	-59.7051	-64.491	-69.2769	-74.0628	-78.8488	-83.6347	-88.4206	-93.2065
R01670_F	-84.2051	-88.991	-93.7769	-98.5628	-103.349	-108.135	-112.921	-117.707
R01670_R	-10.8051	-15.591	-20.3769	-25.1628	-29.9488	-34.7347	-39.5206	-44.3065
R01677_F	-43.9556	-49.2201	-54.4846	-59.7491	-65.0136	-70.2782	-75.5427	-80.8072
R01677_R	-27.302	-29.2164	-31.1308	-33.0451	-34.9595	-36.8739	-38.7882	-40.7026
[truncated: 6,510 more rows]
