# Supplementary material for: Plausibility of Early Life in a Relatively Wide Temperature Range: Clues from Simulated Metabolic Network Expansion
Source: Life (Basel). 2021 Jul 24;11(8):738. doi: 10.3390/life11080738 (PMC8398716; doi:10.3390/life11080738)
Supplement: Supplementary file 1 [file life-11-00738-s001.zip › Table S3.xlsx]

## Sheet: Metabolites
Table S3 Metabolites and reactions at different temperatures
Phosphate-dependent network, free-energy-unknown reactions included
-25 ℃	C03248	C01113	C14180	C00810	C01073	C05364	C03671	C02614	C01401	C00283	C01444	C00103	C02226	C00095	C20986	C02220	C19813	C00631	C00231	C00058	C01563	C01328	C00697	C03453	C00334	C00900	C00898	C01182	C06893	C07272	C00122	C01674	C01548	C05396	C02962	C01231	C00546	C05345	C03557	C00092	C06241	C03233	C00302	C00216	C00209	C06376	C01732	C06031	C02048
0 ℃	C03248	C01113	C14180	C00810	C01073	C05364	C03671	C02614	C01401	C00283	C01444	C00103	C02226	C00095	C20986	C02220	C19813	C00631	C00231	C00058	C01563	C01328	C00697	C03453	C00334	C00900	C00898	C01182	C06893	C07272	C00122	C01674	C01548	C05396	C02962	C01231	C00546	C05345	C03557	C00092	C06241	C03233	C00302	C00216	C00209	C06376	C01732	C06031	C02048
25 ℃	C03248	C01113	C14180	C00810	C01073	C05364	C03671	C02614	C01401	C00283	C01444	C00103	C02226	C00095	C20986	C02220	C19813	C00631	C00231	C00058	C01563	C01328	C00697	C03453	C00334	C00900	C00898	C01182	C06893	C07272	C00122	C01674	C01548	C05396	C02962	C01231	C00546	C05345	C03557	C00092	C06241	C03233	C00302	C00216	C00209	C06376	C01732	C06031	C02048
50 ℃	C03248	C01113	C14180	C00810	C01073	C05364	C03671	C02614	C01401	C00283	C01444	C00103	C02226	C00095	C20986	C02220	C19813	C00631	C00231	C00058	C01563	C01328	C00697	C03453	C00334	C00900	C00898	C01182	C06893	C07272	C00122	C01674	C01548	C05396	C02962	C01231	C00546	C05345	C03557	C00092	C06241	C03233	C00302	C00216	C00209	C06376	C01732	C06031	C02048
75 ℃	C03248	C01113	C14180	C00810	C01073	C05364	C03671	C02614	C01401	C00283	C01444	C00103	C02226	C00095	C20986	C02220	C19813	C00631	C00231	C00058	C01563	C01328	C00697	C03453	C00334	C00900	C00898	C01182	C06893	C07272	C00122	C01674	C01548	C05396	C02962	C01231	C00546	C05345	C03557	C00092	C06241	C03233	C00302	C00216	C00209	C06376	C01732	C06031	C02048
100 ℃	C03248	C01113	C14180	C00810	C01073	C05364	C03671	C02614	C01401	C00283	C01444	C00103	C02226	C00095	C20986	C02220	C19813	C00631	C00231	C00058	C01563	C01328	C00697	C03453	C00334	C00900	C00898	C01182	C06893	C07272	C00122	C01674	C01548	C05396	C02962	C01231	C00546	C05345	C03557	C00092	C06241	C03233	C00302	C00216	C00209	C06376	C01732	C06031	C02048
125 ℃	C03248	C01113	C14180	C00810	C01073	C05364	C03671	C02614	C01401	C00283	C01444	C00103	C02226	C00095	C20986	C02220	C19813	C00631	C00231	C00058	C01563	C01328	C00697	C03453	C00334	C00900	C00898	C01182	C06893	C07272	C00122	C01674	C01548	C05396	C02962	C01231	C00546	C05345	C03557	C00092	C06241	C03233	C00302	C00216	C00209	C06376	C01732	C06031	C06244
150 ℃	C03248	C01113	C14180	C00810	C01073	C05364	C03671	C02614	C01401	C00283	C01444	C00103	C02226	C00095	C20986	C02220	C19813	C00631	C00231	C00058	C01563	C01328	C00697	C03453	C00334	C00900	C00898	C01182	C06893	C07272	C00122	C01674	C01548	C05396	C02962	C01231	C00546	C05345	C03557	C00092	C06241	C03233	C00302	C00216	C00209	C06376	C01732	C06031	C06244
Phosphate-dependent network, free-energy-unknown reactions excluded
-25 ℃	C00184	C03548	C00013	C14180	C01031	C16698	C01417	C00810	C01073	C05364	C02614	C00025	C06032	C02637	C00283	C06393	C01094	C17580	C00048	C02225	C00103	C00250	C02226	C06035	C00095	C00354	C19813	C05600	C00631	C00266	C00689	C00352	C00993	C00231	C00329	C01159	C00232	C00159	C01083	C00257	C03589	C03459	C00058	C04225	C01563	C01286	C01234	C00645	C00267
0 ℃	C00184	C03548	C00013	C14180	C01031	C16698	C01417	C00810	C01073	C05364	C02614	C00025	C06032	C02637	C00283	C01094	C06393	C17580	C00048	C02225	C00103	C00250	C02226	C06035	C00095	C00354	C19813	C00383	C00631	C00266	C05600	C00689	C00352	C00231	C00329	C01159	C00993	C00159	C01083	C00257	C03589	C03459	C00058	C00232	C04225	C01563	C01286	C01234	C00645
25 ℃	C00184	C03548	C00013	C00152	C01031	C14180	C16698	C01417	C00810	C01073	C02946	C05364	C05941	C02614	C00025	C06032	C02637	C00283	C01094	C06393	C17580	C00048	C02225	C00103	C00250	C02226	C06035	C00095	C00354	C19813	C00383	C00631	C00266	C05600	C00689	C00352	C00231	C00329	C01159	C00993	C00159	C01083	C00257	C03589	C03459	C00058	C00232	C04225	C01563
50 ℃	C00184	C03548	C00013	C00152	C01031	C14180	C16698	C01417	C00810	C01073	C02946	C05364	C05941	C02614	C00025	C06032	C02637	C00283	C01094	C06393	C17580	C00048	C02225	C00103	C00250	C02226	C06035	C00095	C00354	C19813	C00383	C00631	C00266	C05600	C00689	C00352	C00231	C00329	C01159	C00993	C00159	C01083	C00257	C03589	C03459	C00058	C00232	C04225	C01563
75 ℃	C00184	C03548	C00013	C00152	C01031	C14180	C16698	C01417	C00810	C01073	C02946	C05364	C05941	C02614	C00025	C06032	C02637	C00283	C01094	C06393	C17580	C00048	C02225	C00103	C00250	C02226	C06035	C00095	C00354	C19813	C00383	C00631	C00266	C05600	C00689	C00352	C00231	C00329	C01159	C00993	C00159	C01083	C00257	C03589	C03459	C00058	C00232	C04225	C01563
100 ℃	C00184	C03548	C00013	C00152	C01031	C14180	C16698	C01417	C00810	C01073	C02946	C05364	C05941	C02614	C00025	C06032	C02637	C00283	C01094	C06393	C17580	C00048	C02225	C00103	C00250	C02226	C06035	C00095	C02220	C00354	C19813	C00383	C00631	C00266	C05600	C00689	C00352	C00231	C00329	C01159	C00993	C00159	C01083	C00257	C03589	C03459	C00058	C00232	C04225
125 ℃	C00184	C03548	C00013	C00152	C01031	C14180	C16698	C01417	C00810	C01073	C02946	C05364	C05941	C02614	C00025	C06032	C02637	C00283	C01094	C06393	C17580	C00048	C02225	C00103	C00250	C02226	C06035	C00095	C02220	C00354	C19813	C00383	C00631	C00266	C05600	C00689	C00352	C00231	C00329	C01159	C00993	C00159	C01083	C00257	C03589	C03459	C00058	C00232	C04225
150 ℃	C00184	C03548	C00013	C00152	C01031	C14180	C16698	C01417	C00810	C01073	C02946	C05364	C05941	C02614	C00025	C06032	C02637	C00283	C01094	C06393	C17580	C00048	C02225	C00103	C00250	C02226	C06035	C00095	C02220	C00354	C19813	C00383	C00631	C00266	C05600	C00689	C00352	C00231	C00329	C01159	C00993	C00159	C01083	C00257	C03589	C03459	C00058	C00232	C04225
Thioester-dependent network, free-energy-unknown reactions included
-25 ℃	C02167	C05231	C03248	C03741	C03761	C00152	C00531	C03680	C01417	C00810	C01073	C00430	C05364	C18323	C01031	C03671	C12367	C00207	C02614	C00025	C20904	C01401	C06032	C06028	C00283	C06393	C02225	C01444	C00048	C20896	C01353	C00798	C20447	C00388	C06114	C16674	C01051	C02331	C02226	C06035	C05135	C20747	C00815	C02220	C03344	C19813	C00383	C00266	C05600
0 ℃	C05231	C03248	C02167	C03741	C03761	C00152	C00531	C03680	C01417	C00810	C01073	C00430	C05364	C18323	C01031	C03671	C12367	C00207	C02614	C00025	C20904	C01401	C06032	C06028	C00283	C06393	C02225	C01444	C00048	C20896	C01353	C00798	C20447	C00388	C06114	C16674	C01051	C02331	C02226	C06035	C05135	C20747	C00815	C02220	C03344	C19813	C00383	C00266	C05600
25 ℃	C05231	C03248	C02167	C03741	C03761	C00152	C00531	C03680	C01417	C00810	C01073	C00430	C18323	C05364	C02946	C03671	C12367	C00207	C05941	C02614	C00025	C20904	C01401	C06032	C06028	C00283	C06393	C02225	C01444	C00048	C20896	C01353	C00798	C20447	C00388	C06114	C16674	C01051	C02331	C02226	C06035	C05135	C20747	C00815	C02220	C03344	C19813	C00383	C00266
50 ℃	C02167	C03248	C05231	C03741	C03761	C00152	C00531	C03680	C01417	C00810	C01073	C00430	C18323	C05364	C02946	C03671	C12367	C00207	C05941	C02614	C00025	C20904	C01401	C06032	C06028	C00283	C06393	C02225	C01444	C00048	C20896	C01353	C00798	C20447	C00388	C06114	C16674	C01051	C02331	C02226	C06035	C05135	C20747	C00815	C02220	C03344	C19813	C00383	C00266
75 ℃	C02167	C03248	C05231	C03741	C03761	C00152	C00531	C03680	C01417	C00810	C01073	C00430	C18323	C05364	C02946	C03671	C12367	C00207	C05941	C02614	C00025	C20904	C01401	C06032	C06028	C00283	C06393	C02225	C01444	C00048	C20896	C01353	C00798	C20447	C00388	C06114	C16674	C01051	C02331	C02226	C06035	C05135	C20747	C00815	C02220	C03344	C19813	C00383	C00266
100 ℃	C02167	C03248	C05231	C03741	C03761	C00152	C00531	C03680	C01417	C00810	C01073	C00430	C18323	C05364	C02946	C03671	C12367	C00207	C05941	C02614	C00025	C20904	C01401	C06032	C06028	C00283	C06393	C02225	C01444	C00048	C20896	C01353	C00798	C20447	C00388	C06114	C16674	C01051	C02331	C02226	C06035	C05135	C20747	C00815	C02220	C03344	C19813	C00383	C00266
125 ℃	C02167	C03248	C05231	C03741	C03761	C00152	C00531	C03680	C01417	C00810	C01073	C00430	C18323	C05364	C02946	C03671	C12367	C00207	C05941	C02614	C00025	C20904	C01401	C06032	C06028	C00283	C06393	C02225	C01444	C00048	C20896	C01353	C00798	C20447	C00388	C06114	C16674	C01051	C02331	C02226	C06035	C05135	C20747	C00815	C02220	C03344	C19813	C00383	C00266
150 ℃	C02167	C03248	C05231	C03741	C03761	C00152	C00531	C03680	C01417	C00810	C01073	C00430	C18323	C05364	C02946	C03671	C12367	C00207	C05941	C02614	C00025	C20904	C01401	C06032	C06028	C00283	C06393	C02225	C01444	C00048	C20896	C01353	C00798	C20447	C00388	C06114	C16674	C01051	C02331	C02226	C06035	C05135	C20747	C00815	C02220	C03344	C19813	C00383	C00266
Thioester-dependent network, free-energy-unknown reactions excluded
-25 ℃	C05231	C03741	C03761	C01031	C00531	C01417	C00810	C01073	C00430	C05364	C18323	C00877	C00207	C02614	C00025	C06032	C06028	C00283	C06393	C02225	C00048	C00798	C02226	C06035	C00815	C03344	C19813	C00383	C00266	C05600	C00993	C00904	C00010	C00232	C00083	C03589	C03459	C01234	C00058	C04225	C01563	C02488	C00001	C02214	C00080	C00697	C01990	C00163	C03453
0 ℃	C05231	C03741	C03761	C01031	C00531	C01417	C00810	C01073	C00430	C05364	C18323	C00877	C00207	C02614	C00025	C06032	C06028	C00283	C06393	C02225	C00048	C00798	C02331	C02226	C06035	C00815	C03344	C19813	C00383	C00266	C05600	C00993	C00904	C00010	C00232	C00083	C03589	C03459	C01234	C00058	C04225	C01563	C02488	C00001	C02214	C00080	C00697	C01990	C00163
25 ℃	C05231	C03741	C00152	C03761	C00531	C01031	C01417	C00810	C01073	C00430	C18323	C05364	C02946	C05941	C00877	C00207	C02614	C00025	C06032	C06028	C00283	C06393	C02225	C00048	C00798	C02331	C02226	C06035	C00815	C03344	C19813	C00383	C00266	C05600	C00993	C00904	C00010	C00232	C00083	C02232	C03589	C03459	C01234	C00058	C04225	C01563	C02488	C00001	C02214
50 ℃	C05231	C03741	C00152	C03761	C00531	C01031	C01417	C00810	C01073	C00430	C18323	C05364	C02946	C05941	C00877	C00207	C02614	C00025	C06032	C06028	C00283	C06393	C02225	C00048	C00798	C02331	C02226	C06035	C00815	C03344	C19813	C00383	C00266	C05600	C16272	C00993	C00904	C00010	C00232	C00083	C02232	C03589	C03459	C01234	C00058	C04225	C01563	C02488	C00001
75 ℃	C05231	C03741	C00152	C03761	C00531	C01031	C01417	C00810	C01073	C00430	C18323	C05364	C02946	C05941	C00877	C00207	C02614	C00025	C06032	C06028	C00283	C06393	C02225	C00048	C00798	C02331	C02226	C06035	C00815	C03344	C19813	C00383	C00266	C05600	C16272	C00993	C00904	C00010	C00232	C00083	C02232	C03589	C03459	C01234	C00058	C04225	C01563	C02488	C00001
100 ℃	C05231	C03741	C00152	C03761	C00531	C01031	C01417	C00810	C01073	C00430	C18323	C05364	C02946	C05941	C00877	C00207	C02614	C00025	C06032	C06028	C00283	C06393	C02225	C00048	C00798	C02331	C02226	C06035	C00815	C02220	C03344	C19813	C00383	C00266	C05600	C16272	C00993	C00904	C00010	C00232	C00083	C02232	C03589	C03459	C01234	C00058	C04225	C01563	C02488
125 ℃	C05231	C03741	C00152	C03761	C00531	C01031	C01417	C00810	C01073	C00430	C18323	C05364	C02946	C05941	C00877	C00207	C02614	C00025	C06032	C06028	C00283	C06393	C02225	C00048	C00798	C02331	C02226	C06035	C00815	C02220	C03344	C19813	C00383	C00266	C05600	C16272	C00993	C00904	C00010	C00232	C00083	C02232	C03589	C03459	C01234	C00058	C04225	C01563	C02488
150 ℃	C05231	C03741	C00152	C03761	C00531	C01031	C01417	C00810	C01073	C00430	C18323	C05364	C02946	C05941	C00877	C00207	C02614	C00025	C06032	C06028	C00283	C06393	C02225	C00048	C00798	C02331	C02226	C06035	C00815	C02220	C03344	C19813	C00383	C00266	C05600	C16272	C00993	C00904	C00010	C00232	C00083	C02232	C03589	C03459	C01234	C00058	C04225	C01563	C02488
ATP-dependent network, free-energy-unknown reactions included
-25 ℃	C03248	C01113	C14180	C00063	C00810	C01073	C05364	C03671	C02614	C01401	C00283	C01444	C00103	C02226	C01283	C20960	C00095	C20986	C02220	C05385	C19813	C00631	C00029	C00008	C00231	C00312	C00058	C01563	C04630	C01328	C00697	C03453	C00334	C00900	C00898	C00052	C00054	C18060	C01182	C00575	C06893	C00212	C00611	C21384	C07272	C00122	C01674	C01548	C05396
0 ℃	C03248	C01113	C14180	C00063	C00810	C01073	C05364	C03671	C02614	C01401	C00283	C01444	C00103	C02226	C01283	C20960	C00095	C20986	C02220	C05385	C19813	C00631	C00029	C00008	C00231	C00312	C00058	C01563	C04630	C01328	C00697	C03453	C00334	C00900	C00898	C00052	C00054	C18060	C01182	C00575	C06893	C00212	C00611	C21384	C07272	C00122	C01674	C01548	C05396
25 ℃	C03248	C01113	C14180	C00063	C00810	C01073	C05364	C03671	C02614	C01401	C00283	C01444	C00103	C02226	C01283	C20960	C00095	C20986	C02220	C05385	C19813	C00631	C00029	C00008	C00231	C00312	C00058	C01563	C04630	C01328	C00697	C03453	C00334	C00900	C00898	C00052	C00054	C18060	C01182	C00575	C06893	C00212	C00611	C21384	C07272	C00122	C01674	C01548	C05396
50 ℃	C03248	C01113	C14180	C00063	C00810	C01073	C05364	C03671	C02614	C01401	C00283	C01444	C00103	C02226	C01283	C20960	C00095	C20986	C02220	C05385	C19813	C00631	C00029	C00008	C00231	C00312	C00058	C01563	C04630	C01328	C00697	C03453	C00334	C00900	C00898	C00052	C00054	C18060	C01182	C00575	C06893	C00212	C00611	C21384	C07272	C00122	C01674	C01548	C05396
75 ℃	C03248	C01113	C14180	C00063	C00810	C01073	C05364	C03671	C02614	C01401	C00283	C01444	C00103	C02226	C01283	C20960	C00095	C20986	C02220	C05385	C19813	C00631	C00029	C00008	C00231	C00312	C00058	C01563	C04630	C01328	C00697	C03453	C00334	C00900	C00898	C00052	C00054	C18060	C01182	C00575	C06893	C00212	C00611	C21384	C07272	C00122	C01674	C01548	C05396
100 ℃	C03248	C01113	C14180	C00063	C00810	C01073	C05364	C03671	C02614	C01401	C00283	C01444	C00103	C02226	C01283	C20960	C00095	C20986	C02220	C05385	C19813	C00631	C00029	C00008	C00231	C00312	C00058	C01563	C04630	C01328	C00697	C03453	C00334	C00900	C00898	C00052	C00054	C18060	C01182	C00575	C06893	C00212	C00611	C21384	C07272	C00122	C01674	C01548	C05396
125 ℃	C03248	C01113	C14180	C00063	C00810	C01073	C05364	C03671	C02614	C01401	C00283	C01444	C00103	C02226	C01283	C20960	C00095	C20986	C02220	C05385	C19813	C00631	C00029	C00008	C00231	C00312	C00058	C01563	C04630	C01328	C00697	C03453	C00334	C00900	C00898	C00052	C00054	C18060	C01182	C00575	C06893	C00212	C00611	C21384	C07272	C00122	C01674	C01548	C05396
150 ℃	C03248	C01113	C14180	C00063	C00810	C01073	C05364	C03671	C02614	C01401	C00283	C01444	C00103	C02226	C01283	C20960	C00095	C20986	C02220	C05385	C19813	C00631	C00029	C00008	C00231	C00312	C00058	C01563	C04630	C01328	C00697	C03453	C00334	C00900	C00898	C00052	C00054	C18060	C01182	C00575	C06893	C00212	C00611	C21384	C07272	C02353	C00122	C01674	C01548
ATP-dependent network, free-energy-unknown reactions excluded
-25 ℃	C01113	C14180	C00063	C00810	C01073	C05364	C02614	C00283	C00103	C02226	C00095	C05385	C19813	C00631	C00029	C00008	C00231	C00312	C00058	C01563	C00697	C03453	C00334	C00900	C00898	C00052	C01182	C00575	C06893	C00212	C00611	C00122	C01674	C05396	C02962	C00130	C01231	C00546	C03906	C05345	C03557	C00092	C06241	C02405	C03233	C03794	C00299	C00302	C02330
0 ℃	C01113	C14180	C00063	C00810	C01073	C05364	C02614	C00283	C00103	C02226	C00095	C05385	C19813	C00631	C00029	C00008	C00231	C00312	C00058	C01563	C00697	C03453	C00334	C00900	C00898	C00052	C01182	C00575	C06893	C00212	C00611	C00122	C01674	C05396	C02962	C00130	C01231	C00546	C03906	C05345	C03557	C00092	C06241	C02405	C03233	C03794	C00299	C00302	C02330
25 ℃	C01113	C14180	C00063	C00810	C01073	C05364	C02614	C00283	C00103	C02226	C00095	C05385	C19813	C00631	C00029	C00008	C00231	C00312	C00058	C01563	C00697	C03453	C00334	C00900	C00898	C00052	C01182	C00575	C06893	C00212	C00611	C00122	C01674	C05396	C02962	C00130	C01231	C00546	C03906	C05345	C03557	C00092	C06241	C02405	C03233	C03794	C00299	C00302	C02330
50 ℃	C01113	C14180	C00063	C00810	C01073	C05364	C02614	C00283	C00103	C02226	C00095	C05385	C19813	C00631	C00029	C00008	C00231	C00312	C00058	C01563	C00697	C03453	C00334	C00900	C00898	C00052	C01182	C00575	C06893	C00212	C00611	C00122	C01674	C05396	C02962	C00130	C01231	C00546	C03906	C05345	C03557	C00092	C06241	C02405	C03233	C03794	C00299	C00302	C02330
75 ℃	C01113	C14180	C00063	C00810	C01073	C05364	C02614	C00283	C00103	C02226	C00095	C05385	C19813	C00631	C00029	C00008	C00231	C00312	C00058	C01563	C00697	C03453	C00334	C00900	C00898	C00052	C01182	C00575	C06893	C00212	C00611	C00122	C01674	C05396	C02962	C00130	C01231	C00546	C03906	C05345	C03557	C00092	C06241	C02405	C03233	C03794	C00299	C00302	C02330
100 ℃	C01113	C14180	C00063	C00810	C01073	C05364	C02614	C00283	C00103	C02226	C00095	C02220	C05385	C19813	C00631	C00029	C00231	C00008	C00312	C00058	C01563	C00697	C03453	C00334	C00900	C00898	C00052	C01182	C00575	C06893	C00212	C00611	C00122	C01674	C05396	C02962	C00130	C01231	C00546	C03906	C05345	C03557	C00092	C06241	C02405	C03233	C03794	C00299	C00302
125 ℃	C01113	C14180	C00063	C00810	C01073	C05364	C02614	C00283	C00103	C02226	C00095	C02220	C05385	C19813	C00631	C00029	C00231	C00008	C00312	C00058	C01563	C00697	C03453	C00334	C00900	C00898	C00052	C01182	C00575	C06893	C00212	C00611	C00122	C01674	C05396	C02962	C00130	C01231	C00546	C03906	C05345	C03557	C00092	C06241	C02405	C03233	C03794	C00299	C00302
150 ℃	C01113	C14180	C00063	C00810	C01073	C05364	C02614	C00283	C00103	C02226	C00095	C02220	C05385	C19813	C00631	C00029	C00231	C00008	C00312	C00058	C01563	C00697	C03453	C00334	C00900	C00898	C00052	C01182	C00575	C06893	C00212	C00611	C02353	C00122	C01674	C05396	C02962	C00130	C01231	C00546	C03906	C05345	C03557	C00092	C06241	C02405	C03233	C03794	C00299
[truncated: 549 more columns]

## Sheet: Reactions
Table S3 Metabolites and reactions at different temperatures
Phosphate-dependent network, free-energy-unknown reactions included
-25 ℃	R08890	R09718	R00350	R01713	R07125	R03801	R01166	R00258	R08193	R07677	R03052	R01650	R05168	R00588	R08639	R05052	R00995	R00661	R01718	R00306	R10205	R07316	R00401	R01621	R09768	R00317	R00260	R04131	R00822	R03350	R11101	R07274	R04053	R00750	R00010	R10972	R01286	R04435	R11333	R01394	R01325	R01782	R09795	R00138	R11083	R00658	R00304	R02949	R00522
0 ℃	R08890	R09718	R00350	R01713	R07125	R03801	R01166	R00258	R08193	R07677	R03052	R01650	R05168	R00588	R08639	R05052	R00995	R00661	R01718	R00306	R10205	R07316	R00401	R01621	R09768	R00317	R00260	R04131	R00822	R03350	R11101	R07274	R04053	R00750	R00010	R02866	R10972	R01286	R04435	R11333	R01394	R09483	R01325	R01782	R09795	R00138	R11083	R00658	R00304
25 ℃	R08890	R09718	R00350	R01713	R07125	R03801	R01166	R00258	R08193	R07677	R03052	R01650	R05168	R00588	R08639	R05052	R00995	R00661	R01718	R00306	R10687	R10205	R07316	R00401	R01621	R09768	R00317	R00260	R04131	R00822	R03350	R11101	R07274	R04053	R00750	R00010	R02866	R10972	R01286	R04435	R11333	R01394	R09483	R01325	R01782	R09795	R00138	R11083	R00658
50 ℃	R08890	R09718	R00350	R01713	R07125	R03801	R01166	R00258	R08193	R07677	R03052	R01650	R05168	R00588	R08639	R05052	R00995	R00661	R01718	R00306	R10687	R10205	R07316	R00401	R01621	R09768	R00317	R00260	R04131	R00822	R03350	R11101	R07274	R04053	R00750	R00010	R02866	R10972	R01286	R04435	R11333	R01394	R09483	R01325	R01782	R09795	R00138	R11083	R00658
75 ℃	R08890	R09718	R00350	R01713	R07125	R03801	R01166	R00258	R08193	R07677	R03052	R01650	R05168	R00588	R08639	R05052	R00995	R00661	R01718	R00306	R10687	R10205	R07316	R00401	R01621	R09768	R00317	R00260	R04131	R00822	R03350	R11101	R07274	R04053	R00750	R00010	R02866	R10972	R01286	R04435	R11333	R01394	R09483	R01325	R01782	R09795	R00138	R11083	R00658
100 ℃	R08890	R09718	R00350	R01713	R07125	R03801	R01166	R00258	R08193	R07677	R03052	R01650	R05168	R00588	R08639	R05052	R00995	R00661	R01718	R00306	R10687	R10205	R07316	R00401	R01621	R03217	R09768	R00317	R00260	R04131	R00822	R03350	R11101	R07274	R04053	R00750	R00010	R02866	R10972	R01286	R04435	R11333	R01394	R09483	R01325	R01782	R09795	R00138	R11083
125 ℃	R08890	R09718	R00350	R01713	R07125	R03801	R01166	R00258	R08193	R07677	R03052	R01650	R05168	R00588	R08639	R05052	R00995	R00661	R01718	R00306	R10687	R10205	R07316	R00401	R01621	R03217	R09768	R00317	R00260	R04131	R00822	R03350	R11101	R07274	R04053	R00750	R00010	R02866	R10972	R01286	R04435	R11333	R01394	R09483	R01325	R01782	R09795	R00138	R11083
150 ℃	R08890	R09718	R00350	R01713	R07125	R03801	R01166	R00258	R08193	R07677	R03052	R01650	R05168	R00588	R08639	R05052	R00995	R00661	R01718	R00306	R10687	R10205	R07316	R00401	R01621	R03217	R09768	R00317	R00260	R04131	R00822	R03350	R11101	R07274	R04053	R00750	R00010	R02866	R10972	R01286	R04435	R11333	R01394	R09483	R01325	R01782	R09795	R00138	R11083
Phosphate-dependent network, free-energy-unknown reactions excluded
-25 ℃	R08890	R09718	R00350	R01713	R07125	R03801	R00258	R08193	R03052	R00588	R08639	R05052	R00995	R00661	R01718	R00306	R07316	R00401	R01621	R00317	R00260	R04131	R00822	R03350	R07274	R04053	R00750	R00010	R01286	R04435	R01394	R01325	R01782	R00658	R00304	R02949	R00522	R00782	R04478	R08195	R02601	R03898	R09532	R00765	R02244	R01012	R03802	R00028	R00024
0 ℃	R08890	R09718	R00350	R01713	R07125	R03801	R00258	R08193	R03052	R00588	R08639	R05052	R00995	R00661	R01718	R00306	R07316	R00401	R01621	R00317	R00260	R04131	R00822	R03350	R07274	R04053	R00750	R00010	R02866	R01286	R04435	R01394	R09483	R01325	R01782	R00658	R00304	R02949	R00522	R00782	R04478	R08195	R02601	R03898	R09532	R00765	R02244	R01012	R03802
25 ℃	R08890	R09718	R00350	R01713	R07125	R03801	R00258	R08193	R03052	R00588	R08639	R05052	R00995	R00661	R01718	R00306	R07316	R00401	R01621	R00317	R00260	R04131	R00822	R03350	R07274	R04053	R00750	R00010	R02866	R01286	R04435	R01394	R09483	R01325	R01782	R00658	R00304	R02949	R00522	R00782	R04478	R08195	R02601	R03898	R09532	R00765	R02244	R01012	R03802
50 ℃	R08890	R09718	R00350	R01713	R07125	R03801	R00258	R08193	R03052	R00588	R08639	R05052	R00995	R00661	R01718	R00306	R07316	R00401	R01621	R00317	R00260	R04131	R00822	R03350	R07274	R04053	R00750	R00010	R02866	R01286	R04435	R01394	R09483	R01325	R01782	R00658	R00304	R02949	R00522	R00782	R04478	R08195	R02601	R03898	R09532	R00765	R02244	R01012	R03802
75 ℃	R08890	R09718	R00350	R01713	R07125	R03801	R00258	R08193	R03052	R00588	R08639	R05052	R00995	R00661	R01718	R00306	R07316	R00401	R01621	R00317	R00260	R04131	R00822	R03350	R07274	R04053	R00750	R00010	R02866	R01286	R04435	R01394	R09483	R01325	R01782	R00658	R00304	R02949	R00522	R00782	R04478	R08195	R02601	R03898	R09532	R00765	R02244	R01012	R03802
100 ℃	R08890	R09718	R00350	R01713	R07125	R03801	R00258	R08193	R03052	R00588	R08639	R05052	R00995	R00661	R01718	R00306	R07316	R00401	R01621	R03217	R00317	R00260	R04131	R00822	R03350	R07274	R04053	R00750	R00010	R02866	R01286	R04435	R01394	R09483	R01325	R01782	R00658	R00304	R02949	R00522	R00782	R04478	R08195	R02601	R03898	R03887	R09532	R00765	R02244
125 ℃	R08890	R09718	R00350	R01713	R07125	R03801	R00258	R08193	R03052	R00588	R08639	R05052	R00995	R00661	R01718	R00306	R07316	R00401	R01621	R03217	R00317	R00260	R04131	R00822	R03350	R07274	R04053	R00750	R00010	R02866	R01286	R04435	R01394	R09483	R01325	R01782	R00658	R00304	R02949	R00522	R00782	R04478	R08195	R02601	R03898	R03887	R09532	R00765	R02244
150 ℃	R08890	R09718	R00350	R01713	R07125	R03801	R00258	R08193	R03052	R00588	R08639	R05052	R00995	R00661	R01718	R00306	R07316	R00401	R01621	R03217	R00317	R00260	R04131	R00822	R03350	R07274	R04053	R00750	R00010	R02866	R01286	R04435	R01394	R09483	R01325	R01782	R00658	R00304	R02949	R00522	R00782	R04478	R08195	R02601	R03898	R03887	R09532	R00765	R02244
Thioester-dependent network, free-energy-unknown reactions included
-25 ℃	R00928	R09718	R00350	R01166	R00258	R03052	R00472	R01650	R00588	R05052	R00995	R00473	R10687	R02152	R09527	R10965	R10564	R07316	R00401	R10612	R05595	R11334	R00260	R04131	R07290	R11101	R00750	R00371	R01286	R05076	R01394	R00399	R09483	R01325	R01782	R09795	R11083	R02949	R00522	R00782	R04478	R03276	R02846	R08195	R02601	R03898	R03887	R11264	R05509
0 ℃	R00928	R09718	R00350	R01166	R00258	R03052	R00472	R01650	R00588	R05052	R00995	R00473	R10687	R02152	R09527	R10965	R10564	R07316	R00401	R10612	R05595	R11334	R00260	R04131	R07290	R11101	R00750	R00371	R01286	R05076	R01394	R00399	R09483	R01325	R01782	R09795	R11083	R02949	R00522	R00782	R04478	R03276	R02846	R08195	R02601	R03898	R03887	R11264	R05509
25 ℃	R00928	R09718	R00350	R01166	R00258	R03052	R00472	R01650	R00588	R05052	R03959	R00995	R00473	R10687	R02152	R09527	R10965	R10564	R07316	R00401	R10612	R05595	R11334	R00260	R04131	R07290	R11101	R00750	R00371	R01286	R05076	R01394	R00399	R09483	R01325	R01782	R09795	R11083	R02949	R00522	R00782	R04478	R03276	R02846	R08195	R02601	R03898	R03887	R11264
50 ℃	R00928	R09718	R00350	R01166	R00258	R03052	R00472	R01650	R00588	R05052	R00995	R03959	R00473	R10687	R02152	R09527	R10965	R10564	R07316	R00401	R10612	R05595	R11334	R00260	R04131	R07290	R11101	R00750	R00371	R01286	R05076	R01394	R00399	R09483	R01325	R01782	R09795	R11083	R02949	R00522	R00782	R04478	R03276	R02846	R08195	R02601	R03898	R03887	R11264
75 ℃	R00928	R09718	R00350	R01166	R00258	R03052	R00472	R01650	R00588	R05052	R00995	R03959	R00473	R10687	R02152	R09527	R10965	R10564	R07316	R00401	R10612	R05595	R11334	R03217	R00260	R04131	R07290	R11101	R00750	R00371	R01286	R05076	R01394	R00399	R09483	R01325	R01782	R09795	R11083	R02949	R00522	R00782	R04478	R03276	R02846	R08195	R02601	R03898	R03887
100 ℃	R00928	R09718	R00350	R01166	R00258	R03052	R00472	R01650	R00588	R05052	R00995	R03959	R00473	R10687	R02152	R09527	R10965	R10564	R07316	R00401	R10612	R05595	R11334	R03217	R00260	R04131	R07290	R11101	R00750	R00371	R01286	R05076	R01394	R00399	R09483	R01325	R01782	R09795	R11083	R02949	R00522	R00782	R04478	R03276	R02846	R08195	R02601	R03898	R03887
125 ℃	R00928	R09718	R00350	R01166	R00258	R03052	R00472	R01650	R00588	R05052	R00995	R03959	R00473	R10687	R02152	R09527	R10965	R10564	R07316	R00401	R10612	R05595	R11334	R03217	R00260	R04131	R07290	R11101	R00750	R00371	R01286	R05076	R01394	R00399	R09483	R01325	R01782	R09795	R11083	R02949	R00522	R00782	R04478	R03276	R02846	R08195	R02601	R03898	R03887
150 ℃	R00928	R09718	R00350	R01166	R00258	R03052	R00472	R01650	R00588	R05052	R00995	R03959	R00473	R10687	R02152	R09527	R10965	R10564	R07316	R00401	R10612	R05595	R11334	R03217	R00260	R04131	R07290	R11101	R00750	R00371	R01286	R05076	R01394	R00399	R09483	R01325	R01782	R09795	R11083	R02949	R00522	R00782	R04478	R03276	R02846	R08195	R02601	R03898	R03887
Thioester-dependent network, free-energy-unknown reactions excluded
-25 ℃	R04132	R00928	R05551	R09718	R00256	R00350	R00217	R01087	R00084	R00325	R05078	R02279	R02271	R00830	R00338	R00258	R03693	R00521	R00369	R01583	R03052	R07419	R00472	R04482	R01450	R00588	R00891	R02491	R03758	R01467	R05052	R04447	R03026	R00995	R00195	R01579	R00473	R00590	R06171	R01447	R00903	R04000	R01393	R00494	R09094	R00347	R03908	R01359	R09527
0 ℃	R04132	R00928	R05551	R09718	R00256	R00350	R00217	R01087	R00084	R00325	R05078	R02279	R02271	R00830	R00338	R00258	R03693	R00521	R00369	R01583	R03052	R07419	R00472	R04482	R01450	R00588	R00891	R02491	R03758	R01467	R05052	R04447	R03026	R00995	R00195	R01579	R00473	R00590	R06171	R01447	R00903	R04000	R01393	R00494	R09094	R00347	R03908	R01359	R09527
25 ℃	R04132	R00928	R06989	R05551	R09718	R00256	R00350	R00217	R01087	R00084	R00325	R05078	R02279	R02271	R00830	R00338	R00258	R03693	R00521	R00369	R01583	R03052	R07419	R00472	R04482	R01450	R00588	R00891	R02491	R03758	R01467	R05052	R04447	R03026	R03959	R00995	R00195	R01579	R00473	R09253	R00590	R06171	R01447	R00903	R04000	R01393	R00494	R09094	R00347
50 ℃	R04132	R00928	R06989	R05551	R09718	R00256	R00350	R00217	R01087	R00084	R00325	R05078	R02279	R02271	R00830	R00338	R00258	R03693	R07832	R00521	R00369	R01583	R03052	R07419	R00472	R04482	R01450	R00588	R00891	R02491	R03758	R01467	R05052	R04447	R03026	R00995	R03959	R00195	R01579	R00473	R09253	R00590	R06171	R01447	R00903	R04000	R01393	R00494	R09094
75 ℃	R04132	R00928	R06989	R05551	R09718	R00256	R00350	R00217	R01087	R00084	R00325	R05078	R02279	R02271	R00830	R00338	R00258	R03693	R07832	R00521	R00369	R01583	R03052	R07419	R00472	R04482	R01450	R00588	R00891	R02491	R03758	R01467	R05052	R04447	R03026	R00995	R03959	R00195	R01579	R00473	R09253	R00590	R06171	R01447	R00903	R04000	R01393	R00494	R09094
100 ℃	R04132	R00928	R06989	R05551	R09718	R00256	R00350	R00217	R01087	R00084	R00325	R05078	R02279	R02271	R00830	R00338	R00258	R03693	R07832	R00521	R00369	R01583	R03052	R07419	R00472	R04482	R01450	R00588	R00891	R02491	R03758	R01467	R05052	R04447	R03026	R00995	R03959	R00195	R01579	R00473	R09253	R00590	R06171	R01447	R00903	R04000	R01393	R00494	R09094
125 ℃	R04132	R00928	R06989	R05551	R09718	R00256	R00350	R00217	R01087	R00084	R00325	R09126	R05078	R02271	R02279	R00830	R00338	R00258	R03693	R07832	R00521	R00369	R01583	R03052	R07419	R00472	R04482	R01450	R00588	R00891	R02491	R03758	R01467	R05052	R04447	R03026	R00995	R03959	R00195	R01579	R00473	R09253	R00590	R06171	R01447	R00903	R04000	R01393	R00494
150 ℃	R04132	R00928	R06989	R05551	R09718	R00256	R00350	R00217	R01087	R00084	R00325	R09126	R05078	R02271	R02279	R00830	R00338	R00258	R03693	R07832	R00521	R00369	R01583	R03052	R07419	R00472	R04482	R01450	R00588	R00891	R02491	R03758	R01467	R05052	R04447	R03026	R00995	R03959	R00195	R01579	R00473	R09253	R00590	R06171	R01447	R00903	R04000	R01393	R00494
ATP-dependent network, free-energy-unknown reactions included
-25 ℃	R06531	R01126	R00660	R02099	R08890	R09718	R01902	R00350	R01713	R02705	R07125	R00503	R03920	R03801	R01166	R01663	R00258	R05805	R01051	R08193	R01387	R01526	R01071	R02137	R00724	R07677	R03052	R04209	R01843	R01650	R06836	R05168	R00588	R08639	R00726	R05052	R00659	R00995	R00661	R00127	R01386	R00962	R00306	R01718	R01678	R10205	R05647	R00123	R10183
0 ℃	R06531	R01126	R00660	R02099	R08890	R09718	R01902	R00350	R01713	R02705	R07125	R00503	R03920	R03801	R01166	R01663	R00258	R05805	R01051	R08193	R01387	R01526	R01071	R02137	R00724	R07677	R03052	R04209	R01843	R01650	R06836	R05168	R00588	R08639	R00726	R05052	R00659	R00995	R00661	R00127	R01386	R00962	R00306	R01718	R01678	R10205	R05647	R00123	R10183
25 ℃	R06531	R01126	R00660	R02099	R08890	R09718	R01902	R00350	R01713	R02705	R07125	R00503	R03920	R03801	R01166	R01663	R00258	R05805	R01051	R08193	R01387	R01526	R01071	R02137	R00724	R07677	R03052	R04209	R01843	R01650	R06836	R05168	R00588	R08639	R00726	R05052	R00659	R00995	R00661	R00127	R01386	R00962	R00306	R01718	R10687	R01678	R10205	R05647	R00123
50 ℃	R06531	R01126	R00660	R02099	R08890	R09718	R01902	R00350	R01713	R02705	R07125	R00503	R03920	R03801	R01166	R01663	R00258	R05805	R01051	R08193	R01387	R01526	R01071	R02137	R00724	R07677	R03052	R04209	R01843	R01650	R06836	R05168	R00588	R08639	R00726	R05052	R00659	R00995	R00661	R00127	R01386	R00962	R00306	R01718	R10687	R01678	R10205	R05647	R00123
75 ℃	R06531	R01126	R00660	R02099	R08890	R09718	R01902	R00350	R01713	R02705	R07125	R00503	R03920	R03801	R01166	R01663	R00258	R05805	R01051	R08193	R01387	R01526	R01071	R02137	R00724	R07677	R03052	R04209	R01843	R01650	R06836	R05168	R00588	R08639	R00726	R05052	R00659	R00995	R00661	R00127	R01386	R00962	R00306	R01718	R10687	R01678	R10205	R05647	R00123
100 ℃	R06531	R01126	R00660	R02099	R08890	R09718	R01902	R00350	R01713	R02705	R07125	R00503	R03920	R03801	R01166	R01663	R00258	R05805	R01051	R08193	R01387	R01526	R01071	R02137	R00724	R07677	R03052	R04209	R01843	R01650	R06836	R05168	R00588	R08639	R00726	R05052	R00659	R00995	R00661	R00127	R01386	R00962	R00306	R01718	R10687	R01678	R10205	R05647	R00123
125 ℃	R06531	R01126	R00660	R02099	R08890	R09718	R01902	R00350	R01713	R02705	R07125	R00503	R03920	R03801	R01166	R01663	R00258	R05805	R01051	R08193	R01387	R01526	R01071	R02137	R00724	R07677	R03052	R04209	R01843	R01650	R06836	R05168	R00588	R08639	R00726	R05052	R00659	R00995	R00661	R00127	R01386	R00962	R00306	R01718	R10687	R01678	R10205	R05647	R00123
150 ℃	R06531	R01126	R00660	R02099	R08890	R09718	R01902	R00350	R01713	R02705	R07125	R00503	R03920	R03801	R01166	R01663	R00258	R05805	R01051	R08193	R01387	R01526	R01071	R02137	R00724	R07677	R03052	R04209	R01843	R01650	R06836	R05168	R00588	R08639	R00726	R05052	R00659	R00995	R00661	R00127	R01386	R00962	R00306	R01718	R10687	R01678	R10205	R05647	R00123
ATP-dependent network, free-energy-unknown reactions excluded
-25 ℃	R06531	R00660	R01126	R08890	R09718	R01902	R00350	R01713	R02705	R07125	R00503	R03920	R03801	R00258	R05805	R01051	R08193	R01387	R01526	R02137	R00724	R03052	R01843	R06836	R05168	R00588	R08639	R00726	R05052	R00659	R00995	R00661	R00127	R01386	R00962	R00306	R01678	R01718	R05647	R00123	R00769	R01983	R02737	R07316	R00974	R01844	R00401	R00149	R00483
0 ℃	R06531	R00660	R01126	R08890	R09718	R01902	R00350	R01713	R02705	R07125	R00503	R03920	R03801	R00258	R05805	R01051	R08193	R01387	R01526	R02137	R00724	R03052	R04209	R01843	R06836	R05168	R00588	R08639	R00726	R05052	R00659	R00995	R00661	R00127	R01386	R00962	R00306	R01678	R01718	R05647	R00123	R00769	R01983	R02737	R07316	R00974	R01844	R00401	R07405
25 ℃	R06531	R00660	R02099	R01126	R08890	R09718	R01902	R00350	R01713	R02705	R07125	R00503	R03920	R03801	R01663	R00258	R05805	R01051	R08193	R01387	R01526	R02137	R00724	R03052	R04209	R01843	R06836	R05168	R00588	R08639	R00726	R05052	R00659	R00995	R00661	R00127	R01386	R00962	R00306	R01678	R01718	R05647	R00123	R00769	R01983	R02737	R07316	R00974	R01844
50 ℃	R06531	R01126	R00660	R02099	R08890	R09718	R01902	R00350	R01713	R02705	R07125	R00503	R03920	R03801	R01663	R00258	R05805	R01051	R08193	R01387	R01526	R02137	R00724	R03052	R04209	R01843	R06836	R05168	R00588	R08639	R00726	R05052	R00659	R00995	R00661	R00127	R01386	R00962	R00306	R01718	R01678	R05647	R00123	R00769	R01983	R02737	R00974	R07316	R01844
75 ℃	R06531	R01126	R00660	R02099	R08890	R09718	R01902	R00350	R01713	R02705	R07125	R00503	R03920	R03801	R01663	R00258	R05805	R01051	R08193	R01387	R01526	R02137	R00724	R03052	R04209	R01843	R06836	R05168	R00588	R08639	R00726	R05052	R00659	R00995	R00661	R00127	R01386	R00962	R00306	R01718	R01678	R05647	R00123	R00769	R01983	R02737	R00974	R07316	R01844
100 ℃	R06531	R01126	R00660	R02099	R08890	R09718	R01902	R00350	R01713	R02705	R07125	R00503	R03920	R03801	R01663	R00258	R05805	R01051	R08193	R01387	R01526	R02137	R00724	R03052	R04209	R01843	R06836	R05168	R00588	R08639	R00726	R05052	R00659	R00995	R00661	R00127	R01386	R00962	R00306	R01718	R01678	R05647	R00123	R00769	R01983	R02737	R00974	R07316	R01844
125 ℃	R06531	R01126	R00660	R02099	R08890	R09718	R01902	R00350	R01713	R02705	R07125	R00503	R03920	R03801	R01663	R00258	R05805	R01051	R08193	R01387	R01526	R02137	R00724	R03052	R04209	R01843	R06836	R05168	R00588	R08639	R00726	R05052	R00659	R00995	R00661	R00127	R01386	R00962	R00306	R01718	R01678	R05647	R00123	R00769	R01983	R02737	R00974	R07316	R01844
150 ℃	R06531	R01126	R00660	R02099	R08890	R09718	R01902	R00350	R01713	R02705	R07125	R00503	R03920	R03801	R01663	R00258	R05805	R01051	R08193	R01387	R01526	R02137	R00724	R03052	R04209	R01843	R06836	R05168	R00588	R08639	R00726	R05052	R00659	R00995	R00661	R00127	R01386	R00962	R00306	R01718	R01678	R05647	R00123	R00769	R01983	R02737	R00974	R07316	R01844
[truncated: 857 more columns]
