# Supplementary material for: Plausibility of Early Life in a Relatively Wide Temperature Range: Clues from Simulated Metabolic Network Expansion
Source: Life (Basel). 2021 Jul 24;11(8):738. doi: 10.3390/life11080738 (PMC8398716; doi:10.3390/life11080738)
Supplement: Supplementary file 1 [file life-11-00738-s001.zip › Table S4.xlsx]

## Sheet: Sheet1
Table S4 Metabolite numbers when certain reactions were removed from the background metabolism pool
Phosphate-dependent network, free-energy-unknown reactions included
Removed reactions	R00325_R	R03693_F	R03696_R	R00262_F	R02059_R	R00362_R	R00874_F	R02087_F	R01519_F	R01826_F	R01087_R	R01538_F	R03083_F	R00008_R	R00350_R	R00479_F	R01207_R	R01530_R	R03084_F	R00750_F	R00899_R	R01444_R	R01627_F	R01818_F	R02754_R	R03254_R	R00409_R	R00494_R	R00614_F	R00661_F	R01393_F	R03350_F	R03801_R	R03995_R	R05850_R	R00877_R	R00960_F	R01576_F	R01751_R	R02280_R	R03244_F	R03802_R	R03896_F	R04425_F	R08570_F	R00470_R	R00471_R	R00822_F	R01577_F
Number of metabolites	306	307	309	310	347	349	349	350	351	352	353	353	353	354	354	354	354	354	354	355	355	355	355	355	355	355	356	356	356	356	356	356	356	356	356	357	357	357	357	357	357	357	357	357	357	358	358	358	358
Phosphate-dependent network, free-energy-unknown reactions excluded
Removed reactions	R00874_F	R01519_F	R01538_F	R08570_F	R00325_R	R03693_F	R03696_R	R00262_F	R00362_R	R00658_R	R02059_R	R01826_F	R01440_R	R02087_F	R03083_F	R00008_R	R01530_R	R03084_F	R00350_R	R00479_F	R00899_R	R01444_R	R01627_F	R03254_R	R00494_R	R00661_F	R00750_F	R00803_R	R01393_F	R01518_F	R03350_F	R03801_R	R03995_R	R07456_F	R00409_R	R00614_F	R00960_F	R01087_R	R01207_R	R01576_F	R01751_R	R03802_R	R03896_F	R05850_R	R00470_R	R00471_R	R00822_F	R01016_F	R01577_F
Number of metabolites	85	87	88	89	219	220	222	223	248	248	248	250	251	251	251	252	252	252	253	253	253	253	253	253	254	254	254	254	254	254	254	254	254	254	255	255	255	255	255	255	255	255	255	255	256	256	256	256	256
Thioester-dependent network, free-energy-unknown reactions included
Removed reactions	R00212_F	R03696_R	R00262_F	R00932_R	R01408_R	R04000_F	R03937_R	R03028_F	R00830_F	R02914_F	R01087_R	R01168_R	R02963_F	R00036_F	R00084_F	R00350_R	R00750_F	R01355_R	R01450_F	R02754_R	R00899_R	R03069_R	R00271_F	R00487_F	R00494_R	R01393_F	R01978_R	R02280_R	R03070_R	R03896_F	R05509_R	R00008_R	R00371_F	R00470_R	R00471_R	R01161_F	R01167_F	R01366_F	R02419_R	R02948_F	R03030_R	R03045_R	R03106_F	R03540_F	R03908_R	R03966_R	R04447_F	R08648_F	R00132_R
Number of metabolites	42	228	229	272	273	273	274	276	278	278	279	279	280	281	282	282	282	282	282	282	283	283	284	284	284	284	284	284	284	284	284	285	285	285	285	285	285	285	285	285	285	285	285	285	285	285	285	285	286
Thioester-dependent network, free-energy-unknown reactions excluded
Removed reactions	R00212_F	R03696_R	R00262_F	R00932_R	R04000_F	R03937_R	R02963_F	R03028_F	R00830_F	R01355_R	R00350_R	R00750_F	R03069_R	R00271_F	R00899_R	R01087_R	R01393_F	R01978_R	R03070_R	R03896_F	R07316_R	R00008_R	R00036_F	R00371_F	R00470_R	R00471_R	R00494_R	R02280_R	R02948_F	R03045_R	R03444_F	R03546_R	R03908_R	R05509_R	R08648_F	R00084_F	R00195_R	R00259_F	R00268_R	R00348_R	R00363_F	R00399_F	R00411_R	R00474_R	R00477_R	R00478_R	R00487_F	R00527_R	R00579_F
Number of metabolites	26	167	168	189	190	191	193	193	194	194	195	195	195	196	196	196	196	196	196	196	196	197	197	197	197	197	197	197	197	197	197	197	197	197	197	198	198	198	198	198	198	198	198	198	198	198	198	198	198
[truncated: 5,000 more columns]
